# Supplementary material
Source: publisher figshare collection journal article supplement (https://acs.figshare.com/ndownloader/files/13469507)
Supplement: Supplementary file 1 [file 13469507]

## Sheet: S1 - Block 1 Transcripts
Table S1. MB-VIOP(OnPLS) and VIP(OPLS) values for Block 1 (Transcriptomics) variables.
Probe	Gene Name	Gene Abbreviation	OnPLS MB-VIOP Component 1 (Global)	OnPLS MB-VIOP Component 2 (Local)	OPLS-DA VIP
1007_PM_s_at	discoidin domain receptor tyrosine kinase 1 /// microRNA 4640	DDR1 /// MIR4640	0.738171	1.92282	0.765746
1053_PM_at	replication factor C (activator 1) 2, 40kDa	RFC2	0.565147	0	1.0666
117_PM_at	heat shock 70kDa protein 6 (HSP70B')	HSPA6	0.703529	0	1.06781
121_PM_at	paired box 8	PAX8	1.01968	0.956584	0.843899
1255_PM_g_at	guanylate cyclase activator 1A (retina)	GUCA1A	1.01215	2.05342	2.04833
1294_PM_at	microRNA 5193 /// ubiquitin-like modifier activating enzyme 7	MIR5193 /// UBA7	1.57271	0.741083	1.44936
1316_PM_at	thyroid hormone receptor, alpha	THRA	1.09776	1.13626	0.610135
1320_PM_at	protein tyrosine phosphatase, non-receptor type 21	PTPN21	0.365476	0.616041	0.526707
1405_PM_i_at	chemokine (C-C motif) ligand 5	CCL5	1.68411	0.559905	2.23601
1431_PM_at	cytochrome P450, family 2, subfamily E, polypeptide 1	CYP2E1	0.559047	0	0.200428
1438_PM_at	EPH receptor B3	EPHB3	1.48897	0	0.985973
1487_PM_at	estrogen-related receptor alpha	ESRRA	0.278317	1.28199	0.165057
1494_PM_f_at	cytochrome P450, family 2, subfamily A, polypeptide 6	CYP2A6	1.37391	0.712336	1.61174
1552256_PM_a_at	scavenger receptor class B, member 1	SCARB1	0.444436	0.668125	0.746775
1552257_PM_a_at	tubulin tyrosine ligase-like family, member 12	TTLL12	1.2281	0	0.642763
1552258_PM_at	long intergenic non-protein coding RNA 152	LINC00152	1.11018	1.56135	1.0761
1552261_PM_at	WAP four-disulfide core domain 2	WFDC2	0.360052	0	0.332267
1552263_PM_at	mitogen-activated protein kinase 1	MAPK1	1.12549	0.407333	1.663
1552264_PM_a_at	mitogen-activated protein kinase 1	MAPK1	1.41233	0.465893	1.9849
1552266_PM_at	ADAM metallopeptidase domain 32	ADAM32	0.242333	2.1145	0.695122
1552269_PM_at	spermatogenesis associated 17	SPATA17	0.661908	0.447526	0.627222
1552271_PM_at	proline rich 22	PRR22	1.00272	0.316248	0.113809
1552272_PM_a_at	proline rich 22	PRR22	1.13284	1.25159	1.22668
1552274_PM_at	PX domain containing serine/threonine kinase	PXK	0.759962	0.771938	0.202193
1552275_PM_s_at	PX domain containing serine/threonine kinase	PXK	0.656291	1.225	0.957327
1552276_PM_a_at	vacuolar protein sorting 18 homolog (S. cerevisiae)	VPS18	0.646342	0	1.11453
1552277_PM_a_at	Myb/SANT-like DNA-binding domain containing 3	MSANTD3	0.809151	0	0.809874
1552278_PM_a_at	solute carrier family 46 (folate transporter), member 1	SLC46A1	1.51428	0	1.82757
1552279_PM_a_at	solute carrier family 46 (folate transporter), member 1	SLC46A1	0.833955	0.424908	0.235929
1552280_PM_at	T-cell immunoglobulin and mucin domain containing 4	TIMD4	0.60396	0	0.127842
1552281_PM_at	solute carrier family 39 (metal ion transporter), member 5	SLC39A5	1.0705	1.46031	0.336302
1552283_PM_s_at	uncharacterized LOC100996904 /// zinc finger, DHHC-type containing 11 /// zinc finger, DHHC-type containing 11B	LOC100996904 /// ZDHHC11 /// ZDHHC11B	0.995418	0.807039	0.771544
1552286_PM_at	ATPase, H+ transporting, lysosomal 31kDa, V1 subunit E2 /// uncharacterized LOC440862	ATP6V1E2 /// FLJ41757	0.996527	0.580108	0.459344
1552287_PM_s_at	AFG3 ATPase family member 3-like 1 (S. cerevisiae), pseudogene	AFG3L1P	1.67908	0	1.8863
1552288_PM_at	cartilage intermediate layer protein 2	CILP2	1.12048	1.8785	1.42951
1552289_PM_a_at	cartilage intermediate layer protein 2	CILP2	1.35202	0.299055	1.18847
1552291_PM_at	phosphatidylinositol glycan anchor biosynthesis, class X	PIGX	1.38697	0	1.56287
1552293_PM_at	transmembrane protein 196	TMEM196	0.215481	0.407863	0.184137
1552295_PM_a_at	solute carrier family 39 (zinc transporter), member 13	SLC39A13	1.00971	1.7789	1.44536
1552296_PM_at	bestrophin 4	BEST4	1.34266	0.893935	0.83494
1552299_PM_at	adenylate kinase 9	AK9	0.171741	0.375126	0.337273
1552301_PM_a_at	coronin 6	CORO6	1.02025	0	0.789097
1552302_PM_at	transmembrane protein 106A	TMEM106A	1.0622	0.439665	0.20749
1552303_PM_a_at	transmembrane protein 106A	TMEM106A	0.627164	0	0.716408
1552304_PM_at	ALG10, alpha-1,2-glucosyltransferase	ALG10	0.885414	0	0.635037
1552306_PM_at	ALG10, alpha-1,2-glucosyltransferase	ALG10	0.204642	1.08338	0.291152
1552307_PM_a_at	tetratricopeptide repeat domain 39C	TTC39C	0.512219	1.45	0.373969
1552309_PM_a_at	nexilin (F actin binding protein)	NEXN	0.701434	1.34711	0.684712
1552310_PM_at	chromosome 15 open reading frame 40	C15orf40	0.980252	0	0.893238
1552311_PM_a_at	retina and anterior neural fold homeobox 2	RAX2	0.928903	0.617023	0.948304
1552312_PM_a_at	microfibrillar-associated protein 3	MFAP3	1.00217	0	1.3207
1552314_PM_a_at	eyes absent homolog 3 (Drosophila)	EYA3	0.90355	0	0.974329
1552315_PM_at	GTPase, IMAP family member 1	GIMAP1	1.10078	0	1.65976
1552316_PM_a_at	GTPase, IMAP family member 1	GIMAP1	1.13497	1.09064	0.0308865
1552318_PM_at	GTPase, IMAP family member 1	GIMAP1	0.413114	0.371743	0.0423274
1552319_PM_a_at	kallikrein-related peptidase 8	KLK8	0.458987	0	0.405018
1552320_PM_a_at	coiled-coil domain containing 65	CCDC65	1.02187	0.689435	1.74817
1552321_PM_a_at	coiled-coil domain containing 65	CCDC65	1.13248	1.00583	1.3143
1552322_PM_at	family with sequence similarity 122C	FAM122C	0.922526	0.374098	0.235097
1552323_PM_s_at	family with sequence similarity 122C	FAM122C	1.09067	1.83793	0.0575395
1552325_PM_at	coiled-coil domain containing 11	CCDC11	1.05554	0	1.1087
1552326_PM_a_at	coiled-coil domain containing 11	CCDC11	1.10134	0.49764	0.486241
1552327_PM_at	armadillo repeat containing, X-linked 4	ARMCX4	0.221679	0.114289	0.258966
1552329_PM_at	retinoblastoma binding protein 6	RBBP6	0.52718	0	0.317015
1552330_PM_at	CENPB DNA-binding domains containing 1	CENPBD1	0.12334	1.02431	0.31093
1552332_PM_at	TRIO and F-actin binding protein	TRIOBP	0.298404	1.09952	0.253449
1552334_PM_at	TRIO and F-actin binding protein	TRIOBP	0.516505	0	1.0754
1552335_PM_at	cation channel, sperm associated 1	CATSPER1	0.825251	1.18105	1.10579
1552337_PM_s_at	homeobox D4	HOXD4	0.811521	0	0.56972
1552338_PM_at	goosecoid homeobox	GSC	1.04957	0	1.06259
1552340_PM_at	Sp7 transcription factor	SP7	0.536975	0.364699	0.794416
1552343_PM_s_at	phosphodiesterase 7A	PDE7A	0.888572	0	0.813743
1552344_PM_s_at	CCR4-NOT transcription complex, subunit 7	CNOT7	1.21974	1.49228	1.59578
1552347_PM_at	crystallin, zeta (quinone reductase)-like 1	CRYZL1	0.705944	1.06454	0.0843478
1552348_PM_at	protease, serine, 33	PRSS33	0.951511	0	0.953288
1552349_PM_a_at	protease, serine, 33	PRSS33	0.610527	0.532767	0.762626
1552354_PM_at	chromosome 19 open reading frame 26	C19orf26	0.73414	0.657917	0.321544
1552355_PM_s_at	chromosome 19 open reading frame 26	C19orf26	0.712433	0.742718	0.0337253
1552359_PM_at	minichromosome maintenance domain containing 2	MCMDC2	0.726711	1.07845	0.835308
1552360_PM_a_at	toll-interleukin 1 receptor (TIR) domain containing adaptor protein	TIRAP	1.08301	1.09698	0.917974
1552362_PM_a_at	liver expressed antimicrobial peptide 2	LEAP2	0.312277	0.806843	0.288942
1552364_PM_s_at	musashi RNA-binding protein 2	MSI2	0.792492	2.132	0.313793
1552365_PM_at	scinderin	SCIN	1.58162	0.722419	1.01829
1552367_PM_a_at	scinderin	SCIN	0.386545	0	0.403012
1552368_PM_at	CCCTC-binding factor (zinc finger protein)-like	CTCFL	0.485536	0	0.245971
1552370_PM_at	chromosome 4 open reading frame 33	C4orf33	1.19005	0.572922	0.636146
1552372_PM_at	chromosome 4 open reading frame 33	C4orf33	1.14727	1.94209	1.60093
1552373_PM_s_at	chromosome 4 open reading frame 33	C4orf33	0.103062	0	0.252731
1552375_PM_at	zinc finger protein 333	ZNF333	0.555676	0.811976	0.412963
1552377_PM_s_at	trans-golgi network vesicle protein 23 homolog C (S. cerevisiae)	TVP23C	0.410201	1.21212	1.50297
1552378_PM_s_at	retinol dehydrogenase 10 (all-trans)	RDH10	0.839114	0.977611	0.787721
1552379_PM_at	retinol dehydrogenase 10 (all-trans)	RDH10	0.384665	0.945233	0.130943
1552381_PM_at	serine/arginine-rich splicing factor 12	SRSF12	0.470391	1.24318	0.0247712
1552383_PM_at	family with sequence similarity 71, member A	FAM71A	0.490925	0.57146	0.734913
1552384_PM_a_at	family with sequence similarity 71, member A	FAM71A	0.602628	0	0.0189682
1552386_PM_at	GRB2-binding adaptor protein, transmembrane	GAPT	0.93195	0	0.359328
1552388_PM_at	---	---	0.784635	1.00737	0.787259
1552389_PM_at	chromosome 8 open reading frame 47	C8orf47	0.825052	0.833896	0.592297
1552390_PM_a_at	chromosome 8 open reading frame 47	C8orf47	1.14893	0.870024	1.43466
1552391_PM_at	chromosome 1 open reading frame 65	C1orf65	0.24418	1.05608	0.364677
1552393_PM_at	ENTH domain containing 1	ENTHD1	0.428781	1.62333	0.55104
1552394_PM_a_at	ENTH domain containing 1	ENTHD1	0.599348	1.55624	1.04428
1552395_PM_at	testis-specific serine kinase 3	TSSK3	0.771125	0	1.13375
1552396_PM_at	WAP four-disulfide core domain 6	WFDC6	1.57384	0.920147	1.56586
1552398_PM_a_at	C-type lectin domain family 12, member A	CLEC12A	0.417497	0.710267	0.235323
1552399_PM_a_at	BRF1, RNA polymerase III transcription initiation factor 90 kDa subunit	BRF1	0.620804	0.172841	0.390839
1552400_PM_a_at	chromosome 15 open reading frame 27	C15orf27	0.223974	0.360063	0.256552
1552401_PM_a_at	BTB and CNC homology 1, basic leucine zipper transcription factor 1 /// GRIK1 antisense RNA 2	BACH1 /// GRIK1-AS2	1.46772	1.52416	1.25871
1552402_PM_at	calmodulin-like 6	CALML6	1.0717	0.936634	0.579515
1552405_PM_at	NLR family, pyrin domain containing 5	NLRP5	0.924053	0.846287	0.831054
1552408_PM_at	outer dense fiber of sperm tails 4	ODF4	0.179705	2.48562	0.607657
1552409_PM_a_at	outer dense fiber of sperm tails 4	ODF4	1.22692	1.51796	1.05061
1552410_PM_at	C-type lectin domain family 4, member F	CLEC4F	0.83192	0.196187	0.740306
1552411_PM_at	defensin, beta 106A /// defensin, beta 106B	DEFB106A /// DEFB106B	1.27358	0.621479	0.75441
1552412_PM_a_at	defensin, beta 106A /// defensin, beta 106B	DEFB106A /// DEFB106B	0.845105	0.744111	0.45164
1552414_PM_at	WAP four-disulfide core domain 9	WFDC9	1.65257	0	1.41947
1552415_PM_a_at	WAP four-disulfide core domain 9	WFDC9	0.821055	0	0.477751
1552417_PM_a_at	neural precursor cell expressed, developmentally down-regulated 1	NEDD1	0.707189	1.51618	0.531438
1552418_PM_at	tubulin tyrosine ligase-like family, member 10	TTLL10	1.52693	0	1.00103
1552419_PM_s_at	tubulin tyrosine ligase-like family, member 10	TTLL10	1.6067	0	1.91176
1552421_PM_a_at	calreticulin 3	CALR3	1.43104	0	1.05404
1552422_PM_at	chromosome 10 open reading frame 25	C10orf25	1.46883	0.903018	1.2584
1552423_PM_at	ets variant 3	ETV3	0.268296	0	0.965454
1552424_PM_at	kelch-like family member 10	KLHL10	1.06985	1.08928	0.593017
1552425_PM_a_at	kelch-like family member 10	KLHL10	0.579783	1.06727	0.205545
1552426_PM_a_at	TM2 domain containing 3	TM2D3	1.24738	1.03523	0.67625
1552427_PM_at	zinc finger protein 485	ZNF485	1.01767	1.83716	0.879229
1552430_PM_at	WD repeat domain 17	WDR17	0.259842	0	0.254326
1552432_PM_at	major facilitator superfamily domain containing 6-like	MFSD6L	1.08625	0	1.60934
1552436_PM_a_at	cadherin-related 23 /// cadherin-23-like	CDH23 /// LOC100653137	0.803447	0	1.21242
1552438_PM_a_at	ankyrin and armadillo repeat containing	ANKAR	0.676848	0.28887	0.777472
1552439_PM_s_at	multiple EGF-like-domains 11	MEGF11	0.137007	0	0.339348
1552440_PM_at	G protein-coupled receptor 182	GPR182	0.680204	1.36336	0.568065
1552445_PM_a_at	ESX homeobox 1	ESX1	0.672965	0.85659	0.17031
1552448_PM_a_at	chromosome 8 open reading frame 12	C8orf12	0.823299	0	1.02764
1552449_PM_a_at	secretoglobin, family 1C, member 1-like /// secretoglobin, family 1C, member 1	LOC653486 /// SCGB1C1	1.33761	0	1.41282
1552450_PM_a_at	DnaJ (Hsp40) homolog, subfamily C, member 5 gamma	DNAJC5G	1.18713	0	1.51334
1552452_PM_at	WD repeat domain 88	WDR88	0.649542	0	0.55951
1552453_PM_a_at	WD repeat domain 88	WDR88	1.04921	0	1.07576
1552455_PM_at	prune homolog 2 (Drosophila)	PRUNE2	0.644259	0.994176	1.00512
1552456_PM_a_at	methyl-CpG binding domain protein 3-like 2	MBD3L2	0.667008	0.27896	1.36371
1552457_PM_a_at	ADAMTS-like 1	ADAMTSL1	0.804004	0	0.489004
1552458_PM_at	methyl-CpG binding domain protein 3-like 1	MBD3L1	1.47567	0	0.078369
1552459_PM_a_at	methyl-CpG binding domain protein 3-like 1	MBD3L1	1.11121	0.241336	1.02517
1552461_PM_at	family with sequence similarity 46, member D	FAM46D	1.31272	0.368475	0.945675
1552463_PM_at	serpin peptidase inhibitor, clade B (ovalbumin), member 11 (gene/pseudogene)	SERPINB11	0.971544	0.562017	0.5213
1552466_PM_x_at	long intergenic non-protein coding RNA 161	LINC00161	0.763874	0	0.569064
1552467_PM_at	Down syndrome critical region gene 10 (non-protein coding)	DSCR10	1.30835	0.453461	0.685408
1552468_PM_a_at	Down syndrome critical region gene 10 (non-protein coding)	DSCR10	0.722412	0.30886	0.999708
1552470_PM_a_at	abhydrolase domain containing 11	ABHD11	0.551459	0.42681	0.454896
1552472_PM_a_at	ArfGAP with coiled-coil, ankyrin repeat and PH domains 2	ACAP2	1.51909	0.610192	1.49317
1552473_PM_at	guanidinoacetate N-methyltransferase	GAMT	1.0167	1.53888	1.1017
1552474_PM_a_at	guanidinoacetate N-methyltransferase	GAMT	1.06602	0	0.913175
1552476_PM_s_at	phospholipase C, delta 3	PLCD3	0.876466	0.421473	1.09361
1552477_PM_a_at	interferon regulatory factor 6	IRF6	0.987915	0	0.581169
1552478_PM_a_at	interferon regulatory factor 6	IRF6	1.12817	2.07027	1.20395
1552480_PM_s_at	protein tyrosine phosphatase, receptor type, C	PTPRC	1.44051	0	1.58077
1552481_PM_s_at	mannosidase, alpha, class 1A, member 2	MAN1A2	1.42647	0.515515	0.862181
1552482_PM_at	Ras association (RalGDS/AF-6) and pleckstrin homology domains 1	RAPH1	1.52457	0.718455	1.55548
1552484_PM_at	Smith-Magenis syndrome chromosome region, candidate 8	SMCR8	0.727272	0	0.99763
1552485_PM_at	lactamase, beta	LACTB	0.327185	0.505996	0.617538
1552486_PM_s_at	lactamase, beta	LACTB	0.903475	0.867093	0.814261
1552487_PM_a_at	basonuclin 1	BNC1	0.48153	0.473915	0.0623017
1552489_PM_s_at	membrane protein, palmitoylated 4 (MAGUK p55 subfamily member 4)	MPP4	0.113368	1.18974	0.382306
1552490_PM_at	lactation elevated 1	LACE1	1.12728	0	0.757006
1552491_PM_at	isopentenyl-diphosphate delta isomerase 2	IDI2	0.706332	0	0.4396
1552493_PM_s_at	cytochrome P450, family 11, subfamily B, polypeptide 1	CYP11B1	1.23004	1.41419	0.903049
1552494_PM_at	TAF8 RNA polymerase II, TATA box binding protein (TBP)-associated factor, 43kDa	TAF8	0.800533	0	0.91542
1552496_PM_a_at	cordon-bleu WH2 repeat protein	COBL	0.724496	0	0.49189
1552497_PM_a_at	SLAM family member 6	SLAMF6	1.40451	0.546796	1.95144
1552498_PM_at	zinc finger and SCAN domain containing 20	ZSCAN20	0.523654	0.235305	0.63268
1552499_PM_a_at	zinc finger and SCAN domain containing 20	ZSCAN20	1.13605	1.23013	1.39193
1552501_PM_a_at	G protein-coupled bile acid receptor 1	GPBAR1	0.548884	0	0.12025
1552502_PM_s_at	rhomboid, veinlet-like 2 (Drosophila)	RHBDL2	1.0832	0.86325	0.375335
1552503_PM_at	Fraser syndrome 1	FRAS1	0.910156	0	1.1238
1552504_PM_a_at	BR serine/threonine kinase 1	BRSK1	0.253139	1.11878	0.221592
1552506_PM_at	crumbs homolog 2 (Drosophila)	CRB2	0.58298	0.657376	0.611217
1552507_PM_at	potassium voltage-gated channel, Isk-related family, member 4	KCNE4	1.05147	0.939597	1.22539
1552508_PM_at	potassium voltage-gated channel, Isk-related family, member 4	KCNE4	0.223266	0	0.0758136
1552509_PM_a_at	CD300 molecule-like family member g	CD300LG	2.02432	0.471112	2.32381
1552510_PM_at	solute carrier family 34 (sodium phosphate), member 3	SLC34A3	0.774071	0.75198	1.03456
1552511_PM_a_at	carboxypeptidase A6	CPA6	1.11145	0	1.11911
1552514_PM_at	WBP2 N-terminal like	WBP2NL	0.485199	0	0.28011
1552515_PM_at	homeodomain interacting protein kinase 1	HIPK1	0.712343	0.906481	0.562572
1552516_PM_a_at	homeodomain interacting protein kinase 1	HIPK1	0.523878	0.428936	0.0875275
1552518_PM_s_at	Mdm2, transformed 3T3 cell double minute 2, p53 binding protein (mouse) binding protein, 104kDa	MTBP	0.464947	0	0.111566
1552519_PM_at	activin A receptor, type IC	ACVR1C	0.349402	0	0.194511
1552520_PM_at	transmembrane protein 74	TMEM74	0.736251	0	0.0613939
1552521_PM_a_at	transmembrane protein 74	TMEM74	1.71248	1.74899	2.10664
1552522_PM_at	tigger transposable element derived 4	TIGD4	0.750509	0.0869151	0.0215868
1552523_PM_a_at	tigger transposable element derived 4	TIGD4	1.45566	0.801988	0.897807
1552524_PM_at	ADP-ribosyltransferase 5	ART5	0.540477	0	0.309674
1552526_PM_at	family with sequence similarity 71, member C	FAM71C	0.759459	0	0.572214
1552528_PM_at	chromosome 21 open reading frame 67	C21orf67	0.579359	1.0438	0.270334
1552531_PM_a_at	NLR family, pyrin domain containing 11	NLRP11	0.74241	0.610429	0.479432
1552532_PM_a_at	ATPase, H+ transporting, lysosomal 42kDa, V1 subunit C2	ATP6V1C2	0.939482	1.11359	0.424392
1552535_PM_at	claudin 19	CLDN19	0.555787	0	0.0180196
1552536_PM_at	vesicle transport through interaction with t-SNAREs 1A	VTI1A	0.789209	0.323549	0.53443
1552538_PM_a_at	kinesin family member 6	KIF6	0.964475	0.660337	0.854504
1552540_PM_s_at	IQ motif containing D	IQCD	0.984565	0	0.876644
1552541_PM_at	T-cell activation RhoGTPase activating protein	TAGAP	1.42287	1.40609	1.89946
1552542_PM_s_at	T-cell activation RhoGTPase activating protein	TAGAP	0.902414	0.689118	0.796555
1552543_PM_a_at	stonin 2	STON2	0.760588	1.72527	0.511081
1552544_PM_at	serpin peptidase inhibitor, clade A (alpha-1 antiproteinase, antitrypsin), member 12	SERPINA12	0.684865	0	0.227238
1552546_PM_a_at	leucine zipper-EF-hand containing transmembrane protein 2	LETM2	0.582923	0.947942	0.826481
1552548_PM_at	Bartter syndrome, infantile, with sensorineural deafness (Barttin)	BSND	0.0815911	0.539499	0.167994
1552549_PM_a_at	Bartter syndrome, infantile, with sensorineural deafness (Barttin)	BSND	1.67649	0.606614	1.84576
1552552_PM_s_at	C-type lectin domain family 4, member C	CLEC4C	1.10049	0.839526	0.792475
1552553_PM_a_at	NLR family, CARD domain containing 4	NLRC4	0.767082	0	0.0572117
1552554_PM_a_at	NLR family, CARD domain containing 4	NLRC4	1.33118	1.61457	0.651389
1552555_PM_at	protease, serine, 36	PRSS36	0.197659	0	0.507109
1552557_PM_a_at	zinc finger, DHHC-type containing 15	ZDHHC15	1.07552	0	1.55489
1552558_PM_a_at	retinoic acid induced 1	RAI1	0.544689	1.16431	0.302565
1552559_PM_a_at	cyclin-dependent kinase 15	CDK15	1.48798	0.305291	1.12573
1552562_PM_at	zinc finger protein 570	ZNF570	0.880674	0.466456	1.37213
1552563_PM_a_at	NULL /// NULL	AF131215.4 /// OTTHUMG00000165426	0.104006	0.720098	0.457106
1552564_PM_at	nudix (nucleoside diphosphate linked moiety X)-type motif 9 pseudogene 1	NUDT9P1	0.656629	0.555468	0.900813
1552566_PM_at	BTB (POZ) domain containing 16	BTBD16	1.79359	0.499441	2.34817
1552568_PM_at	receptor (chemosensory) transporter protein 3	RTP3	1.46984	0	1.79316
1552569_PM_a_at	receptor (chemosensory) transporter protein 3	RTP3	0.755809	1.34683	0.579791
1552570_PM_at	thrombospondin-type laminin G domain and EAR repeats	TSPEAR	1.66442	0.773075	1.7587
1552572_PM_a_at	mirror-image polydactyly 1	MIPOL1	0.308099	1.64514	0.0604866
1552573_PM_s_at	mirror-image polydactyly 1	MIPOL1	0.42548	0.926911	1.31977
1552575_PM_a_at	chromosome 6 open reading frame 141	C6orf141	1.25837	0.51972	1.51925
1552576_PM_at	Alstrom syndrome 1 pseudogene	ALMS1P	0.578333	0.835647	0.144961
1552578_PM_a_at	myosin IIIB	MYO3B	1.53573	0.369667	0.651172
1552579_PM_a_at	ADAM metallopeptidase domain 21	ADAM21	1.08258	1.28365	0.126782
1552580_PM_at	tripartite motif family-like 2	TRIML2	1.06259	0.690118	1.08675
1552582_PM_at	ATP-binding cassette, sub-family C (CFTR/MRP), member 13, pseudogene	ABCC13	1.2053	0.449443	0.732198
1552583_PM_s_at	ATP-binding cassette, sub-family C (CFTR/MRP), member 13, pseudogene	ABCC13	0.942925	0.493379	1.82351
1552584_PM_at	interleukin 12 receptor, beta 1	IL12RB1	1.63099	1.32782	1.41226
1552585_PM_s_at	general transcription factor IIA, 1-like	GTF2A1L	0.796827	0	0.358563
1552586_PM_at	transient receptor potential cation channel, subfamily V, member 3	TRPV3	0.584835	0.833732	0.829284
1552587_PM_at	cyclic nucleotide binding domain containing 1	CNBD1	0.246514	0.664634	0.452551
1552588_PM_a_at	cyclic nucleotide binding domain containing 1	CNBD1	0.0333257	0	0.332241
1552590_PM_a_at	ATP-binding cassette, sub-family C (CFTR/MRP), member 12	ABCC12	1.20509	0	1.26945
1552592_PM_at	matrix metallopeptidase 21	MMP21	1.08552	0.442533	1.00478
1552594_PM_at	transmembrane protein 190	TMEM190	1.29531	1.01262	1.43414
1552596_PM_at	growth arrest-specific 2 like 2	GAS2L2	0.995749	0	0.715634
1552598_PM_at	potassium voltage-gated channel, subfamily G, member 4	KCNG4	0.844963	0	0.123468
1552599_PM_at	peroxisomal, testis specific 1	PXT1	0.447526	0.137943	1.07876
1552602_PM_at	calcium channel, voltage-dependent, gamma subunit 5	CACNG5	1.137	0.76126	1.65467
1552604_PM_at	long intergenic non-protein coding RNA 308	LINC00308	0.890191	0.405618	1.67571
1552605_PM_s_at	long intergenic non-protein coding RNA 308	LINC00308	0.368582	1.18674	0.0348937
1552607_PM_at	family with sequence similarity 223, member A (non-protein coding)	FAM223A	0.00215749	0.695943	0.349049
1552608_PM_at	WAP four-disulfide core domain 11	WFDC11	0.377593	0.915258	0.0140474
1552609_PM_s_at	interferon, lambda 2 /// interferon, lambda 3	IFNL2 /// IFNL3	1.20647	1.08065	0.761263
1552610_PM_a_at	Janus kinase 1	JAK1	0.759368	1.65376	0.497712
1552611_PM_a_at	Janus kinase 1	JAK1	0.843758	0.37449	0.956817
1552612_PM_at	CDC42 small effector 2	CDC42SE2	1.1125	2.05028	1.2523
1552613_PM_s_at	CDC42 small effector 2	CDC42SE2	1.96467	0	1.91931
1552615_PM_at	acetyl-CoA carboxylase beta	ACACB	1.3743	0.685427	0.96061
1552616_PM_a_at	acetyl-CoA carboxylase beta	ACACB	0.928918	0.438749	0.280307
1552617_PM_a_at	ring finger and WD repeat domain 2, E3 ubiquitin protein ligase	RFWD2	1.9314	0.588051	1.08603
1552618_PM_at	syntaxin 6	STX6	1.24145	0.436436	1.32239
1552619_PM_a_at	anillin, actin binding protein	ANLN	1.20999	2.08489	1.39456
1552620_PM_at	small proline-rich protein 4	SPRR4	0.911362	1.70151	0.830289
1552621_PM_at	polymerase (RNA) II (DNA directed) polypeptide J2 /// polymerase (RNA) II (DNA directed) polypeptide J3 /// uroplakin 3B-like	POLR2J2 /// POLR2J3 /// UPK3BL	0.395604	0	0.736297
1552622_PM_s_at	postmeiotic segregation increased 2 pseudogene /// polymerase (RNA) II (DNA directed) polypeptide J2 /// polymerase (RNA) II (DNA directed) polypeptide J3 /// uroplakin 3B-like	LOC441259 /// POLR2J2 /// POLR2J3 /// UPK3BL	0.695682	2.22993	0.717691
1552623_PM_at	hematopoietic SH2 domain containing	HSH2D	0.219549	0	0.507198
1552625_PM_a_at	tRNA nucleotidyl transferase, CCA-adding, 1	TRNT1	0.725051	0.536604	0.322011
1552626_PM_a_at	transmembrane protein 163	TMEM163	0.36042	0	0.64645
1552627_PM_a_at	Rho GTPase activating protein 5	ARHGAP5	0.621806	0	0.290485
1552628_PM_a_at	HERPUD family member 2	HERPUD2	1.32152	1.03317	1.10846
1552629_PM_a_at	jumonji domain containing 6	JMJD6	0.527891	0.328378	0.0504983
1552630_PM_a_at	Snf2-related CREBBP activator protein	SRCAP	0.241719	0	0.0494011
1552631_PM_a_at	mitogen-activated protein kinase kinase kinase 6	MAP3K6	0.230288	0.465379	0.44676
1552632_PM_a_at	arylsulfatase G	ARSG	1.17183	0.865078	1.42002
1552633_PM_at	zinc finger protein 101	ZNF101	1.09213	1.04538	1.56234
1552634_PM_a_at	zinc finger protein 101	ZNF101	0.582248	2.33295	0.525152
1552637_PM_at	protein tyrosine phosphatase, non-receptor type 11	PTPN11	0.911338	0	0.462807
1552639_PM_at	kelch domain containing 7B	KLHDC7B	0.955246	0.785216	0.581606
1552641_PM_s_at	ATPase family, AAA domain containing 3A /// ATPase family, AAA domain containing 3B	ATAD3A /// ATAD3B	0.434868	0	1.34072
1552643_PM_at	zinc finger protein 626	ZNF626	1.16333	0.467265	0.145743
1552644_PM_a_at	polyhomeotic homolog 3 (Drosophila)	PHC3	0.575558	1.94052	0.203997
1552646_PM_at	interleukin 11 receptor, alpha	IL11RA	0.614528	0	0.32861
1552648_PM_a_at	tumor necrosis factor receptor superfamily, member 10a	TNFRSF10A	0.85158	1.47675	1.10791
1552649_PM_a_at	RAD51L3-RFFL readthrough /// ring finger and FYVE-like domain containing E3 ubiquitin protein ligase	RAD51L3-RFFL /// RFFL	0.326829	0.500977	0.0704724
1552651_PM_a_at	RAD51L3-RFFL readthrough /// ring finger and FYVE-like domain containing E3 ubiquitin protein ligase	RAD51L3-RFFL /// RFFL	0.417538	0	0.818151
1552652_PM_at	Hermansky-Pudlak syndrome 4	HPS4	0.531213	0	0.510329
1552656_PM_s_at	U2AF homology motif (UHM) kinase 1	UHMK1	1.07361	0	1.49839
1552657_PM_a_at	thioredoxin domain containing 2 (spermatozoa)	TXNDC2	0.717448	0.69207	0.689587
1552658_PM_a_at	neuron navigator 3	NAV3	1.68961	1.09035	1.76801
1552660_PM_a_at	chromosome 5 open reading frame 22	C5orf22	0.391811	0.708952	0.181201
1552661_PM_at	protocadherin gamma subfamily B, 7	PCDHGB7	0.75638	2.0791	1.43384
1552662_PM_a_at	protocadherin gamma subfamily B, 7	PCDHGB7	0.970195	0.356058	1.13552
1552663_PM_a_at	ELKS/RAB6-interacting/CAST family member 1	ERC1	0.760462	0.751643	0.318627
1552664_PM_at	folliculin	FLCN	0.387156	0	0.458853
1552665_PM_at	JMJD1C antisense RNA 1	JMJD1C-AS1	1.14323	0.411169	1.41459
1552666_PM_a_at	leucine rich repeat containing 7	LRRC7	1.36439	1.5356	1.42965
1552667_PM_a_at	SH2 domain containing 3C	SH2D3C	0.563686	1.89299	0.21419
1552669_PM_at	protein phosphatase 1, regulatory subunit 3B	PPP1R3B	0.251146	0	0.65425
1552670_PM_a_at	protein phosphatase 1, regulatory subunit 3B	PPP1R3B	1.06438	1.25428	1.47515
1552671_PM_a_at	solute carrier family 9, subfamily A (NHE7, cation proton antiporter 7), member 7	SLC9A7	0.18624	0.632415	0.239813
1552672_PM_a_at	immunoglobulin superfamily, member 3	IGSF3	1.09781	0.827773	0.704977
1552673_PM_at	regulatory factor X, 6	RFX6	1.13302	0	0.723287
1552674_PM_at	disrupted in renal carcinoma 1	DIRC1	1.4332	0.905147	1.3284
1552675_PM_at	DnaJ (Hsp40) homolog, subfamily B, member 7	DNAJB7	0.245517	0	0.773187
1552676_PM_at	urocortin 3	UCN3	1.40224	0.531025	1.00677
1552677_PM_a_at	DIP2 disco-interacting protein 2 homolog A (Drosophila)	DIP2A	1.66247	0.942812	1.62101
1552678_PM_a_at	ubiquitin specific peptidase 28	USP28	1.42312	0	2.05518
1552680_PM_a_at	cancer susceptibility candidate 5	CASC5	0.562372	0	1.02149
1552682_PM_a_at	cancer susceptibility candidate 5	CASC5	1.26095	0.239956	0.326144
1552684_PM_a_at	SUMO/sentrin specific peptidase family member 8	SENP8	1.35623	0.569159	1.6306
1552685_PM_a_at	grainyhead-like 1 (Drosophila)	GRHL1	1.69886	0.701411	2.1591
1552686_PM_at	cyclic nucleotide binding domain containing 2	CNBD2	0.433566	0	0.0310627
1552687_PM_a_at	cyclic nucleotide binding domain containing 2	CNBD2	1.003	1.49845	1.25629
1552689_PM_at	CASK interacting protein 1	CASKIN1	1.22375	0	1.38294
1552690_PM_a_at	calcium channel, voltage-dependent, alpha 2/delta subunit 4	CACNA2D4	0.297376	1.19611	0.328028
1552691_PM_at	ADP-ribosylation factor-like 11	ARL11	0.827937	0.763749	0.166479
1552693_PM_at	ADP-ribosylation factor-like 11	ARL11	0.972691	1.19486	1.38503
1552694_PM_at	solute carrier family 2 (facilitated glucose transporter), member 13	SLC2A13	0.963757	0	1.11676
1552695_PM_a_at	solute carrier family 2 (facilitated glucose transporter), member 13	SLC2A13	0.947068	1.14348	0.106581
1552696_PM_at	non imprinted in Prader-Willi/Angelman syndrome 1	NIPA1	1.20366	0	1.35602
1552698_PM_at	tubulin, alpha 3f, pseudogene	TUBA3FP	0.644608	0	0.946421
1552701_PM_a_at	caspase recruitment domain family, member 16	CARD16	0.444733	1.81076	0.172446
1552703_PM_s_at	caspase recruitment domain family, member 16 /// caspase 1, apoptosis-related cysteine peptidase	CARD16 /// CASP1	0.565563	0	0.559429
1552705_PM_at	dual specificity phosphatase 19	DUSP19	0.204796	0.44329	0.295521
1552708_PM_a_at	dual specificity phosphatase 19	DUSP19	0.215632	1.47012	0.723519
1552711_PM_a_at	cytochrome b5 domain containing 1	CYB5D1	0.801028	0	0.35487
1552712_PM_a_at	nicotinamide nucleotide adenylyltransferase 2	NMNAT2	0.0555888	0	0.410479
1552713_PM_a_at	solute carrier family 4, anion exchanger, member 1 (erythrocyte membrane protein band 3, Diego blood group)	SLC4A1	1.21374	0.58054	1.31747
1552714_PM_at	cellular repressor of E1A-stimulated genes 2	CREG2	0.362927	0.606703	0.226518
1552715_PM_a_at	relaxin/insulin-like family peptide receptor 1	RXFP1	0.893933	0	0.766033
1552716_PM_at	sperm flagellar 2	SPEF2	0.630813	0	0.866471
1552717_PM_s_at	centrosomal protein 170kDa /// centrosomal protein 170kDa pseudogene 1	CEP170 /// CEP170P1	0.59608	2.0851	0.266748
1552718_PM_at	D-tyrosyl-tRNA deacylase 1	DTD1	0.666538	0.420884	1.0781
1552719_PM_at	cancer susceptibility candidate 4	CASC4	0.485346	0.606928	0.776455
1552721_PM_a_at	fibroblast growth factor 1 (acidic)	FGF1	1.44581	0.888834	1.58923
1552722_PM_at	cAMP-regulated phosphoprotein, 21kDa	ARPP21	0.496922	1.39932	0.0386041
1552724_PM_at	Rhox homeobox family, member 1	RHOXF1	1.09624	0	1.06978
1552725_PM_s_at	ADAM metallopeptidase with thrombospondin type 1 motif, 17	ADAMTS17	1.36914	0.549649	1.47392
1552726_PM_at	ADAM metallopeptidase with thrombospondin type 1 motif, 17	ADAMTS17	0.537195	0.297938	1.08358
1552727_PM_s_at	ADAM metallopeptidase with thrombospondin type 1 motif, 17	ADAMTS17	1.01932	0	0.159475
1552729_PM_at	small nucleolar RNA host gene 7 (non-protein coding) /// small nucleolar RNA, H/ACA box 17 /// small nucleolar RNA, H/ACA box 43	SNHG7 /// SNORA17 /// SNORA43	0.889534	0.374795	0.555938
1552730_PM_at	desert hedgehog	DHH	1.09159	0	1.06186
1552731_PM_at	actin-binding Rho activating protein	ABRA	0.986151	1.65401	0.644914
1552732_PM_at	actin-binding Rho activating protein	ABRA	0.54573	0.7507	0.32232
1552733_PM_at	kelch domain containing 1	KLHDC1	1.28319	0	1.53393
1552734_PM_at	RPTOR independent companion of MTOR, complex 2	RICTOR	0.209386	0.555677	0.555882
1552735_PM_at	protocadherin gamma subfamily A, 4	PCDHGA4	1.18001	0.772339	0.901968
1552736_PM_a_at	neuropilin (NRP) and tolloid (TLL)-like 1	NETO1	0.112159	0	0.0285441
1552737_PM_s_at	WW domain containing E3 ubiquitin protein ligase 2	WWP2	0.518091	2.25912	0.984529
1552738_PM_a_at	suppression of tumorigenicity 7 like	ST7L	0.765088	1.23573	0.530108
1552739_PM_s_at	suppression of tumorigenicity 7 like	ST7L	0.55754	0	0.864216
1552740_PM_at	chromosome 2 open reading frame 15 /// mitochondrial ribosomal protein L30	C2orf15 /// MRPL30	0.696731	1.52885	0.204602
1552742_PM_at	potassium voltage-gated channel, subfamily H (eag-related), member 8	KCNH8	0.669783	0	0.0245757
1552743_PM_at	MCF.2 cell line derived transforming sequence-like	MCF2L	1.49353	1.05135	1.68715
1552745_PM_at	solute carrier organic anion transporter family, member 6A1	SLCO6A1	1.06109	0.393092	0.814404
1552747_PM_a_at	protein phosphatase 2C-like domain containing 1	PP2D1	0.350133	0.510309	0.42379
1552749_PM_a_at	kinesin light chain 3	KLC3	0.848873	0.269413	0.407081
1552750_PM_at	calcium and integrin binding family member 3	CIB3	0.750225	0.177271	0.70742
1552751_PM_a_at	calcium and integrin binding family member 3	CIB3	0.907216	0.166054	0.21568
1552752_PM_a_at	cell adhesion molecule 2	CADM2	0.906436	1.53092	0.310714
1552754_PM_a_at	cell adhesion molecule 2	CADM2	0.693476	0.327759	0.0246566
1552755_PM_at	chromosome 9 open reading frame 66	C9orf66	1.35327	0	2.02449
1552757_PM_s_at	NULL	C9orf66	1.3141	0.319791	1.75344
1552758_PM_at	histone deacetylase 9	HDAC9	0.694396	1.33304	0.0618182
1552760_PM_at	histone deacetylase 9	HDAC9	0.783622	0.853134	1.16924
1552761_PM_at	solute carrier family 16, member 11 (monocarboxylic acid transporter 11)	SLC16A11	0.990868	1.4796	1.08634
1552763_PM_at	transmembrane protein 67	TMEM67	1.03683	0.863359	1.42383
1552765_PM_x_at	transmembrane protein 67	TMEM67	0.67044	1.14444	0.0646424
1552766_PM_at	heparan sulfate 6-O-sulfotransferase 2	HS6ST2	0.971898	1.07283	0.723383
1552767_PM_a_at	heparan sulfate 6-O-sulfotransferase 2	HS6ST2	0.62938	0.858574	0.54477
1552768_PM_at	calcium/calmodulin-dependent protein kinase kinase 1, alpha	CAMKK1	0.913154	1.46528	1.41655
1552769_PM_at	zinc finger protein 625	ZNF625	1.04105	0.829943	1.29606
1552770_PM_s_at	zinc finger protein 563	ZNF563	0.662911	0	0.0791679
1552771_PM_a_at	lin-9 homolog (C. elegans)	LIN9	0.733954	0	0.252308
1552772_PM_at	C-type lectin domain family 4, member D	CLEC4D	0.199619	0.555981	0.90128
1552773_PM_at	C-type lectin domain family 4, member D	CLEC4D	1.17162	1.36377	0.691918
1552774_PM_a_at	solute carrier family 25, member 27	SLC25A27	0.145678	0.568029	0.153237
1552775_PM_at	G protein-coupled receptor, family C, group 6, member A	GPRC6A	1.26073	0	1.13985
1552777_PM_a_at	retinoic acid early transcript 1E	RAET1E	0.967899	0.715768	1.31171
1552779_PM_a_at	solute carrier family 44, member 5	SLC44A5	0.869747	0	0.54493
1552782_PM_at	solute carrier family 44, member 5	SLC44A5	0.665564	0	0.441839
1552783_PM_at	zinc finger protein 417	ZNF417	1.45045	0.798964	0.869591
1552785_PM_at	zinc finger protein 781	ZNF781	1.28563	0	1.16067
1552787_PM_at	helicase (DNA) B	HELB	0.545053	0.953337	0.814605
1552788_PM_a_at	helicase (DNA) B	HELB	1.06775	1.13329	1.44769
1552789_PM_at	SEC62 homolog (S. cerevisiae)	SEC62	0.60672	0.954113	0.202525
1552790_PM_a_at	SEC62 homolog (S. cerevisiae)	SEC62	0.336895	0.488118	0.0870202
1552791_PM_a_at	triadin	TRDN	0.515554	0	0.117714
1552792_PM_at	suppressor of cytokine signaling 4	SOCS4	0.0558405	0.774773	0.0189189
1552793_PM_at	chromosome 8 open reading frame 31	C8orf31	0.657084	0.800383	0.368064
1552794_PM_a_at	zinc finger protein 547	ZNF547	1.37664	0.251815	1.54288
1552796_PM_a_at	single-minded homolog 1 (Drosophila)	SIM1	0.831721	0.501634	0.47559
1552797_PM_s_at	prominin 2	PROM2	1.11655	2.52312	1.48566
1552798_PM_a_at	toll-like receptor 4	TLR4	0.540797	1.45355	0.966932
1552799_PM_at	t-SNARE domain containing 1	TSNARE1	0.574309	1.02959	0.952546
1552800_PM_at	abhydrolase domain containing 11	ABHD11	0.356195	0	0.123925
1552801_PM_at	calpain 13	CAPN13	0.872751	0	1.2442
1552803_PM_a_at	stathmin 1	STMN1	0.294237	0.879316	0.183804
1552804_PM_a_at	toll-interleukin 1 receptor (TIR) domain containing adaptor protein	TIRAP	0.141488	0	0.360122
1552806_PM_a_at	sialic acid binding Ig-like lectin 10	SIGLEC10	0.634081	0.339152	0.541605
1552807_PM_a_at	sialic acid binding Ig-like lectin 10	SIGLEC10	0.361018	0.226665	0.0892632
1552808_PM_at	ADAMTS-like 1	ADAMTSL1	0.692031	0	0.388361
1552809_PM_at	regulatory factor X, 4 (influences HLA class II expression)	RFX4	0.858172	0	1.40594
1552811_PM_at	WAP, follistatin/kazal, immunoglobulin, kunitz and netrin domain containing 1	WFIKKN1	1.49852	1.5004	1.70552
1552812_PM_a_at	SUMO1/sentrin specific peptidase 1	SENP1	1.62731	0	1.84349
1552813_PM_at	Kruppel-like factor 14	KLF14	0.597626	0.810777	0.272547
1552814_PM_a_at	Kruppel-like factor 14	KLF14	1.39357	0	1.73212
1552816_PM_at	nucleoredoxin-like 2	NXNL2	1.43035	0	0.663255
1552818_PM_a_at	bombesin-like receptor 3	BRS3	0.635735	0	0.0806922
1552819_PM_at	long intergenic non-protein coding RNA 205	LINC00205	1.91684	0.287862	1.73856
1552822_PM_at	thioredoxin-related transmembrane protein 3	TMX3	0.448517	0	0.345426
1552825_PM_at	zinc finger protein 396	ZNF396	0.824606	0.525464	0.445866
1552826_PM_at	solute carrier family 26, member 7	SLC26A7	0.91562	1.30483	0.370624
1552827_PM_s_at	solute carrier family 26, member 7	SLC26A7	0.330432	0.487619	0.15221
1552828_PM_at	sorting nexin 18	SNX18	0.588238	1.45594	0.0333071
1552829_PM_at	---	---	0.139658	1.21688	0.187113
1552830_PM_at	F-box protein 39	FBXO39	0.797403	0	0.848684
1552833_PM_at	UDP-GlcNAc:betaGal beta-1,3-N-acetylglucosaminyltransferase 6 (core 3 synthase)	B3GNT6	0.30613	0	0.430197
1552834_PM_at	UDP-GlcNAc:betaGal beta-1,3-N-acetylglucosaminyltransferase 6 (core 3 synthase)	B3GNT6	0.987471	1.32837	1.00769
1552835_PM_at	DENN/MADD domain containing 1B	DENND1B	0.587065	0.36981	0.0168281
1552836_PM_at	zinc finger protein 619	ZNF619	0.897604	1.06872	0.630859
1552837_PM_at	intestinal cell (MAK-like) kinase	ICK	1.43248	0.474684	0.955685
1552839_PM_at	family with sequence similarity 71, member D	FAM71D	0.99567	0.63791	1.13363
1552841_PM_s_at	BCL2-like 14 (apoptosis facilitator)	BCL2L14	1.09544	0	1.33526
1552842_PM_at	heparan sulfate 6-O-sulfotransferase 3	HS6ST3	0.388863	0	0.246419
1552843_PM_at	solute carrier family 26 (sulfate transporter), member 1	SLC26A1	1.00625	0	0.567056
1552845_PM_at	claudin 15	CLDN15	0.64507	1.01592	0.32938
1552846_PM_s_at	RAB42, member RAS oncogene family	RAB42	0.824437	0.565726	0.797639
1552848_PM_a_at	patched domain containing 1	PTCHD1	0.428443	0.710695	0.329456
1552849_PM_at	meiosis 1 associated protein	M1AP	1.4674	0	1.24618
1552851_PM_at	zinc finger and SCAN domain containing 4	ZSCAN4	0.970385	0.80987	1.43918
1552852_PM_a_at	zinc finger and SCAN domain containing 4	ZSCAN4	0.90605	1.0164	0.822131
1552853_PM_at	von Willebrand factor A domain containing 5B1	VWA5B1	0.747924	1.17892	1.1579
1552854_PM_a_at	von Willebrand factor A domain containing 5B1	VWA5B1	1.02309	1.805	0.996816
1552856_PM_at	long intergenic non-protein coding RNA 311	LINC00311	0.477838	0	0.0142836
1552857_PM_a_at	5-hydroxytryptamine (serotonin) receptor 6, G protein-coupled	HTR6	0.863637	1.21488	0.906903
1552858_PM_at	melanoma antigen family B, 6	MAGEB6	1.4228	0.308766	0.296211
1552860_PM_at	RNA polymerase II transcription factor SIII subunit A3-like /// RNA polymerase II transcription factor SIII subunit A3-like /// RNA polymerase II transcription factor SIII subunit A3-like /// transcription elongation factor B polypeptide 3C (elongin A3) /// transcription elongation factor B polypeptide 3C-like /// transcription elongation factor B polypeptide 3C-like 2	LOC101060457 /// LOC101060464 /// LOC101060468 /// TCEB3C /// TCEB3CL /// TCEB3CL2	0.663369	0.236953	0.65399
1552862_PM_at	RUSC1 antisense RNA 1	RUSC1-AS1	1.07453	0.984898	0.772178
1552863_PM_a_at	calcium channel, voltage-dependent, gamma subunit 6	CACNG6	0.725319	0.608274	1.21027
1552865_PM_a_at	intermediate filament tail domain containing 1	IFLTD1	0.665219	1.47137	0.0198882
1552867_PM_at	---	---	0.951888	0.375477	1.3494
1552868_PM_at	CIRBP antisense RNA 1	CIRBP-AS1	0.191827	0	0.219534
1552870_PM_s_at	axonemal dynein light chain domain containing 1	AXDND1	1.67179	0.274236	2.09788
1552872_PM_at	ASMTL antisense RNA 1	ASMTL-AS1	0.419775	0	0.846723
1552873_PM_s_at	ASMTL antisense RNA 1	ASMTL-AS1	1.40296	1.36343	0.486113
1552875_PM_a_at	CD200 receptor 1	CD200R1	0.530244	0.26862	1.16621
1552876_PM_at	long intergenic non-protein coding RNA 334	LINC00334	0.774018	0.492974	1.09275
1552877_PM_s_at	long intergenic non-protein coding RNA 334	LINC00334	0.815666	0.79623	0.915674
1552878_PM_at	atonal homolog 7 (Drosophila)	ATOH7	1.50302	0	1.49081
1552879_PM_a_at	atonal homolog 7 (Drosophila)	ATOH7	1.07231	0	0.495574
1552880_PM_at	SEC16 homolog B (S. cerevisiae)	SEC16B	0.519598	0	0.138848
1552882_PM_a_at	APC membrane recruitment protein 1	AMER1	1.60941	1.23985	1.34433
1552884_PM_at	NK6 homeobox 3	NKX6-3	0.410621	0	0.495954
1552885_PM_a_at	NK6 homeobox 3	NKX6-3	0.860007	0	1.15992
1552887_PM_at	thymus, brain and testes associated	TBATA	0.838989	1.08472	0.605099
1552889_PM_a_at	exocyst complex component 3-like 2	EXOC3L2	0.417826	1.51185	0.491931
1552890_PM_a_at	calcium binding protein 4	CABP4	0.623931	0	1.00699
1552892_PM_at	tumor necrosis factor receptor superfamily, member 13C	TNFRSF13C	1.2067	1.12624	1.3373
1552893_PM_at	calcium/calmodulin-dependent protein kinase II inhibitor 2	CAMK2N2	1.30822	0	0.944643
1552895_PM_a_at	ankyrin repeat domain 30B pseudogene 2	ANKRD30BP2	0.620746	0	0.674604
1552897_PM_a_at	potassium voltage-gated channel, subfamily G, member 3	KCNG3	0.739877	0	0.549753
1552898_PM_a_at	potassium voltage-gated channel, subfamily G, member 3	KCNG3	0.782235	0.16839	0.363229
1552899_PM_at	uncharacterized protein MGC34034	MGC34034	1.77825	0.896107	1.72594
1552900_PM_a_at	uncharacterized protein MGC34034	MGC34034	0.797964	1.42516	0.8089
1552902_PM_a_at	forkhead box P2	FOXP2	1.68104	0.673475	1.73924
1552903_PM_at	beta-1,4-N-acetyl-galactosaminyl transferase 2	B4GALNT2	0.709072	0	0.0226816
1552904_PM_at	neuropilin (NRP) and tolloid (TLL)-like 1	NETO1	0.680969	0	0.0402456
1552906_PM_at	fragile X mental retardation 1 neighbor	FMR1NB	1.90352	0.838974	1.86986
1552908_PM_at	germinal center-associated, signaling and motility-like	GCSAML	0.904118	0.509807	0.142194
1552910_PM_at	sialic acid binding Ig-like lectin 11	SIGLEC11	1.47115	1.48078	1.7918
1552911_PM_at	sialic acid binding Ig-like lectin 11	SIGLEC11	1.47991	1.61008	0.98874
1552912_PM_a_at	interleukin 23 receptor	IL23R	0.265212	1.09063	0.733576
1552913_PM_at	melanoma antigen family B, 18	MAGEB18	0.462074	0.632475	0.23955
1552914_PM_a_at	CD276 molecule	CD276	1.44741	0.40795	1.23194
1552915_PM_at	interferon, lambda 2	IFNL2	0.895236	0.318803	1.06
1552917_PM_at	interferon, lambda 1	IFNL1	1.02549	0	1.23527
1552919_PM_at	chromosome 4 open reading frame 36	C4orf36	0.21606	1.62861	0.426227
1552921_PM_a_at	fidgetin-like 1	FIGNL1	0.479467	1.61505	0.891699
1552922_PM_at	regulating synaptic membrane exocytosis 1	RIMS1	1.20244	0	1.06405
1552923_PM_a_at	phosphatidylinositol transfer protein, membrane-associated 2	PITPNM2	0.572773	0.768059	0.285061
1552924_PM_a_at	phosphatidylinositol transfer protein, membrane-associated 2	PITPNM2	0.488394	0	0.508612
1552925_PM_at	protocadherin 10	PCDH10	0.204797	2.78627	0.509762
1552927_PM_at	TGF-beta activated kinase 1/MAP3K7 binding protein 3	TAB3	1.03876	1.32433	0.838975
1552928_PM_s_at	TGF-beta activated kinase 1/MAP3K7 binding protein 3	TAB3	0.719584	1.00985	1.44039
1552929_PM_at	G protein-coupled receptor kinase 7	GRK7	0.689642	0.532129	0.097841
1552930_PM_at	membrane metallo-endopeptidase-like 1	MMEL1	0.87608	0	0.786542
1552931_PM_a_at	phosphodiesterase 8A	PDE8A	0.20369	0.831984	0.776555
1552932_PM_at	NLR family, pyrin domain containing 6	NLRP6	0.308226	0	0.77663
1552933_PM_at	AKNA domain containing 1	AKNAD1	1.20674	0	1.35573
1552935_PM_at	zinc finger, CCHC domain containing 5	ZCCHC5	0.767727	1.19634	0.532094
1552937_PM_s_at	ATR interacting protein	ATRIP	1.86177	0	2.27468
1552938_PM_at	Zic family member 5	ZIC5	1.20831	1.25378	0.999628
1552939_PM_at	angiopoietin 1	ANGPT1	1.09305	0	0.0528926
1552940_PM_at	transmembrane epididymal protein 1	TEDDM1	0.430467	0	0.209058
1552942_PM_at	uncharacterized LOC149373	LOC149373	0.585223	1.17051	0.666151
1552943_PM_at	gamma-aminobutyric acid (GABA) A receptor, gamma 1	GABRG1	0.112561	1.47299	0.474076
1552944_PM_a_at	pannexin 2	PANX2	1.09562	0	0.80131
1552946_PM_at	zinc finger protein 114	ZNF114	1.11278	0	1.56451
1552947_PM_x_at	zinc finger protein 114	ZNF114	1.52161	0.767915	1.72444
1552948_PM_at	coiled-coil domain containing 27	CCDC27	0.752971	0.183585	0.10111
1552950_PM_at	chromosome 15 open reading frame 26	C15orf26	1.27431	0.403442	1.34778
1552952_PM_at	RNA binding motif protein, Y-linked, family 2, member F pseudogene	RBMY2FP	1.15175	0.624538	1.38653
1552953_PM_a_at	neuronal differentiation 2	NEUROD2	0.678043	0.625573	0.323314
1552954_PM_at	chromosome 5 open reading frame 17	C5orf17	0.155432	0.939048	0.343007
1552955_PM_at	long intergenic non-protein coding RNA 208	LINC00208	1.08881	0.745493	1.56506
1552957_PM_at	dynein, axonemal, heavy chain 6	DNAH6	1.47938	0	1.42572
1552960_PM_at	leucine rich repeat containing 15	LRRC15	0.327885	1.05192	0.354047
1552961_PM_at	NULL /// NULL	OTTHUMG00000165011 /// RP11-85I17.2	0.338555	1.60009	0.343586
1552964_PM_at	tetratricopeptide repeat domain 40	TTC40	0.826783	0.485877	0.901411
1552965_PM_a_at	UDP-GlcNAc:betaGal beta-1,3-N-acetylglucosaminyltransferase 7	B3GNT7	1.46513	0	1.50726
1552967_PM_at	zinc finger protein 645	ZNF645	0.697536	2.08093	0.582422
1552969_PM_a_at	zinc finger, MYM-type 6	ZMYM6	0.23933	1.52748	0.024209
1552970_PM_s_at	zinc finger, MYM-type 6	ZMYM6	0.19514	0.348233	0.0421936
1552971_PM_at	sarcoglycan, zeta	SGCZ	1.42047	0	1.49137
1552972_PM_at	uncharacterized LOC100507431	LOC100507431	0.219225	0.257706	0.518998
1552973_PM_at	wingless-type MMTV integration site family, member 9B	WNT9B	1.44842	1.26014	1.01618
1552974_PM_at	---	---	0.702479	0.842481	0.754634
1552975_PM_x_at	---	---	1.11155	0.841559	1.28363
1552976_PM_at	---	---	0.218699	0.860576	0.124773
1552977_PM_a_at	canopy 3 homolog (zebrafish)	CNPY3	1.1485	0.608171	1.63746
1552978_PM_a_at	secretory carrier membrane protein 1	SCAMP1	0.785985	0.408132	0.324651
1552979_PM_at	long intergenic non-protein coding RNA 471	LINC00471	0.501147	0.418076	0.137248
1552980_PM_at	hyaluronan synthase 3	HAS3	1.21052	1.71307	1.62737
1552982_PM_a_at	fibroblast growth factor 4	FGF4	1.47753	0.675067	2.0747
1552985_PM_at	solute carrier family 30 (zinc transporter), member 8	SLC30A8	0.620139	0.414501	0.0752096
1552986_PM_at	uncharacterized protein BC008131	LOC142937	0.149319	0	0.307623
1552987_PM_a_at	uncharacterized locus MGC42157	MGC42157	0.263325	0.877782	0.0391904
1552988_PM_at	chromosome 11 open reading frame 65	C11orf65	0.89742	1.0298	0.276195
1552990_PM_at	family with sequence similarity 71, member E2	FAM71E2	0.65583	0	0.0337014
1552991_PM_at	olfactory receptor, family 5, subfamily P, member 2	OR5P2	0.441319	0.550928	0.486115
1552993_PM_at	DPY30 domain containing 1	DYDC1	0.266431	0.864737	0.0481703
1552995_PM_at	interleukin 27	IL27	1.3145	1.15538	1.39075
1552997_PM_a_at	IQ motif containing F1	IQCF1	1.2207	0.295614	0.736449
1552998_PM_at	defensin, beta 125	DEFB125	0.551393	0	0.503642
1552999_PM_a_at	WAP four-disulfide core domain 10B	WFDC10B	0.959033	0	0.828261
1553002_PM_at	defensin, beta 105A /// defensin, beta 105B	DEFB105A /// DEFB105B	1.08481	0	1.21708
1553003_PM_at	polycystic kidney and hepatic disease 1 (autosomal recessive)	PKHD1	1.18197	0.909667	0.79737
1553004_PM_at	polycystic kidney disease 1 like 1	PKD1L1	0.828507	0	1.25953
1553006_PM_at	G protein-coupled receptor 112	GPR112	0.965681	1.00147	0.694958
1553007_PM_a_at	teneurin transmembrane protein 1	TENM1	1.10838	0	0.625818
1553009_PM_s_at	exonuclease GOR-like /// exonuclease GOR-like /// REX1, RNA exonuclease 1 homolog (S. cerevisiae)-like 1	LOC100288562 /// LOC101060540 /// REXO1L1	0.285816	0	0.568585
1553011_PM_at	TAF1 RNA polymerase II, TATA box binding protein (TBP)-associated factor, 210kDa-like	TAF1L	0.42036	0	0.50576
1553013_PM_at	contactin associated protein-like 5	CNTNAP5	0.774746	0	0.942312
1553015_PM_a_at	RecQ protein-like 4	RECQL4	1.13456	0.434551	0.833822
1553016_PM_at	G protein-coupled receptor 113	GPR113	0.871786	1.24795	0.938601
1553019_PM_at	transmembrane channel-like 2	TMC2	1.05312	1.10634	1.12777
1553020_PM_at	Smith-Magenis syndrome chromosome region, candidate 5 (non-protein coding)	SMCR5	1.05273	0.932394	1.07013
1553021_PM_s_at	bicaudal D homolog 2 (Drosophila)	BICD2	0.965415	0.90889	1.2118
1553022_PM_at	zinc finger, imprinted 3	ZIM3	0.759362	0.898624	1.10361
1553023_PM_a_at	NADPH oxidase, EF-hand calcium binding domain 5	NOX5	1.10108	0.391184	1.38355
1553024_PM_at	DAOA antisense RNA 1	DAOA-AS1	0.409704	0.883225	0.674774
1553025_PM_at	G protein-coupled receptor 126	GPR126	0.759976	0.963097	0.0275905
1553027_PM_a_at	kelch-like family member 4	KLHL4	0.504243	0.756264	0.966295
1553028_PM_at	G protein-coupled receptor 156	GPR156	0.816362	0	1.35435
1553030_PM_a_at	sulfite oxidase	SUOX	1.37957	0	0.946262
1553031_PM_at	G protein-coupled receptor 115	GPR115	0.675849	0.229157	0.600575
1553032_PM_at	interleukin 31 receptor A	IL31RA	1.83675	0.15929	1.93852
1553033_PM_at	synaptotagmin-like 5	SYTL5	0.795	0.855855	0.747219
1553034_PM_at	serologically defined colon cancer antigen 8	SDCCAG8	1.39417	1.91863	2.12229
1553036_PM_at	G protein-coupled receptor 111	GPR111	0.378408	0.810984	0.756785
1553037_PM_a_at	synapsin II	SYN2	0.555927	0.446938	0.897942
1553039_PM_a_at	ankyrin repeat and SOCS box containing 10	ASB10	1.44894	0.740052	1.69367
1553041_PM_at	5-hydroxytryptamine (serotonin) receptor 3C, ionotropic	HTR3C	0.965466	0.95439	0.858592
1553042_PM_a_at	nuclear factor of kappa light polypeptide gene enhancer in B-cells inhibitor, delta	NFKBID	1.08099	1.00092	0.710974
1553043_PM_a_at	CD300 molecule-like family member f	CD300LF	0.996865	0.873481	1.38445
1553044_PM_at	gap junction protein, alpha 10, 62kDa	GJA10	1.49632	0.453832	1.84938
1553045_PM_at	wingless-type MMTV integration site family, member 9A	WNT9A	1.14217	0	0.794729
1553046_PM_s_at	galactose-3-O-sulfotransferase 2	GAL3ST2	0.937252	1.2623	0.834283
1553047_PM_at	phosphatidylinositol-5-phosphate 4-kinase, type II, beta	PIP4K2B	1.81189	0.791729	2.34931
1553048_PM_a_at	phosphatidylinositol-5-phosphate 4-kinase, type II, beta	PIP4K2B	0.55383	0	1.10723
1553051_PM_s_at	outer dense fiber of sperm tails 3	ODF3	1.33358	1.38913	0.756408
1553052_PM_at	WAP four-disulfide core domain 13	WFDC13	1.19034	0.222112	1.02252
1553053_PM_at	long intergenic non-protein coding RNA 521	LINC00521	1.24358	1.02572	0.685839
1553055_PM_a_at	schlafen family member 5	SLFN5	0.798932	0	0.830915
1553057_PM_at	serpin peptidase inhibitor, clade B (ovalbumin), member 12	SERPINB12	1.11575	0.791599	0.552721
1553058_PM_at	GIPC PDZ domain containing family, member 3	GIPC3	0.695028	0.424767	0.654201
1553059_PM_at	peptidoglycan recognition protein 3	PGLYRP3	0.867502	1.42657	1.41114
1553060_PM_at	protein serine kinase H2	PSKH2	0.113691	0	0.218407
1553061_PM_at	olfactory receptor, family 6, subfamily W, member 1 pseudogene	OR6W1P	0.563705	0.437716	0.260016
1553062_PM_at	monoacylglycerol O-acyltransferase 1	MOGAT1	0.926184	1.17975	0.0181422
1553063_PM_at	G protein-coupled receptor 78	GPR78	1.11694	0	1.09441
1553064_PM_at	H1 histone family, member O, oocyte-specific	H1FOO	0.434073	0.919656	0.189073
1553066_PM_at	trace amine associated receptor 9 (gene/pseudogene)	TAAR9	0.470541	1.07923	1.16995
1553067_PM_a_at	gonadotropin-releasing hormone (type 2) receptor 2	GNRHR2	1.3304	0.159843	0.925823
1553069_PM_at	BRWD1 intronic transcript 2 (non-protein coding)	BRWD1-IT2	0.814138	1.60185	0.194794
1553070_PM_a_at	myozenin 3	MYOZ3	0.977888	1.25883	1.14699
1553071_PM_a_at	myozenin 3	MYOZ3	0.998863	0	0.36149
1553072_PM_at	BCL2/adenovirus E1B 19kD interacting protein like	BNIPL	1.1195	0.447407	0.522843
1553074_PM_at	ankyrin repeat and SOCS box containing 11	ASB11	0.958219	0	1.45729
1553075_PM_a_at	orofacial cleft 1 candidate 1	OFCC1	1.03478	0.696168	1.21722
1553076_PM_at	orofacial cleft 1 candidate 1	OFCC1	1.20224	0.514759	0.462583
1553077_PM_at	short chain dehydrogenase/reductase family 9C, member 7	SDR9C7	1.20981	0.704301	0.667018
1553078_PM_at	olfactory receptor, family 5, subfamily P, member 3	OR5P3	1.31237	0	1.34373
1553079_PM_at	tripartite motif containing 40	TRIM40	0.774016	1.88756	0.712075
1553080_PM_at	casein alpha s2-like A, pseudogene	CSN1S2AP	0.320873	0	0.17169
1553081_PM_at	WAP four-disulfide core domain 12	WFDC12	0.979026	0	1.18348
1553082_PM_at	crystallin, gamma N	CRYGN	0.721993	0	0.676118
1553083_PM_at	---	---	0.82127	0.46404	0.880249
1553084_PM_at	StAR-related lipid transfer (START) domain containing 6	STARD6	1.16721	0	0.565216
1553086_PM_at	chromosome 11 open reading frame 40	C11orf40	0.848642	0.677735	0.861708
1553087_PM_at	chromosome 18 open reading frame 12	C18orf12	0.611478	0	0.631895
1553088_PM_a_at	BCL2-like 11 (apoptosis facilitator)	BCL2L11	0.932141	0	1.23092
1553089_PM_a_at	WAP four-disulfide core domain 2	WFDC2	0.792573	2.21345	1.00873
1553093_PM_a_at	defensin, beta 119	DEFB119	0.841332	0	1.04022
1553094_PM_at	uncharacterized LOC729220 /// tachykinin 4 (hemokinin)	FLJ45513 /// TAC4	0.847992	1.71974	0.956142
1553096_PM_s_at	BCL2-like 11 (apoptosis facilitator)	BCL2L11	0.413221	0.820549	0.0484695
1553099_PM_at	tigger transposable element derived 1	TIGD1	1.39916	1.02013	0.260532
1553101_PM_a_at	alkB, alkylation repair homolog 5 (E. coli)	ALKBH5	0.663003	1.81661	0.963562
1553102_PM_a_at	coiled-coil domain containing 69	CCDC69	0.244639	2.33003	0.126118
1553103_PM_at	nuclear transcription factor, X-box binding 1	NFX1	0.493105	0	0.0062453
1553105_PM_s_at	desmoglein 2	DSG2	1.28563	0.637942	0.798706
1553106_PM_at	chromosome 5 open reading frame 24	C5orf24	0.973033	0.718705	0.680669
1553107_PM_s_at	chromosome 5 open reading frame 24	C5orf24	0.362484	1.22568	0.636603
1553108_PM_at	chromosome 5 open reading frame 24	C5orf24	1.09044	0	0.661026
1553111_PM_a_at	kelch repeat and BTB (POZ) domain containing 6	KBTBD6	0.824824	0.891427	1.03133
1553112_PM_s_at	cyclin-dependent kinase 8	CDK8	0.50351	1.15493	0.307867
1553113_PM_s_at	cyclin-dependent kinase 8	CDK8	1.15891	0.218836	0.921425
1553114_PM_a_at	protein tyrosine kinase 6	PTK6	0.631168	0.674132	0.642316
1553115_PM_at	naked cuticle homolog 1 (Drosophila)	NKD1	0.828029	1.22953	0.7045
1553117_PM_a_at	serine/threonine kinase 38	STK38	1.00094	0	1.25088
1553118_PM_at	thioesterase superfamily member 4	THEM4	1.24907	1.58058	0.297774
1553120_PM_at	claspin	CLSPN	1.29973	1.27527	0.112515
1553122_PM_s_at	RB-associated KRAB zinc finger /// RBAK-RBAKDN readthrough /// RBAK downstream neighbor (non-protein coding)	RBAK /// RBAK-RBAKDN /// RBAKDN	1.65829	1.90824	2.25563
1553123_PM_at	WD repeat domain 62	WDR62	0.991266	0.388173	0.411789
1553125_PM_x_at	WD repeat domain 62	WDR62	1.46353	0	1.79433
1553126_PM_a_at	solute carrier family 39 (zinc transporter), member 12	SLC39A12	1.34521	1.08505	1.8284
1553127_PM_a_at	ring finger protein 168, E3 ubiquitin protein ligase	RNF168	0.602495	1.12479	0.582621
1553129_PM_at	sushi, von Willebrand factor type A, EGF and pentraxin domain containing 1	SVEP1	1.03255	1.32166	1.38694
1553130_PM_at	potassium channel tetramerisation domain containing 5 pseudogene	LOC652276	0.896284	1.90703	0.17131
1553131_PM_a_at	GATA binding protein 4	GATA4	0.225842	0	0.299107
1553132_PM_a_at	tandem C2 domains, nuclear	TC2N	1.24162	0	1.27609
1553133_PM_at	chromosome 9 open reading frame 72	C9orf72	1.35353	1.7464	0.208231
1553134_PM_s_at	chromosome 9 open reading frame 72	C9orf72	1.59604	1.88403	1.13623
1553136_PM_at	potassium channel tetramerisation domain containing 18	KCTD18	0.733159	2.1808	0.611847
1553137_PM_s_at	Kruppel-like factor 11	KLF11	0.122418	1.08812	0.306479
1553138_PM_a_at	ankyrin repeat and LEM domain containing 1	ANKLE1	0.669367	0	0.233462
1553139_PM_s_at	plexin A3	PLXNA3	1.23616	0.824348	0.927153
1553140_PM_at	pelota homolog (Drosophila)	PELO	1.35938	0.34694	1.60816
1553141_PM_at	laccase (multicopper oxidoreductase) domain containing 1	LACC1	0.882815	0	0.730557
1553142_PM_at	laccase (multicopper oxidoreductase) domain containing 1	LACC1	1.18193	0.909594	0.223023
1553145_PM_at	TAPT1 antisense RNA 1 (head to head)	TAPT1-AS1	0.435994	0	0.954022
1553146_PM_at	chromosome 3 open reading frame 30	C3orf30	1.12644	0.512009	0.932367
1553147_PM_at	RAN binding protein 3-like	RANBP3L	0.921411	0	0.400855
1553148_PM_a_at	sorting nexin 13	SNX13	1.12225	0	0.595185
1553150_PM_at	lysine (K)-specific demethylase 1B	KDM1B	1.50071	0.407517	2.08734
1553151_PM_at	ATPase, H+ transporting, lysosomal 38kDa, V0 subunit d2	ATP6V0D2	0.72351	0.587293	0.699832
1553153_PM_at	ATPase, H+ transporting, lysosomal 38kDa, V0 subunit d2	ATP6V0D2	0.738342	0.432056	0.336019
1553155_PM_x_at	ATPase, H+ transporting, lysosomal 38kDa, V0 subunit d2	ATP6V0D2	0.629856	0	0.712978
1553156_PM_at	LIM homeobox 4	LHX4	1.14079	1.97395	1.62204
1553157_PM_at	LIM homeobox 4	LHX4	0.281895	0.733248	0.295587
1553158_PM_at	centrosomal protein 19kDa	CEP19	1.2839	0.459158	0.165819
1553159_PM_at	dynein, axonemal, heavy chain 11	DNAH11	0.298847	0.439503	0.0649187
1553162_PM_x_at	chromosome 19 open reading frame 55	C19orf55	0.51893	0	0.645568
1553163_PM_at	ADP-ribosylhydrolase like 1	ADPRHL1	0.520327	0.697529	0.0635214
1553165_PM_at	synergin, gamma	SYNRG	0.6009	0.604796	0.0495338
1553166_PM_at	cadherin 24, type 2	CDH24	0.552452	0.880764	0.482386
1553167_PM_a_at	Sep (O-phosphoserine) tRNA:Sec (selenocysteine) tRNA synthase	SEPSECS	1.25673	0.903771	1.27201
1553168_PM_at	glutamate receptor, ionotropic, kainate 5	GRIK5	1.3113	0	1.48026
1553169_PM_at	leucine rich repeat neuronal 4	LRRN4	0.0688324	0.487629	0.29594
1553171_PM_x_at	leucine rich repeat neuronal 4	LRRN4	0.34913	0	0.735432
1553172_PM_at	zinc finger protein 777	ZNF777	0.169416	0.944995	0.33847
1553174_PM_at	junctophilin 2	JPH2	1.74002	1.21935	1.72613
1553175_PM_s_at	phosphodiesterase 5A, cGMP-specific	PDE5A	1.321	0	0.68009
1553176_PM_at	SH2 domain containing 1B	SH2D1B	0.999146	0	0.50673
1553177_PM_at	SH2 domain containing 1B	SH2D1B	0.417634	0	0.119134
1553178_PM_a_at	somatostatin receptor 3	SSTR3	1.40719	0.729223	1.39748
1553179_PM_at	ADAM metallopeptidase with thrombospondin type 1 motif, 19	ADAMTS19	1.12762	0.570775	1.12851
1553180_PM_at	ADAM metallopeptidase with thrombospondin type 1 motif, 19	ADAMTS19	0.598561	0	0.885548
1553181_PM_at	DEAD (Asp-Glu-Ala-Asp) box polypeptide 31	DDX31	0.798589	0.533246	0.105809
1553183_PM_at	uromodulin-like 1	UMODL1	0.903995	0.3301	0.0867376
1553185_PM_at	RAS and EF-hand domain containing	RASEF	0.31748	0	0.593723
1553186_PM_x_at	RAS and EF-hand domain containing	RASEF	0.178781	0	0.252871
1553188_PM_s_at	par-3 partitioning defective 3 homolog B (C. elegans)	PARD3B	0.67066	1.49316	0.143496
1553190_PM_s_at	par-3 partitioning defective 3 homolog B (C. elegans)	PARD3B	0.766213	0.578396	0.394411
1553191_PM_at	dystonin	DST	0.284782	0.56712	0.834069
1553192_PM_at	zinc finger protein 441	ZNF441	0.466606	1.34217	0.332334
1553193_PM_at	zinc finger protein 441	ZNF441	1.37685	1.80966	0.761255
1553194_PM_at	neuronal growth regulator 1	NEGR1	0.534524	0.632036	1.0378
1553196_PM_a_at	Fc receptor-like 3	FCRL3	0.953146	1.57541	1.21707
1553197_PM_at	DDB1 and CUL4 associated factor 4-like 2	DCAF4L2	0.827479	0.680711	0.714048
1553199_PM_at	DDB1 and CUL4 associated factor 4-like 2	DCAF4L2	1.53012	1.44087	1.08279
1553202_PM_at	storkhead box 1	STOX1	0.494872	0	0.497302
1553204_PM_at	C20orf166 antisense RNA 1	C20orf166-AS1	1.97366	1.30332	2.29751
1553205_PM_at	C20orf166 antisense RNA 1	C20orf166-AS1	0.943093	0.463348	1.13771
1553207_PM_at	ADP-ribosylation factor-like 10	ARL10	0.602601	0	1.15254
1553208_PM_s_at	---	---	0.942576	2.80256	0.918767
1553209_PM_at	ring finger protein, transmembrane 2	RNFT2	0.701866	1.45214	0.254611
1553211_PM_at	ankyrin-repeat and fibronectin type III domain containing 1	ANKFN1	1.20761	0.291464	0.776062
1553212_PM_at	keratin 78	KRT78	0.916642	1.16338	0.975099
1553213_PM_a_at	keratin 78	KRT78	0.421403	0.135107	0.139295
1553214_PM_a_at	coiled-coil domain containing 7	CCDC7	0.150748	0	0.363436
1553215_PM_s_at	coiled-coil domain containing 7	CCDC7	1.1174	1.95704	1.26577
1553216_PM_at	zinc finger protein 41	ZNF41	0.62312	0.924699	0.442334
1553217_PM_s_at	zinc finger protein 41	ZNF41	1.08611	0	0.381221
1553218_PM_a_at	zinc finger protein 512	ZNF512	0.403146	1.02955	0.454781
1553219_PM_a_at	Alport syndrome, mental retardation, midface hypoplasia and elliptocytosis chromosomal region gene 1	AMMECR1	1.04614	0	1.20567
1553220_PM_at	family with sequence similarity 117, member B	FAM117B	0.673416	0.807271	0.783215
1553221_PM_at	zinc finger protein 583	ZNF583	1.55561	0.623113	1.63711
1553222_PM_at	oxoeicosanoid (OXE) receptor 1	OXER1	0.552264	0.623268	0.514114
1553224_PM_at	leucine zipper protein 1	LUZP1	1.10738	0	0.832277
1553225_PM_s_at	zinc finger protein 75D	ZNF75D	0.26723	0.850171	1.00962
1553226_PM_at	long intergenic non-protein coding RNA 52	LINC00052	0.129909	0.849538	0.0334231
1553227_PM_s_at	bromodomain and WD repeat domain containing 1	BRWD1	1.25456	0.952791	1.52752
1553228_PM_at	coiled-coil domain containing 89	CCDC89	0.800685	0	0.0492601
1553229_PM_at	zinc finger protein 572	ZNF572	0.584643	0.266054	0.476005
1553232_PM_at	regulator of microtubule dynamics 2	RMDN2	0.233575	0	0.157755
1553234_PM_at	ADAM metallopeptidase with thrombospondin type 1 motif, 18	ADAMTS18	0.632751	0	1.37411
1553235_PM_at	protocadherin alpha subfamily C, 1	PCDHAC1	1.35592	0.939399	0.408005
1553237_PM_x_at	protocadherin alpha subfamily C, 1	PCDHAC1	0.798843	0.652614	0.0792537
1553238_PM_a_at	homeodomain interacting protein kinase 4	HIPK4	1.41054	1.04816	1.19727
1553239_PM_at	family with sequence similarity 124A	FAM124A	1.59177	0.962838	1.7176
1553241_PM_at	Na+/K+ transporting ATPase interacting 3	NKAIN3	0.920982	0.299914	1.24741
1553243_PM_at	inter-alpha-trypsin inhibitor heavy chain family, member 5	ITIH5	1.50991	0.909018	1.66182
1553244_PM_at	Fanconi anemia, complementation group B	FANCB	1.0164	0.642172	0.850648
1553246_PM_a_at	protein kinase-like protein SgK196	SGK196	0.910483	0	0.816936
1553247_PM_a_at	zinc finger protein 709	ZNF709	1.32044	0	1.71241
1553248_PM_at	coiled-coil domain containing 57	CCDC57	1.59077	0	1.05909
1553249_PM_at	structural maintenance of chromosomes 1B	SMC1B	0.798173	0.0249019	1.1396
1553252_PM_a_at	bromodomain and WD repeat domain containing 3	BRWD3	1.05157	0.839129	1.44072
1553253_PM_at	ankyrin repeat and SOCS box containing 16	ASB16	0.436465	1.18931	0.358032
1553254_PM_at	melanoma antigen family E, 2	MAGEE2	0.607857	0.528993	0.623848
1553255_PM_at	endogenous retrovirus group V, member 1	ERVV-1	0.585781	0.747511	0.0683711
1553257_PM_at	galactose-3-O-sulfotransferase 3	GAL3ST3	1.60978	0	1.79065
1553258_PM_at	uncharacterized protein FLJ30679	FLJ30679	0.460886	1.93021	0.424921
1553260_PM_s_at	amyotrophic lateral sclerosis 2 (juvenile) chromosome region, candidate 11	ALS2CR11	0.949191	1.26251	0.626788
1553261_PM_x_at	amyotrophic lateral sclerosis 2 (juvenile) chromosome region, candidate 11	ALS2CR11	0.710278	0	0.236308
1553262_PM_a_at	urotensin 2 receptor	UTS2R	1.4488	0	1.43417
1553263_PM_at	Usher syndrome 1G (autosomal recessive)	USH1G	1.40365	0	1.83751
1553264_PM_a_at	synapsin I	SYN1	1.03216	0.767966	0.938094
1553265_PM_at	solute carrier family 23 (nucleobase transporters), member 3	SLC23A3	0.766768	0.879238	0.503879
1553266_PM_at	CCR4-NOT transcription complex, subunit 6-like	CNOT6L	1.49984	0.602696	1.10969
1553267_PM_a_at	CCR4-NOT transcription complex, subunit 6-like	CNOT6L	0.822592	0	0.295948
1553268_PM_at	rhomboid, veinlet-like 3 (Drosophila)	RHBDL3	1.18268	0.860299	0.29953
1553269_PM_at	zinc finger protein 718	ZNF718	0.585222	0.86708	0.211852
1553271_PM_at	DIP2 disco-interacting protein 2 homolog B (Drosophila)	DIP2B	1.25588	0.93701	1.66397
1553272_PM_at	solute carrier family 36 (proton/amino acid symporter), member 1	SLC36A1	1.63901	0.292718	1.27374
1553274_PM_a_at	small nuclear ribonucleoprotein 48kDa (U11/U12)	SNRNP48	1.10814	1.13807	1.26809
1553275_PM_s_at	---	---	1.47998	0.667494	1.4188
1553276_PM_at	zinc finger protein 560	ZNF560	0.709196	0.925508	0.263687
1553277_PM_at	rotatin	RTTN	0.703071	0	0.261208
1553279_PM_at	butyrophilin-like 9	BTNL9	0.755079	1.32942	1.01621
1553280_PM_at	pseudouridylate synthase 10	PUS10	1.30404	1.41504	1.30804
1553281_PM_at	phosphatidylinositol-specific phospholipase C, X domain containing 2	PLCXD2	1.23741	1.42481	1.16912
1553282_PM_at	chromosome 21 open reading frame 128	C21orf128	1.51607	1.81007	1.13102
1553284_PM_s_at	leishmanolysin-like (metallopeptidase M8 family)	LMLN	0.516463	1.16267	0.581239
1553285_PM_s_at	RAD9 homolog B (S. pombe)	RAD9B	1.18751	0.548154	0.660581
1553286_PM_at	zinc finger protein 555	ZNF555	1.12772	1.87883	0.702355
1553288_PM_a_at	neuronal tyrosine-phosphorylated phosphoinositide-3-kinase adaptor 1	NYAP1	1.70209	1.34878	2.03699
1553292_PM_s_at	uncharacterized serine/threonine-protein kinase SgK494	SGK494	0.724856	1.18132	0.143193
1553293_PM_at	MAS-related GPR, member X3	MRGPRX3	0.732045	0	0.313513
1553295_PM_at	ATP-binding cassette, sub-family A (ABC1), member 13	ABCA13	0.241793	0	0.234341
1553296_PM_at	G protein-coupled receptor 128	GPR128	1.10914	0	0.978212
1553297_PM_a_at	colony stimulating factor 3 receptor (granulocyte)	CSF3R	0.708068	0.337358	0.962783
1553298_PM_at	chromosome 17 open reading frame 77	C17orf77	0.779771	1.1759	1.71369
1553299_PM_at	dual specificity phosphatase 5 pseudogene 1	DUSP5P1	0.581197	0.97433	0.197425
1553300_PM_a_at	diacylglycerol kinase, eta	DGKH	0.675584	0.948745	0.169332
1553301_PM_a_at	transmembrane protein 182	TMEM182	0.266813	0.76301	0.0877238
1553303_PM_at	chromosome 16 open reading frame 46	C16orf46	0.673983	1.7376	0.346721
1553304_PM_at	LSM14B, SCD6 homolog B (S. cerevisiae)	LSM14B	1.03898	0.829821	1.23299
1553306_PM_at	caspase 8, apoptosis-related cysteine peptidase	CASP8	1.5165	1.78991	1.69316
1553310_PM_at	phospholipase B1	PLB1	1.1809	0.175722	1.85024
1553311_PM_at	chromosome 20 open reading frame 197	C20orf197	0.752943	0.117502	0.318097
1553313_PM_s_at	solute carrier family 5 (sodium/myo-inositol cotransporter), member 3	SLC5A3	0.537322	0	0.106252
1553314_PM_a_at	kinesin family member 19	KIF19	0.813876	1.25026	1.0382
1553315_PM_at	schlafen-like 1	SLFNL1	0.296321	0	0.562461
1553316_PM_at	G protein-coupled receptor 82	GPR82	0.724267	0	0.93374
1553317_PM_s_at	G protein-coupled receptor 82	GPR82	0.434928	0.763761	0.946685
1553318_PM_at	RIB43A domain with coiled-coils 1	RIBC1	0.477736	0.929043	0.459199
1553319_PM_at	oxoglutarate (alpha-ketoglutarate) receptor 1	OXGR1	0.907884	0.364594	0.83977
1553320_PM_s_at	cell division cycle 14C	CDC14C	0.504496	0.485376	0.551233
1553321_PM_a_at	sulfotransferase family, cytosolic, 1C, member 4	SULT1C4	1.28554	0.885359	1.15154
1553322_PM_s_at	TEA domain family member 1 (SV40 transcriptional enhancer factor)	TEAD1	1.07117	0	0.648863
1553323_PM_a_at	cation channel, sperm associated 2 /// cation channel, sperm associated 2 pseudogene 1	CATSPER2 /// CATSPER2P1	0.280227	1.21187	0.0661454
1553325_PM_at	POU domain class 5, transcription factor 2	POU5F2	0.869473	1.73033	0.907677
1553326_PM_at	relaxin/insulin-like family peptide receptor 2	RXFP2	0.791356	1.7513	1.38216
1553327_PM_a_at	BEN domain containing 7	BEND7	0.883857	0	0.840065
1553328_PM_a_at	solute carrier family 18 (vesicular monoamine), member 2	SLC18A2	1.79968	0	0.972619
1553329_PM_at	serine-rich single-pass membrane protein 1	SSMEM1	1.69784	0.326502	1.66497
1553330_PM_at	serine-rich single-pass membrane protein 1	SSMEM1	1.69862	1.65049	1.73589
1553333_PM_at	mab-21-like 3 (C. elegans)	MAB21L3	0.800494	0.743742	0.444727
1553335_PM_x_at	uncharacterized LOC285696	LOC285696	1.94253	0.786085	2.41099
1553336_PM_a_at	mesoderm induction early response 1, family member 3	MIER3	0.60283	2.22566	1.3014
1553338_PM_at	SDE2 telomere maintenance homolog (S. pombe)	SDE2	1.45347	0	1.10695
1553340_PM_s_at	solute carrier family 35, member G3 /// solute carrier family 35, member G4 /// solute carrier family 35, member G5	SLC35G3 /// SLC35G4 /// SLC35G5	1.26392	1.68499	0.692128
1553341_PM_at	urocanate hydratase 1	UROC1	1.44418	0	1.81878
1553344_PM_at	protocadherin-related 15	PCDH15	0.370417	1.8717	0.288893
1553346_PM_a_at	trinucleotide repeat containing 6A	TNRC6A	0.913118	0	0.833401
1553347_PM_s_at	potassium voltage-gated channel, shaker-related subfamily, member 6	KCNA6	0.527518	2.1064	0.426407
1553348_PM_a_at	nuclear transcription factor, X-box binding 1	NFX1	0.349051	0	0.865525
1553349_PM_at	AT rich interactive domain 2 (ARID, RFX-like)	ARID2	0.495569	1.55009	0.672547
1553350_PM_at	APC membrane recruitment protein 3	AMER3	1.31464	0	1.72373
1553351_PM_at	OTU domain containing 7A	OTUD7A	0.524741	0	0.583933
1553352_PM_x_at	endogenous retrovirus group W, member 1	ERVW-1	0.516826	0	0.0955463
1553354_PM_a_at	uncharacterized LOC143153	FLJ31958	0.864089	0.831089	0.270169
1553355_PM_at	---	---	1.61108	0.197859	0.938548
1553356_PM_at	---	---	1.7072	0.607461	2.31312
1553357_PM_at	long intergenic non-protein coding RNA 889	LINC00889	1.23799	0.427321	1.39014
1553359_PM_at	F-box and leucine-rich repeat protein 18	FBXL18	1.65982	0	1.60526
1553361_PM_x_at	F-box and leucine-rich repeat protein 18	FBXL18	0.819616	0.394874	0.775504
1553362_PM_at	dynein, axonemal, heavy chain 6	DNAH6	1.24291	1.09298	1.50964
1553363_PM_at	chromosome 6 open reading frame 195	C6orf195	1.28094	1.15679	1.37375
1553364_PM_at	patatin-like phospholipase domain containing 1	PNPLA1	0.5866	1.06679	1.13862
1553365_PM_at	DEP domain containing 4	DEPDC4	0.723955	0.857036	0.869395
1553366_PM_s_at	ankyrin repeat domain 23 /// ankyrin repeat domain 39	ANKRD23 /// ANKRD39	0.604989	1.29691	0.835059
1553367_PM_a_at	cytochrome c oxidase subunit VIb polypeptide 2 (testis)	COX6B2	0.375974	0	0.399535
1553369_PM_at	family with sequence similarity 129, member C	FAM129C	1.21624	0.411537	1.43619
1553371_PM_at	EPH receptor A10	EPHA10	2.19196	0	2.44031
1553372_PM_at	---	---	1.12678	0	0.802694
1553373_PM_at	WD repeat domain 64	WDR64	1.32859	0.540455	0.444897
1553374_PM_at	uncharacterized protein PRO2949	PRO2949	1.20432	1.87818	0.82862
1553375_PM_at	BTB (POZ) domain containing 9	BTBD9	0.685665	1.19648	0.245895
1553376_PM_a_at	axonemal dynein light chain domain containing 1	AXDND1	0.388388	0	0.0959117
1553378_PM_a_at	chromosome 17 open reading frame 66	C17orf66	0.280616	1.36357	0.561419
1553380_PM_at	poly (ADP-ribose) polymerase family, member 15	PARP15	0.974608	2.12334	0.643884
1553383_PM_at	Rho GTPase activating protein 42	ARHGAP42	0.85686	0.779697	1.03426
1553385_PM_at	uncharacterized LOC84931	LOC84931	0.547334	0	0.127605
1553386_PM_at	major facilitator superfamily domain containing 2A	MFSD2A	0.241259	0.815005	0.935082
1553387_PM_at	ataxia telangiectasia mutated	ATM	1.33272	0.565163	1.43882
1553388_PM_at	family with sequence similarity 26, member D	FAM26D	0.822956	0	0.523165
1553389_PM_at	nephronophthisis 3 (adolescent)	NPHP3	0.766954	0.657767	0.937798
1553390_PM_at	autophagy related 9B	ATG9B	0.753616	0	0.47466
1553391_PM_at	chromosome X open reading frame 58	CXorf58	0.591593	0	1.12969
1553392_PM_at	EF-hand calcium binding domain 3	EFCAB3	0.537942	1.42608	0.690728
1553394_PM_a_at	transcription factor AP-2 beta (activating enhancer binding protein 2 beta)	TFAP2B	0.957734	0.601585	1.09858
1553395_PM_a_at	CD200 receptor 1	CD200R1	1.13063	0.378303	0.596666
1553396_PM_a_at	coiled-coil domain containing 13	CCDC13	1.09198	2.37978	1.12076
1553397_PM_at	coiled-coil domain containing 13	CCDC13	0.171097	0	0.445437
1553398_PM_at	---	---	0.960947	0.719952	0.703071
1553399_PM_a_at	CRHR1 intronic transcript 1 (non-protein coding) /// uncharacterized LOC401884	CRHR1-IT1 /// MGC57346	0.833416	0.425919	1.20847
1553400_PM_a_at	CRHR1 intronic transcript 1 (non-protein coding) /// uncharacterized LOC401884	CRHR1-IT1 /// MGC57346	0.702021	0	0.42297
1553401_PM_at	MAS-related GPR, member X1	MRGPRX1	1.75821	0	1.95202
1553402_PM_a_at	hemochromatosis	HFE	0.692517	1.19788	0.267192
1553403_PM_at	relaxin 3	RLN3	1.20937	0.697278	1.0874
1553405_PM_a_at	CUB and Sushi multiple domains 1	CSMD1	0.912543	0	0.888616
1553407_PM_at	microtubule-actin crosslinking factor 1	MACF1	1.11104	0	0.922907
1553409_PM_at	ADAM metallopeptidase with thrombospondin type 1 motif, 20	ADAMTS20	1.13982	0	0.697086
1553410_PM_a_at	ATP-binding cassette, sub-family C (CFTR/MRP), member 12	ABCC12	0.695601	0	0.0069282
1553411_PM_s_at	sal-like 3 (Drosophila)	SALL3	0.932225	0.265061	0.786912
1553412_PM_at	ATP/GTP binding protein-like 4	AGBL4	0.570463	0	0.431405
1553413_PM_at	uncharacterized FLJ13744	FLJ13744	1.04479	2.19041	0.453898
1553415_PM_at	solute carrier family 17 (sodium-dependent inorganic phosphate cotransporter), member 8	SLC17A8	0.321645	0.628251	0.411349
1553417_PM_at	chromosome 11 open reading frame 44	C11orf44	1.80441	0	1.87172
1553418_PM_a_at	contactin associated protein-like 5	CNTNAP5	0.635588	0.3067	0.549124
1553420_PM_at	SATB2 antisense RNA 1	SATB2-AS1	0.425916	1.54078	0.097003
1553422_PM_s_at	RNA binding protein, fox-1 homolog (C. elegans) 1	RBFOX1	0.883456	1.22302	0.424125
1553423_PM_a_at	schlafen family member 13	SLFN13	0.848273	0.376748	1.2615
1553424_PM_at	chromosome 12 open reading frame 40	C12orf40	0.984282	0.544374	0.963569
1553425_PM_at	WD repeat domain 65	WDR65	1.12128	0	1.16883
1553426_PM_at	chromosome 5 open reading frame 64	C5orf64	1.03353	0.230976	1.28887
1553427_PM_at	ADAM metallopeptidase with thrombospondin type 1 motif, 15	ADAMTS15	1.53007	0.273326	1.74928
1553428_PM_at	LY86 antisense RNA 1	LY86-AS1	1.5247	0.808989	1.57772
1553429_PM_at	uncharacterized protein FLJ31713	FLJ31713	1.25052	0.635799	1.30322
1553430_PM_a_at	EDAR-associated death domain	EDARADD	1.24026	0.485237	0.372005
1553432_PM_s_at	otoancorin-like /// otoancorin pseudogene /// otoancorin	LOC101060424 /// LOC653786 /// OTOA	0.295198	1.8192	0.169453
1553433_PM_at	coiled-coil domain containing 171	CCDC171	0.0550855	0	0.313865
1553434_PM_at	cytochrome P450, family 4, subfamily Z, polypeptide 2, pseudogene	CYP4Z2P	1.75418	0.757948	1.53174
1553435_PM_at	chromosome 18 open reading frame 15	C18orf15	1.71838	0.603948	1.38932
1553436_PM_at	mucin 19, oligomeric	MUC19	1.20005	0.387621	0.761525
1553437_PM_at	kelch domain containing 7A	KLHDC7A	1.15296	0.78172	0.831449
1553438_PM_at	chromosome 11 open reading frame 72	C11orf72	0.483202	0	0.661168
1553439_PM_at	---	---	1.11008	0	0.664546
1553440_PM_at	AQP4 antisense RNA 1	AQP4-AS1	0.650762	0.840579	0.658927
1553441_PM_at	contactin associated protein-like 4	CNTNAP4	1.12973	0.422971	1.14618
1553442_PM_a_at	contactin associated protein-like 4	CNTNAP4	1.1329	1.49611	0.561203
1553443_PM_at	FER1L6 antisense RNA 1	FER1L6-AS1	0.752876	0.742138	1.34411
1553444_PM_a_at	chromosome 1 open reading frame 127	C1orf127	1.32322	0.531503	0.477033
1553446_PM_at	transmembrane protein FLJ37396	LOC100996634	1.92089	0	2.02598
1553447_PM_at	ATP/GTP binding protein-like 1	AGBL1	1.05896	1.65962	1.42064
1553448_PM_at	uncharacterized FLJ34503	FLJ34503	1.00196	0	1.23187
1553449_PM_at	long intergenic non-protein coding RNA 304	LINC00304	0.590119	0.631108	0.503344
1553450_PM_s_at	long intergenic non-protein coding RNA 304	LINC00304	0.646054	0.336252	0.754325
1553451_PM_at	coiled-coil domain containing 79	CCDC79	0.820143	0.674564	1.04669
1553452_PM_at	myosin IH	MYO1H	0.949266	0	0.676195
1553453_PM_at	ankyrin repeat and SOCS box containing 14	ASB14	0.652742	2.17504	1.13278
1553454_PM_at	repetin	RPTN	0.686851	0	0.495817
1553456_PM_at	---	---	1.55635	0	1.65021
1553457_PM_at	long intergenic non-protein coding RNA 269	LINC00269	1.34022	0.711663	1.01887
1553458_PM_at	V-set and transmembrane domain containing 4	VSTM4	1.64555	1.19568	1.18898
1553459_PM_at	coiled-coil domain containing 150	CCDC150	0.456671	0	0.796147
1553460_PM_at	chromosome 2 open reading frame 61	C2orf61	1.11949	0.619671	0.0144049
1553461_PM_at	family with sequence similarity 9, member B	FAM9B	1.18728	0	1.08263
1553462_PM_at	---	---	0.767236	1.06911	0.661242
1553464_PM_at	uncharacterized FLJ40288	FLJ40288	0.882195	0.120371	0.211753
1553465_PM_a_at	carboxylesterase 5A	CES5A	1.27402	0	0.454943
1553466_PM_at	calponin homology domain containing 2	CHDC2	0.606927	0.147772	0.17139
1553467_PM_at	DDB1 and CUL4 associated factor 8-like 2 /// uncharacterized locus FLJ32742	DCAF8L2 /// FLJ32742	1.2543	1.16612	1.00187
1553468_PM_at	HYDIN2, axonemal central pair apparatus protein (pseudogene)	HYDIN2	0.656002	0	1.16377
1553470_PM_at	dynein, axonemal, heavy chain 17	DNAH17	0.641309	0.286324	0.777721
1553471_PM_at	solute carrier family 35, member G3	SLC35G3	0.470514	0	0.00560303
1553472_PM_at	uncharacterized protein FLJ32955	FLJ32955	0.577474	0.956347	0.214173
1553474_PM_at	POTE ankyrin domain family member D-like /// POTE ankyrin domain family, member C	LOC100288966 /// POTEC	0.774655	0.58779	0.186256
1553475_PM_at	---	---	1.14849	0.488858	0.826377
1553478_PM_at	KIRREL3 antisense RNA 3	KIRREL3-AS3	1.39835	0.672499	1.49705
1553479_PM_at	transmembrane protein 145	TMEM145	0.340553	0.767205	0.498229
1553482_PM_at	chromosome 15 open reading frame 32	C15orf32	0.917472	0	1.1063
1553483_PM_at	testis specific, 10 interacting protein	TSGA10IP	1.51636	0	1.3844
1553484_PM_at	long intergenic non-protein coding RNA 477	LINC00477	1.43134	0	1.19243
1553485_PM_at	coiled-coil domain containing 140	CCDC140	1.82697	0.306927	1.49415
1553486_PM_a_at	chromosome 17 open reading frame 78	C17orf78	0.186207	0.695216	0.208009
1553488_PM_at	tektin 5	TEKT5	1.52142	0.434069	1.47678
1553489_PM_a_at	tektin 5	TEKT5	1.2405	0	1.7075
1553491_PM_at	kinase suppressor of ras 2	KSR2	0.434249	0	0.649525
1553492_PM_a_at	paired box 1	PAX1	1.47339	0.357695	1.42813
1553493_PM_a_at	L-threonine dehydrogenase	TDH	1.54818	0	1.27468
1553494_PM_at	L-threonine dehydrogenase	TDH	0.195655	0.306639	0.18714
1553497_PM_at	long intergenic non-protein coding RNA 615	LINC00615	1.13683	0.465967	1.31061
1553498_PM_at	---	---	0.883957	0.695985	0.999411
1553499_PM_s_at	serpin peptidase inhibitor, clade A (alpha-1 antiproteinase, antitrypsin), member 9	SERPINA9	0.899329	0.965867	1.14774
1553500_PM_at	F-box and leucine-rich repeat protein 21 (gene/pseudogene)	FBXL21	0.884232	0.99605	1.4024
1553502_PM_a_at	A kinase (PRKA) anchor protein 2 /// paralemmin 2 /// PALM2-AKAP2 readthrough	AKAP2 /// PALM2 /// PALM2-AKAP2	1.27795	0.665847	1.84956
1553504_PM_at	MAS-related GPR, member X4	MRGPRX4	1.33295	0.811189	1.58476
1553505_PM_at	alpha-2-macroglobulin-like 1	A2ML1	0.444238	0.745658	0.923964
1553506_PM_at	carboxypeptidase O	CPO	0.679455	0.671459	0.203367
1553507_PM_a_at	G protein-coupled receptor 6	GPR6	0.344037	0.356742	0.440074
1553508_PM_at	myelodysplastic syndrome 2 translocation associated	MDS2	0.884594	1.64712	0.959315
1553510_PM_s_at	RCD1 required for cell differentiation1 homolog (S. pombe)	RQCD1	0.425678	0.27011	0.251983
1553511_PM_at	gap junction protein, delta 3, 31.9kDa	GJD3	1.02884	0.393578	0.380047
1553512_PM_at	homeobox C12	HOXC12	1.42209	0.674156	1.39983
1553513_PM_at	vanin 3	VNN3	0.346716	0.76757	0.331495
1553514_PM_a_at	vanin 3	VNN3	1.23697	0.53957	1.44577
1553515_PM_at	myeloma overexpressed 2	MYEOV2	0.177334	0.760241	0.0603956
1553517_PM_at	Fer3-like (Drosophila)	FERD3L	0.704074	1.24886	0.846908
1553518_PM_at	defensin, theta 1 pseudogene /// defensin, theta 1 pseudogene 2	DEFT1P /// DEFT1P2	1.90737	0.471468	1.91134
1553519_PM_at	long intergenic non-protein coding RNA 314	LINC00314	0.198422	0.188082	0.27185
1553521_PM_at	defensin, beta 104A /// defensin, beta 104B	DEFB104A /// DEFB104B	1.01892	0.660143	0.766982
1553523_PM_at	NLR family, pyrin domain containing 14	NLRP14	0.599104	0	0.287886
1553524_PM_at	diacylglycerol kinase, beta 90kDa	DGKB	1.02623	0.746734	1.33208
1553525_PM_at	NLR family, pyrin domain containing 13	NLRP13	0.569756	0.708258	0.769498
1553526_PM_at	NLR family, pyrin domain containing 8	NLRP8	0.314758	0.769613	0.787168
1553527_PM_at	NLR family, pyrin domain containing 9	NLRP9	1.37887	1.24713	1.71216
1553528_PM_a_at	TAF5 RNA polymerase II, TATA box binding protein (TBP)-associated factor, 100kDa	TAF5	0.896726	0.781753	1.58657
1553529_PM_at	taste receptor, type 1, member 2	TAS1R2	1.06048	0	0.888872
1553530_PM_a_at	integrin, beta 1 (fibronectin receptor, beta polypeptide, antigen CD29 includes MDF2, MSK12)	ITGB1	1.09598	1.07559	0.861993
1553531_PM_at	proprotein convertase subtilisin/kexin type 6	PCSK6	1.28925	0.721125	1.235
1553532_PM_a_at	zinc finger protein 341	ZNF341	1.12851	0.47987	0.512656
1553533_PM_at	junctophilin 1	JPH1	0.948622	1.30496	0.397023
1553534_PM_at	NLR family, pyrin domain containing 10	NLRP10	0.862263	0	1.00582
1553535_PM_a_at	Ran GTPase activating protein 1	RANGAP1	0.368206	0	0.588727
1553536_PM_at	muscleblind-like splicing regulator 2	MBNL2	0.504011	0	0.377688
1553537_PM_at	keratin 73	KRT73	0.659549	0	0.415694
1553538_PM_s_at	cytochrome c oxidase subunit I	COX1	1.11965	1.39861	1.12641
1553539_PM_at	keratin 74	KRT74	1.02432	0.534184	0.464944
1553540_PM_a_at	solute carrier family 29 (nucleoside transporters), member 2	SLC29A2	0.28031	1.13834	0.503598
1553541_PM_at	LIM homeobox transcription factor 1, alpha	LMX1A	0.220862	0	0.19142
1553542_PM_at	coiled-coil domain containing 125	CCDC125	0.716115	0	0.138814
1553544_PM_at	G protein-coupled receptor 101	GPR101	0.0939473	0	0.0642105
1553545_PM_at	immunoglobulin-like domain containing receptor 1	ILDR1	0.843212	1.9231	0.933318
1553546_PM_at	---	---	1.43852	0.844611	1.46601
1553547_PM_at	---	---	0.246216	1.00718	0.179467
1553549_PM_at	vomeronasal 1 receptor 2	VN1R2	0.618104	0.62449	0.248791
1553550_PM_at	vomeronasal 1 receptor 5 (gene/pseudogene)	VN1R5	0.577741	0	0.659258
1553551_PM_s_at	MTND2	ND2	0.839508	0	0.8166
1553552_PM_at	trace amine associated receptor 8	TAAR8	0.467827	0	0.327939
1553553_PM_at	taste receptor, type 2, member 39	TAS2R39	0.124103	0	0.082554
1553555_PM_at	taste receptor, type 2, member 38	TAS2R38	1.07376	0.291902	0.723491
1553556_PM_at	taste receptor, type 2, member 40	TAS2R40	0.693358	0.867608	0.0807016
1553558_PM_at	taste receptor, type 2, member 41	TAS2R41	0.298273	0.560473	0.616841
1553559_PM_at	transmembrane protein 171	TMEM171	1.62648	1.26951	0.678195
1553560_PM_at	vomeronasal 1 receptor 4	VN1R4	1.07586	0	0.910056
1553561_PM_at	taste receptor, type 2, member 50	TAS2R50	1.04313	0.813318	0.847841
1553562_PM_at	CD8b molecule /// putative T-cell surface glycoprotein CD8 beta-2 chain-like	CD8B /// LOC100996919	0.761328	0	0.263121
1553564_PM_at	MACRO domain containing 2	MACROD2	1.32155	1.37917	1.74321
1553565_PM_s_at	dimethylarginine dimethylaminohydrolase 1	DDAH1	0.877855	0.526993	1.0881
1553566_PM_at	PILR alpha associated neural protein	PIANP	1.10331	0.915628	1.20299
1553567_PM_s_at	ATP synthase F0 subunit 6	ATP6	1.17294	0.743525	1.268
1553568_PM_a_at	histone cluster 1, H1t	HIST1H1T	1.55905	0	1.35463
1553569_PM_at	cytochrome c oxidase subunit II /// OAF homolog (Drosophila) /// transducin-like enhancer of split 1 (E(sp1) homolog, Drosophila)	COX2 /// OAF /// TLE1	0.514864	0.329365	0.505821
1553570_PM_x_at	cytochrome c oxidase subunit II /// OAF homolog (Drosophila) /// transducin-like enhancer of split 1 (E(sp1) homolog, Drosophila)	COX2 /// OAF /// TLE1	0.438134	0.538259	0.457864
1553572_PM_a_at	cytoglobin	CYGB	0.353652	0.854757	0.312608
1553573_PM_s_at	ephrin-A2	EFNA2	0.923859	0.861768	0.981803
1553574_PM_at	interferon, epsilon	IFNE	0.548359	0	0.0996386
1553575_PM_at	NADH dehydrogenase, subunit 6 (complex I)	ND6	0.824254	0	0.62701
1553579_PM_a_at	sperm associated antigen 11A /// sperm associated antigen 11B	SPAG11A /// SPAG11B	0.368213	1.63522	0.304468
1553581_PM_s_at	SREK1-interacting protein 1	SREK1IP1	1.6143	0	1.96716
1553582_PM_a_at	sperm associated antigen 11A /// sperm associated antigen 11B	SPAG11A /// SPAG11B	0.680728	0.297519	0.152939
1553583_PM_a_at	thyroid hormone responsive	THRSP	0.794655	0.739653	0.586287
1553584_PM_at	chromosome X open reading frame 36	CXorf36	0.835618	1.20134	0.985213
1553585_PM_a_at	MAGEA10-MAGEA5 readthrough /// melanoma antigen family A, 5	MAGEA10-MAGEA5 /// MAGEA5	1.08692	0	0.93411
1553586_PM_at	FBXL19 antisense RNA 1 (head to head)	FBXL19-AS1	1.35306	0.352223	1.29207
1553587_PM_a_at	polymerase (DNA-directed), epsilon 4, accessory subunit	POLE4	0.465185	0.797109	0.911874
1553588_PM_at	NADH dehydrogenase, subunit 3 (complex I) /// SH3-domain kinase binding protein 1	ND3 /// SH3KBP1	0.978658	1.3748	0.670979
1553589_PM_a_at	PDZK1 interacting protein 1	PDZK1IP1	0.917367	1.87793	0.921294
1553590_PM_at	family with sequence similarity 27, member E1 /// family with sequence similarity 27, member E2 /// family with sequence similarity 27, member E3 /// family with sequence similarity 27, member E4	FAM27E1 /// FAM27E2 /// FAM27E3 /// FAM27E4	1.35855	0	1.10812
1553591_PM_at	breakpoint cluster region pseudogene 3	BCRP3	1.07857	0	1.12457
1553592_PM_x_at	breakpoint cluster region pseudogene 3	BCRP3	1.18368	0	1.01249
1553593_PM_a_at	T-cell acute lymphocytic leukemia 2	TAL2	1.00456	0	1.14703
1553594_PM_a_at	insulin-like 3 (Leydig cell)	INSL3	0.950483	2.08922	0.467687
1553599_PM_a_at	synaptonemal complex protein 3	SYCP3	1.0365	1.61272	1.64889
1553600_PM_at	transmembrane inner ear	TMIE	0.355044	0	0.327973
1553601_PM_a_at	transmembrane inner ear	TMIE	0.439422	0.494664	0.618772
1553602_PM_at	mucin-like 1	MUCL1	1.1325	0	0.956447
1553603_PM_s_at	atlastin GTPase 2	ATL2	0.682185	1.60903	0.201325
1553604_PM_at	ATP-binding cassette, sub-family A (ABC1), member 13	ABCA13	0.931084	0	0.649601
1553605_PM_a_at	ATP-binding cassette, sub-family A (ABC1), member 13	ABCA13	1.06485	0.640894	0.661917
1553607_PM_at	BTB and CNC homology 1, basic leucine zipper transcription factor 1 /// GRIK1 antisense RNA 2 /// long intergenic non-protein coding RNA 189	BACH1 /// GRIK1-AS2 /// LINC00189	1.46568	0.71221	1.46134
1553608_PM_a_at	long intergenic non-protein coding RNA 189	LINC00189	0.973206	0	1.07733
1553611_PM_s_at	kelch-like family member 35	KLHL35	0.753828	0.472576	1.10373
1553612_PM_at	zinc finger protein 354B	ZNF354B	1.12791	0	0.711095
1553613_PM_s_at	forkhead box C1	FOXC1	0.648784	0.928902	0.131128
1553614_PM_a_at	uncharacterized protein FLJ25694	FLJ25694	1.33267	0	1.34602
1553618_PM_at	tripartite motif containing 43 /// tripartite motif containing 43B	TRIM43 /// TRIM43B	0.793925	0.80784	0.342155
1553619_PM_a_at	tripartite motif containing 43 /// tripartite motif containing 43B	TRIM43 /// TRIM43B	1.07783	1.04056	0.829619
1553620_PM_at	tripartite motif containing 42	TRIM42	0.739057	0	0.348419
1553622_PM_a_at	fibrous sheath interacting protein 1	FSIP1	0.739804	0.547515	0.330176
1553623_PM_at	uncharacterized protein MGC15705	MGC15705	0.252194	0	0.746266
1553625_PM_at	family with sequence similarity 98, member B	FAM98B	0.745921	0.650191	0.337202
1553626_PM_a_at	EF-hand calcium binding domain 13	EFCAB13	0.627546	0	0.117236
1553627_PM_s_at	EF-hand calcium binding domain 13	EFCAB13	0.881752	0	0.071117
1553629_PM_a_at	family with sequence similarity 71, member B	FAM71B	1.20495	0.662996	0.628716
1553630_PM_at	chromosome 10 open reading frame 107	C10orf107	0.726364	0	1.4692
1553633_PM_s_at	solute carrier family 9, subfamily B (NHA1, cation proton antiporter 1), member 1	SLC9B1	0.854644	1.8453	0.299449
1553634_PM_a_at	WEE2 antisense RNA 1	WEE2-AS1	1.1206	0.406854	0.831897
1553635_PM_s_at	Tctex1 domain containing 1	TCTEX1D1	1.44789	0.2543	0.902649
1553636_PM_at	transmembrane and coiled-coil domains 5A	TMCO5A	0.205019	0.279459	0.440775
1553637_PM_s_at	transmembrane and coiled-coil domains 5A	TMCO5A	1.14673	0.432368	0.965835
1553639_PM_a_at	peroxisome proliferator-activated receptor gamma, coactivator 1 beta	PPARGC1B	0.765785	0	0.763119
1553640_PM_at	XK, Kell blood group complex subunit-related family, member 6	XKR6	0.680908	0.519609	0.158336
1553641_PM_a_at	testis specific, 13	TSGA13	1.46143	0.875296	1.54934
1553642_PM_at	chromosome 9 open reading frame 163	C9orf163	1.53876	0.872314	1.53502
1553644_PM_at	spectrin repeat containing, nuclear envelope family member 3	SYNE3	1.26337	0	0.803947
1553645_PM_at	coiled-coil domain containing 141	CCDC141	0.686042	0	0.0481844
1553646_PM_at	highly divergent homeobox	HDX	0.684994	0	0.93664
1553647_PM_at	chromodomain protein, Y-like 2	CDYL2	1.07334	0	1.32132
1553651_PM_at	chromosome 18 open reading frame 54	C18orf54	1.96489	0.905846	1.67445
1553652_PM_a_at	chromosome 18 open reading frame 54	C18orf54	0.472878	1.17858	0.333619
1553654_PM_at	synaptotagmin XIV	SYT14	0.934253	0.477715	1.03556
1553655_PM_at	cell division cycle 20B	CDC20B	1.38127	0.487664	0.890891
1553656_PM_at	tectorin beta	TECTB	0.790341	2.18169	1.59263
1553657_PM_at	von Willebrand factor A domain-containing protein 3A-like /// von Willebrand factor A domain containing 3A	LOC101060557 /// VWA3A	0.642361	0.651371	0.99162
1553658_PM_at	long intergenic non-protein coding RNA 896	LINC00896	1.00738	1.78229	1.16144
1553660_PM_at	HUS1 checkpoint homolog b (S. pombe)	HUS1B	1.10398	0.322065	0.599622
1553661_PM_a_at	HUS1 checkpoint homolog b (S. pombe)	HUS1B	0.652951	0	0.609482
1553663_PM_a_at	neuropeptide B	NPB	0.899688	0.151985	0.918375
1553666_PM_at	coiled-coil domain containing 34	CCDC34	1.55988	0.746011	2.27318
1553668_PM_at	leucine-rich repeats and calponin homology (CH) domain containing 3	LRCH3	0.276303	0.545207	0.84412
1553670_PM_at	integrator complex subunit 4	INTS4	0.510573	0.922007	0.395707
1553672_PM_at	enabled homolog (Drosophila)	ENAH	0.861781	1.10035	0.0579324
1553673_PM_at	serine/threonine kinase 35	STK35	0.830412	0	0.214876
1553674_PM_at	leucine-rich repeats and IQ motif containing 3	LRRIQ3	0.214069	1.04425	0.192996
1553675_PM_at	kinesin light chain 4	KLC4	0.631151	0.662167	0.0126905
1553677_PM_a_at	TIP41, TOR signaling pathway regulator-like (S. cerevisiae)	TIPRL	0.571978	0.477276	0.2544
1553678_PM_a_at	integrin, beta 1 (fibronectin receptor, beta polypeptide, antigen CD29 includes MDF2, MSK12)	ITGB1	1.11696	0	0.79802
1553679_PM_s_at	vitamin K epoxide reductase complex, subunit 1-like 1	VKORC1L1	1.33855	1.3594	0.844864
1553681_PM_a_at	perforin 1 (pore forming protein)	PRF1	1.51613	1.31002	2.2905
1553682_PM_at	F-box and leucine-rich repeat protein 14	FBXL14	1.4979	1.3774	1.12483
1553683_PM_s_at	F-box and leucine-rich repeat protein 14	FBXL14	0.50441	0.633615	0.514205
1553684_PM_at	peptidylprolyl isomerase (cyclophilin)-like 6	PPIL6	0.763407	1.31983	1.36092
1553685_PM_s_at	Sp1 transcription factor	SP1	0.928089	1.56331	1.3939
1553686_PM_at	chromosome 18 open reading frame 25	C18orf25	1.17608	1.22897	1.55549
1553688_PM_at	methyltransferase like 6	METTL6	1.60358	0.879234	0.462991
1553689_PM_s_at	methyltransferase like 6	METTL6	1.03602	0.904611	1.56046
1553690_PM_at	shugoshin-like 1 (S. pombe)	SGOL1	0.754773	1.486	1.4769
1553691_PM_at	beta-1,3-N-acetylgalactosaminyltransferase 2	B3GALNT2	0.649329	0	0.355331
1553693_PM_s_at	carbonyl reductase 4	CBR4	0.621674	1.08702	0.0673462
1553694_PM_a_at	phosphatidylinositol-4-phosphate 3-kinase, catalytic subunit type 2 alpha	PIK3C2A	1.16236	1.53339	0.736923
1553695_PM_a_at	NLR family member X1	NLRX1	0.57615	1.44008	0.36834
1553696_PM_s_at	zinc finger protein 569	ZNF569	0.30331	0	0.157396
1553697_PM_at	centriole, cilia and spindle-associated protein	CCSAP	0.795485	1.3815	1.08322
1553698_PM_a_at	centriole, cilia and spindle-associated protein	CCSAP	1.20278	0.5928	0.044287
1553701_PM_a_at	dual specificity phosphatase 18	DUSP18	1.02363	0	1.0928
1553702_PM_at	zinc finger protein 697	ZNF697	1.02652	0.437704	0.124225
1553703_PM_at	zinc finger protein 791	ZNF791	0.390167	0	0.327165
1553704_PM_x_at	zinc finger protein 791	ZNF791	0.590563	0.679204	0.0761655
1553705_PM_a_at	cholinergic receptor, muscarinic 3	CHRM3	0.842961	0	0.34503
1553706_PM_at	HtrA serine peptidase 4	HTRA4	0.83744	0	1.15522
1553708_PM_at	long intergenic non-protein coding RNA 525	LINC00525	1.1976	0.462565	1.0273
1553709_PM_a_at	PRP38 pre-mRNA processing factor 38 (yeast) domain containing A	PRPF38A	1.77951	1.54295	1.75391
1553710_PM_at	family with sequence similarity 218, member A	FAM218A	1.33258	1.20077	0.959914
1553711_PM_a_at	family with sequence similarity 218, member A	FAM218A	1.01763	0	1.07377
1553713_PM_a_at	Ras homolog enriched in brain like 1	RHEBL1	0.640367	1.20105	0.930128
1553715_PM_s_at	family with sequence similarity 195, member A	FAM195A	0.738382	1.1599	0.586052
1553717_PM_at	potassium channel tetramerisation domain containing 7 /// RAB guanine nucleotide exchange factor (GEF) 1	KCTD7 /// RABGEF1	0.761501	2.15545	0.558836
1553718_PM_at	zinc finger protein 548	ZNF548	0.744509	1.02524	0.0710928
1553719_PM_s_at	zinc finger protein 548	ZNF548	0.507215	0	0.437096
1553720_PM_a_at	APC membrane recruitment protein 2	AMER2	1.65028	0.913341	1.10662
1553721_PM_at	ring finger protein 152	RNF152	0.606412	1.06223	0.57034
1553722_PM_s_at	ring finger protein 152	RNF152	0.584293	0	0.241749
1553723_PM_at	G protein-coupled receptor 97	GPR97	0.911722	0	0.0874802
1553725_PM_s_at	uncharacterized LOC100996620 /// zinc finger protein 644	LOC100996620 /// ZNF644	0.872469	0.974926	0.520799
1553726_PM_s_at	chromosome 6 open reading frame 170	C6orf170	0.696826	0.758878	0.962619
1553727_PM_at	beta-1,4-N-acetyl-galactosaminyl transferase 3	B4GALNT3	0.79705	0.639985	0.108211
1553728_PM_at	leucine rich repeat containing 43	LRRC43	1.77449	0.356503	0.0367923
1553729_PM_s_at	leucine rich repeat containing 43	LRRC43	1.39891	0	1.97203
1553730_PM_x_at	leucine rich repeat containing 43	LRRC43	0.813882	1.66434	0.837965
1553732_PM_s_at	centrosomal protein 89kDa	CEP89	0.0882657	0.475617	0.309026
1553734_PM_at	adenylate kinase 7	AK7	0.224984	0	0.225964
1553736_PM_at	zinc finger, C3H1-type containing	ZFC3H1	0.177201	0.613075	0.483162
1553739_PM_at	interleukin-1 receptor-associated kinase 2	IRAK2	1.40778	0.887967	1.36412
1553740_PM_a_at	interleukin-1 receptor-associated kinase 2	IRAK2	1.29221	1.31999	0.27214
1553741_PM_at	long intergenic non-protein coding RNA 337	LINC00337	0.635188	0.438608	1.06808
1553743_PM_at	methyltransferase like 21A	METTL21A	0.967937	0.215332	0.161401
1553746_PM_a_at	otogelin-like	OTOGL	0.880057	0.0993553	1.0424
1553747_PM_at	uncharacterized LOC85009	MGC16025	1.09743	0.662406	0.893315
1553749_PM_at	family with sequence similarity 76, member B	FAM76B	0.329953	1.15264	0.0992516
1553750_PM_a_at	family with sequence similarity 76, member B	FAM76B	1.3904	1.5137	0.386228
1553752_PM_at	spermatogenesis associated 25	SPATA25	0.609922	0.729735	0.778872
1553755_PM_at	nucleoredoxin-like 1	NXNL1	1.52861	0.664534	1.82525
1553756_PM_at	GLIS3 antisense RNA 1	GLIS3-AS1	1.29902	0.909748	1.32681
1553757_PM_at	IQ motif containing G	IQCG	1.09709	0.587106	0.298861
1553759_PM_at	minichromosome maintenance complex component 9	MCM9	0.830307	0.750087	1.05058
1553761_PM_at	proline rich 14-like	PRR14L	0.496776	1.32914	0.6935
1553764_PM_a_at	ajuba LIM protein	AJUBA	0.436832	0	0.433547
1553765_PM_a_at	kelch-like family member 32	KLHL32	0.379974	0.651062	0.427377
1553768_PM_a_at	discoidin, CUB and LCCL domain containing 1	DCBLD1	1.25308	0.486573	0.772294
1553769_PM_at	SLAM family member 9	SLAMF9	1.16163	0	1.40767
1553770_PM_a_at	SLAM family member 9	SLAMF9	0.976175	0.148132	1.61553
1553772_PM_at	glycerol kinase 5 (putative)	GK5	0.698748	0.231281	1.07414
1553775_PM_at	uncharacterized FLJ31715	FLJ31715	1.0453	1.38184	1.34666
1553776_PM_at	ubiquitin-conjugating enzyme E2U (putative)	UBE2U	1.48576	1.66184	1.6676
1553778_PM_at	Williams Beuren syndrome chromosome region 27	WBSCR27	1.00809	0.457949	0.419991
1553780_PM_at	long intergenic non-protein coding RNA 638	LINC00638	0.562381	0.634925	0.119432
1553781_PM_at	zinc finger CCCH-type, antiviral 1-like	ZC3HAV1L	0.775058	1.05807	0.366848
1553785_PM_at	RasGEF domain family, member 1B	RASGEF1B	1.75229	1.62379	2.38433
1553787_PM_at	chromosome 11 open reading frame 45	C11orf45	0.251592	0.700328	0.437411
1553789_PM_a_at	chromosome 21 open reading frame 58	C21orf58	0.328161	0.46307	0.234645
1553792_PM_at	KIAA1109	KIAA1109	0.811016	0.441561	1.18283
1553793_PM_a_at	KIAA1109	KIAA1109	1.1188	1.49842	1.21031
1553794_PM_at	stomatin (EPB72)-like 3	STOML3	1.10276	1.04529	0.948443
1553796_PM_at	uncharacterized LOC150622 /// uncharacterized LOC400940	LOC150622 /// LOC400940	0.708653	0.750732	0.295776
1553797_PM_a_at	uncharacterized LOC150622 /// uncharacterized LOC400940	LOC150622 /// LOC400940	0.966899	1.24447	0.528282
1553798_PM_a_at	F-box and leucine-rich repeat protein 13	FBXL13	1.32598	0.310301	0.999658
1553799_PM_at	family with sequence similarity 227, member B	FAM227B	0.573949	0.40656	0.572477
1553801_PM_a_at	D-tyrosyl-tRNA deacylase 2 (putative)	DTD2	0.57498	1.54597	0.464657
1553802_PM_a_at	SRY (sex determining region Y)-box 3	SOX3	1.10632	0.535154	0.992585
1553803_PM_at	spermatogenesis associated 32	SPATA32	1.47713	0.354355	1.50408
1553804_PM_a_at	spermatogenesis associated 32	SPATA32	0.867606	0	1.10221
1553805_PM_at	chromosome 3 open reading frame 49	C3orf49	1.28076	0.180031	1.22125
1553808_PM_a_at	NK2 homeobox 3	NKX2-3	0.738183	1.08892	0.773731
1553809_PM_a_at	transmembrane protein 252	TMEM252	0.52565	0.682567	0.619554
1553810_PM_a_at	KIAA1524	KIAA1524	0.447357	0	0.178047
1553811_PM_at	FAM222A antisense RNA 1	FAM222A-AS1	0.839357	1.60139	1.34734
1553812_PM_at	transducin-like enhancer of split 6 (E(sp1) homolog, Drosophila)	TLE6	0.253975	1.49505	0.153461
1553813_PM_s_at	transducin-like enhancer of split 6 (E(sp1) homolog, Drosophila)	TLE6	0.750745	0.545282	1.05417
1553815_PM_a_at	transcription elongation factor A (SII) N-terminal and central domain containing	TCEANC	0.601963	0.656792	1.06982
1553817_PM_at	putative POM121-like protein 1-like /// putative POM121-like protein 1-like /// putative POM121-like protein 1-like /// POM121 transmembrane nucleoporin-like 10, pseudogene /// POM121 transmembrane nucleoporin-like 1, pseudogene /// POM121 transmembrane nucleoporin-like 4 pseudogene /// POM121 transmembrane nucleoporin-like 8 pseudogene /// POM121 transmembrane nucleoporin-like 9, pseudogene	LOC100996817 /// LOC101060466 /// LOC727983 /// POM121L10P /// POM121L1P /// POM121L4P /// POM121L8P /// POM121L9P	1.9115	0	1.75918
1553818_PM_x_at	putative POM121-like protein 1-like /// putative POM121-like protein 1-like /// putative POM121-like protein 1-like /// POM121 transmembrane nucleoporin-like 10, pseudogene /// POM121 transmembrane nucleoporin-like 1, pseudogene /// POM121 transmembrane nucleoporin-like 4 pseudogene /// POM121 transmembrane nucleoporin-like 8 pseudogene /// POM121 transmembrane nucleoporin-like 9, pseudogene	LOC100996817 /// LOC101060466 /// LOC727983 /// POM121L10P /// POM121L1P /// POM121L4P /// POM121L8P /// POM121L9P	1.19014	0	0.888184
1553821_PM_at	HECT domain containing E3 ubiquitin protein ligase 4	HECTD4	0.622611	1.9716	0.503615
1553822_PM_at	receptor (chemosensory) transporter protein 1	RTP1	0.397961	0.649792	0.742134
1553823_PM_a_at	receptor (chemosensory) transporter protein 1	RTP1	0.883622	0.988422	1.30142
1553826_PM_a_at	chromosome 16 open reading frame 11	C16orf11	1.19068	0.378717	1.40298
1553828_PM_at	neurexophilin and PC-esterase domain family, member 1	NXPE1	1.09064	1.39728	1.71814
1553829_PM_at	CYP1B1 antisense RNA 1	CYP1B1-AS1	1.51969	0.667014	0.542706
1553830_PM_s_at	melanoma antigen family A, 2 /// melanoma antigen family A, 2B	MAGEA2 /// MAGEA2B	1.38	0.43076	1.49814
1553831_PM_at	apolipoprotein B mRNA editing enzyme, catalytic polypeptide-like 3D	APOBEC3D	0.457941	0.971635	0.729762
1553832_PM_at	long intergenic non-protein coding RNA 315	LINC00315	1.04914	1.79661	0.241303
1553834_PM_at	collagen, type VI, alpha 5	COL6A5	0.123943	0.604807	0.300167
1553835_PM_a_at	collagen, type VI, alpha 5	COL6A5	1.52361	0	0.93125
1553837_PM_at	phosphoglycerate mutase family member 5	PGAM5	0.355755	0	0.48057
1553838_PM_at	chromosome 4 open reading frame 45	C4orf45	1.86177	0.444528	1.87114
1553839_PM_at	coiled-coil domain containing 149	CCDC149	0.961648	1.22815	0.12107
1553840_PM_a_at	coiled-coil domain containing 149	CCDC149	0.919815	0.583059	0.558774
1553842_PM_at	BEN domain containing 2	BEND2	1.1017	1.26273	0.021965
1553843_PM_at	chromosome 10 open reading frame 67	C10orf67	0.771803	1.87289	0.446115
1553844_PM_a_at	chromosome 10 open reading frame 67	C10orf67	0.880061	0	1.04383
1553845_PM_x_at	chromosome 10 open reading frame 67	C10orf67	1.22981	1.00627	0.602712
1553846_PM_at	spermatid associated	SPERT	0.743941	0.786203	1.15258
1553847_PM_a_at	spermatid associated	SPERT	0.594986	0.80871	0.342304
1553849_PM_at	coiled-coil domain containing 26	CCDC26	0.467435	0.947418	0.0507836
1553850_PM_at	chromosome 21 open reading frame 88	C21orf88	0.665677	0.872688	0.813539
1553851_PM_at	Spi-C transcription factor (Spi-1/PU.1 related)	SPIC	0.911955	0.637892	0.518584
1553852_PM_at	vacuolar protein sorting 13 homolog B (yeast)	VPS13B	0.654532	0.938289	0.0501425
1553856_PM_s_at	purinergic receptor P2Y, G-protein coupled, 10	P2RY10	0.722039	1.03873	0.533613
1553857_PM_at	immunoglobulin superfamily, member 22	IGSF22	0.591495	0.95327	0.70221
1553858_PM_at	zinc finger and BTB domain containing 3	ZBTB3	1.04668	0.562362	1.07401
1553859_PM_at	tryptophan hydroxylase 1	TPH1	0.204484	1.05917	0.458472
1553860_PM_at	DC-STAMP domain containing 1	DCST1	0.836016	0	0.257174
1553861_PM_at	t-complex 11, testis-specific-like 2	TCP11L2	0.711861	0	0.0694343
1553863_PM_at	WDFY family member 4	WDFY4	0.413813	0.495479	0.174287
1553864_PM_at	G protein-coupled receptor 26	GPR26	1.4309	0	0.96344
1553865_PM_a_at	G protein-coupled receptor 26	GPR26	1.18112	0	1.17586
1553868_PM_a_at	KIAA0825	KIAA0825	0.56792	0	0.0497936
1553869_PM_at	sestrin 3	SESN3	0.292597	0.350341	0.369992
1553871_PM_at	CSNK1G2 antisense RNA 1	CSNK1G2-AS1	1.79227	0	1.02369
1553872_PM_at	chromosome 17 open reading frame 103	C17orf103	0.528447	0	0.130694
1553873_PM_at	kelch-like family member 34	KLHL34	0.880857	0.66474	1.12498
1553874_PM_a_at	zinc finger and SCAN domain containing 10	ZSCAN10	0.571847	0	0.967817
1553875_PM_s_at	zinc finger and SCAN domain containing 10	ZSCAN10	0.696469	1.21263	1.17541
1553876_PM_at	sterile alpha motif domain containing 3	SAMD3	1.41904	0.936582	2.32227
1553878_PM_at	glutamic-oxaloacetic transaminase 1-like 1	GOT1L1	0.545262	0.669439	0.0681428
1553879_PM_a_at	glutamic-oxaloacetic transaminase 1-like 1	GOT1L1	0.441703	0.788644	0.740633
1553880_PM_at	chromosome 10 open reading frame 91	C10orf91	0.615742	0	0.846044
1553881_PM_at	uncharacterized protein MGC16142	MGC16142	0.24747	0.887502	0.401019
1553882_PM_at	long intergenic non-protein coding RNA 504 /// NULL	LINC00504 /// LINC00504	1.18001	0.49314	0.323506
1553883_PM_at	zinc finger protein 99	ZNF99	1.2088	0.943636	0.729759
1553885_PM_x_at	zinc finger protein 99	ZNF99	1.29185	0	1.1596
1553886_PM_at	coiled-coil domain containing 108	CCDC108	1.59284	0	0.0573055
1553887_PM_at	SIGLEC family like 1	SIGLECL1	1.17592	1.25311	0.966785
1553888_PM_at	lactate dehydrogenase A-like 6A	LDHAL6A	0.803576	0	1.21897
1553889_PM_at	MAS-related GPR, member X2	MRGPRX2	0.812165	0.617039	1.39622
1553890_PM_s_at	netrin 5	NTN5	0.894251	0.362885	0.127155
1553891_PM_at	Kruppel-like factor 17	KLF17	1.41084	0	0.786073
1553893_PM_at	coiled-coil domain containing 105	CCDC105	1.42645	0	1.18133
1553894_PM_at	coiled-coil domain containing 122	CCDC122	0.212914	0	0.103328
1553895_PM_at	chromosome 11 open reading frame 42	C11orf42	1.50221	0.911534	1.63834
1553898_PM_a_at	uncharacterized protein DKFZp434L192	DKFZp434L192	1.22268	0.983083	0.899319
1553900_PM_s_at	putative POM121-like protein 1-like /// POM121 transmembrane nucleoporin-like 1, pseudogene /// POM121 transmembrane nucleoporin-like 8 pseudogene /// POM121 transmembrane nucleoporin-like 9, pseudogene	LOC727983 /// POM121L1P /// POM121L8P /// POM121L9P	0.616967	0	0.974303
1553901_PM_x_at	zinc finger protein 486	ZNF486	0.803479	2.45111	0.449893
1553905_PM_at	chromosome X open reading frame 22	CXorf22	1.55313	0.0663001	1.77795
1553906_PM_s_at	FYVE, RhoGEF and PH domain containing 2	FGD2	0.191769	0	0.00669411
1553907_PM_a_at	exonuclease 3'-5' domain containing 1	EXD1	0.431975	0	0.259138
1553909_PM_x_at	family with sequence similarity 178, member A	FAM178A	0.902592	0.642982	0.357122
1553910_PM_at	neuroblastoma breakpoint family, member 22, pseudogene /// neuroblastoma breakpoint family, member 4 /// neuroblastoma breakpoint family, member 6	NBPF22P /// NBPF4 /// NBPF6	1.18947	1.18948	1.92013
1553911_PM_at	zinc finger protein 663	ZNF663	0.364054	0.878214	0.533597
1553912_PM_at	long intergenic non-protein coding RNA 955	LINC00955	1.22382	0	1.96563
1553914_PM_at	NULL /// NULL	CTD-2144E22.5 /// OTTHUMG00000176223	1.16974	0.784581	0.585742
1553915_PM_at	chromosome 10 open reading frame 126	C10orf126	0.497868	0.955018	0.224523
1553917_PM_at	phosphoinositide kinase, FYVE finger containing	PIKFYVE	0.766205	1.56012	0.888872
1553918_PM_at	long intergenic non-protein coding RNA 479	LINC00479	1.05253	0.828302	0.960341
1553919_PM_at	chromosome 9 open reading frame 62	C9orf62	1.33643	0	0.910574
1553920_PM_at	chromosome 9 open reading frame 84	C9orf84	0.201261	0.28794	0.194905
1553923_PM_at	solute carrier family 22, member 24	SLC22A24	0.41555	0.460386	0.859521
1553924_PM_at	flavin containing monooxygenase 9 pseudogene	FMO9P	0.946916	0.716829	1.59993
1553927_PM_at	chromosome 7 open reading frame 33	C7orf33	1.15716	0.968372	1.59979
1553928_PM_at	ELMO/CED-12 domain containing 2	ELMOD2	1.10022	0.255477	0.105062
1553929_PM_at	alkaline ceramidase 1	ACER1	0.941692	1.66407	0.760494
1553930_PM_at	trace amine associated receptor 1	TAAR1	1.28124	0.478794	1.38054
1553931_PM_at	oligosaccharyltransferase complex subunit pseudogene 1	OSTCP1	0.598223	2.27089	0.758566
1553934_PM_at	long intergenic non-protein coding RNA 305	LINC00305	1.09528	0.640775	0.131467
1553935_PM_at	uncharacterized protein MGC2848	MGC2848	1.60781	1.12399	1.3394
1553936_PM_a_at	uncharacterized protein MGC2848	MGC2848	1.51889	0.341353	1.65741
1553938_PM_a_at	serine/threonine kinase 32A	STK32A	1.20541	0.219362	0.702569
1553940_PM_a_at	leucine rich repeat containing 28	LRRC28	0.212541	1.67766	0.782754
1553943_PM_at	NS3BP	NS3BP	1.45367	1.44678	0.679445
1553944_PM_at	CTAGE family, member 5 /// melanoma inhibitory activity 2	CTAGE5 /// MIA2	1.28312	1.64373	1.42951
1553945_PM_at	glycoprotein hormone beta 5	GPHB5	0.7743	0	0.857789
1553946_PM_at	dermcidin	DCD	0.478723	1.12669	0.352884
1553947_PM_at	exosome component 6	EXOSC6	1.8993	0.925728	0.293863
1553949_PM_at	IQ motif and Sec7 domain 3	IQSEC3	0.644787	0.144693	0.557472
1553952_PM_at	zinc finger, DHHC-type containing 19	ZDHHC19	1.08772	1.59896	1.2377
1553954_PM_at	ALG14, UDP-N-acetylglucosaminyltransferase subunit	ALG14	0.488214	0	0.49054
1553955_PM_at	protein phosphatase 1, regulatory subunit 21	PPP1R21	1.57714	0.500564	1.98463
1553956_PM_at	transmembrane protein 237	TMEM237	0.738002	1.15095	0.654432
1553957_PM_at	zinc finger protein 564	ZNF564	1.36861	0.791795	0.72711
1553959_PM_a_at	UDP-Gal:betaGal beta 1,3-galactosyltransferase polypeptide 6	B3GALT6	0.475268	0.0993542	0.0435961
1553960_PM_at	sorting nexin family member 21	SNX21	0.797382	0.313102	0.753107
1553961_PM_s_at	sorting nexin family member 21	SNX21	0.821436	0.464923	0.541992
1553962_PM_s_at	ras homolog family member B	RHOB	0.526577	0.365485	0.339207
1553963_PM_at	ras homolog family member B	RHOB	0.898495	1.21556	1.58753
1553965_PM_x_at	ras homolog family member B	RHOB	0.789921	0.643592	0.632463
1553967_PM_at	adenosine deaminase, tRNA-specific 3	ADAT3	1.28919	0.419767	0.693145
1553968_PM_a_at	adenosine deaminase, tRNA-specific 3	ADAT3	0.734571	0.904141	0.902631
1553970_PM_s_at	carboxyl ester lipase	CEL	0.24867	0	0.573587
1553971_PM_a_at	GATS, stromal antigen 3 opposite strand	GATS	0.801511	0	0.90203
1553972_PM_a_at	cystathionine-beta-synthase	CBS	0.660022	1.29569	0.671073
1553973_PM_a_at	serine peptidase inhibitor, Kazal type 6	SPINK6	1.19216	1.38188	0.962483
1553974_PM_at	chromosome 22 open reading frame 39	C22orf39	1.34541	0	2.00371
1553976_PM_a_at	deleted in primary ciliary dyskinesia homolog (mouse)	DPCD	0.337315	0.401931	0.500655
1553977_PM_a_at	cytochrome P450, family 39, subfamily A, polypeptide 1	CYP39A1	1.29576	0	0.73893
1553978_PM_at	myocyte enhancer factor 2B /// MEF2B neighbor /// MEF2BNB-MEF2B readthrough	MEF2B /// MEF2BNB /// MEF2BNB-MEF2B	1.14637	1.15774	1.62414
1553979_PM_at	zinc finger protein 121	ZNF121	1.25832	0.250687	1.24479
1553982_PM_a_at	RAB7B, member RAS oncogene family	RAB7B	1.42089	0.89222	1.59679
1553983_PM_at	deoxythymidylate kinase (thymidylate kinase)	DTYMK	1.49961	0.390095	1.75339
1553984_PM_s_at	deoxythymidylate kinase (thymidylate kinase)	DTYMK	1.23991	0.674908	1.56576
1553986_PM_at	RAS and EF-hand domain containing	RASEF	1.33815	1.02667	1.38086
1553987_PM_at	MAPKAPK5 antisense RNA 1	MAPKAPK5-AS1	1.19525	0.609008	1.21532
1553989_PM_a_at	ATPase, H+ transporting, lysosomal 42kDa, V1 subunit C2	ATP6V1C2	1.53591	0	0.889523
1553990_PM_at	BRICHOS domain containing 5	BRICD5	0.93006	0	0.00877125
1553991_PM_s_at	V-set and immunoglobulin domain containing 10	VSIG10	0.505608	0	0.592713
1553992_PM_s_at	neighbor of BRCA1 gene 2 (non-protein coding)	NBR2	0.76282	0.993821	0.640641
1553993_PM_s_at	mediator complex subunit 25	MED25	1.03819	1.15982	0.585973
1553994_PM_at	5'-nucleotidase, ecto (CD73)	NT5E	1.22849	0.325881	0.926195
1553995_PM_a_at	5'-nucleotidase, ecto (CD73)	NT5E	1.21662	0	1.66041
1553997_PM_a_at	aspartate beta-hydroxylase domain containing 1	ASPHD1	0.531392	0.834125	1.06119
1553998_PM_at	DMRT-like family C1 /// DMRT-like family C1B	DMRTC1 /// DMRTC1B	1.15149	0	0.590583
1554001_PM_at	tripartite motif containing 37	TRIM37	1.40004	0	1.15659
1554003_PM_at	Rho guanine nucleotide exchange factor (GEF) 28	ARHGEF28	0.57502	0	1.42716
1554004_PM_a_at	Rho guanine nucleotide exchange factor (GEF) 28	ARHGEF28	0.399705	0	0.134833
1554006_PM_a_at	lethal giant larvae homolog 2 (Drosophila)	LLGL2	0.969106	0.640128	0.586261
1554007_PM_at	---	---	0.152371	0.179588	0.112206
1554008_PM_at	oncostatin M receptor	OSMR	0.548546	0.60581	0.0912251
1554010_PM_at	N-deacetylase/N-sulfotransferase (heparan glucosaminyl) 1	NDST1	0.798595	1.41013	0.619191
1554012_PM_at	R-spondin 2	RSPO2	0.966851	0.648097	1.13112
1554014_PM_at	chromodomain helicase DNA binding protein 2 /// uncharacterized LOC100507217	CHD2 /// LOC100507217	0.567765	0.967859	0.292269
1554015_PM_a_at	chromodomain helicase DNA binding protein 2 /// uncharacterized LOC100507217	CHD2 /// LOC100507217	0.477973	0.743661	0.721067
1554016_PM_a_at	U6 snRNA biogenesis 1	USB1	1.1104	0.625628	1.19325
1554017_PM_at	Rab interacting lysosomal protein-like 1 /// small nuclear ribonucleoprotein 35kDa (U11/U12)	RILPL1 /// SNRNP35	0.875869	1.94696	0.495869
1554018_PM_at	glycoprotein (transmembrane) nmb	GPNMB	0.655047	1.54913	0.301934
1554019_PM_s_at	centrosomal protein 57kDa-like 1	CEP57L1	0.457973	0.489242	0.3817
1554020_PM_at	bicaudal D homolog 1 (Drosophila)	BICD1	1.256	1.97489	1.11144
1554021_PM_a_at	zinc finger protein 12	ZNF12	1.02239	0	0.936027
1554022_PM_at	coiled-coil domain containing 13	CCDC13	1.06608	0	1.08014
1554023_PM_s_at	coiled-coil domain containing 13	CCDC13	0.612138	0.395318	0.303094
1554026_PM_a_at	myosin X	MYO10	1.90512	0.523123	1.77384
1554027_PM_a_at	solute carrier family 4, sodium bicarbonate cotransporter, member 4	SLC4A4	0.978131	1.05448	0.868376
1554029_PM_a_at	tetratricopeptide repeat domain 37	TTC37	1.0978	0	1.10513
1554030_PM_at	arylsulfatase B	ARSB	0.90592	1.8053	1.55467
1554032_PM_at	arylsulfatase B	ARSB	1.1252	0	0.299968
1554033_PM_at	FERM domain containing 4A	FRMD4A	0.723325	1.51634	0.71351
1554034_PM_a_at	FERM domain containing 4A	FRMD4A	0.842377	1.3455	0.0939661
1554036_PM_at	zinc finger and BTB domain containing 24	ZBTB24	0.7209	0	0.278162
1554037_PM_a_at	zinc finger and BTB domain containing 24	ZBTB24	0.848314	0.463192	0.732888
1554038_PM_at	La ribonucleoprotein domain family, member 1B	LARP1B	0.676506	1.05926	0.768463
1554039_PM_at	chromosome 14 open reading frame 159	C14orf159	0.279163	0.44123	0.40581
1554041_PM_at	transmembrane protein 239	TMEM239	1.94489	0	0.990819
1554042_PM_s_at	transmembrane protein 239	TMEM239	1.18226	0.991565	1.0511
1554043_PM_a_at	---	---	0.531336	0.625914	0.493561
1554044_PM_a_at	melanocortin 2 receptor accessory protein	MRAP	0.52327	1.51285	0.335905
1554045_PM_at	zinc finger protein 24	ZNF24	0.703787	0.572167	0.712021
1554047_PM_at	thioredoxin domain containing 9	TXNDC9	1.05267	0	0.991381
1554049_PM_s_at	DDB1 and CUL4 associated factor 8	DCAF8	1.20037	0.879995	1.24069
1554050_PM_at	sphingomyelin phosphodiesterase, acid-like 3B	SMPDL3B	1.84137	0.705831	1.60603
1554052_PM_at	CCR4-NOT transcription complex, subunit 1	CNOT1	0.677013	1.7809	1.02423
1554053_PM_at	serine palmitoyltransferase, long chain base subunit 1	SPTLC1	0.424536	0.968759	1.15012
1554057_PM_at	ASH1L antisense RNA 1	ASH1L-AS1	1.00654	0.377173	0.801757
1554059_PM_at	SET domain and mariner transposase fusion gene	SETMAR	0.765259	0	0.880299
1554060_PM_s_at	SET domain and mariner transposase fusion gene	SETMAR	0.880529	0.955868	0.451129
1554062_PM_at	Xg blood group	XG	0.245997	0.145205	0.23376
1554063_PM_at	ZHX1-C8ORF76 readthrough	ZHX1-C8ORF76	0.235251	1.21259	0.356167
1554065_PM_at	multivesicular body subunit 12B	MVB12B	0.407346	1.63921	0.241897
1554067_PM_at	chromosome 12 open reading frame 66	C12orf66	0.272672	0	0.384004
1554068_PM_s_at	chromosome 12 open reading frame 66	C12orf66	0.4734	0.96939	0.41522
1554069_PM_at	EPH receptor A8	EPHA8	1.57504	0	0.378313
1554071_PM_at	coiled-coil domain containing 67	CCDC67	0.561031	0	0.417839
1554072_PM_s_at	coiled-coil domain containing 67	CCDC67	0.807468	0	0.487832
1554074_PM_s_at	schlafen-like 1	SLFNL1	0.872088	0.920866	0.197886
1554076_PM_s_at	transmembrane protein 136	TMEM136	0.857927	0.310785	0.503762
1554077_PM_a_at	transmembrane protein 53	TMEM53	0.261775	0.339807	0.0198997
1554078_PM_s_at	DnaJ (Hsp40) homolog, subfamily A, member 3	DNAJA3	0.418153	0	0.510777
1554079_PM_at	UDP-N-acetyl-alpha-D-galactosamine:polypeptide N-acetylgalactosaminyltransferase 18	GALNT18	1.43556	0.563632	1.40406
1554080_PM_at	RCD1 required for cell differentiation1 homolog (S. pombe)	RQCD1	0.762702	0.58403	0.509241
1554082_PM_a_at	nucleolar protein 9	NOL9	0.802171	0.88891	1.08657
1554084_PM_a_at	nucleolar protein 9	NOL9	0.879678	0.62939	0.92252
1554085_PM_at	DEAD (Asp-Glu-Ala-Asp) box polypeptide 51	DDX51	0.632949	1.31189	0.164415
1554086_PM_at	tubulin, gamma complex associated protein 3	TUBGCP3	0.698499	0	0.116768
1554089_PM_s_at	Shwachman-Bodian-Diamond syndrome /// Shwachman-Bodian-Diamond syndrome pseudogene 1	SBDS /// SBDSP1	0.161461	0	0.673746
1554091_PM_a_at	toll-interleukin 1 receptor (TIR) domain containing adaptor protein	TIRAP	0.537622	1.08463	0.472064
1554093_PM_a_at	small nuclear RNA activating complex, polypeptide 5, 19kDa	SNAPC5	0.773178	0	1.31841
1554094_PM_at	ectonucleoside triphosphate diphosphohydrolase 5	ENTPD5	0.0837518	0	0.279237
1554095_PM_at	RNA binding motif protein 33	RBM33	0.188113	0.773508	0.339645
1554096_PM_a_at	RNA binding motif protein 33	RBM33	0.716756	0.363707	0.00791609
1554097_PM_a_at	MIR31 host gene (non-protein coding)	MIR31HG	0.433331	0	0.817672
1554098_PM_at	spindlin family, member 3	SPIN3	1.04801	0	0.531419
1554099_PM_a_at	spindlin family, member 3	SPIN3	1.67157	0.958853	1.78318
1554101_PM_a_at	transmembrane and tetratricopeptide repeat containing 4	TMTC4	0.57474	0	0.658515
1554102_PM_a_at	transmembrane and tetratricopeptide repeat containing 4	TMTC4	0.161912	1.30869	0.221684
1554103_PM_at	---	---	1.00751	0.526872	1.25007
1554105_PM_at	transmembrane protein 185A	TMEM185A	0.789029	0	0.748409
1554106_PM_at	neurobeachin-like 1	NBEAL1	0.644561	0	0.431878
1554108_PM_at	neurobeachin-like 1	NBEAL1	0.0710734	0.684054	0.188309
1554110_PM_at	CUB domain containing protein 1	CDCP1	1.71849	1.05708	1.7721
1554112_PM_a_at	unc-51-like kinase 2 (C. elegans)	ULK2	0.348956	1.38961	0.44486
1554113_PM_a_at	solute carrier family 4, sodium bicarbonate cotransporter, member 8	SLC4A8	1.00041	1.17863	0.596119
1554114_PM_s_at	slingshot protein phosphatase 2	SSH2	0.0934341	1.31265	0.18107
1554115_PM_at	chromosome 5 open reading frame 58	C5orf58	1.36698	0.542152	0.200777
1554116_PM_s_at	poly (ADP-ribose) polymerase family, member 11	PARP11	0.352219	2.06065	0.565137
1554117_PM_at	coiled-coil domain containing 60	CCDC60	0.332886	0.759513	0.579795
1554119_PM_at	U6 snRNA biogenesis 1	USB1	1.17297	0	1.26859
1554121_PM_at	hydroxysteroid (17-beta) dehydrogenase 12	HSD17B12	1.01684	0	0.335773
1554122_PM_a_at	hydroxysteroid (17-beta) dehydrogenase 12	HSD17B12	1.03413	0.997164	1.04819
1554125_PM_a_at	neuroligin 4, Y-linked	NLGN4Y	1.02035	0	0.870124
1554126_PM_at	methionine sulfoxide reductase B3	MSRB3	0.960214	1.6968	0.137186
1554127_PM_s_at	methionine sulfoxide reductase B3	MSRB3	0.955599	0.605903	1.47018
1554128_PM_at	adipogenin	ADIG	0.961664	0	0.570132
1554129_PM_a_at	adipogenin	ADIG	1.20402	0	1.01134
1554131_PM_at	coiled-coil serine-rich protein 2	CCSER2	1.27509	0	0.320924
1554132_PM_a_at	coiled-coil serine-rich protein 2	CCSER2	1.46932	0.656387	1.81797
1554133_PM_at	RUN and FYVE domain containing 2	RUFY2	0.806442	0.365905	0.240707
1554140_PM_at	WD repeat domain 78	WDR78	0.757032	0.274327	1.15307
1554141_PM_s_at	WD repeat domain 78	WDR78	0.823185	1.14527	0.424059
1554142_PM_at	suppressor of G2 allele of SKP1 (S. cerevisiae) pseudogene 3	SUGT1P3	0.867886	1.69419	0.119122
1554143_PM_a_at	suppressor of G2 allele of SKP1 (S. cerevisiae) pseudogene 3	SUGT1P3	0.369522	0.275675	0.354082
1554145_PM_a_at	protein phosphatase 1, regulatory subunit 21	PPP1R21	0.865708	0.69998	0.165431
1554147_PM_s_at	MYCBP-associated, testis expressed 1	MAATS1	0.127072	0.696447	0.564172
1554148_PM_a_at	solute carrier family 33 (acetyl-CoA transporter), member 1	SLC33A1	0.183599	1.99674	0.0323122
1554149_PM_at	claudin domain containing 1	CLDND1	1.31414	1.60526	1.39174
1554151_PM_at	oxoglutarate (alpha-ketoglutarate) dehydrogenase (lipoamide)	OGDH	0.667211	0.24818	0.218025
1554152_PM_a_at	oxoglutarate (alpha-ketoglutarate) dehydrogenase (lipoamide)	OGDH	1.43579	0	1.21959
1554153_PM_a_at	PHD finger protein 21A	PHF21A	1.64961	0.713665	1.40795
1554154_PM_at	ganglioside induced differentiation associated protein 2	GDAP2	1.27659	0.177468	1.07179
1554155_PM_at	microcephalin 1	MCPH1	1.04082	0.664062	1.46842
1554156_PM_a_at	WAP four-disulfide core domain 8	WFDC8	0.984206	2.05718	0.750184
1554157_PM_a_at	WAP four-disulfide core domain 8	WFDC8	1.74565	0	1.69664
1554158_PM_at	zinc finger, MYND-type containing 11	ZMYND11	1.09213	0.679053	1.47657
1554159_PM_a_at	zinc finger, MYND-type containing 11	ZMYND11	0.575652	2.2993	0.35824
1554160_PM_a_at	zinc finger protein 446	ZNF446	0.831251	0.403662	0.504749
1554161_PM_at	solute carrier family 25, member 27	SLC25A27	1.5065	0.398874	2.22056
1554163_PM_at	twist basic helix-loop-helix transcription factor 2	TWIST2	1.63518	0	1.74534
1554165_PM_at	family with sequence similarity 53, member B	FAM53B	0.52822	0.615565	0.321208
1554167_PM_a_at	golgin A7	GOLGA7	1.65595	0	1.89325
1554168_PM_a_at	SH3-domain kinase binding protein 1	SH3KBP1	1.43211	0.400242	1.70877
1554170_PM_a_at	metallo-beta-lactamase domain containing 1	MBLAC1	0.664005	0	0.414256
1554171_PM_at	zinc finger, MYM-type 3	ZMYM3	1.62503	0.194018	1.99178
1554172_PM_a_at	zinc finger, MYM-type 3	ZMYM3	0.489539	1.38342	0.341456
1554173_PM_at	CD300 molecule-like family member b	CD300LB	1.55783	1.60364	1.63403
1554175_PM_at	CD300 molecule-like family member b	CD300LB	1.42996	0.675937	0.851591
1554176_PM_a_at	chromosome 3 open reading frame 33	C3orf33	0.343661	0.795815	0.716989
1554177_PM_a_at	ATP synthase, H+ transporting, mitochondrial Fo complex, subunit s (factor B)	ATP5S	0.927132	0.426443	1.0692
1554178_PM_a_at	family with sequence similarity 126, member B	FAM126B	0.4371	2.0043	0.68301
1554179_PM_s_at	Ly6/neurotoxin 1	LYNX1	0.809457	0.514836	0.647482
1554181_PM_at	sorting nexin 32	SNX32	1.52773	0	1.40562
1554182_PM_at	tripartite motif containing 73 /// tripartite motif containing 74	TRIM73 /// TRIM74	0.784626	0.394408	0.345863
1554183_PM_s_at	tripartite motif containing 73 /// tripartite motif containing 74	TRIM73 /// TRIM74	0.334105	0.657135	0.424885
1554185_PM_at	leucine carboxyl methyltransferase 1 pseudogene	LOC554206	0.864388	1.2187	0.618859
1554187_PM_at	leucine carboxyl methyltransferase 1 pseudogene	LOC554206	0.111591	0.585158	0.39658
1554188_PM_at	chromosome 11 open reading frame 53	C11orf53	1.05133	0.94698	0.347697
1554190_PM_s_at	pleckstrin homology domain containing, family S member 1	PLEKHS1	0.826258	1.93745	0.449691
1554192_PM_s_at	tRNA methyltransferase 44 homolog (S. cerevisiae)	TRMT44	0.413544	0	0.768947
1554193_PM_s_at	mannosidase, endo-alpha	MANEA	0.85701	0.443218	0.417496
1554194_PM_at	---	---	0.598765	0.583733	0.319211
1554195_PM_a_at	chromosome 5 open reading frame 46	C5orf46	0.857452	0.358486	1.05287
1554196_PM_at	izumo sperm-egg fusion 1	IZUMO1	0.583575	0	0.423491
1554198_PM_at	SH3 domain containing, Ysc84-like 1 (S. cerevisiae)	SH3YL1	0.488083	1.44253	0.456476
1554199_PM_at	protein tyrosine phosphatase, receptor type, O	PTPRO	0.352864	2.0235	0.274731
1554201_PM_at	calcium binding protein 4	CABP4	1.05476	0.771697	1.6286
1554202_PM_x_at	calcium binding protein 4	CABP4	1.39789	2.11091	1.21083
1554203_PM_at	GRIK1 antisense RNA 1	GRIK1-AS1	0.549556	0.523207	0.332911
1554205_PM_s_at	islet cell autoantigen 1,69kDa-like	ICA1L	0.979047	0	1.59186
1554206_PM_at	trimethyllysine hydroxylase, epsilon	TMLHE	0.884482	0.559929	0.363515
1554208_PM_at	meiosis inhibitor 1	MEI1	0.957617	1.12791	1.16569
1554210_PM_at	zinc finger, CCHC domain containing 13	ZCCHC13	1.31474	0.398241	1.07386
1554212_PM_s_at	potassium voltage-gated channel, delayed-rectifier, subfamily S, member 2	KCNS2	1.36824	0.889971	1.76361
1554213_PM_at	Rho guanine nucleotide exchange factor (GEF) 10	ARHGEF10	0.70506	0	0.929289
1554214_PM_at	---	---	1.46646	0.68254	1.16363
1554216_PM_at	coiled-coil domain containing 132	CCDC132	0.769671	0.970513	0.589784
1554217_PM_a_at	coiled-coil domain containing 132	CCDC132	0.116713	0.754276	0.383653
1554219_PM_at	---	---	0.927843	0.622602	0.272585
1554220_PM_a_at	---	---	0.535099	0.429116	0.275233
1554222_PM_at	uncharacterized LOC284365	MGC45922	1.50884	0.675198	1.32477
1554224_PM_at	---	---	0.45088	0.832701	0.202424
1554225_PM_a_at	---	---	1.14086	0.719441	0.813486
1554228_PM_a_at	chromosome 8 open reading frame 56	C8orf56	1.15071	1.20495	1.62929
1554229_PM_at	CREB3 regulatory factor	CREBRF	1.58145	0.927766	1.76893
1554231_PM_a_at	zinc finger protein 396	ZNF396	0.608239	0.358115	0.43962
1554232_PM_a_at	---	---	1.36906	0	1.24604
1554233_PM_at	C1q and tumor necrosis factor related protein 9	C1QTNF9	1.69329	0.226784	1.04863
1554234_PM_at	katanin p60 subunit A-like 2	KATNAL2	0.670557	0	0.244295
1554235_PM_at	catenin (cadherin-associated protein), alpha 3	CTNNA3	1.24222	0.348137	1.33424
1554237_PM_at	serologically defined colon cancer antigen 8	SDCCAG8	0.904016	1.46148	0.937612
1554239_PM_s_at	zinc binding alcohol dehydrogenase domain containing 2	ZADH2	1.40071	1.16827	0.55586
1554240_PM_a_at	integrin, alpha L (antigen CD11A (p180), lymphocyte function-associated antigen 1; alpha polypeptide)	ITGAL	1.17914	0	1.30451
1554241_PM_at	cochlin	COCH	1.42614	2.02589	1.46432
1554242_PM_a_at	cochlin	COCH	0.35919	0.626413	0.479654
1554245_PM_x_at	ADP-ribosylation factor-like 17A /// ADP-ribosylation factor-like 17B /// ADP-ribosylation factor-like protein 17-like /// ADP-ribosylation factor-like protein 17-like	ARL17A /// ARL17B /// LOC100294341 /// LOC100996709	0.999665	1.21636	0.731004
1554246_PM_at	chromosome 1 open reading frame 210	C1orf210	1.27426	0	1.48936
1554248_PM_at	zinc finger protein 638	ZNF638	0.543827	0.561786	0.189082
1554249_PM_a_at	zinc finger protein 638 /// ZNF638 intronic transcript 1 (non-protein coding)	ZNF638 /// ZNF638-IT1	0.965137	0.854843	0.811346
1554250_PM_s_at	tripartite motif containing 73	TRIM73	0.530838	0	1.15066
1554251_PM_at	heterochromatin protein 1, binding protein 3	HP1BP3	0.616488	0.467008	0.00175208
1554252_PM_a_at	ceramide synthase 3	CERS3	0.848002	1.51199	0.159037
1554253_PM_a_at	ceramide synthase 3	CERS3	0.628537	0.808051	0.905305
1554256_PM_a_at	pecanex-like 2 (Drosophila)	PCNXL2	0.816927	0	0.856421
1554258_PM_a_at	DnaJ (Hsp40) homolog, subfamily C, member 5 beta	DNAJC5B	0.721967	0.528184	0.989077
1554259_PM_at	G-protein signaling modulator 1	GPSM1	0.638261	0.35281	0.93576
1554260_PM_a_at	FRY-like	FRYL	1.06216	1.09828	1.53073
1554261_PM_at	kelch-like family member 29	KLHL29	1.359	0.826155	0.536883
1554262_PM_s_at	kelch-like family member 29	KLHL29	1.12396	0	0.820767
1554264_PM_at	cytoskeleton associated protein 2	CKAP2	1.01891	1.19904	0.544385
1554266_PM_at	---	---	1.41472	0.819792	1.98188
1554268_PM_at	MORN repeat containing 1	MORN1	1.13501	1.49668	0.914531
1554271_PM_a_at	centromere protein L	CENPL	0.651066	0.882388	0.631
1554272_PM_at	endoplasmic reticulum aminopeptidase 2	ERAP2	0.707575	1.26136	1.05299
1554273_PM_a_at	endoplasmic reticulum aminopeptidase 2	ERAP2	0.762989	0	0.246668
1554274_PM_a_at	slingshot protein phosphatase 1	SSH1	0.463388	1.04994	0.397711
1554276_PM_at	squamous cell carcinoma antigen recognized by T cells 3	SART3	0.362915	0.531661	0.243399
1554277_PM_s_at	Fanconi anemia, complementation group M	FANCM	0.251663	0.56653	0.493822
1554279_PM_a_at	tRNA methyltransferase 2 homolog B (S. cerevisiae)	TRMT2B	0.663608	1.53321	0.3518
1554280_PM_a_at	chromosome 9 open reading frame 43	C9orf43	1.28795	0	1.14395
1554281_PM_at	---	---	1.37642	1.58063	0.991501
1554283_PM_at	CCR4 carbon catabolite repression 4-like (S. cerevisiae)	CCRN4L	0.834904	0	0.433327
1554285_PM_at	hepatitis A virus cellular receptor 2	HAVCR2	0.25562	0	0.673741
1554286_PM_at	MAP/microtubule affinity-regulating kinase 1 pseudogene	FLJ25758	1.0409	1.46663	1.5884
1554287_PM_at	tripartite motif containing 4	TRIM4	0.561882	0.285856	0.372623
1554288_PM_at	family with sequence similarity 160, member B1	FAM160B1	1.18588	0	0.432628
1554290_PM_at	HECT and RLD domain containing E3 ubiquitin protein ligase 3	HERC3	1.45596	0.395025	0.472097
1554291_PM_at	UHRF1 binding protein 1-like	UHRF1BP1L	0.808979	0.993259	0.671461
1554292_PM_a_at	UHRF1 binding protein 1-like	UHRF1BP1L	1.90363	0.883901	2.35824
1554293_PM_at	tau tubulin kinase 2	TTBK2	0.282041	1.23105	0.232479
1554294_PM_s_at	tau tubulin kinase 2	TTBK2	0.603915	1.88409	0.287875
1554295_PM_x_at	tau tubulin kinase 2	TTBK2	0.888573	0	0.0768805
1554296_PM_at	cytochrome P450, family 19, subfamily A, polypeptide 1	CYP19A1	0.948428	0.461173	0.853736
1554298_PM_a_at	WD repeat domain 49	WDR49	0.38144	0.450413	0.474489
1554299_PM_at	neuronal PAS domain protein 4	NPAS4	1.55989	0	1.80375
1554300_PM_a_at	SVOP-like	SVOPL	0.400727	0.715671	0.525333
1554301_PM_at	LHFPL3 antisense RNA 1	LHFPL3-AS1	1.18864	1.84422	1.23975
1554302_PM_s_at	LHFPL3 antisense RNA 1	LHFPL3-AS1	1.69937	0.242303	1.67548
1554303_PM_at	histamine N-methyltransferase	HNMT	0.854728	1.80005	0.349352
1554305_PM_at	uncharacterized protein MGC20647	MGC20647	1.3329	0.414829	1.38978
1554306_PM_at	inositol-trisphosphate 3-kinase B	ITPKB	0.299832	1.28124	0.412612
1554307_PM_at	uncharacterized LOC644852	LOC644852	0.743846	0.361236	0.431011
1554308_PM_s_at	gamma-aminobutyric acid (GABA) A receptor, alpha 2	GABRA2	0.37941	0	0.00697528
1554309_PM_at	eukaryotic translation initiation factor 4 gamma, 3	EIF4G3	0.589349	0.679133	0.670258
1554310_PM_a_at	eukaryotic translation initiation factor 4 gamma, 3	EIF4G3	1.79741	0.98099	2.24687
1554311_PM_a_at	suppressor of Ty 6 homolog (S. cerevisiae)	SUPT6H	0.916052	2.36649	0.691173
1554312_PM_at	ring finger protein 170	RNF170	0.751249	0.355705	0.411967
1554314_PM_at	chromosome 6 open reading frame 141	C6orf141	1.27755	0	0.726388
1554316_PM_at	6-phosphogluconolactonase	PGLS	1.27353	0.608645	1.22687
1554317_PM_s_at	tRNA methyltransferase 61 homolog A (S. cerevisiae)	TRMT61A	0.918725	0.656974	0.593844
1554318_PM_at	FK506 binding protein 6, 36kDa pseudogene	LOC541473	0.76333	0	0.282949
1554319_PM_at	ribosomal protein S6 kinase, 90kDa, polypeptide 5	RPS6KA5	0.849409	0.378877	0.532624
1554321_PM_a_at	NFS1 nitrogen fixation 1 homolog (S. cerevisiae)	NFS1	0.862987	0.615759	1.08385
1554322_PM_a_at	histone deacetylase 4	HDAC4	1.21474	0	1.31081
1554324_PM_s_at	dynein, cytoplasmic 2, light intermediate chain 1	DYNC2LI1	1.53538	0	0.749472
1554325_PM_at	dedicator of cytokinesis 2	DOCK2	0.652905	0	0.874176
1554327_PM_a_at	calcium activated nucleotidase 1	CANT1	0.879447	0.256519	1.08477
1554328_PM_at	syntaxin binding protein 4	STXBP4	0.740389	1.72448	0.358166
1554329_PM_x_at	syntaxin binding protein 4	STXBP4	0.514011	0.902522	0.141397
1554331_PM_a_at	leucine rich repeat containing 18	LRRC18	1.62003	0.684853	1.84394
1554332_PM_a_at	uncharacterized LOC100127888	LOC100127888	1.44067	0	1.37072
1554333_PM_at	DnaJ (Hsp40) homolog, subfamily A, member 4	DNAJA4	1.68704	1.24377	2.17245
1554334_PM_a_at	DnaJ (Hsp40) homolog, subfamily A, member 4	DNAJA4	1.1394	0	1.02845
1554335_PM_at	cytohesin 4	CYTH4	1.33849	0.609919	1.72529
1554337_PM_at	FERM, RhoGEF and pleckstrin domain protein 2	FARP2	0.967997	0.811142	0.902336
1554339_PM_a_at	component of oligomeric golgi complex 3	COG3	0.77507	0	0.747651
1554340_PM_a_at	dorsal inhibitory axon guidance protein /// putative uncharacterized protein encoded by LINC00596-like	DRAXIN /// LOC100996614	1.22843	0	0.0833835
1554341_PM_a_at	helicase, POLQ-like	HELQ	0.578298	0.611188	0.044371
1554342_PM_s_at	helicase, POLQ-like	HELQ	0.0393481	0	0.293266
1554343_PM_a_at	signal transducing adaptor family member 1	STAP1	0.493982	0	0.739537
1554344_PM_s_at	aquaporin 12A /// aquaporin 12B	AQP12A /// AQP12B	1.28731	0.981978	1.62389
1554345_PM_a_at	gypsy retrotransposon integrase 1	GIN1	0.836034	0.836469	0.454909
1554346_PM_at	guanine nucleotide binding protein (G protein), beta 5	GNB5	0.554462	0	0.680011
1554348_PM_s_at	CDKN2A interacting protein N-terminal like	CDKN2AIPNL	0.669653	0	0.762725
1554349_PM_at	XRCC6 binding protein 1	XRCC6BP1	0.227296	1.01634	1.02772
1554351_PM_a_at	TIP41, TOR signaling pathway regulator-like (S. cerevisiae)	TIPRL	0.159718	1.27084	0.500917
1554352_PM_s_at	DENN/MADD domain containing 4A	DENND4A	1.33487	0	0.893295
1554354_PM_at	sialic acid acetylesterase	SIAE	1.11806	0	0.486977
1554355_PM_a_at	sialic acid acetylesterase	SIAE	0.162261	1.12381	0.308917
1554356_PM_at	GINS complex subunit 4 (Sld5 homolog)	GINS4	0.852329	0	0.632614
1554360_PM_at	FCH and double SH3 domains 2	FCHSD2	1.01338	0.720504	0.990556
1554362_PM_at	B-cell translocation gene 4	BTG4	0.798958	0.252891	0.701334
1554364_PM_at	protein phosphatase 2, regulatory subunit B', gamma	PPP2R5C	0.371071	0.718702	0.821496
1554365_PM_a_at	protein phosphatase 2, regulatory subunit B', gamma	PPP2R5C	0.858273	0.909043	0.798851
1554367_PM_at	calcium homeostasis modulator 1	CALHM1	0.825574	1.12473	0.951707
1554368_PM_at	5'-nucleotidase, cytosolic IB /// NT5C1B-RDH14 readthrough	NT5C1B /// NT5C1B-RDH14	0.33455	0.725306	0.173102
1554371_PM_at	polycystic kidney disease 1-like 2	PKD1L2	0.990111	0.685844	0.808199
1554372_PM_at	---	---	1.09748	1.09978	0.70598
1554374_PM_at	---	---	1.19248	1.39201	0.487758
1554375_PM_a_at	nuclear receptor subfamily 1, group H, member 4	NR1H4	1.15675	0.740413	1.67595
1554376_PM_s_at	protein tyrosine phosphatase-like (proline instead of catalytic arginine), member A	PTPLA	1.40873	1.24973	1.68686
1554377_PM_a_at	contactin associated protein-like 4	CNTNAP4	1.2095	0	0.951697
1554378_PM_a_at	phosphodiesterase 1C, calmodulin-dependent 70kDa	PDE1C	0.368218	0.484639	0.196409
1554379_PM_a_at	tumor protein p73	TP73	0.612425	1.5976	0.408943
1554380_PM_at	NIMA-related kinase 11	NEK11	1.3869	0.364803	1.07115
1554382_PM_at	long intergenic non-protein coding RNA 656	LINC00656	0.454442	0.720208	0.674345
1554383_PM_a_at	translocation associated membrane protein 2	TRAM2	0.212738	0.813455	0.565003
1554384_PM_at	peptidyl arginine deiminase, type II	PADI2	0.513341	1.00004	0.371812
1554385_PM_a_at	peptidyl arginine deiminase, type II	PADI2	0.747812	0.843078	1.21429
1554386_PM_at	cystatin 9 (testatin)	CST9	0.856307	0	1.17606
1554388_PM_at	vacuolar protein sorting 29 homolog (S. cerevisiae)	VPS29	0.922951	0	0.458547
1554390_PM_s_at	ARP2 actin-related protein 2 homolog (yeast)	ACTR2	1.78195	0	1.98066
1554391_PM_at	uncharacterized LOC653581	LOC653581	0.645889	0.905281	0.743616
1554393_PM_a_at	arginine decarboxylase	ADC	0.77526	0	0.299827
1554394_PM_at	NEL-like 1 (chicken)	NELL1	1.02039	0	0.154233
1554396_PM_at	UEV and lactate/malate dehyrogenase domains	UEVLD	0.4993	0	0.211858
1554397_PM_s_at	UEV and lactate/malate dehyrogenase domains	UEVLD	0.322308	1.37736	0.157064
1554398_PM_at	lysozyme G-like 2	LYG2	0.669709	0.975064	1.09726
1554400_PM_at	t-complex-associated-testis-expressed 3	TCTE3	0.360412	0	0.510884
1554401_PM_a_at	t-complex-associated-testis-expressed 3	TCTE3	0.781503	0	0.116799
1554403_PM_a_at	NULL /// NULL	OTTHUMG00000173468 /// RP11-574H6.1	0.435102	1.28471	1.04978
1554404_PM_a_at	---	---	0.685764	1.11619	0.821853
1554405_PM_a_at	long intergenic non-protein coding RNA 161	LINC00161	1.25313	1.03552	2.12321
1554406_PM_a_at	C-type lectin domain family 7, member A	CLEC7A	1.48374	0.791491	0.892212
1554408_PM_a_at	thymidine kinase 1, soluble	TK1	1.07288	0	1.30705
1554409_PM_at	RCC1-like G exchanging factor-like /// Williams-Beuren syndrome chromosome region 16	LOC653375 /// WBSCR16	0.179102	0	0.260264
1554410_PM_a_at	RCC1-like G exchanging factor-like /// Williams-Beuren syndrome chromosome region 16	LOC653375 /// WBSCR16	1.16711	0.250292	0.396007
1554411_PM_at	catenin (cadherin-associated protein), beta 1, 88kDa	CTNNB1	0.119292	0.741886	0.308714
1554413_PM_s_at	sorting nexin 29 pseudogene 1 /// sorting nexin 29 pseudogene 2	SNX29P1 /// SNX29P2	0.82223	0.958682	1.11377
1554414_PM_a_at	oxidative stress induced growth inhibitor family member 2	OSGIN2	0.450955	0.7123	0.147027
1554415_PM_at	TAF5-like RNA polymerase II, p300/CBP-associated factor (PCAF)-associated factor, 65kDa	TAF5L	0.575588	0	0.453503
1554417_PM_s_at	APH1A gamma secretase subunit	APH1A	1.32866	1.06359	0.144249
1554418_PM_s_at	sparc/osteonectin, cwcv and kazal-like domains proteoglycan (testican) 3	SPOCK3	0.202434	0.829039	0.182354
1554419_PM_x_at	gametogenetin binding protein 2	GGNBP2	1.24335	0	1.4994
1554420_PM_at	activating transcription factor 3	ATF3	0.443337	1.31687	0.593457
1554423_PM_a_at	F-box protein 7	FBXO7	0.793897	0	1.1463
1554424_PM_at	FIP1 like 1 (S. cerevisiae)	FIP1L1	1.3435	0	1.40093
1554428_PM_s_at	neuroligin 2	NLGN2	0.347631	1.5439	0.315487
1554429_PM_a_at	dystrophia myotonica, WD repeat containing	DMWD	0.647479	1.69123	0.786518
1554430_PM_at	small integral membrane protein 11	SMIM11	0.550422	0	0.178215
1554432_PM_x_at	small integral membrane protein 11	SMIM11	0.666986	0	0.478476
1554433_PM_a_at	zinc finger protein 146	ZNF146	1.152	1.48871	0.92535
1554436_PM_a_at	regenerating islet-derived family, member 4	REG4	1.30108	0	1.06614
1554438_PM_at	KIAA1217	KIAA1217	1.55931	0	1.63539
1554440_PM_at	KIAA0513	KIAA0513	0.73765	2.02357	1.26964
1554441_PM_a_at	wings apart-like homolog (Drosophila)	WAPAL	1.23353	1.38247	0.983045
1554442_PM_at	bestrophin 1	BEST1	0.61527	1.79754	1.37134
1554443_PM_s_at	bestrophin 1	BEST1	0.406068	0.971887	0.854385
1554444_PM_s_at	solute carrier family 35, member F6	SLC35F6	0.15515	0	0.0977274
1554445_PM_at	zinc finger protein 85	ZNF85	1.22248	0.639927	0.782561
1554447_PM_at	JPX transcript, XIST activator (non-protein coding)	JPX	0.783456	0.980683	1.06703
1554448_PM_at	JPX transcript, XIST activator (non-protein coding)	JPX	0.561858	1.1028	0.463882
1554449_PM_at	mesoderm induction early response 1, family member 3	MIER3	0.547648	0	0.137477
1554450_PM_s_at	mesoderm induction early response 1, family member 3	MIER3	0.821262	0.353429	0.327196
1554451_PM_s_at	DnaJ (Hsp40) homolog, subfamily C, member 14	DNAJC14	1.12111	0	0.68073
1554452_PM_a_at	hypoxia inducible lipid droplet-associated	HILPDA	0.801196	0.652848	1.02672
1554453_PM_at	heterogeneous nuclear ribonucleoprotein L-like	HNRNPLL	0.880347	0	0.398576
1554455_PM_at	lines homolog (Drosophila)	LINS	1.32952	0.534432	0.332637
1554456_PM_a_at	lines homolog (Drosophila)	LINS	0.307903	0	0.0740074
1554459_PM_s_at	complement factor H-related 3	CFHR3	0.623842	1.97738	0.80008
1554460_PM_at	ST8 alpha-N-acetyl-neuraminide alpha-2,8-sialyltransferase 4	ST8SIA4	1.39358	0.820301	0.834602
1554462_PM_a_at	DnaJ (Hsp40) homolog, subfamily B, member 9	DNAJB9	0.612381	0	1.13882
1554464_PM_a_at	cartilage associated protein /// cartilage-associated protein-like	CRTAP /// LOC100653071	0.860361	0.917571	1.06232
1554465_PM_s_at	KRAB box domain containing 4 /// zinc finger protein 674	KRBOX4 /// ZNF674	1.73957	0	1.70708
1554466_PM_a_at	chromosome 16 open reading frame 13	C16orf13	0.887774	0	0.680872
1554468_PM_s_at	mitochondrial ribosomal protein L38	MRPL38	0.877236	0	0.741822
1554469_PM_at	zinc finger and BTB domain containing 44	ZBTB44	1.01248	0.250877	0.253161
1554470_PM_s_at	zinc finger and BTB domain containing 44	ZBTB44	1.6183	0	2.1042
1554471_PM_a_at	ankyrin repeat domain 13C	ANKRD13C	0.589632	0.757308	0.0922091
1554472_PM_a_at	PHD finger protein 20-like 1	PHF20L1	0.991577	0.581988	1.22981
1554473_PM_at	SLIT-ROBO Rho GTPase activating protein 1	SRGAP1	0.579583	0	0.300159
1554474_PM_a_at	monooxygenase, DBH-like 1	MOXD1	1.74563	0	1.72443
1554475_PM_a_at	chromosome 19 open reading frame 47	C19orf47	0.613151	0.353016	0.0311122
1554476_PM_x_at	zinc finger protein 808	ZNF808	0.787471	0	0.423812
1554478_PM_a_at	HEAT repeat containing 3	HEATR3	0.339087	1.94966	0.0664502
1554479_PM_a_at	caspase recruitment domain family, member 8	CARD8	1.69175	1.59324	2.55972
1554480_PM_a_at	armadillo repeat containing 10	ARMC10	0.567917	0.888202	0.188647
1554481_PM_a_at	erythrocyte membrane protein band 4.1 (elliptocytosis 1, RH-linked)	EPB41	1.04185	0	1.15753
1554482_PM_a_at	SAR1 homolog B (S. cerevisiae)	SAR1B	1.35226	1.24653	0.22038
1554483_PM_at	transmembrane protein 37	TMEM37	1.75107	1.2591	1.75414
1554485_PM_s_at	transmembrane protein 37	TMEM37	0.976913	1.05684	1.72659
1554486_PM_a_at	glucose-fructose oxidoreductase domain containing 1	GFOD1	0.182909	0	0.0637175
1554487_PM_a_at	activating transcription factor 6 beta	ATF6B	1.40302	0.988629	2.19922
1554488_PM_at	centrosomal protein 70kDa	CEP70	0.862746	0.0401153	1.32787
1554489_PM_a_at	centrosomal protein 70kDa	CEP70	0.76921	0	0.622366
1554491_PM_a_at	serpin peptidase inhibitor, clade C (antithrombin), member 1	SERPINC1	0.289601	0.61801	0.227889
1554492_PM_at	thyroid adenoma associated	THADA	0.594958	0.820261	0.46607
1554493_PM_s_at	thyroid adenoma associated	THADA	0.132768	0	0.126789
1554494_PM_at	methenyltetrahydrofolate synthetase domain containing	MTHFSD	0.409281	0	0.0348891
1554495_PM_s_at	methenyltetrahydrofolate synthetase domain containing	MTHFSD	1.2079	0.465406	0.713346
1554496_PM_at	RAD51 homolog B (S. cerevisiae)	RAD51B	0.969603	1.44835	0.638175
1554499_PM_s_at	pyrophosphatase (inorganic) 2	PPA2	1.06214	1.38049	1.3658
1554500_PM_a_at	regulator of G-protein signaling 7	RGS7	0.335959	0.94358	0.668309
1554501_PM_at	TSC22 domain family, member 4	TSC22D4	0.287839	0.771528	0.247399
1554503_PM_a_at	osteoclast associated, immunoglobulin-like receptor	OSCAR	0.972329	0	0.95579
1554504_PM_at	N-acetylated alpha-linked acidic dipeptidase 2	NAALAD2	1.59091	0.905436	2.19796
1554506_PM_x_at	N-acetylated alpha-linked acidic dipeptidase 2	NAALAD2	1.3097	1.1791	1.0553
1554507_PM_at	N-acetylated alpha-linked acidic dipeptidase 2	NAALAD2	1.11228	1.10203	1.02683
1554508_PM_at	phosphoinositide-3-kinase adaptor protein 1	PIK3AP1	1.5319	0	2.00016
1554509_PM_a_at	family with sequence similarity 188, member A	FAM188A	1.58726	0.813111	1.12434
1554510_PM_s_at	growth hormone inducible transmembrane protein	GHITM	1.83334	0	1.93834
1554511_PM_at	WW and C2 domain containing 1	WWC1	0.983979	0.445123	0.0647278
1554512_PM_a_at	centrosomal protein 89kDa	CEP89	0.637781	0.78257	0.665855
1554513_PM_s_at	centrosomal protein 89kDa	CEP89	0.817432	0.35895	0.0810119
1554514_PM_at	acyl-CoA synthetase medium-chain family member 5	ACSM5	0.697577	1.54706	0.819172
1554516_PM_at	long intergenic non-protein coding RNA 537	LINC00537	0.565278	1.16623	0.673262
1554517_PM_x_at	long intergenic non-protein coding RNA 537	LINC00537	0.599354	1.38401	0.494788
1554518_PM_at	glutathione S-transferase, C-terminal domain containing	GSTCD	0.538298	1.26131	0.219693
1554519_PM_at	CD80 molecule	CD80	0.251043	1.42652	0.210481
1554520_PM_at	uncharacterized LOC100996810 /// uncharacterized LOC283861	LOC100996810 /// LOC283861	1.13506	0	1.08955
1554522_PM_at	cyclin M2	CNNM2	1.47134	0	1.85328
1554523_PM_a_at	cyclin M2	CNNM2	1.17374	2.50187	0.259798
1554524_PM_a_at	olfactomedin 3	OLFM3	0.683906	0	0.720247
1554526_PM_at	olfactomedin 3	OLFM3	1.62316	0.448979	1.09079
1554528_PM_at	MYCBP-associated, testis expressed 1	MAATS1	1.40553	0.60127	1.75354
1554530_PM_at	V-set and transmembrane domain containing 2A	VSTM2A	0.634685	1.06954	0.200585
1554531_PM_at	tetratricopeptide repeat domain 12	TTC12	0.15627	0.88552	0.203533
1554533_PM_at	complement component 2	C2	0.432894	0	0.106314
1554534_PM_at	dihydropyrimidine dehydrogenase	DPYD	0.465526	0.669286	1.25057
1554536_PM_at	dihydropyrimidine dehydrogenase	DPYD	1.07073	0	0.770946
1554537_PM_at	transmembrane protein 126B	TMEM126B	0.794276	0	0.639407
1554538_PM_at	ras homolog family member F (in filopodia)	RHOF	0.63024	0	0.24514
1554539_PM_a_at	ras homolog family member F (in filopodia)	RHOF	1.21274	0	1.25832
1554540_PM_at	dynein, axonemal, heavy chain 14	DNAH14	0.525083	0	0.0774285
1554541_PM_a_at	G protein regulated inducer of neurite outgrowth 2	GPRIN2	1.29372	0	1.39547
1554542_PM_at	solute carrier family 25, member 48	SLC25A48	1.02534	1.37733	1.53476
1554543_PM_at	sperm associated antigen 9	SPAG9	1.05121	0.99558	0.149082
1554544_PM_a_at	myelin basic protein	MBP	1.0247	0.480105	0.995001
1554545_PM_at	apolipoprotein B mRNA editing enzyme, catalytic polypeptide-like 4 (putative)	APOBEC4	1.0266	1.46501	1.59547
1554547_PM_at	family with sequence similarity 13, member C	FAM13C	0.654662	0.981123	1.08244
1554549_PM_a_at	WD repeat domain 20	WDR20	1.10417	0.297182	0.977114
1554550_PM_at	KIAA1430	KIAA1430	0.19232	0.748247	0.642513
1554553_PM_s_at	Yip1 interacting factor homolog B (S. cerevisiae)	YIF1B	1.09392	0	1.65147
1554554_PM_at	coiled-coil domain containing 57	CCDC57	1.08385	0	1.07236
1554555_PM_a_at	SET domain containing 6	SETD6	0.843961	0	1.0973
1554556_PM_a_at	ATPase, class VI, type 11B	ATP11B	0.770794	0.948996	1.197
1554557_PM_at	ATPase, class VI, type 11B	ATP11B	0.744406	0	0.772981
1554558_PM_at	DDB1 and CUL4 associated factor 5	DCAF5	1.10186	0.730517	0.524848
1554559_PM_at	G protein-coupled receptor 62	GPR62	0.611815	0.515481	0.0623843
1554560_PM_at	phosphoglucomutase 5	PGM5	1.22668	0.826507	1.2528
1554564_PM_a_at	signal peptide peptidase like 3	SPPL3	1.04304	0	1.15853
1554565_PM_x_at	signal peptide peptidase like 3	SPPL3	1.16523	0.836802	1.16255
1554566_PM_at	potassium channel tetramerisation domain containing 17	KCTD17	0.40418	0.372588	0.735477
1554568_PM_at	dynein, light chain, roadblock-type 1	DYNLRB1	0.216293	0	0.164105
1554569_PM_a_at	CUGBP, Elav-like family member 2	CELF2	0.22537	1.12792	0.180312
1554571_PM_at	amyloid beta (A4) precursor protein-binding, family B, member 1 interacting protein	APBB1IP	1.6802	1.36767	1.97552
1554572_PM_a_at	suppressor of variegation 3-9 homolog 2 (Drosophila)	SUV39H2	0.869794	0.992564	0.539685
1554574_PM_a_at	cytochrome b5 reductase 3	CYB5R3	0.677421	0.690393	0.428608
1554575_PM_a_at	3'(2'), 5'-bisphosphate nucleotidase 1	BPNT1	1.13402	0	1.26244
1554576_PM_a_at	ets variant 4	ETV4	1.88985	0	1.95237
1554577_PM_a_at	proteasome (prosome, macropain) 26S subunit, non-ATPase, 10	PSMD10	0.591052	0.87678	0.960346
1554578_PM_at	zinc finger protein 70	ZNF70	0.17008	1.00798	0.338674
1554579_PM_a_at	myosin XVIIIB	MYO18B	0.991011	0	1.01045
1554580_PM_a_at	WW domain containing E3 ubiquitin protein ligase 2	WWP2	0.498804	0.313238	0.918533
1554582_PM_a_at	methyltransferase like 20	METTL20	0.406797	0	0.570525
1554583_PM_a_at	methyltransferase like 20	METTL20	0.705269	0.513855	0.67345
1554584_PM_at	leucine rich repeat containing 48	LRRC48	0.862532	0.61079	0.667375
1554586_PM_a_at	Rho-related BTB domain containing 2	RHOBTB2	1.47414	0	0.940466
1554588_PM_a_at	tetratricopeptide repeat domain 30B	TTC30B	0.904536	1.43843	1.15086
1554589_PM_at	leukocyte receptor cluster (LRC) member 9	LENG9	0.432612	0.641641	0.296798
1554591_PM_at	prostate cancer associated transcript 4 (non-protein coding)	PCAT4	1.08459	0.059359	1.07804
1554592_PM_a_at	solute carrier family 1 (high affinity aspartate/glutamate transporter), member 6	SLC1A6	0.796625	1.26563	1.1859
1554593_PM_s_at	solute carrier family 1 (high affinity aspartate/glutamate transporter), member 6	SLC1A6	0.638736	0.169282	0.311392
1554594_PM_at	Rho GTPase activating protein 27	ARHGAP27	1.24798	1.86788	0.16616
1554595_PM_at	symplekin	SYMPK	0.763444	1.02829	0.346521
1554597_PM_at	NULL /// NULL	OTTHUMG00000179815 /// RP5-837J1.2	0.325662	1.45505	0.582634
1554599_PM_x_at	general transcription factor IIH, polypeptide 3, 34kDa	GTF2H3	0.702565	0.760531	0.111632
1554600_PM_s_at	lamin A/C	LMNA	1.09072	0.516414	1.14214
1554601_PM_at	Na+/K+ transporting ATPase interacting 2	NKAIN2	0.433365	0.90839	0.631288
1554602_PM_at	RNA-binding protein 8A-like /// RNA binding motif protein 8A	LOC101060541 /// RBM8A	0.425572	0.912842	0.985778
1554604_PM_at	membrane-bound transcription factor peptidase, site 2	MBTPS2	0.596686	0	0.36316
1554606_PM_at	centrosomal protein 120kDa	CEP120	1.38565	0	0.898598
1554607_PM_at	connector enhancer of kinase suppressor of Ras 2	CNKSR2	1.33099	0.981014	0.982681
1554608_PM_at	trans-golgi network protein 2	TGOLN2	0.499326	1.4193	0.74338
1554609_PM_at	uncharacterized LOC100287896	LOC100287896	0.590575	0.224043	0.52812
1554610_PM_at	ankyrin repeat and MYND domain containing 1	ANKMY1	0.763904	0.528484	0.923328
1554612_PM_at	KIAA0226	KIAA0226	1.0486	0	1.49218
1554613_PM_a_at	KIAA0226	KIAA0226	0.0397435	1.33931	0.346758
1554614_PM_a_at	polypyrimidine tract binding protein 2	PTBP2	0.904794	1.21045	0.872237
1554615_PM_at	NULL /// NULL	OTTHUMG00000169818 /// RP11-43D4.3	0.601578	0	0.146428
1554616_PM_at	serpin peptidase inhibitor, clade B (ovalbumin), member 8	SERPINB8	1.10957	0	0.224692
1554618_PM_at	ArfGAP with FG repeats 2	AGFG2	0.744004	0.39138	0.549747
1554619_PM_at	metallo-beta-lactamase domain containing 2	MBLAC2	0.200164	1.55927	0.105958
1554621_PM_at	diacylglycerol kinase, epsilon 64kDa	DGKE	1.14538	0.369226	0.793589
1554623_PM_x_at	diacylglycerol kinase, epsilon 64kDa	DGKE	0.565556	0.987947	0.890588
1554624_PM_a_at	signal-regulatory protein beta-1 isoform 3-like /// signal-regulatory protein beta-1-like /// signal-regulatory protein beta 1	LOC100653194 /// LOC100653231 /// SIRPB1	0.221125	0	0.548937
1554625_PM_at	B-cell CLL/lymphoma 6, member B	BCL6B	0.516125	0.177551	1.19133
1554627_PM_a_at	activating signal cointegrator 1 complex subunit 1	ASCC1	1.41473	1.10873	2.25056
1554628_PM_at	zinc finger protein 57	ZNF57	1.06508	0.467755	1.30804
1554629_PM_at	EPH receptor A7	EPHA7	0.375139	0.689888	0.125809
1554631_PM_at	ataxia telangiectasia mutated	ATM	0.184053	0.569802	0.868783
1554633_PM_a_at	myelin transcription factor 1-like	MYT1L	0.576025	0	0.088665
1554634_PM_at	PDS5, regulator of cohesion maintenance, homolog B (S. cerevisiae)	PDS5B	0.275432	0	0.0829046
1554635_PM_a_at	neuronal PAS domain protein 3	NPAS3	0.706914	0	0.0237388
1554636_PM_at	---	---	0.814381	0.480761	0.661535
1554637_PM_a_at	core-binding factor, runt domain, alpha subunit 2; translocated to, 2	CBFA2T2	1.50267	0	0.705778
1554638_PM_at	zinc finger, FYVE domain containing 16	ZFYVE16	0.533835	1.37426	0.496399
1554640_PM_at	paralemmin 2	PALM2	1.37429	0.448266	1.53458
1554641_PM_a_at	tet methylcytosine dioxygenase 3	TET3	1.10806	0.937275	0.643292
1554642_PM_at	ring finger protein 32	RNF32	0.853914	1.79611	1.11105
1554643_PM_at	regulator of G-protein signaling 11	RGS11	0.422967	0.103406	0.741846
1554646_PM_at	oxysterol binding protein-like 1A	OSBPL1A	1.00916	1.72902	1.14573
1554648_PM_a_at	dual oxidase maturation factor 1	DUOXA1	1.42834	0.709699	1.58627
1554649_PM_at	---	---	1.57814	0.783553	1.80861
1554650_PM_a_at	---	---	0.712492	0	0.211432
1554652_PM_s_at	microtubule associated serine/threonine kinase family member 4	MAST4	1.37219	0.709212	1.32632
1554655_PM_a_at	reprimo-like	RPRML	0.65364	0.47768	0.128008
1554657_PM_a_at	chromosome 20 open reading frame 26	C20orf26	1.37146	0.652198	1.59157
1554659_PM_at	NIMA-related kinase 4	NEK4	0.479061	0.250608	0.354789
1554660_PM_a_at	consortin, connexin sorting protein	CNST	0.513047	0	0.0779081
1554661_PM_s_at	consortin, connexin sorting protein	CNST	0.732863	0	0.862897
1554662_PM_at	chromosome 17 open reading frame 47	C17orf47	0.820218	0	0.91153
1554663_PM_a_at	nuclear mitotic apparatus protein 1	NUMA1	0.37148	0	0.164655
1554664_PM_at	nuclear apoptosis inducing factor 1	NAIF1	0.658615	0.336936	1.00385
1554665_PM_at	zinc finger protein 586	ZNF586	0.580076	0	0.974965
1554666_PM_at	uncharacterized LOC100130950	LOC100130950	0.295344	0.323433	0.405676
1554667_PM_s_at	methyltransferase like 8	METTL8	0.775233	0.831366	1.31143
1554668_PM_a_at	family with sequence similarity 151, member A	FAM151A	1.11059	0.927646	0.892576
1554670_PM_at	golgi-associated, gamma adaptin ear containing, ARF binding protein 1	GGA1	0.608469	0	0.494629
1554671_PM_a_at	serine/arginine repetitive matrix 2	SRRM2	0.689752	2.47626	0.803131
1554672_PM_at	tetratricopeptide repeat domain 26	TTC26	1.25731	0.954639	0.0578178
1554675_PM_a_at	synaptonemal complex central element protein 1	SYCE1	1.60576	0	1.13615
1554676_PM_at	serglycin	SRGN	0.656588	0.847208	0.497152
1554677_PM_s_at	CKLF-like MARVEL transmembrane domain containing 4	CMTM4	0.735185	0	0.853508
1554678_PM_s_at	heterogeneous nuclear ribonucleoprotein D-like	HNRNPDL	1.19911	0	0.94172
1554679_PM_a_at	lysosomal protein transmembrane 4 beta	LAPTM4B	0.670133	0.552855	0.798563
1554680_PM_s_at	potassium voltage-gated channel, delayed-rectifier, subfamily S, member 2	KCNS2	0.588223	0.472733	0.692222
1554681_PM_a_at	uncharacterized MGC50722	MGC50722	1.71756	0.494492	2.07924
1554683_PM_a_at	uncharacterized LOC101060651 /// uncharacterized MGC50722	LOC101060651 /// MGC50722	1.67384	0	1.97403
1554685_PM_a_at	KIAA1199	KIAA1199	1.49406	0.434959	1.631
1554686_PM_at	staufen double-stranded RNA binding protein 2	STAU2	0.588296	0	1.23601
1554689_PM_a_at	neuroligin 4, X-linked	NLGN4X	0.842557	0.56351	0.00954837
1554690_PM_a_at	transforming, acidic coiled-coil containing protein 1	TACC1	1.46831	0.302873	1.33808
1554691_PM_a_at	protein kinase C and casein kinase substrate in neurons 2	PACSIN2	1.18302	0	0.265236
1554692_PM_at	solute carrier family 23 (nucleobase transporters), member 2	SLC23A2	1.3149	0.261388	1.63554
1554694_PM_at	cyclin Y	CCNY	0.56118	0	0.8661
1554696_PM_s_at	thymidylate synthetase	TYMS	0.817162	1.03713	0.55167
1554697_PM_at	ADAM metallopeptidase with thrombospondin type 1 motif, 9	ADAMTS9	1.16385	0.4968	1.31816
1554699_PM_at	l(3)mbt-like 4 (Drosophila)	L3MBTL4	0.188831	1.49028	0.0578813
1554700_PM_at	cadherin 7, type 2	CDH7	0.343962	0	0.279939
1554701_PM_a_at	TBC1 domain family, member 16	TBC1D16	1.13439	0.719239	0.948635
1554702_PM_at	sodium leak channel, non-selective	NALCN	0.305612	0	0.485478
1554703_PM_at	Rho guanine nucleotide exchange factor (GEF) 10	ARHGEF10	0.114187	0	0.145137
1554704_PM_at	ATPase, aminophospholipid transporter, class I, type 8B, member 3	ATP8B3	0.431524	0	0.223963
1554705_PM_at	scavenger receptor class A, member 5 (putative)	SCARA5	1.29234	0	1.29252
1554706_PM_at	olfactory receptor, family 2, subfamily L, member 13	OR2L13	0.932187	0	0.85008
1554707_PM_at	spermatogenesis associated 6-like	SPATA6L	1.00188	0.45787	1.29902
1554708_PM_s_at	spermatogenesis associated 6-like	SPATA6L	0.296199	0.656607	0.749215
1554710_PM_at	potassium large conductance calcium-activated channel, subfamily M, beta member 1	KCNMB1	1.51344	0.148601	1.59792
1554711_PM_at	calcium homeostasis modulator 3	CALHM3	0.504822	0.324816	0.128253
1554712_PM_a_at	glycine-N-acyltransferase-like 2	GLYATL2	1.58593	0.402091	1.85382
1554714_PM_at	RELT-like 1	RELL1	0.343617	0.862073	0.288714
1554715_PM_at	long intergenic non-protein coding RNA 593	LINC00593	1.08292	0	1.66312
1554716_PM_s_at	long intergenic non-protein coding RNA 593	LINC00593	1.31783	1.24799	0.98081
1554717_PM_a_at	phosphodiesterase 4D, cAMP-specific	PDE4D	0.374945	0	0.901508
1554719_PM_at	NADH dehydrogenase (ubiquinone) 1 alpha subcomplex, 10, 42kDa	NDUFA10	0.808926	1.2677	1.06654
1554721_PM_a_at	TAF2 RNA polymerase II, TATA box binding protein (TBP)-associated factor, 150kDa	TAF2	0.999753	0	0.838587
1554722_PM_at	transient receptor potential cation channel, subfamily M, member 3	TRPM3	0.675261	0.673875	0.454159
1554723_PM_x_at	---	---	1.15648	1.63381	1.14509
1554724_PM_at	solute carrier family 6 (neurotransmitter transporter, GABA), member 11	SLC6A11	0.0578082	1.27608	0.483231
1554725_PM_at	RAB GTPase activating protein 1-like	RABGAP1L	0.951044	0.944985	0.854338
1554726_PM_at	zinc finger protein 655	ZNF655	0.599097	0	0.370901
1554728_PM_at	solute carrier family 9, subfamily A (NHE1, cation proton antiporter 1), member 1	SLC9A1	1.47048	1.27283	1.3772
1554730_PM_at	multiple C2 domains, transmembrane 1	MCTP1	0.961251	0	0.789226
1554732_PM_at	uncharacterized LOC728175	LOC728175	0.429188	0.653545	1.02277
1554733_PM_at	uncharacterized LOC728175	LOC728175	0.647945	1.98019	0.34227
1554735_PM_a_at	tripartite motif containing 7	TRIM7	0.703768	0	1.19961
1554736_PM_at	Rho GTPase activating protein 29	ARHGAP29	0.758738	0	0.54913
1554737_PM_at	fibrillin 2	FBN2	0.577033	0.304542	0.107159
1554739_PM_at	intracisternal A particle-promoted polypeptide	IPP	0.253948	0	0.489689
1554740_PM_a_at	intracisternal A particle-promoted polypeptide	IPP	1.49508	0.841216	1.00611
1554741_PM_s_at	fibroblast growth factor 7 /// fibroblast growth factor 7 pseudogene /// keratinocyte growth factor-like protein 2	FGF7 /// KGFLP1 /// KGFLP2	0.149417	0.55574	0.424223
1554742_PM_at	PMS1 postmeiotic segregation increased 1 (S. cerevisiae)	PMS1	0.832856	0	0.488257
1554743_PM_x_at	PMS1 postmeiotic segregation increased 1 (S. cerevisiae)	PMS1	1.30931	1.22728	1.31364
1554744_PM_at	caspase recruitment domain family, member 16	CARD16	1.01578	0	1.50027
1554745_PM_at	Ral GEF with PH domain and SH3 binding motif 1	RALGPS1	0.306537	0	0.34036
1554747_PM_a_at	septin 2	2002-09-01	0.430107	1.11363	0.528092
1554748_PM_at	chloride channel, voltage-sensitive Kb	CLCNKB	0.863124	1.26851	0.991059
1554749_PM_s_at	chloride channel, voltage-sensitive Kb	CLCNKB	0.611593	1.07611	0.894505
1554751_PM_at	---	---	0.986548	0.602895	1.38647
1554752_PM_a_at	---	---	0.995965	1.89327	1.30647
1554755_PM_a_at	microtubule associated tumor suppressor candidate 2	MTUS2	1.36075	0.563438	1.40289
1554757_PM_a_at	inositol polyphosphate-5-phosphatase, 40kDa	INPP5A	0.553283	0	0.100184
1554758_PM_a_at	CD99 molecule-like 2	CD99L2	0.279279	0.530389	0.773453
1554759_PM_at	SRC kinase signaling inhibitor 1	SRCIN1	0.738673	0.652778	0.469022
1554761_PM_a_at	HEAT repeat containing 2	HEATR2	0.93402	0	0.210134
1554762_PM_a_at	claudin 22 /// WW and C2 domain containing 2	CLDN22 /// WWC2	0.62779	1.17785	0.787187
1554763_PM_at	ubiquitin-conjugating enzyme E2D N-terminal like (pseudogene)	UBE2DNL	1.42971	0	1.36863
1554764_PM_a_at	long intergenic non-protein coding RNA 301	LINC00301	2.01262	0.341125	1.7209
1554765_PM_a_at	long intergenic non-protein coding RNA 301	LINC00301	1.13254	0.659042	1.5407
1554766_PM_s_at	---	---	0.886266	1.21406	1.25811
1554767_PM_s_at	crystallin, zeta (quinone reductase)-like 1	CRYZL1	0.506634	0.802651	0.360153
1554768_PM_a_at	MAD2 mitotic arrest deficient-like 1 (yeast)	MAD2L1	1.29182	0	0.988376
1554769_PM_at	zinc finger protein 785	ZNF785	0.283348	0	0.807708
1554770_PM_x_at	zinc finger protein 785	ZNF785	0.556135	0.45745	0.218825
1554771_PM_at	NULL /// NULL	OTTHUMG00000176280 /// RP11-690I21.2	1.15109	0.626256	0.903858
1554772_PM_at	EF-hand calcium binding domain 13	EFCAB13	0.60491	0.54327	0.0327884
1554773_PM_at	WAP, follistatin/kazal, immunoglobulin, kunitz and netrin domain containing 2	WFIKKN2	0.64557	0.838747	0.0820923
1554774_PM_at	MYC induced nuclear antigen	MINA	0.926988	0.455502	0.960177
1554776_PM_at	ZFP42 zinc finger protein	ZFP42	1.0282	0	1.14074
1554777_PM_at	ZFP42 zinc finger protein	ZFP42	1.32018	0.694252	1.5975
1554778_PM_at	pleckstrin homology-like domain, family B, member 2	PHLDB2	0.102354	0.459984	0.0605763
1554779_PM_s_at	pleckstrin homology-like domain, family B, member 2	PHLDB2	0.31654	0	0.326012
1554780_PM_a_at	putative homeodomain transcription factor 2	PHTF2	0.962394	0	0.674674
1554781_PM_at	uncharacterized LOC153163	MGC32805	0.473862	1.45519	0.590447
1554782_PM_at	KLHL30 antisense RNA 1	KLHL30-AS1	0.775277	1.1003	0.144797
1554783_PM_s_at	Rho/Rac guanine nucleotide exchange factor (GEF) 2	ARHGEF2	0.467091	0	0.220104
1554784_PM_at	contactin 1	CNTN1	0.37613	0	0.341077
1554785_PM_at	coiled-coil domain containing 82	CCDC82	1.38107	0	0.516061
1554786_PM_at	Cas scaffolding protein family member 4	CASS4	1.68925	0	2.06924
1554787_PM_at	chromosome 9 open reading frame 96	C9orf96	0.608886	1.92872	0.906044
1554789_PM_a_at	phosphodiesterase 8B	PDE8B	1.22742	1.09658	1.3672
1554790_PM_at	zinc finger and SCAN domain containing 20	ZSCAN20	1.0132	0	1.06336
1554791_PM_a_at	KAT8 regulatory NSL complex subunit 1-like	KANSL1L	1.55513	0	0.870512
1554793_PM_at	ubiquitin protein ligase E3C	UBE3C	0.44194	0.508448	0.577739
1554794_PM_a_at	ubiquitin protein ligase E3C	UBE3C	0.910149	0	1.43007
1554795_PM_a_at	filamin binding LIM protein 1	FBLIM1	1.34495	0.797909	1.35745
1554796_PM_at	dipeptidyl-peptidase 6	DPP6	0.439639	0	0.337812
1554797_PM_at	synaptotagmin XVI	SYT16	1.65895	0	0.93959
1554798_PM_at	sushi, nidogen and EGF-like domains 1	SNED1	0.467024	1.22777	0.17903
1554800_PM_at	RAB39A, member RAS oncogene family	RAB39A	1.28924	0.939501	1.39333
1554801_PM_at	fibronectin type III domain containing 9	FNDC9	1.07009	1.02951	1.21228
1554803_PM_s_at	tripartite motif containing 72	TRIM72	0.758287	0.254953	0.164227
1554804_PM_a_at	claudin 19	CLDN19	0.357829	0.849392	0.281886
1554805_PM_at	claudin 19	CLDN19	0.18826	0.776107	0.0224058
1554806_PM_a_at	F-box protein 8	FBXO8	0.96765	1.36852	0.0501283
1554807_PM_a_at	spire homolog 1 (Drosophila)	SPIRE1	1.06166	0.537018	0.764496
1554808_PM_at	acid phosphatase 1, soluble	ACP1	0.713427	0	0.580097
1554809_PM_at	uncharacterized LOC389199	LOC389199	1.52743	0	1.6752
1554810_PM_at	phospholipase A2, group IVC (cytosolic, calcium-independent)	PLA2G4C	0.533257	1.22207	0.800242
1554812_PM_at	claudin 20	CLDN20	0.632884	0	0.0317594
1554813_PM_at	---	---	1.68295	0	1.43076
1554814_PM_at	ubiquitin-conjugating enzyme E2O	UBE2O	0.872418	0.748133	0.593383
1554816_PM_at	astrotactin 2	ASTN2	0.321526	1.32697	0.102493
1554818_PM_s_at	double zinc ribbon and ankyrin repeat domains 1	DZANK1	1.03697	1.10756	0.375531
1554819_PM_a_at	integrin, alpha 11	ITGA11	1.04273	0	0.730533
1554820_PM_at	ATP/GTP binding protein-like 3	AGBL3	0.63386	0	0.909607
1554821_PM_a_at	zinc finger, BED-type containing 1	ZBED1	0.872529	0.483295	0.624357
1554822_PM_at	putative homeodomain transcription factor 2	PHTF2	0.67156	0.257767	0.221379
1554824_PM_at	zinc finger protein 585A	ZNF585A	0.418942	1.5517	0.0143622
1554825_PM_at	---	---	0.966215	0.48942	0.783793
1554826_PM_at	cyclin-dependent kinase 15	CDK15	0.504504	0.635255	0.0155006
1554827_PM_a_at	adenylate cyclase 7	ADCY7	0.663227	0.91873	0.289052
1554828_PM_at	platelet-derived growth factor receptor, alpha polypeptide	PDGFRA	0.808063	0.21498	0.395647
1554830_PM_a_at	STEAP family member 3, metalloreductase	STEAP3	0.53125	0.599035	0.639177
1554831_PM_x_at	amyotrophic lateral sclerosis 2 (juvenile) chromosome region, candidate 11	ALS2CR11	1.30155	0	0.808395
1554833_PM_at	multiple C2 domains, transmembrane 2	MCTP2	0.764001	0.313562	0.871213
1554834_PM_a_at	Ras association (RalGDS/AF-6) domain family member 5	RASSF5	1.26136	0	1.60117
1554835_PM_a_at	UDP-GlcNAc:betaGal beta-1,3-N-acetylglucosaminyltransferase 5	B3GNT5	0.310118	0	0.284739
1554836_PM_at	ubiquitin specific peptidase 36	USP36	1.14198	0	0.550382
1554837_PM_a_at	cytochrome P450, family 4, subfamily A, polypeptide 11 /// cytochrome P450, family 4, subfamily A, polypeptide 22	CYP4A11 /// CYP4A22	1.3764	0	1.75407
1554839_PM_at	cell death-inducing DFFA-like effector c pseudogene	CIDECP	0.731912	0	1.28775
1554840_PM_at	anti-CNG alpha 1 cation channel translation product-like	LOC280665	0.585604	0.746193	1.46186
1554841_PM_at	methylenetetrahydrofolate dehydrogenase (NADP+ dependent) 2-like	MTHFD2L	0.956758	0.567566	1.45798
1554842_PM_at	solute carrier family 12 (sodium/potassium/chloride transporters), member 1	SLC12A1	1.07201	0.615469	1.38967
1554844_PM_at	eyes absent homolog 3 (Drosophila)	EYA3	0.639038	0.551049	0.336508
1554846_PM_at	coiled-coil domain containing 158	CCDC158	1.19908	2.09477	0.85785
1554847_PM_at	ATPase, H+ transporting, lysosomal 56/58kDa, V1 subunit B1	ATP6V1B1	1.33342	0.720014	1.59077
1554849_PM_at	torsin family 1, member A (torsin A)	TOR1A	0.737337	1.04909	0.294743
1554850_PM_at	von Willebrand factor A domain containing 5B2	VWA5B2	1.63337	0	1.30507
1554852_PM_a_at	KIAA1257	KIAA1257	1.45786	0.503001	1.68675
1554853_PM_at	cytochrome P450, family 2, subfamily U, polypeptide 1	CYP2U1	1.13044	0.88468	0.650781
1554855_PM_at	parkinson protein 2, E3 ubiquitin protein ligase (parkin)	PARK2	1.63851	0.571053	1.76532
1554857_PM_at	engulfment and cell motility 2	ELMO2	1.17179	0.728632	0.707471
1554860_PM_at	protein tyrosine phosphatase, non-receptor type 7	PTPN7	0.674006	0	0.978474
1554862_PM_at	cytidine monophospho-N-acetylneuraminic acid hydroxylase, pseudogene	CMAHP	1.14537	0.0411289	0.687767
1554863_PM_s_at	docking protein 5	DOK5	0.324518	0.95036	0.0890698
1554864_PM_a_at	syndecan 3	SDC3	0.711904	1.08137	0.603952
1554865_PM_at	---	---	0.431721	1.74741	0.481946
1554866_PM_at	transmembrane protein 135	TMEM135	0.893131	1.46993	1.50603
1554867_PM_a_at	proline rich 16	PRR16	0.737819	1.15451	1.03868
1554868_PM_s_at	PEST proteolytic signal containing nuclear protein	PCNP	0.36719	0.184953	0.177518
1554869_PM_at	WD repeat domain 37	WDR37	1.63564	0.648972	1.70397
1554871_PM_at	---	---	0.529333	0	0.87984
1554872_PM_a_at	3-hydroxymethyl-3-methylglutaryl-CoA lyase-like 1	HMGCLL1	0.870557	1.65401	1.03766
1554873_PM_at	centrosome and spindle pole associated protein 1	CSPP1	1.18798	0.434398	1.75444
1554874_PM_at	microphthalmia-associated transcription factor	MITF	0.511047	1.73328	1.11272
1554875_PM_at	calmodulin-lysine N-methyltransferase	CAMKMT	0.536313	0	0.110287
1554876_PM_a_at	S100 calcium binding protein Z	S100Z	1.02207	1.98554	0.501184
1554878_PM_a_at	ATP-binding cassette, sub-family D (ALD), member 3	ABCD3	1.76599	1.39995	2.37819
1554880_PM_at	uncharacterized LOC26070	DKFZP434K028	0.538591	0.640282	0.131834
1554882_PM_at	excision repair cross-complementing rodent repair deficiency, complementation group 8	ERCC8	0.403925	0.799983	0.176398
1554883_PM_a_at	excision repair cross-complementing rodent repair deficiency, complementation group 8	ERCC8	0.424565	0.792008	0.254316
1554884_PM_at	DNA primase large subunit-like /// primase, DNA, polypeptide 2 (58kDa)	LOC100996481 /// PRIM2	0.667486	0	0.0857332
1554885_PM_a_at	DNA primase large subunit-like /// primase, DNA, polypeptide 2 (58kDa)	LOC100996481 /// PRIM2	0.327029	1.56887	0.66899
1554886_PM_a_at	MLX interacting protein	MLXIP	0.297036	0.964637	0.362958
1554887_PM_at	---	---	1.37077	0.920535	1.02037
1554889_PM_at	TIA1 cytotoxic granule-associated RNA binding protein	TIA1	1.12742	0.627382	0.965234
1554890_PM_a_at	TIA1 cytotoxic granule-associated RNA binding protein	TIA1	1.36357	1.54245	0.591339
1554891_PM_at	---	---	1.4284	1.64777	1.63813
1554892_PM_a_at	membrane-spanning 4-domains, subfamily A, member 3 (hematopoietic cell-specific)	MS4A3	0.733024	0.754465	0.187483
1554894_PM_a_at	pterin-4 alpha-carbinolamine dehydratase/dimerization cofactor of hepatocyte nuclear factor 1 alpha (TCF1) 2	PCBD2	0.234944	0	0.214568
1554895_PM_a_at	rhomboid, veinlet-like 2 (Drosophila)	RHBDL2	1.33822	0	1.46692
1554897_PM_s_at	rhomboid, veinlet-like 2 (Drosophila)	RHBDL2	0.299501	0.467757	0.330025
1554899_PM_s_at	Fc fragment of IgE, high affinity I, receptor for; gamma polypeptide	FCER1G	1.39774	1.95164	0.265207
1554901_PM_at	FGF2-associated protein GAFA1	GAFA1	1.19717	0	0.25468
1554903_PM_at	FERM domain containing 8	FRMD8	0.967849	0	1.15412
1554905_PM_x_at	FERM domain containing 8	FRMD8	1.26487	0	1.62077
1554906_PM_a_at	M-phase phosphoprotein 6	MPHOSPH6	1.1013	0	0.901205
1554907_PM_a_at	HYDIN, axonemal central pair apparatus protein /// HYDIN2, axonemal central pair apparatus protein (pseudogene) /// hydrocephalus-inducing protein homolog	HYDIN /// HYDIN2 /// LOC101060699	1.86246	0.343669	0.485647
1554908_PM_at	HYDIN, axonemal central pair apparatus protein	HYDIN	0.657921	0.999575	1.21637
1554909_PM_at	coiled-coil domain containing 36	CCDC36	0.425268	0.332554	0.39235
1554910_PM_at	protein kinase D3	PRKD3	0.339377	1.11388	0.411411
1554911_PM_at	ATP-binding cassette, sub-family C (CFTR/MRP), member 11	ABCC11	1.09752	1.86804	1.05605
1554912_PM_at	extended synaptotagmin-like protein 3	ESYT3	1.52436	0	0.733125
1554914_PM_at	phospholipase A2, group IVD (cytosolic)	PLA2G4D	0.43217	0.37011	0.476065
1554915_PM_a_at	phosphodiesterase 12	PDE12	1.2504	1.31346	1.00081
1554916_PM_a_at	jerky homolog (mouse)	JRK	1.43721	0.340024	1.49511
1554918_PM_a_at	ATP-binding cassette, sub-family C (CFTR/MRP), member 4	ABCC4	0.372216	0.491603	0.829884
1554919_PM_s_at	chromosome 7 open reading frame 63	C7orf63	0.37925	0.343478	0.183512
1554920_PM_at	sciellin	SCEL	0.908113	0	0.13032
1554921_PM_a_at	sciellin	SCEL	0.687984	0	0.54929
1554922_PM_at	zinc finger protein 678	ZNF678	0.912277	1.96698	0.877338
1554923_PM_at	ankyrin repeat and sterile alpha motif domain containing 6	ANKS6	1.23132	0	0.645338
1554927_PM_at	long intergenic non-protein coding RNA 598	LINC00598	0.168613	0.740344	0.132275
1554929_PM_at	SIK family kinase 3	SIK3	0.738557	0.535076	0.423766
1554930_PM_a_at	fucosyltransferase 8 (alpha (1,6) fucosyltransferase)	FUT8	0.926291	1.09541	0.56717
1554931_PM_at	cytochrome P450, family 4, subfamily A, polypeptide 11	CYP4A11	0.991511	0.902631	0.478239
1554932_PM_at	zinc finger, SWIM-type containing 2	ZSWIM2	1.22291	0	0.911412
1554933_PM_at	PC4 and SFRS1 interacting protein 1	PSIP1	0.500098	0.814379	0.0509647
1554934_PM_at	regulator of chromosome condensation (RCC1) and BTB (POZ) domain containing protein 1	RCBTB1	0.313638	2.40304	0.603078
1554937_PM_x_at	exocyst complex component 3-like 1	EXOC3L1	1.75308	1.25486	1.53621
1554938_PM_a_at	acyl-CoA thioesterase 11	ACOT11	0.825882	0	0.531841
1554940_PM_a_at	uncharacterized LOC388882	LOC388882	0.361741	0.980959	0.167344
1554941_PM_at	kelch-like family member 14	KLHL14	1.96519	0.935876	0.429128
1554942_PM_a_at	kelch-like family member 14	KLHL14	0.463505	0.797694	1.03151
1554943_PM_at	villin 1	VIL1	1.51378	0	1.67372
1554945_PM_x_at	villin 1	VIL1	0.480754	0.467901	0.120747
1554946_PM_at	uncharacterized LOC100506465	LOC100506465	0.361784	0.851325	1.15035
1554947_PM_at	acetyl-CoA acetyltransferase 1	ACAT1	1.04292	1.51705	0.348757
1554948_PM_at	---	---	0.521662	0.73801	0.108634
1554949_PM_at	uncharacterized LOC554174	LOC554174	1.57614	0.225763	1.6692
1554950_PM_at	aggrecan	ACAN	1.23755	0.950104	0.63528
1554951_PM_at	---	---	1.43248	0.617558	0.25775
1554952_PM_s_at	NLR family, pyrin domain containing 12	NLRP12	0.784883	0.299839	0.108761
1554953_PM_a_at	chromosome 21 open reading frame 90	C21orf90	0.74181	0.734492	1.6679
1554954_PM_at	chromosome 21 open reading frame 90	C21orf90	0.805878	0.801775	0.37591
1554957_PM_at	NULL /// NULL	CTD-2337I7.1 /// OTTHUMG00000166784	0.960592	2.27985	1.37127
1554958_PM_at	zinc finger protein 641	ZNF641	0.382597	0.851921	0.911721
1554960_PM_at	chromosome 1 open reading frame 110	C1orf110	1.01028	0.905425	1.05882
1554961_PM_at	fibroblast growth factor receptor 4	FGFR4	0.43338	1.98727	0.357535
1554962_PM_a_at	fibroblast growth factor receptor 4	FGFR4	1.47523	0.304282	0.762821
1554963_PM_at	---	---	1.443	0	1.38859
1554964_PM_x_at	---	---	1.3763	0.575747	1.38223
1554965_PM_at	filamin A interacting protein 1-like	FILIP1L	0.529024	1.01637	0.907665
1554966_PM_a_at	filamin A interacting protein 1-like	FILIP1L	0.747978	1.3116	0.0828519
1554967_PM_at	DIP2 disco-interacting protein 2 homolog A (Drosophila)	DIP2A	0.766958	0.865698	0.405212
1554969_PM_x_at	DIP2 disco-interacting protein 2 homolog A (Drosophila)	DIP2A	0.625278	0.644983	0.497049
1554970_PM_at	protein disulfide isomerase-like, testis expressed	PDILT	0.581647	1.11172	0.57956
1554971_PM_at	OK/SW-CL.58	OK/SW-CL.58	0.420127	0.572407	0.88595
1554972_PM_at	---	---	0.536963	0.637315	0.766362
1554973_PM_a_at	zinc finger and BTB domain containing 26	ZBTB26	0.697128	1.28469	0.562029
1554974_PM_at	aspartoacylase (aminocyclase) 3	ACY3	0.654169	0.376732	0.00334053
1554976_PM_a_at	long intergenic non-protein coding RNA 51	LINC00051	1.77287	0.85314	2.24256
1554977_PM_at	chromosome 20 open reading frame 201	C20orf201	1.19539	0.549606	1.0332
1554978_PM_at	ERICH1 antisense RNA 1	ERICH1-AS1	0.568676	0	0.582813
1554980_PM_a_at	activating transcription factor 3	ATF3	0.0717328	0.60301	0.446743
1554981_PM_at	equatorin, sperm acrosome associated	EQTN	0.365232	1.11043	0.54415
1554982_PM_a_at	equatorin, sperm acrosome associated	EQTN	1.00762	0	0.791516
1554983_PM_at	long intergenic non-protein coding RNA 317	LINC00317	0.220784	1.04242	0.383516
1554984_PM_a_at	major histocompatibility complex, class II, DO beta	HLA-DOB	0.677563	0.68551	0.124744
1554985_PM_at	zinc finger protein 396	ZNF396	1.20115	0.567346	1.29174
1554986_PM_a_at	sorting nexin 19	SNX19	0.241953	1.59696	0.0311034
1554987_PM_at	golgin A3	GOLGA3	0.619184	0.423759	0.0251051
1554988_PM_at	solute carrier family 9, member C2 (putative)	SLC9C2	0.627819	1.35079	0.0399222
1554989_PM_at	apoptosis resistant E3 ubiquitin protein ligase 1	AREL1	0.0780646	1.07331	0.322073
1554992_PM_at	Ras protein-specific guanine nucleotide-releasing factor 1	RASGRF1	1.40527	1.17425	1.6715
1554994_PM_at	recombination activating gene 1	RAG1	1.00135	0.97894	0.124185
1554996_PM_at	zinc finger protein 479 /// zinc finger protein 733, pseudogene	ZNF479 /// ZNF733P	0.230853	1.1961	0.177757
1554997_PM_a_at	prostaglandin-endoperoxide synthase 2 (prostaglandin G/H synthase and cyclooxygenase)	PTGS2	1.23708	1.78487	1.71787
1554999_PM_at	RasGEF domain family, member 1B	RASGEF1B	0.703974	0	0.105814
1555000_PM_at	OK/SW-CL.36	OK/SW-CL.36	0.318849	0	0.0351719
1555001_PM_at	IQ motif containing F1	IQCF1	0.356719	0.518978	0.102612
1555002_PM_at	uncharacterized LOC403312	MGC39545	0.476614	0.876071	0.314221
1555003_PM_at	retinoblastoma-like 1 (p107)	RBL1	0.698117	1.39183	1.0781
1555004_PM_a_at	retinoblastoma-like 1 (p107)	RBL1	0.862681	0	0.857492
[truncated: 52,615 more rows]

## Sheet: S2 - Block 2 Sphingolipids
Table S2. MB-VIOP(OnPLS) and VIP(OPLS) values for Block 2 (Sphingolipid) variables.
Name	MB-VIOP Component 1 (Global)	MB-VIOP Component 2 (Local)	OPLS-DA VIP
S1P(d18:1)	1.05092	1.55822	0.742591
dh-S1P(d18:0)	0.960049	1.60756	0.759008
Sph(d18:1)	0.375098	2.25351	0.618174
dh-Sph(d18:0)	0.234405	2.19829	0.379808
Cer(C12:0)	0.850672	0.576116	0.739149
Cer(C14:0)	1.12191	0.924773	1.1252
Cer(C16:0)	1.05457	0.602358	1.40526
Cer(C18:1)	0.889862	1.03038	0.961656
Cer(C18:0)	1.06414	0.208898	1.35838
Cer(C20:0)	1.11987	0.184367	1.33108
Cer(C22:0)	1.1986	0.56759	1.28238
Cer(C24:1)	1.02777	0.471866	1.3147
Cer(C24:0)	1.08034	1.05656	1.21128
SM(C12:0)	1.55288	0.290079	1.01111
SM(C16:0)	1.3111	0.807479	1.31528
SM(C18:1)	1.55092	0.37236	1.26232
SM(C18:0)	1.50422	0.252697	1.31059
SM(C24:1)	1.16649	0.655407	1.1359
SM(C24:0)	0.84485	1.42979	1.25908
HexCer(C16:0)	0.583012	1.01348	0.95038
HexCer(C18:1)	0.354167	0.514037	0.489843
HexCer(C18:0)	0.493377	0.518896	0.516622
HexCer(C24:1)	0.199359	0.752014	0.33449
LacCer(C12:0)	0.776136	0.934267	0.209181
LacCer(C16:0)	1.03018	0.411044	0.876812
LacCer(C24:1)	0.810788	0.417508	0.683586
LacCer(C24:0)	0.946251	1.04606	0.977349
DhCer(C16:0)	1.00375	0.936701	0.693572

## Sheet: S3 - Block 3 Metabolomics
Table S3. MB-VIOP(OnPLS) and VIP(OPLS) values for Block 3 (Metabolomics) variables.
Metabolite Name	Metabolite Abbreviation	MB-VIOP Component 1 (Global)	MB-VIOP Component 2 (Local)	OPLS-DA VIP
Methionine	Met	0.569682	1.27323	0.616371
Histidine	His	0.272137	0.780908	0.117635
Caffeine	Caffeine	0.907906	0.3414	0.755896
Glutamate	Glu	0.63976	1.5518	0.889236
Phenylalanine	Phe	0.783552	1.2629	0.89713
Methylhistidine	Methylhistidine	1.0427	0.700895	1.79139
Ornithine	Orn	0.893777	0.653742	0.415188
Indole-3-acetate	Indole-3-acetate	0.515679	1.61883	0.866498
Glutamine	Gln	1.40771	1.01945	0.414377
Arginine	Arg	1.20474	0.90669	1.76753
Uridine	Uridine	0.857941	1.44412	0.563377
Linoleoyl ethanolamide	LEA	1.01625	0.831695	0.505655
Oleoyl ethanolamine	OEA	1.34764	0.658918	1.47622
Hexosylceramide(C16:0)	HexCer(C16:0)	0.996227	0.789929	0.931027
Lactosylceramide(C16:0)	LacCer(C16:0)	0.879946	0.615149	0.87233
Sphingosine(d18:1)	Sph(d18:1)	0.900992	1.25518	0.963326
Sphingosine-1-phosphate(d18:1)	S1P(d18:1)	1.11432	1.36376	1.62907
dehydro-Sphingosine-1-phosphate(d18:0)	dh-S1P(d18:0)	0.937387	1.38668	1.53213
Arachidonic acid	Arachidonic acid	1.30902	1.00364	0.00373058
Docosahexaenoic acid	DHA	1.57373	1.04117	0.580642
Lysophosphatidylcholine(C16:0)	LPC(C16:0)	1.15085	0.731197	1.30204
Lyso-Platelet activating factor(C16:0)	Lyso-PAF(C16:0)	0.161274	1.14541	0.308146
Stearidonic acid	Stearidonic acid	0.269536	0.773634	0.302397
Lysine	Lys	0.64578	0.897275	0.573627
Phenylacetylglutamine	Phenylacetylglutamine	0.374722	0.67168	0.133169
Paraxanthine	Paraxanthine	1.08255	0.617396	0.485896
Dodecanedioic acid	Dodecanedioic acid	0.591414	1.30795	1.04038
Piperine	Piperine	0.456131	0.832945	0.350864
Citrulline	Cit	1.27517	0.745132	0.593313
Cortisol	Cortisol	1.47581	0.492339	0.814639
Cortisone	Cortisone	1.46649	0.504782	1.35496
Pipecolate	Pipecolate	1.34505	0.615009	1.53168
Aspartylphenylalanine	Asp-Phe	1.03125	1.28052	1.25775
Prolylhydroxyproline	Pro-Hyp	0.809151	1.1782	0.975329
N-Acetylcarnosine	NAC	1.22065	0.719684	1.67564
Lysophosphatidylcholine(C18:0)	LPC(C18:0)	0.86815	0.760448	1.26243
Octanoylcarnitine	Carnitine(C8:0)	1.10363	0.558254	0.036042
Decanedioic acid	Decanedioic acid	0.692983	1.49861	0.864519
Glycocholate	Glycocholate	0.895489	1.48596	0.604661
HODE/EpOME	HODE/EpOME	0.631988	0.982701	0.840856
Oleate	Oleic acid	1.37746	1.02365	0.848293
Linoleic acid	Linoleic acid	1.32021	1.0606	0.380784
12-HETE	12-HETE	0.367431	1.60636	0.0841426
Taurodeoxycholate	Taurodeoxycholate	1.02895	0.630056	0.979842
Leucylleucine	Leu-Leu	1.2733	0.627068	1.18344
HWESASXX	HWESASXX	0.967038	0.553011	0.689706
Hypoxanthine	Hypoxanthine	0.731505	1.37404	1.2922
Xanthine	Xanthine	0.980659	0.854048	1.7095
Urate	Urate	1.00084	0.775192	0.679629
Theobromine	Theobromine	1.03625	0.50717	0.785559
Methylthioadenosine	MTA	1.13706	0.689629	1.19086
Kynurenine	Kynurenine	0.6541	0.832314	0.52842
dehydro-Sphingosine(d18:0)	dh-Sph(d18:0)	0.867128	1.06322	0.952088
Arachidonoyl Platelet activating factor(C16:0)	Arachidonoyl-PAF(C16:0)	0.321461	0.6387	0.588377
alpha-Linolenic acid	alpha-Linolenic acid	0.79165	1.09577	0.79808
Bilirubin	Bilirubin	0.5794	1.12278	0.788116
Methylcysteine	Methylcysteine	0.859862	1.4462	0.0992803
Platelet activating factor(C4:0)	PAF(C4:0)	1.47276	0.888334	0.0497832
Propionylcarnitine	Carnitine(C3:0)	0.418206	1.78416	0.275807
22-hydroxycholesterol	22-OH-cholesterol	1.39859	0.591776	1.69191
Methylxanthine	Methylxanthine	1.08529	0.53772	0.720534
Guanosine	Guanosine	0.449986	1.02866	0.592255
Asymmetric dimethylarginine	ADMA	1.18421	0.667959	1.54759
N-Palmitoyltaurine	N-Palmitoyltaurine	1.3465	1.05363	1.03303
Dehydroepiandrosterone-Sulfate	DHEA-S	1.39594	0.63868	1.99231
Taurine	Taurine	1.12882	0.770859	1.70328

## Sheet: S4 - Block 4 Fatty Acids
Table S4. MB-VIOP(OnPLS) and VIP(OPLS) values for Block 4 (Fatty Acid) variables.
Fatty Acid Name	MB-VIOP Component 1 (Global)	MB-VIOP Component 2 (Local)	OPLS-DA VIP
Myristoic acid	1.04064	No Contribution	1.11718
Pentadecanoic acid	0.97445	No Contribution	0.836079
Palmitoleic acid	1.14148	No Contribution	1.1898
Heptadecanoic acid	0.98126	No Contribution	0.746878
Linoleic acid	0.848098	No Contribution	0.75839
alpha-Linolenic acid	0.888537	No Contribution	0.929776
Arachidic acid	0.128542	No Contribution	0.0213608
Eicosenoic acid	0.91462	No Contribution	0.906571
Eicosadienoic acid	1.16698	No Contribution	1.22637
Dihomo-gamma-linolenic acid	1.22855	No Contribution	1.18193
Arachidonic acid	1.11265	No Contribution	1.1145
Eicosapentaenoic acid	0.490064	No Contribution	0.547818
Palmitic acid	1.25461	No Contribution	1.3131
Oleic acid	1.19017	No Contribution	1.28456

## Sheet: S5 - Block 5 Oxylipins
Table S5. MB-VIOP(OnPLS) and VIP(OPLS) values for Block 5 (Oxylipin) variables.
Oxylipin Name	MB-VIOP Component 1 (Global)	MB-VIOP Component 2 (Local)	OPLS-DA VIP
13-HODE	0.42986	1.33656	1.35333
9-HODE	0.695457	1.15407	1.45364
12(13)-EpOME	1.17126	1.31347	1.56165
12,13-DiHOME	0.811028	1.39053	1.4193
12-HETE	0.507453	1.00984	0.962681
15-HETE	0.587816	1.0439	0.877073
5-HETE	1.10251	0.734692	0.229663
9(10)-EpOME	1.35828	1.15119	1.56189
13-KODE	1.37808	0.416104	0.31408
12-HEPE	0.750572	1.0682	0.850414
14-HDoHE	1.03487	0.974309	0.865647
17-HDoHE	1.02035	0.955715	0.719701
14,15-DiHETE	1.19325	1.00139	1.29763
EKODE	0.110152	0.920687	0.121867
TXB2	1.07908	0.858194	1.16598
19,20-DiHDPA	1.8001	1.03904	1.71373
8-HETE	0.969314	1.00297	0.270639
11-HEPE	0.708691	1.05875	0.68378
8-HEPE	0.455501	1.03838	0.55242
11-HETE	0.487618	0.968121	0.873634
15-HETrE	0.632155	1.03142	0.624714
5,6-DiHETrE	0.848114	1.16796	0.760835
5-HEPE	0.860192	0.83688	0.452193
LTB4	0.358305	0.621735	0.481652
PGE1	0.464445	1.01376	1.00006
PGE2	0.874552	0.89963	0.990836
11,12-DiHETrE	1.56812	1.33864	1.12218
14,15-DiHETrE	1.45492	1.09333	0.961887
12-HHTrE	0.975176	0.890654	1.14154
LTE4	1.15007	0.652167	0.126274
8,9-DiHETrE	1.21638	0.99436	0.868239
17,18-DiHETE	1.22773	0.955177	1.21217
9-HOTrE	0.786169	1.0018	1.39755
13-HOTrE	0.346991	0.833008	1.18526
18-HEPE	0.382981	1.08595	0.895215
TXB3	1.55868	0.618199	1.02298
11-HEDE	0.706472	0.944336	1.14111
19-HETE	1.64872	0.808062	0.313534

## Sheet: S6 - Block 6 Clinical
Table S6. MB-VIOP(OnPLS) and VIP(OPLS) values for Block 6 (Clinical) variables.
Variable Name	MB-VIOP Component 1 (Global)	MB-VIOP Component 2 (Local)	OPLS-DA VIP
FEV1	1.41448	1.08934	2.02653
eNO	0.805207	1.08768	0.618262
IgE	1.48177	0.490175	1.33898
FER	1.11407	1.31576	1.65344
Reversibility	1.55316	0.740743	1.73076
PEFR	0.595243	0.609877	0.156172
Macrophage (BAL)	0.648006	1.1628	0.858938
Neutrophil (BAL)	1.14313	0.907665	1.14454
Eosinophil (BAL)	0.656457	1.36395	0.0450749
Lymphocytes (BAL)	0.955824	0.679199	1.22281
Th17 (PBMC)	1.43913	0.789324	0.745118
Th1 (PBMC)	0.557076	1.12001	0.269134
Th2 (PBMC)	1.13521	0.845329	0.0740811
Treg (PBMC)	0.329314	0.818948	0.505663
MAIT (PBMC)	1.44373	0.292275	1.75682
IL17 (Serum)	0.483959	1.08499	0.647869
IFNg (Serum)	0.945752	1.48238	0.591897
IL10 (Serum)	0.492319	1.31662	0.65245
IL12p70 (Serum)	0.996198	0.900218	1.28203
IL13 (Serum)	1.18635	0.291788	0.0273298
IL2 (Serum)	0.38064	1.07374	0.371462
IL5 (Serum)	0.802076	1.16126	0.487391
Vitamin D3	0.808871	1.17783	0.477864

## Sheet: S7 - Component 1 Rho Matrix
Table S7. Rho values for correlations between variables presented in Figure 5A (Component 1).
	Block	Metabolomics	Metabolomics	Metabolomics	Metabolomics	Metabolomics	Metabolomics	Metabolomics	Metabolomics	Metabolomics	Metabolomics	Metabolomics	Metabolomics	Metabolomics	Metabolomics	Metabolomics	Metabolomics	Metabolomics	Metabolomics	Metabolomics	Metabolomics	Metabolomics	Metabolomics	Metabolomics	Metabolomics	Metabolomics	Metabolomics	Metabolomics	Metabolomics	Metabolomics	Metabolomics	Metabolomics	Sphingolipids	Sphingolipids	Sphingolipids	Sphingolipids	Sphingolipids	Sphingolipids	Sphingolipids	Sphingolipids	Sphingolipids	Sphingolipids	Sphingolipids	Sphingolipids	Sphingolipids	Sphingolipids	Sphingolipids	Fatty Acids	Fatty Acids
Block	Variable	Methylhistidine	Gln	Arg	LEA	OEA	S1P(d18:1)	Arachidonic acid	DHA	LPC(C16:0)	Paraxanthine	Cit	Cortisol	Cortisone	Pipecolate	Asp-Phe	NAC	Carnitine(C8:0)	Oleic acid	Linoleic acid	Taurodeoxycholate	Leu-Leu	Urate	Theobromine	MTA	PAF(C4:0)	22-OH-cholesterol	Methylxanthine	ADMA	N-Palmitoyltaurine	DHEA-S	Taurine	S1P(d18:1)	Cer(C14:0)	Cer(C16:0)	Cer(C18:0)	Cer(C20:0)	Cer(C22:0)	Cer(C24:1)	Cer(C24:0)	SM(C12:0)	SM(C16:0)	SM(C18:1)	SM(C18:0)	SM(C24:1)	LacCer(C16:0)	DhCer(C16:0)	Myristoic acid	Palmitoleic acid
Metabolomics	Methylhistidine	1	-0.17787	-0.61942	0.12338	-0.26595	-0.42518	0.058159	0.33032	-0.55167	0.031992	0.16206	0.027273	0.1987	0.64201	-0.35291	0.65965	0.28515	-0.12253	0.07397	-0.38905	-0.3808	-0.26143	0.11688	-0.13947	0.059289	-0.43648	0	-0.57532	0.01548	0.5223	-0.65217	-0.17561	-0.37549	-0.41615	-0.32468	-0.36985	-0.31225	-0.29644	-0.20271	-0.18351	-0.32242	-0.28289	-0.3179	-0.18351	-0.3371	-0.51214	-0.26595	-0.28402
Metabolomics	Gln	-0.17787	1	0.39356	-0.083117	0.00056465	-0.18916	-0.17335	-0.47487	-0.17787	0.26729	0.43422	-0.34805	-0.31299	-0.099944	0.067194	0.082456	-0.35517	-0.17109	-0.2795	-0.16544	0.052632	0.19481	0.21062	0.26256	0.476	0.11914	0.23247	0.3013	-0.28999	-0.15528	0.071711	-0.064935	0.0062112	0.28402	0.017504	0.25692	0.16996	0.15754	0.079616	-0.18351	0.051383	-0.052513	-0.17899	0.033315	0.018634	0.12027	-0.084133	-0.033315
Metabolomics	Arg	-0.61942	0.39356	1	0.062338	0.35404	0.23433	0.058159	-0.2253	0.39243	0.14551	0.24788	-0.18571	-0.37922	-0.31338	0.13834	-0.52281	0.14625	0.36646	0.14399	0.16093	0.45924	0.2908	0.17109	0.3258	-0.001694	0.51327	0.14156	0.45455	0.1063	-0.65782	0.52908	0.19481	0.28176	0.51892	0.39921	0.607	0.37888	0.49633	0.35065	0.16657	0.48165	0.46584	0.43422	0.45116	0.26595	0.17561	0.32242	0.56635
Metabolomics	LEA	0.12338	-0.083117	0.062338	1	0.40779	-0.22727	0.66234	0.37403	0.32208	0.077399	-0.01039	0.42707	0.37594	0.47922	-0.1039	-0.019608	0.3039	0.39351	0.63247	-0.35455	-0.19363	-0.3013	-0.14545	0.020779	-0.098701	-0.048052	-0.1609	-0.48571	0.22394	0.071429	-0.40649	0.05974	0.024675	-0.10909	0.097403	0.023377	-0.020779	-0.19221	0.062338	-0.14286	-0.12338	0.048052	0.085714	-0.041558	-0.14545	-0.11558	0.28182	0.24416
Metabolomics	OEA	-0.26595	0.00056465	0.35404	0.40779	1	0.13269	0.55731	0.33258	0.61152	0.1517	0.24111	0.16104	0.051948	-0.083004	0.14399	-0.21053	0.2253	0.51666	0.27612	0.15867	0.15789	-0.26143	0.058159	0.24449	-0.15302	0.53924	0.14286	0.023377	0.4097	-0.43761	0.21513	0.34387	0.23546	0.32919	0.48391	0.34952	0.23772	0.28628	0.14173	0.15641	0.22868	0.51666	0.50198	0.16996	0.19142	0.14625	0.62281	0.66798
Metabolomics	S1P(d18:1)	-0.42518	-0.18916	0.23433	-0.22727	0.13269	1	-0.02428	0.017504	0.3913	-0.18885	-0.083004	-0.011688	0.027273	-0.29531	0.46584	-0.24737	-0.0028233	-0.18238	-0.214	0.46923	0.3808	0.21739	0.05703	0.1677	-0.17448	0.15189	0.18312	0.31688	0.31476	-0.55731	0.57651	0.32806	0.11124	0.21852	0.24562	0.18351	0.25918	0.16657	0.10559	0.28967	0.12253	0.15867	0.24337	-0.036702	0.37775	0.29193	0.070582	-0.047995
Metabolomics	Arachidonic acid	0.058159	-0.17335	0.058159	0.66234	0.55731	-0.02428	1	0.68718	0.46697	-0.21981	-0.055901	0.39221	0.31558	0.23772	0.19481	0.17368	0.21626	0.46019	0.46132	-0.20158	-0.30031	-0.26595	-0.24111	0.08978	-0.050254	0.0028233	-0.32987	-0.29221	0.2549	0.14625	-0.027668	0.35291	0.14737	0.10107	0.25805	0.14625	0.060418	0.036702	0.12366	-0.11237	-0.07284	0.10785	0.16657	-0.016375	-0.19142	0.18125	0.45567	0.28176
Metabolomics	DHA	0.33032	-0.47487	-0.2253	0.37403	0.33258	0.017504	0.68718	1	0.35968	-0.3065	-0.12479	0.21429	0.34545	0.42292	0.27499	0.23333	0.3642	0.41502	0.50423	-0.061547	-0.14345	-0.26708	-0.24111	-0.29531	-0.12705	-0.2061	-0.16623	-0.42857	0.22807	0.2332	-0.087521	0.39582	0.26256	-0.15302	0.094297	-0.17787	-0.19706	-0.12253	-0.037832	0.24562	0.038961	0.076228	0.28967	0.11688	0.12818	-0.12705	0.47036	0.16093
Metabolomics	LPC(C16:0)	-0.55167	-0.17787	0.39243	0.32208	0.61152	0.3913	0.46697	0.35968	1	-0.10217	-0.12931	0.22338	-0.028571	-0.18238	0.53698	-0.29298	0.15076	0.30999	0.21287	0.27612	0.060888	0.10898	-0.2332	0.02428	-0.29305	0.2987	0.051948	0.18831	0.36842	-0.4105	0.41841	0.38453	0.44664	0.33371	0.43535	0.31225	0.1677	0.14399	0.15867	0.31225	0.22868	0.32919	0.45793	0.097685	0.30209	0.46019	0.53021	0.36872
Metabolomics	Paraxanthine	0.031992	0.26729	0.14551	0.077399	0.1517	-0.18885	-0.21981	-0.3065	-0.10217	1	0.50052	-0.5098	-0.12255	-0.0072239	-0.17441	-0.092857	-0.040248	0.021672	-0.01548	0.00516	0.28571	0.30031	0.94634	0.20949	-0.075335	0.26729	0.84069	0.35784	0.28929	-0.24252	0.011352	0.12693	-0.18266	0.077399	0.05676	0.12487	0.19711	0.12693	0.12487	-0.19298	-0.054696	0.034056	-0.14345	-0.03612	-0.13725	-0.40351	-0.13725	0.12281
Metabolomics	Cit	0.16206	0.43422	0.24788	-0.01039	0.24111	-0.083004	-0.055901	-0.12479	-0.12931	0.50052	1	-0.45844	-0.29351	-0.20723	-0.11237	0.1386	-0.058159	0.067194	-0.038961	-0.055901	0.26316	0.2908	0.41276	0.36533	0.35065	0.18012	0.44935	0.22208	0.38906	-0.34161	0.14625	-0.00056465	-0.090909	0.10785	-0.034444	0.14173	0.19593	0.12818	0.12705	-0.26482	0.094297	-0.00056465	-0.096556	0.058159	-0.017504	-0.034444	-0.071711	0.10672
Metabolomics	Cortisol	0.027273	-0.34805	-0.18571	0.42707	0.16104	-0.011688	0.39221	0.21429	0.22338	-0.5098	-0.45844	1	0.69221	0.24935	-0.1026	-0.014035	0.10779	-0.17532	-0.1039	-0.062338	-0.14951	-0.22338	-0.33377	-0.22727	-0.33636	-0.36104	-0.32782	-0.50376	-0.20833	0.23506	-0.23636	-0.17922	-0.077922	-0.16234	-0.041558	-0.066234	-0.2039	-0.16494	-0.08961	-0.12597	-0.17403	-0.048052	0.053247	-0.10779	-0.067532	0.17922	0.04026	-0.1026
Metabolomics	Cortisone	0.1987	-0.31299	-0.37922	0.37594	0.051948	0.027273	0.31558	0.34545	-0.028571	-0.12255	-0.29351	0.69221	1	0.47662	-0.22208	0.24211	-0.2013	-0.20779	-0.0090909	-0.14026	0.13971	-0.24805	-0.093506	-0.30519	-0.071429	-0.44545	-0.049624	-0.57744	-0.31863	0.39481	-0.14416	0.050649	-0.13506	-0.37792	-0.22078	-0.31688	-0.28052	-0.35844	-0.18831	-0.22597	-0.27532	-0.27273	-0.14026	-0.1	0.08961	-0.1039	-0.02987	-0.2987
Metabolomics	Pipecolate	0.64201	-0.099944	-0.31338	0.47922	-0.083004	-0.29531	0.23772	0.42292	-0.18238	-0.0072239	-0.20723	0.24935	0.47662	1	-0.12818	0.38246	0.28741	0.087521	0.3179	-0.37662	-0.040248	-0.39018	-0.043478	-0.33597	-0.038961	-0.27724	-0.057143	-0.5974	-0.20124	0.5144	-0.53811	0.07284	-0.14737	-0.25353	-0.21852	-0.25805	-0.34387	-0.26595	-0.19142	-0.0073405	-0.12366	-0.1598	-0.12027	0.10107	0.068323	-0.48165	-0.0073405	-0.08865
Metabolomics	Asp-Phe	-0.35291	0.067194	0.13834	-0.1039	0.14399	0.46584	0.19481	0.27499	0.53698	-0.17441	-0.11237	-0.1026	-0.22208	-0.12818	1	-0.25789	0.16206	0.069452	0.028797	0.52682	0.24045	0.19706	0.011858	-0.020892	-0.12931	0.19368	0.20909	0.34156	0.38287	-0.26708	0.35065	0.345	0.49181	0.48391	0.41841	0.33597	0.34726	0.34613	0.36194	0.44325	0.41615	0.26256	0.41389	0.27724	0.42744	0.47487	0.21174	0.10333
Metabolomics	NAC	0.65965	0.082456	-0.52281	-0.019608	-0.21053	-0.24737	0.17368	0.23333	-0.29298	-0.092857	0.1386	-0.014035	0.24211	0.38246	-0.25789	1	-0.26842	-0.2386	-0.084211	-0.30877	-0.39643	-0.20702	-0.17719	-0.0035088	0.17895	-0.57719	-0.15583	-0.56842	-0.11176	0.42807	-0.50526	0.13158	-0.3807	-0.3193	-0.30526	-0.25263	-0.12632	-0.25614	-0.070175	-0.36667	-0.45263	-0.54035	-0.46491	-0.5	-0.42105	-0.27719	0.02807	-0.4807
Metabolomics	Carnitine(C8:0)	0.28515	-0.35517	0.14625	0.3039	0.2253	-0.0028233	0.21626	0.3642	0.15076	-0.040248	-0.058159	0.10779	-0.2013	0.28741	0.16206	-0.26842	1	0.41841	0.37436	0.11801	0.077399	-0.04009	0.20045	0.16431	-0.54489	0.24111	0.093506	-0.12597	0.3354	-0.18125	-0.26595	-0.12931	0.08865	0.1214	0.43986	0.28741	0.14399	0.2603	0.22078	0.4297	0.23772	0.52569	0.53473	0.29983	0.023151	-0.15189	0.2253	0.55167
Metabolomics	Oleic acid	-0.12253	-0.17109	0.36646	0.39351	0.51666	-0.18238	0.46019	0.41502	0.30999	0.021672	0.067194	-0.17532	-0.20779	0.087521	0.069452	-0.2386	0.41841	1	0.83512	-0.015246	0.1001	-0.28289	0.036702	0.15189	-0.075099	0.54037	-0.15455	0.050649	0.27967	-0.13043	0.029927	0.17448	0.21852	0.15302	0.36533	0.32355	0.26256	0.35404	0.32693	0.11914	0.33145	0.46584	0.48617	0.43986	-0.00056465	-0.22078	0.51779	0.7188
Metabolomics	Linoleic acid	0.07397	-0.2795	0.14399	0.63247	0.27612	-0.214	0.46132	0.50423	0.21287	-0.01548	-0.038961	-0.1039	-0.0090909	0.3179	0.028797	-0.084211	0.37436	0.83512	1	-0.0050819	0.13519	-0.40147	-0.027668	0.014116	0.012987	0.23433	-0.14416	-0.3026	0.31889	-0.025409	-0.26143	0.24111	0.15189	0.043478	0.19932	0.15189	0.22981	0.15528	0.37211	-0.00056465	0.22868	0.19932	0.29644	0.33597	0.0062112	-0.27386	0.35517	0.3834
Metabolomics	Taurodeoxycholate	-0.38905	-0.16544	0.16093	-0.35455	0.15867	0.46923	-0.20158	-0.061547	0.27612	0.00516	-0.055901	-0.062338	-0.14026	-0.37662	0.52682	-0.30877	0.11801	-0.015246	-0.0050819	1	0.66563	0.085263	0.16544	0.018634	-0.2061	0.28063	0.34805	0.27662	0.39732	-0.62394	0.23998	0.21062	0.14625	0.45906	0.34049	0.31564	0.43083	0.41389	0.41841	0.27273	0.41276	0.20949	0.36194	0.2253	0.38905	0.39243	0.067194	0.095426
Metabolomics	Leu-Leu	-0.3808	0.052632	0.45924	-0.19363	0.15789	0.3808	-0.30031	-0.14345	0.060888	0.28571	0.26316	-0.14951	0.13971	-0.040248	0.24045	-0.39643	0.077399	0.1001	0.13519	0.66563	1	0.2033	0.44272	-0.029928	-0.13106	0.32301	0.54902	0.22549	0.24643	-0.61197	0.35191	0.30031	0.21156	0.39112	0.24458	0.31476	0.39112	0.46749	0.42828	0.22188	0.59959	0.26729	0.41589	0.57276	0.61197	-0.11455	0.18266	0.25903
Metabolomics	Urate	-0.26143	0.19481	0.2908	-0.3013	-0.26143	0.21739	-0.26595	-0.26708	0.10898	0.30031	0.2908	-0.22338	-0.24805	-0.39018	0.19706	-0.20702	-0.04009	-0.28289	-0.40147	0.085263	0.2033	1	0.19593	0.20158	-0.24901	-0.14399	0.20519	0.61299	-0.001032	-0.17448	0.4105	-0.2716	0.10559	0.043478	0.051383	0.13495	-0.00056465	0.064935	0.019763	-0.02428	-0.086392	-0.12253	-0.11575	-0.067194	-0.092038	0.19142	-0.10333	-0.075099
Metabolomics	Theobromine	0.11688	0.21062	0.17109	-0.14545	0.058159	0.05703	-0.24111	-0.24111	-0.2332	0.94634	0.41276	-0.33377	-0.093506	-0.043478	0.011858	-0.17719	0.20045	0.036702	-0.027668	0.16544	0.44272	0.19593	1	0.31564	-0.075099	0.27837	0.82727	0.21039	0.27761	-0.31112	0.070582	0.022021	-0.24449	0.067194	0.12705	0.23659	0.30322	0.29644	0.26595	-0.10898	0.063806	0.14512	0.033315	0.13721	-0.047995	-0.31903	-0.27273	0.10333
Metabolomics	MTA	-0.13947	0.26256	0.3258	0.020779	0.24449	0.1677	0.08978	-0.29531	0.02428	0.20949	0.36533	-0.22727	-0.30519	-0.33597	-0.020892	-0.0035088	0.16431	0.15189	0.014116	0.018634	-0.029928	0.20158	0.31564	1	-0.0028233	0.51553	0.15714	0.32727	0.30031	-0.33032	0.12479	-0.16431	-0.031056	0.46132	0.6262	0.70864	0.72332	0.57199	0.54715	-0.20045	0.066064	0.35743	0.14625	0.071711	-0.22756	0.28628	0.0073405	0.25692
Metabolomics	PAF(C4:0)	0.059289	0.476	-0.001694	-0.098701	-0.15302	-0.17448	-0.050254	-0.12705	-0.29305	-0.075335	0.35065	-0.33636	-0.071429	-0.038961	-0.12931	0.17895	-0.54489	-0.075099	0.012987	-0.2061	-0.13106	-0.24901	-0.075099	-0.0028233	1	-0.027668	-0.016883	0.031169	-0.2549	0.10333	0.05703	0.036702	-0.076228	-0.017504	-0.37098	-0.214	-0.077357	-0.19029	-0.14173	-0.38453	-0.044608	-0.32242	-0.40824	-0.0084698	0.11688	0.14286	-0.43422	-0.39695
Metabolomics	22-OH-cholesterol	-0.43648	0.11914	0.51327	-0.048052	0.53924	0.15189	0.0028233	-0.2061	0.2987	0.26729	0.18012	-0.36104	-0.44545	-0.27724	0.19368	-0.57719	0.24111	0.54037	0.23433	0.28063	0.32301	-0.14399	0.27837	0.51553	-0.027668	1	0.27662	0.56623	0.35604	-0.49181	0.40711	0.15754	0.32129	0.62394	0.66234	0.66234	0.607	0.63636	0.41841	0.32129	0.57199	0.75946	0.58893	0.51892	0.30999	0.19029	0.26595	0.7188
Metabolomics	Methylxanthine	0	0.23247	0.14156	-0.1609	0.14286	0.18312	-0.32987	-0.16623	0.051948	0.84069	0.44935	-0.32782	-0.049624	-0.057143	0.20909	-0.15583	0.093506	-0.15455	-0.14416	0.34805	0.54902	0.20519	0.82727	0.15714	-0.016883	0.27662	1	0.18045	0.34572	-0.44286	0.18052	0.26234	-0.023377	0.21688	0.14286	0.17273	0.28312	0.21688	0.22338	0.1	0.23506	0.15714	0.12078	0.1961	0.34545	-0.058442	-0.18831	0.014286
Metabolomics	ADMA	-0.57532	0.3013	0.45455	-0.48571	0.023377	0.31688	-0.29221	-0.42857	0.18831	0.35784	0.22208	-0.50376	-0.57744	-0.5974	0.34156	-0.56842	-0.12597	0.050649	-0.3026	0.27662	0.22549	0.61299	0.21039	0.32727	0.031169	0.56623	0.18045	1	0.042312	-0.38571	0.67922	-0.16883	0.23636	0.37792	0.32208	0.38052	0.25195	0.31429	0.07013	0.18571	0.19221	0.27532	0.13247	0.14935	0.1039	0.36623	-0.097403	0.25455
Metabolomics	N-Palmitoyltaurine	0.01548	-0.28999	0.1063	0.22394	0.4097	0.31476	0.2549	0.22807	0.36842	0.28929	0.38906	-0.20833	-0.31863	-0.20124	0.38287	-0.11176	0.3354	0.27967	0.31889	0.39732	0.24643	-0.001032	0.27761	0.30031	-0.2549	0.35604	0.34572	0.042312	1	-0.45511	0.16202	0.53973	0.36636	0.50671	0.51703	0.46749	0.65738	0.5418	0.66151	0.2549	0.51909	0.45924	0.48607	0.26522	0.079463	0.019608	0.37461	0.40351
Metabolomics	DHEA-S	0.5223	-0.15528	-0.65782	0.071429	-0.43761	-0.55731	0.14625	0.2332	-0.4105	-0.24252	-0.34161	0.23506	0.39481	0.5144	-0.26708	0.42807	-0.18125	-0.13043	-0.025409	-0.62394	-0.61197	-0.17448	-0.31112	-0.33032	0.10333	-0.49181	-0.44286	-0.38571	-0.45511	1	-0.40824	-0.21513	-0.1214	-0.44438	-0.41728	-0.47713	-0.49294	-0.39469	-0.3563	-0.26934	-0.37775	-0.41841	-0.45116	-0.14625	-0.31338	-0.25127	-0.22191	-0.37324
Metabolomics	Taurine	-0.65217	0.071711	0.52908	-0.40649	0.21513	0.57651	-0.027668	-0.087521	0.41841	0.011352	0.14625	-0.23636	-0.14416	-0.53811	0.35065	-0.50526	-0.26595	0.029927	-0.26143	0.23998	0.35191	0.4105	0.070582	0.12479	0.05703	0.40711	0.18052	0.67922	0.16202	-0.40824	1	0.33258	0.47939	0.37662	0.29193	0.31564	0.214	0.31903	0.097685	0.31903	0.40373	0.36194	0.36081	0.3258	0.41502	0.32806	0.19593	0.25353
Sphingolipids	S1P(d18:1)	-0.17561	-0.064935	0.19481	0.05974	0.34387	0.32806	0.35291	0.39582	0.38453	0.12693	-0.00056465	-0.17922	0.050649	0.07284	0.345	0.13158	-0.12931	0.17448	0.24111	0.21062	0.30031	-0.2716	0.022021	-0.16431	0.036702	0.15754	0.26234	-0.16883	0.53973	-0.21513	0.33258	1	0.30548	0.3913	0.13947	0.14512	0.23772	0.2603	0.24675	0.21626	0.42631	0.14173	0.25918	0.25579	0.42067	0.0084698	0.45342	0.13269
Sphingolipids	Cer(C14:0)	-0.37549	0.0062112	0.28176	0.024675	0.23546	0.11124	0.14737	0.26256	0.44664	-0.18266	-0.090909	-0.077922	-0.13506	-0.14737	0.49181	-0.3807	0.08865	0.21852	0.15189	0.14625	0.21156	0.10559	-0.24449	-0.031056	-0.076228	0.32129	-0.023377	0.23636	0.36636	-0.1214	0.47939	0.30548	1	0.56409	0.55844	0.37888	0.26821	0.40486	0.31338	0.67363	0.69848	0.63411	0.68605	0.6454	0.55392	0.214	0.51779	0.4489
Sphingolipids	Cer(C16:0)	-0.41615	0.28402	0.51892	-0.10909	0.32919	0.21852	0.10107	-0.15302	0.33371	0.077399	0.10785	-0.16234	-0.37792	-0.25353	0.48391	-0.3193	0.1214	0.15302	0.043478	0.45906	0.39112	0.043478	0.067194	0.46132	-0.017504	0.62394	0.21688	0.37792	0.50671	-0.44438	0.37662	0.3913	0.56409	1	0.71993	0.82383	0.75494	0.84077	0.70412	0.29193	0.75268	0.60813	0.52795	0.61378	0.39921	0.47149	0.2908	0.43309
Sphingolipids	Cer(C18:0)	-0.32468	0.017504	0.39921	0.097403	0.48391	0.24562	0.25805	0.094297	0.43535	0.05676	-0.034444	-0.041558	-0.22078	-0.21852	0.41841	-0.30526	0.43986	0.36533	0.19932	0.34049	0.24458	0.051383	0.12705	0.6262	-0.37098	0.66234	0.14286	0.32208	0.51703	-0.41728	0.29193	0.13947	0.55844	0.71993	1	0.86335	0.75494	0.75155	0.67363	0.48955	0.52569	0.8227	0.77866	0.46697	0.1677	0.31112	0.53247	0.65782
Sphingolipids	Cer(C20:0)	-0.36985	0.25692	0.607	0.023377	0.34952	0.18351	0.14625	-0.17787	0.31225	0.12487	0.14173	-0.066234	-0.31688	-0.25805	0.33597	-0.25263	0.28741	0.32355	0.15189	0.31564	0.31476	0.13495	0.23659	0.70864	-0.214	0.66234	0.17273	0.38052	0.46749	-0.47713	0.31564	0.14512	0.37888	0.82383	0.86335	1	0.88368	0.89159	0.84077	0.20723	0.59345	0.68718	0.60813	0.53473	0.090909	0.31564	0.3563	0.5607
Sphingolipids	Cer(C22:0)	-0.31225	0.16996	0.37888	-0.020779	0.23772	0.25918	0.060418	-0.19706	0.1677	0.19711	0.19593	-0.2039	-0.28052	-0.34387	0.34726	-0.12632	0.14399	0.26256	0.22981	0.43083	0.39112	-0.00056465	0.30322	0.72332	-0.077357	0.607	0.28312	0.25195	0.65738	-0.49294	0.214	0.23772	0.26821	0.75494	0.75494	0.88368	1	0.8419	0.92547	0.084133	0.55054	0.53134	0.47826	0.42292	0.084133	0.30435	0.214	0.33936
Sphingolipids	Cer(C24:1)	-0.29644	0.15754	0.49633	-0.19221	0.28628	0.16657	0.036702	-0.12253	0.14399	0.12693	0.12818	-0.16494	-0.35844	-0.26595	0.34613	-0.25614	0.2603	0.35404	0.15528	0.41389	0.46749	0.064935	0.29644	0.57199	-0.19029	0.63636	0.21688	0.31429	0.5418	-0.39469	0.31903	0.2603	0.40486	0.84077	0.75155	0.89159	0.8419	1	0.84641	0.21965	0.72558	0.67363	0.60248	0.68154	0.19706	0.15415	0.32806	0.54037
Sphingolipids	Cer(C24:0)	-0.20271	0.079616	0.35065	0.062338	0.14173	0.10559	0.12366	-0.037832	0.15867	0.12487	0.12705	-0.08961	-0.18831	-0.19142	0.36194	-0.070175	0.22078	0.32693	0.37211	0.41841	0.42828	0.019763	0.26595	0.54715	-0.14173	0.41841	0.22338	0.07013	0.66151	-0.3563	0.097685	0.24675	0.31338	0.70412	0.67363	0.84077	0.92547	0.84641	1	0.049125	0.607	0.45793	0.48504	0.54376	0.070582	0.19255	0.24224	0.30774
Sphingolipids	SM(C12:0)	-0.18351	-0.18351	0.16657	-0.14286	0.15641	0.28967	-0.11237	0.24562	0.31225	-0.19298	-0.26482	-0.12597	-0.22597	-0.0073405	0.44325	-0.36667	0.4297	0.11914	-0.00056465	0.27273	0.22188	-0.02428	-0.10898	-0.20045	-0.38453	0.32129	0.1	0.18571	0.2549	-0.26934	0.31903	0.21626	0.67363	0.29193	0.48955	0.20723	0.084133	0.21965	0.049125	1	0.56635	0.69509	0.78769	0.43986	0.55505	-0.011858	0.49633	0.50311
Sphingolipids	SM(C16:0)	-0.32242	0.051383	0.48165	-0.12338	0.22868	0.12253	-0.07284	0.038961	0.22868	-0.054696	0.094297	-0.17403	-0.27532	-0.12366	0.41615	-0.45263	0.23772	0.33145	0.22868	0.41276	0.59959	-0.086392	0.063806	0.066064	-0.044608	0.57199	0.23506	0.19221	0.51909	-0.37775	0.40373	0.42631	0.69848	0.75268	0.52569	0.59345	0.55054	0.72558	0.607	0.56635	1	0.71767	0.75268	0.90401	0.67476	0.12931	0.36985	0.55167
Sphingolipids	SM(C18:1)	-0.28289	-0.052513	0.46584	0.048052	0.51666	0.15867	0.10785	0.076228	0.32919	0.034056	-0.00056465	-0.048052	-0.27273	-0.1598	0.26256	-0.54035	0.52569	0.46584	0.19932	0.20949	0.26729	-0.12253	0.14512	0.35743	-0.32242	0.75946	0.15714	0.27532	0.45924	-0.41841	0.36194	0.14173	0.63411	0.60813	0.8227	0.68718	0.53134	0.67363	0.45793	0.69509	0.71767	1	0.92095	0.67137	0.37098	0.053642	0.52456	0.84416
Sphingolipids	SM(C18:0)	-0.3179	-0.17899	0.43422	0.085714	0.50198	0.24337	0.16657	0.28967	0.45793	-0.14345	-0.096556	0.053247	-0.14026	-0.12027	0.41389	-0.46491	0.53473	0.48617	0.29644	0.36194	0.41589	-0.11575	0.033315	0.14625	-0.40824	0.58893	0.12078	0.13247	0.48607	-0.45116	0.36081	0.25918	0.68605	0.52795	0.77866	0.60813	0.47826	0.60248	0.48504	0.78769	0.75268	0.92095	1	0.67702	0.47149	0.064935	0.6646	0.78995
Sphingolipids	SM(C24:1)	-0.18351	0.033315	0.45116	-0.041558	0.16996	-0.036702	-0.016375	0.11688	0.097685	-0.03612	0.058159	-0.10779	-0.1	0.10107	0.27724	-0.5	0.29983	0.43986	0.33597	0.2253	0.57276	-0.067194	0.13721	0.071711	-0.0084698	0.51892	0.1961	0.14935	0.26522	-0.14625	0.3258	0.25579	0.6454	0.61378	0.46697	0.53473	0.42292	0.68154	0.54376	0.43986	0.90401	0.67137	0.67702	1	0.61829	-0.04009	0.27499	0.55505
Sphingolipids	LacCer(C16:0)	-0.3371	0.018634	0.26595	-0.14545	0.19142	0.37775	-0.19142	0.12818	0.30209	-0.13725	-0.017504	-0.067532	0.08961	0.068323	0.42744	-0.42105	0.023151	-0.00056465	0.0062112	0.38905	0.61197	-0.092038	-0.047995	-0.22756	0.11688	0.30999	0.34545	0.1039	0.079463	-0.31338	0.41502	0.42067	0.55392	0.39921	0.1677	0.090909	0.084133	0.19706	0.070582	0.55505	0.67476	0.37098	0.47149	0.61829	1	0.19029	0.1598	0.17674
Sphingolipids	DhCer(C16:0)	-0.51214	0.12027	0.17561	-0.11558	0.14625	0.29193	0.18125	-0.12705	0.46019	-0.40351	-0.034444	0.17922	-0.1039	-0.48165	0.47487	-0.27719	-0.15189	-0.22078	-0.27386	0.39243	-0.11455	0.19142	-0.31903	0.28628	0.14286	0.19029	-0.058442	0.36623	0.019608	-0.25127	0.32806	0.0084698	0.214	0.47149	0.31112	0.31564	0.30435	0.15415	0.19255	-0.011858	0.12931	0.053642	0.064935	-0.04009	0.19029	1	-0.077357	-0.083004
Fatty Acids	Myristoic acid	-0.26595	-0.084133	0.32242	0.28182	0.62281	0.070582	0.45567	0.47036	0.53021	-0.13725	-0.071711	0.04026	-0.02987	-0.0073405	0.21174	0.02807	0.2253	0.51779	0.35517	0.067194	0.18266	-0.10333	-0.27273	0.0073405	-0.43422	0.26595	-0.18831	-0.097403	0.37461	-0.22191	0.19593	0.45342	0.51779	0.2908	0.53247	0.3563	0.214	0.32806	0.24224	0.49633	0.36985	0.52456	0.6646	0.27499	0.1598	-0.077357	1	0.69057
Fatty Acids	Palmitoleic acid	-0.28402	-0.033315	0.56635	0.24416	0.66798	-0.047995	0.28176	0.16093	0.36872	0.12281	0.10672	-0.1026	-0.2987	-0.08865	0.10333	-0.4807	0.55167	0.7188	0.3834	0.095426	0.25903	-0.075099	0.10333	0.25692	-0.39695	0.7188	0.014286	0.25455	0.40351	-0.37324	0.25353	0.13269	0.4489	0.43309	0.65782	0.5607	0.33936	0.54037	0.30774	0.50311	0.55167	0.84416	0.78995	0.55505	0.17674	-0.083004	0.69057	1
Fatty Acids	Eicosadienoic acid	-0.33484	0.0062112	0.46697	-0.038961	0.56522	0.1485	0.14286	0.12592	0.41841	0.05676	-0.053642	-0.050649	-0.049351	-0.055901	0.1022	-0.24737	0.13495	0.30548	0.087521	0.15754	0.37255	-0.16657	-0.010728	0.15641	-0.214	0.61717	0.16104	0.18701	0.32508	-0.33032	0.49181	0.47487	0.61604	0.58893	0.65669	0.55054	0.35404	0.53021	0.28515	0.59684	0.63523	0.77075	0.74139	0.57199	0.46132	0.033315	0.66234	0.68379
Fatty Acids	Dihomo-gamma-linolenic acid	-0.33823	0.068323	0.46245	0.061039	0.52117	0.10785	0.11237	-0.042349	0.39356	0.23633	0.0028233	-0.011688	-0.11169	-0.051383	0.22643	-0.2807	0.28515	0.2987	0.11801	0.34726	0.51703	0.022021	0.08978	0.35517	-0.43874	0.66798	0.2026	0.29351	0.41589	-0.3913	0.30774	0.28854	0.5223	0.73687	0.80576	0.76285	0.58103	0.69057	0.52908	0.48504	0.6262	0.74929	0.70977	0.55731	0.31338	0.15189	0.61829	0.72106
Fatty Acids	Arachidonic acid	-0.17222	0.012987	0.2524	0.25325	0.60361	-0.054771	0.37662	0.081875	0.3371	0.03612	0.022021	-0.015584	-0.21948	0.023151	0.21062	-0.22281	0.28967	0.48278	0.2987	0.10559	0.031992	-0.39356	-0.083004	0.34387	-0.17561	0.74139	-0.024675	0.081818	0.58927	-0.17787	0.11462	0.34161	0.43648	0.68379	0.67476	0.63298	0.55731	0.59345	0.46132	0.34274	0.58216	0.72332	0.60587	0.47713	0.19142	0.20045	0.52795	0.70977
Fatty Acids	Palmitic acid	-0.3179	-0.035573	0.47374	0.12468	0.67815	0.15302	0.30774	0.22981	0.51553	0.1063	-0.012987	0.046753	-0.046753	-0.028797	0.28063	-0.2807	0.35855	0.42405	0.20836	0.30999	0.50258	-0.066064	0.043478	0.25127	-0.42744	0.62733	0.15974	0.19091	0.46336	-0.39243	0.37549	0.40373	0.60587	0.66008	0.81028	0.68492	0.47939	0.63862	0.45342	0.57877	0.63749	0.81366	0.82835	0.58216	0.36985	0.11237	0.76285	0.80463
Fatty Acids	Oleic acid	-0.28741	0.11011	0.47713	0.11429	0.81028	-0.0028233	0.25692	0.11914	0.37549	0.19711	0.22981	-0.085714	-0.12727	-0.090909	0.071711	-0.22632	0.26595	0.55054	0.23998	0.25353	0.40764	-0.20949	0.10333	0.26821	-0.19819	0.738	0.15455	0.22857	0.27348	-0.45229	0.2795	0.27612	0.32468	0.48165	0.61829	0.5336	0.37098	0.48617	0.26595	0.38001	0.48617	0.70299	0.66911	0.43309	0.27612	0.063806	0.67702	0.84416
Oxylipins	12(13)-EpOME	0.30661	-0.12931	-0.29757	0.27403	-0.08978	-0.37324	0.17899	0.32016	0.05703	-0.11042	-0.063806	0.30779	0.24156	0.37098	0.031056	0.35439	-0.099944	-0.038961	0.26595	0.12705	-0.0258	-0.23772	-0.32129	-0.61265	0.11124	-0.51553	-0.16883	-0.55714	0.048504	0.22643	-0.47261	0.17335	-0.097685	-0.14512	-0.45116	-0.36759	-0.31451	-0.29983	-0.061547	-0.24562	-0.059289	-0.48278	-0.28289	-0.093168	-0.026539	-0.054771	-0.017504	-0.32355
Oxylipins	5-HETE	-0.087521	0.02428	0.13156	0.29221	0.45342	0.14963	0.57199	0.41502	0.32468	-0.03612	0.093168	-0.020779	-0.10779	0.077357	0.40034	-0.19298	0.12366	0.47939	0.33371	-0.17674	-0.095975	-0.14737	-0.019763	0.12818	0.043478	0.24675	-0.14156	0.028571	0.47575	0.05703	0.19706	0.38905	0.3834	0.29193	0.23546	0.19481	0.18464	0.33145	0.20045	0.053642	0.25918	0.30435	0.25466	0.29418	0.11914	-0.046866	0.35065	0.34274
Oxylipins	9(10)-EpOME	0.35743	-0.019763	-0.096556	0.36753	0.0073405	-0.60361	0.38792	0.3179	-0.020892	-0.16202	0.080745	0.33247	0.12338	0.3258	-0.16996	0.30702	0.022021	0.1677	0.27386	-0.23094	-0.24665	-0.15415	-0.28628	-0.44664	0.086392	-0.4489	-0.32468	-0.48052	0.062951	0.35291	-0.42405	0.042349	-0.13156	-0.16996	-0.41163	-0.24901	-0.34613	-0.19932	-0.075099	-0.36081	-0.08978	-0.35404	-0.25579	-0.035573	-0.30774	-0.14963	0.075099	-0.061547
Oxylipins	13-KODE	0.046866	-0.10672	0.17109	0.53117	0.50198	-0.29418	0.7301	0.55844	0.38905	-0.021672	0.17335	0.051948	0.0025974	0.2253	0.19819	0.040351	0.33371	0.70525	0.61604	-0.081875	-0.054696	-0.14737	-0.18803	0.046866	-0.12931	0.25466	-0.24675	-0.10909	0.32095	0.087521	-0.049125	0.25353	0.21513	0.18238	0.29418	0.26256	0.15867	0.17561	0.25805	0.027668	0.21739	0.23659	0.31677	0.2603	-0.08865	0.092038	0.55957	0.54941
Oxylipins	14-HDoHE	-0.042349	-0.32693	-0.095426	0.27273	0.046866	0.23433	0.40824	0.607	0.32693	-0.20537	-0.21739	-0.058442	0.15844	0.23659	0.34161	-0.050877	-0.1022	0.2716	0.46471	-0.07397	-0.048504	-0.33032	-0.2795	-0.44551	0.24337	-0.11688	-0.15065	-0.27013	0.26935	0.15415	0.17899	0.64314	0.34387	-0.046866	-0.18238	-0.28741	-0.14737	-0.17674	-0.060418	0.16657	0.19029	-0.07284	0.081875	0.16431	0.37098	-0.067194	0.17335	-0.10446
Oxylipins	17-HDoHE	0.052513	-0.21626	-0.17448	0.17792	-0.05703	0.12366	0.36081	0.58893	0.1598	-0.23839	-0.17674	-0.26753	-0.0038961	0.22191	0.33936	0.18772	-0.090909	0.27612	0.45793	-0.12705	-0.22394	-0.32693	-0.2908	-0.31225	0.27612	-0.10672	-0.17143	-0.26364	0.28173	0.2524	0.059289	0.63749	0.30774	-0.0039526	-0.12818	-0.24224	-0.054771	-0.098814	0.0050819	0.16093	0.18125	-0.095426	0.035573	0.13721	0.28628	-0.068323	0.20723	-0.11688
Oxylipins	14,15-DiHETE	0.47614	-0.11861	-0.50777	-0.11952	-0.16097	-0.44846	0.16775	0.41514	-0.31686	-0.2065	-0.26264	-0.036375	0.037025	0.27224	-0.13612	0.57368	-0.064953	0.041231	0.10223	-0.30613	-0.44295	-0.31234	-0.21915	-0.305	0.018074	-0.40554	-0.33777	-0.45325	-0.075335	0.61113	-0.39593	0.17001	0.061	-0.18978	-0.17735	-0.31178	-0.26546	-0.05987	-0.122	-0.011296	-0.12878	-0.17396	-0.13894	-0.071166	-0.25925	-0.41344	0.20446	-0.13951
Oxylipins	TXB2	-0.053642	-0.25692	-0.19593	0.087013	-0.20271	-0.028797	0.20158	0.27273	-0.010728	0.17647	-0.17899	-0.11558	0.16104	-0.047995	0.015246	-0.033333	-0.32355	-0.0039526	0.18351	-0.12253	-0.16821	-0.046866	-0.085263	-0.51666	0.13156	-0.37549	-0.094805	-0.18182	0.16202	0.26369	0.092038	0.4681	0.093168	-0.25579	-0.44325	-0.50198	-0.32806	-0.33484	-0.23094	-0.11124	-0.11011	-0.37324	-0.27499	-0.14737	-0.034444	-0.16996	-0.010728	-0.26595
Oxylipins	19,20-DiHDPA	0.39763	-0.20616	-0.36939	0.18318	-0.023157	-0.39367	0.38181	0.56142	-0.069472	-0.14868	-0.23948	0.29815	0.34492	0.44055	-0.009037	0.25538	0.016944	0.0016944	0.15589	-0.15871	-0.25194	-0.26207	-0.21406	-0.62638	0.067777	-0.52415	-0.20461	-0.54433	-0.055756	0.52528	-0.33606	0.25925	0.057611	-0.21011	-0.39706	-0.50381	-0.54109	-0.29144	-0.31065	-0.095453	-0.11466	-0.31968	-0.21689	-0.0084722	-0.012991	-0.21858	0.046879	-0.18187
Oxylipins	11,12-DiHETrE	0.14737	-0.054771	-0.16883	0.23896	0.12705	-0.44325	0.50875	0.3371	-0.078487	0.10836	-0.19706	0.098701	0.24545	0.2795	-0.031056	0.14211	-0.12818	0.29757	0.36533	-0.18916	-0.19298	-0.36307	-0.034444	-0.17899	0.11124	-0.060418	-0.1961	-0.30779	0.14138	0.4952	-0.17448	0.41728	0.15189	0.15528	-0.04009	-0.035573	-0.011858	0.15867	0.13947	-0.25014	0.092038	-0.068323	-0.096556	0.21287	-0.13721	-0.16544	0.17109	0.070582
Oxylipins	14,15-DiHETrE	0.22868	-0.066064	-0.14963	0.3974	0.3563	-0.52117	0.5144	0.33258	-0.042349	0.14138	-0.1406	0.16234	0.15714	0.35517	-0.060418	0.20526	0.18916	0.48165	0.48165	-0.1135	-0.14138	-0.45455	0.032185	0.017504	-0.18012	0.12705	-0.15714	-0.4026	0.24045	0.35517	-0.41502	0.26482	0.071711	0.20497	0.20836	0.17335	0.16544	0.31451	0.29418	-0.14963	0.13269	0.15867	0.12479	0.23546	-0.21513	-0.24562	0.39018	0.35968
Oxylipins	LTE4	-0.13043	0.17335	0.1135	-0.033766	0.30548	0.32242	0.12818	0.094297	0.20384	0.34572	0.19706	-0.30519	-0.22468	-0.031056	0.43648	-0.35263	-0.034444	0.10898	-0.029927	0.022021	0.12074	-0.0095991	0.345	0.060418	0.17222	0.33145	0.38571	0.30519	0.45304	-0.13382	0.38114	0.43196	0.32242	0.32919	0.1135	0.076228	0.1135	0.25466	0.022021	0.14737	0.26595	0.24788	0.12027	0.24337	0.35065	-0.045737	-0.001694	0.13608
Oxylipins	8,9-DiHETrE	-0.048009	-0.17227	-0.17057	-0.033128	0.066083	-0.18074	0.305	0.2118	0.2536	0.094992	-0.38916	0.12926	0.037025	-0.012426	0.13781	0.060553	-0.09037	0.053092	-0.012426	-0.21745	-0.44192	0.020898	-0.080768	0.0056481	-0.25981	0.0062129	-0.10068	0.019487	0.21064	0.4157	0.1333	0.25021	0.41344	0.21406	0.27958	0.16097	0.063259	0.23044	0.13951	0.090935	0.051963	0.1734	0.1107	0.090935	-0.18582	-0.009037	0.25981	0.088111
Oxylipins	17,18-DiHETE	0.50423	-0.15641	-0.47261	0.054545	-0.031056	-0.47374	0.2524	0.42405	-0.17335	-0.27348	-0.23885	0.085714	-0.058442	0.30322	-0.07284	0.53333	0.14737	0.11688	0.18012	-0.24337	-0.53354	-0.28515	-0.2716	-0.17335	-0.080745	-0.31903	-0.39351	-0.43896	0.067079	0.53247	-0.50875	0.010728	0.12479	-0.058159	-0.019763	-0.17335	-0.1869	0.028797	-0.029927	-0.0062112	-0.10333	-0.055901	-0.059289	-0.036702	-0.29757	-0.30999	0.21287	-0.027668
Oxylipins	TXB3	0.059289	-0.25918	-0.30774	0.3039	-0.22756	-0.078487	0.21626	0.23546	-0.1022	-0.16202	-0.48278	0.22078	0.4039	0.34387	-0.14737	-0.017544	-0.18238	-0.10898	0.11801	-0.3642	-0.33127	-0.2253	-0.31112	-0.47036	0.027668	-0.43874	-0.32597	-0.42727	-0.23633	0.52682	-0.21287	0.25127	-0.016375	-0.32016	-0.46132	-0.57312	-0.49746	-0.44438	-0.41954	-0.13495	-0.2524	-0.38679	-0.3563	-0.16431	0.052513	-0.1869	-0.064935	-0.29531
Oxylipins	19-HETE	0.12027	-0.32806	-0.14963	0.21039	0.43761	-0.25579	0.41954	0.345	0.12931	0.18266	-0.16996	0.24416	0.25195	0.12479	0.055901	0.05614	0.37775	0.37888	0.3371	0.17787	0.052632	-0.29644	0.21513	0.2253	-0.46584	0.30096	0.10779	-0.26623	0.42828	0.11801	-0.19029	0.20836	0.16544	0.28402	0.54941	0.38453	0.38679	0.44212	0.45342	0.10559	0.22868	0.42405	0.42631	0.28289	-0.10446	-0.028797	0.41502	0.4568
Clinical	FEV1	0.58554	-0.076228	-0.48052	0.081818	-0.28515	-0.38227	0.11462	0.17109	-0.24111	-0.087719	-0.068323	0.42727	0.44026	0.51892	-0.1485	0.28246	-0.055901	-0.28176	-0.21513	-0.40373	-0.34159	-0.0073405	-0.064935	-0.4026	0.068323	-0.50311	-0.15455	-0.24545	-0.36223	0.6454	-0.25692	-0.32919	-0.18916	-0.41615	-0.41841	-0.38001	-0.51892	-0.41389	-0.35855	-0.22756	-0.35404	-0.35517	-0.36194	-0.15528	-0.28628	-0.2061	-0.36194	-0.36194
Clinical	IgE	-0.65763	0.16384	0.37006	-0.39623	0.0079096	0.32825	-0.29605	-0.35367	0.29379	-0.05676	0.053107	-0.19168	-0.39246	-0.66723	0.24463	-0.28885	-0.15706	-0.075141	-0.24802	0.26949	0.045431	0.37006	0.0084746	0.32203	-0.011864	0.2565	0.19168	0.44834	-0.013416	-0.39944	0.37175	0.014689	0.030508	0.22486	0.13672	0.21977	0.27175	0.21695	0.15085	-0.0039548	0.14068	0.046328	0.051412	-0.016384	0.22542	0.51469	-0.028249	0.0028249
Clinical	FER	0.24111	-0.2253	-0.39469	0.17013	-0.086392	0.018634	0.13834	0.20949	-0.036702	-0.11249	-0.30548	0.55584	0.82468	0.52569	-0.010728	0.094737	-0.16883	-0.33597	-0.13721	-0.0039526	0.14345	-0.13947	-0.076228	-0.36759	-0.0050819	-0.32806	0.023377	-0.27662	-0.30031	0.40599	-0.045737	-0.020892	0.015246	-0.17335	-0.17222	-0.25579	-0.30887	-0.29305	-0.20949	-0.064935	-0.15302	-0.21626	-0.14399	0.031056	0.18012	-0.010728	-0.21174	-0.33258
Clinical	Reversibility	-0.22085	0.21955	0.3761	-0.24445	-0.057161	0.13056	-0.20851	-0.24099	-0.01429	0.071078	0.41377	-0.36931	-0.54005	-0.50276	-0.0058461	0.058798	0.043521	0.031829	-0.075999	0.096135	0.052728	0.42286	0.11562	0.2897	0.0032478	-0.015589	0.11729	0.20786	0.13725	-0.42806	0.071452	-0.0084443	-0.26632	0.011043	-0.11627	0.064307	0.11627	0.11172	0.087691	-0.2241	-0.036375	-0.17798	-0.16694	-0.17603	-0.10133	0.11952	-0.026632	-0.0058461
Clinical	Neutrophil (BAL)	0.072419	-0.054314	0.096747	-0.30589	-0.0067893	0.09505	-0.19349	0.012447	-0.084866	0.6087	0.45714	-0.58705	-0.37228	-0.19519	0.26082	-0.14782	0.18048	0.24951	0.18388	0.30552	0.43492	0.26139	0.72645	0.20085	-0.078077	0.30608	0.63329	0.26944	0.60879	-0.24781	0.23083	0.26422	0.074682	0.22518	0.15332	0.2529	0.41415	0.46902	0.45941	0.026591	0.37567	0.1901	0.17086	0.36436	0.091089	-0.24724	-0.081471	0.15446
Clinical	Th17 (PBMC)	0.1525	0.20446	-0.05874	-0.090289	-0.11296	-0.12087	0.15645	-0.037278	-0.12482	-0.38513	0.12878	-0.056512	-0.2254	0.061565	-0.10506	0.22203	-0.18074	-0.053092	-0.20333	-0.27676	-0.45844	0.097713	-0.44225	-0.045185	0.35583	-0.18865	-0.55195	0.21241	-0.40764	0.28523	-0.061565	-0.26942	-0.32081	-0.15871	-0.3852	-0.26546	-0.39367	-0.27845	-0.43716	-0.37447	-0.38633	-0.41627	-0.50325	-0.3355	-0.30669	0.19768	-0.21971	-0.2022
Clinical	Th2 (PBMC)	-0.12161	0.0062217	-0.32975	-0.15615	-0.14253	-0.078054	0.12217	0.077489	0.019231	-0.49096	-0.15894	0.065648	-0.041599	-0.28846	0.0181	0.20993	-0.53281	-0.089932	-0.10124	-0.21719	-0.60258	-0.088801	-0.45023	-0.17817	0.41968	-0.36143	-0.47774	-0.070918	-0.27804	0.35634	-0.033371	-0.076923	-0.098982	-0.29581	-0.42421	-0.43213	-0.30091	-0.31674	-0.29412	-0.40554	-0.38235	-0.48303	-0.46041	-0.40498	-0.22964	0.20871	-0.181	-0.46097
Clinical	MAIT (PBMC)	0.45342	-0.053642	-0.42405	-0.037662	-0.53473	-0.30661	-0.18464	-0.0050819	-0.52569	-0.34572	-0.17899	0.25844	0.38052	0.39469	-0.4026	0.3807	-0.18238	-0.29305	-0.23433	-0.60813	-0.32508	-0.085263	-0.22868	-0.3913	0.029927	-0.52908	-0.36494	-0.36494	-0.55005	0.64879	-0.2332	-0.3258	-0.20836	-0.60361	-0.48165	-0.43986	-0.47713	-0.45455	-0.38453	-0.044608	-0.28741	-0.29757	-0.26369	-0.15076	-0.22643	-0.43535	-0.18125	-0.32355
Clinical	IL13 (Serum)	-0.24922	0.47239	0.30983	-0.21571	-0.21014	-0.42198	-0.41178	-0.35061	-0.10705	0.16632	-0.018125	-0.348	-0.39687	-0.16596	-0.24526	0.025562	-0.25998	0.047012	-0.057774	-0.27698	-0.089969	0.22317	0.0039649	-0.12065	0.10195	-0.043048	-0.0032573	0.16813	-0.40976	0.039649	-0.017559	-0.12971	0.070802	-0.089493	-0.16766	-0.050411	-0.17955	-0.024356	-0.12744	-0.0056641	-0.0028321	-0.079864	-0.11158	0.024922	-0.070802	-0.27528	0.10762	0.056075
Transcriptomics	---	-0.38679	0.48391	0.63862	0.045455	0.39243	0.26934	-0.050254	-0.31112	0.32355	0.14757	0.51214	-0.31039	-0.58182	-0.3563	0.19368	-0.31754	0.15867	0.13382	-0.054771	0.1214	0.11662	0.19819	0.1677	0.51101	0.19368	0.50988	0.2961	0.42857	0.22601	-0.66685	0.24111	0.022021	0.038961	0.42857	0.26482	0.39921	0.33597	0.2795	0.15189	0.019763	0.22868	0.28741	0.15302	0.086392	0.24224	0.37775	0.022021	0.30774
Transcriptomics	SPTBN4	-0.39932	0.55182	0.51454	-0.23709	0.0084722	0.24795	-0.38068	-0.57328	0.046315	0.27052	0.49308	-0.45209	-0.53524	-0.43604	0.027676	-0.25362	-0.13443	-0.13725	-0.33776	-0.064389	0.070212	0.51172	0.24456	0.49816	0.20559	0.32646	0.31299	0.56512	-0.011352	-0.42474	0.34792	-0.14403	-0.041231	0.23835	0.046315	0.23496	0.19486	0.17283	0.0056481	-0.12087	0.05987	0.051963	-0.12934	-0.0062129	0.15476	0.24117	-0.20559	0.045185
Transcriptomics	MTCH1	0.51101	-0.32016	-0.54376	0.020779	-0.37775	-0.2908	-0.044608	0.033315	-0.4568	0.25284	-0.26595	0.29351	0.57792	0.4218	-0.3834	0.34386	-0.13947	-0.26369	-0.067194	-0.22417	-0.034056	-0.1135	0.18464	-0.29757	-0.21287	-0.44325	-0.01039	-0.4026	-0.083591	0.57086	-0.29644	-0.063806	-0.25579	-0.36533	-0.29644	-0.27724	-0.22981	-0.19368	-0.078487	-0.24788	-0.28854	-0.30887	-0.30661	-0.12479	-0.37324	-0.50875	-0.23094	-0.33597
Transcriptomics	REM1	-0.48504	0.43309	0.50085	-0.27273	0.17561	0.31903	-0.16996	-0.34274	0.15867	0.22601	0.28515	-0.57273	-0.64156	-0.47713	0.30999	-0.49825	-0.022021	0.054771	-0.17674	0.18125	0.1806	0.33258	0.16544	0.476	0.23546	0.55731	0.21429	0.72338	0.1806	-0.43874	0.49068	0.071711	0.35404	0.57086	0.36081	0.36985	0.32806	0.41502	0.12366	0.18125	0.32129	0.3563	0.15867	0.24337	0.32016	0.35743	-0.02428	0.26369
Transcriptomics	KLRC4-KLRK1 /// KLRK1	0.54037	-0.22981	-0.50085	0.2	-0.21174	-0.34613	0.13156	0.40599	-0.19819	-0.062951	-0.17787	0.43506	0.69221	0.62394	-0.23659	0.37368	-0.13382	-0.26934	-0.031056	-0.34049	-0.11868	-0.23998	-0.13269	-0.73461	0.050254	-0.64766	-0.055844	-0.61039	-0.31476	0.5799	-0.29305	0.083004	-0.083004	-0.52682	-0.55167	-0.62055	-0.65443	-0.58442	-0.45229	-0.054771	-0.24224	-0.40034	-0.26482	-0.10672	0.015246	-0.38905	-0.11011	-0.36759
Transcriptomics	---	-0.3834	0.4873	0.35517	-0.11688	0.0039526	0.26595	-0.16093	-0.23659	0.10559	-0.054696	0.30096	-0.44416	-0.3961	-0.31338	0.36307	-0.37368	-0.12592	0.086392	-0.0095991	0.029927	0.069143	0.1869	0.060418	0.38792	0.54602	0.4105	0.14286	0.55584	-0.087719	-0.30209	0.38905	-0.1485	0.32016	0.29418	0.2253	0.25014	0.28854	0.16431	0.12366	0.11801	0.23207	0.22304	0.11914	0.22868	0.35855	0.37098	-0.20158	0.033315
Transcriptomics	ARPC2	0.37775	-0.035573	-0.2524	0.10909	-0.053642	-0.18803	0.097685	0.20836	-0.13156	0.25697	-0.11914	0.37922	0.63247	0.52908	-0.15754	0.35789	-0.14399	-0.23659	-0.10672	-0.084133	0.2322	-0.028797	0.14737	-0.47261	-0.16996	-0.46132	0.13117	-0.32987	-0.18885	0.31112	-0.1485	0.10785	-0.13495	-0.27499	-0.26143	-0.24337	-0.36081	-0.23659	-0.18577	-0.097685	-0.21739	-0.28063	-0.16996	-0.077357	-0.11914	-0.42857	0.04122	-0.20497
Transcriptomics	EPHA10	-0.19029	0.40147	0.39469	-0.3013	-0.034444	0.26256	-0.40824	-0.39243	0.011858	0.021672	0.32355	-0.45065	-0.66364	-0.25692	0.21852	-0.18596	0.17448	-0.15189	-0.31225	0.15867	0.12281	0.17561	0.11237	0.23546	0.054771	0.35291	0.30649	0.36753	0.12281	-0.49746	0.17787	0.054771	-0.0095991	0.32355	0.12818	0.2524	0.23207	0.19932	0.051383	0.32806	0.3179	0.24337	0.16883	0.085263	0.31564	0.24449	-0.04122	0.16093
Transcriptomics	TRIT1	0.19029	-0.092038	-0.38453	0.14286	-0.38453	-0.27047	-0.18012	-0.26934	-0.31112	0.1806	-0.097685	0.23506	0.33896	0.13043	-0.51327	0.21404	-0.39695	-0.38905	-0.18916	-0.40599	-0.37461	-0.049125	0.046866	-0.38001	0.093168	-0.55167	-0.01039	-0.38701	-0.35397	0.38679	-0.36194	-0.17448	-0.61604	-0.66798	-0.79898	-0.66347	-0.53811	-0.66798	-0.49181	-0.60023	-0.61604	-0.72219	-0.74704	-0.57199	-0.36759	-0.2524	-0.52005	-0.58893
Transcriptomics	MME	-0.28289	0.50085	0.39921	-0.34286	-0.049125	0.2987	-0.36533	-0.49746	0.037832	0.081527	0.49633	-0.30519	-0.50779	-0.52569	0.19706	-0.26316	-0.07284	-0.38679	-0.48617	0.23998	0.069143	0.43196	0.16206	0.38453	0.34952	0.20836	0.34286	0.52208	0.075335	-0.55167	0.34387	-0.19368	0.064935	0.35855	0.10785	0.24111	0.22191	0.13834	0.050254	0.033315	0.15415	0.08978	-0.032185	-0.0073405	0.23094	0.53811	-0.36081	-0.10107
Transcriptomics	VEGFB	0.02428	-0.45229	-0.12366	0.18831	0.22417	0.10898	0.2061	0.45455	0.36533	-0.16409	-0.40373	0.25714	0.32597	0.41841	0.29418	0.045614	0.22304	0.3371	0.42405	0.21174	0.3354	-0.34049	-0.12592	-0.16544	-0.4026	0.19481	0.011688	-0.26364	0.28586	0.1022	0.014116	0.38001	0.40599	0.22868	0.39018	0.2716	0.25918	0.31564	0.39243	0.40599	0.43874	0.38227	0.54037	0.476	0.35517	-0.16996	0.47149	0.2716
Transcriptomics	MSI2	0.18803	-0.095426	-0.19593	0.10519	0.13043	-0.47487	0.22078	0.17899	-0.033315	-0.011352	-0.23998	0.32987	0.44935	0.4568	-0.36194	0.29649	-0.26821	0.10333	0.052513	-0.30548	-0.060888	-0.26595	-0.26821	-0.40824	-0.075099	-0.14963	-0.29351	-0.28052	-0.31682	0.54489	-0.12253	0.13947	-0.026539	-0.14512	-0.22981	-0.20271	-0.38227	-0.13947	-0.25127	-0.17448	-0.099944	-0.16206	-0.15415	0.059289	-0.11462	-0.30887	0.24675	0.063806
Transcriptomics	DAGLA	-0.39356	0.12818	0.34161	-0.28312	0.071711	0.37775	-0.17899	-0.10107	0.1598	-0.14964	0.30322	-0.59481	-0.64675	-0.56522	0.30435	-0.43684	0.07284	0.13721	0.00056465	0.28063	0.12693	0.29193	-0.11011	0.36081	0.23094	0.41502	-0.0051948	0.57792	0.22601	-0.48052	0.43196	-0.0095991	0.38792	0.35291	0.3179	0.214	0.28402	0.23207	0.10446	0.33597	0.31564	0.31903	0.26934	0.17109	0.32919	0.39018	0.077357	0.22304
Transcriptomics	CNOT6L	0.043478	-0.2061	-0.30435	0.27143	0.099944	-0.31451	0.27724	0.31677	0.20271	-0.1806	-0.41502	0.47013	0.40779	0.24788	-0.054771	0.26491	-0.15076	0.11462	0.11462	-0.18012	-0.23013	-0.1869	-0.32468	-0.57199	-0.30999	-0.38227	-0.34805	-0.33117	-0.28793	0.38001	-0.22756	-0.034444	-0.062676	-0.46697	-0.22868	-0.33032	-0.42857	-0.39243	-0.27837	-0.0073405	-0.3258	-0.22643	-0.037832	-0.28741	-0.30435	-0.24337	0.35968	-0.0062112
Transcriptomics	UCN2	-0.43648	0.31225	0.5607	-0.074026	0.20497	0.36081	0.032185	-0.029927	0.28289	0.011352	0.36081	-0.41299	-0.42468	-0.38792	0.24675	-0.2614	0.054771	0.1135	0.025409	0.16318	0.19711	0.36307	-0.022021	0.3371	0.22304	0.23772	0.13377	0.37792	0.12074	-0.50875	0.34952	0.17899	0.18351	0.31112	0.16544	0.16883	0.15867	0.14625	0.036702	0.070582	0.16883	0.092038	0.078487	0.076228	0.33258	0.38792	0.12366	0.16544
Transcriptomics	NR0B2	-0.35178	0.30661	0.65669	-0.16104	0.17448	0.16996	-0.13947	-0.28628	0.26369	0.12074	0.36194	-0.3026	-0.70909	-0.39921	0.27273	-0.47018	0.30548	0.054771	-0.18803	0.17674	0.14138	0.39695	0.097685	0.29193	-0.11914	0.43083	0.20779	0.48961	0.4097	-0.5336	0.36872	0.12027	0.31677	0.59232	0.32468	0.47036	0.30548	0.46471	0.23659	0.31677	0.52569	0.45229	0.34613	0.34387	0.26934	0.31451	0.15076	0.45003
Transcriptomics	CYB5RL	-0.19029	0.094297	0.65104	-0.031169	0.32806	0.058159	-0.14399	-0.18916	0.16657	0.12074	0.3642	-0.34935	-0.63247	-0.27612	-0.090909	-0.40175	0.4952	0.39582	0.18238	0.15302	0.26729	0.13721	0.13156	0.50875	-0.1214	0.64992	0.12597	0.36364	0.37461	-0.59684	0.21513	-0.060418	0.26934	0.49633	0.5336	0.57877	0.42518	0.53021	0.33823	0.34161	0.50762	0.66798	0.5336	0.44438	0.18351	0.04122	0.27386	0.6725
Transcriptomics	DBI	0.1677	-0.17899	-0.30435	-0.14026	-0.13043	-0.043478	-0.1406	0.13721	-0.090909	0.10423	-0.22304	0.32597	0.59091	0.27837	-0.094297	0.20702	-0.26369	-0.26934	-0.17561	0.13156	0.35191	0.07284	0.097685	-0.57651	-0.19932	-0.46245	0.12338	-0.18831	-0.22807	0.22191	-0.0050819	0.0073405	-0.077357	-0.3642	-0.31677	-0.35855	-0.41389	-0.27273	-0.24788	-0.019763	-0.2061	-0.30661	-0.13947	-0.08978	-0.0039526	-0.38679	-0.0039526	-0.27273
Transcriptomics	DGKQ	0.55167	-0.25918	-0.55392	0.12857	-0.45567	-0.30887	0.087521	0.30209	-0.42067	-0.001032	-0.27273	0.24156	0.54545	0.48955	-0.1869	0.47544	-0.12479	-0.24111	0.069452	-0.18803	-0.11455	-0.18464	-0.058159	-0.59006	-0.058159	-0.68154	-0.16364	-0.57922	-0.11249	0.56522	-0.37775	0.085263	-0.1485	-0.44551	-0.43083	-0.45906	-0.37211	-0.38453	-0.15867	-0.096556	-0.24562	-0.43196	-0.27837	-0.15754	-0.26482	-0.45229	-0.098814	-0.41163
Transcriptomics	PPM1K	0.52343	-0.24562	-0.38905	0.17792	-0.20497	-0.29644	0.011858	0.18803	-0.35855	0.17647	-0.16657	0.21429	0.31948	0.33032	-0.40599	0.38596	0.085263	-0.093168	0.17787	-0.04122	-0.034056	-0.21174	0.14399	-0.40147	-0.10107	-0.59006	-0.050649	-0.56104	-0.12074	0.18577	-0.59119	-0.14625	-0.45342	-0.55505	-0.41954	-0.47261	-0.40147	-0.41163	-0.23659	-0.26143	-0.49068	-0.43422	-0.33484	-0.4026	-0.46358	-0.5607	-0.14963	-0.30887
Transcriptomics	PICALM	0.52456	-0.40034	-0.58329	0.19351	0.12818	-0.20271	0.30548	0.55957	-0.095426	-0.12074	-0.29644	0.25455	0.41818	0.55054	-0.032185	0.42281	0.1214	0.11011	0.27047	0.1022	0.0072239	-0.4873	-0.16657	-0.49068	-0.17448	-0.3179	-0.20909	-0.53247	0.04644	0.35404	-0.45906	0.14963	-0.10107	-0.27273	-0.14512	-0.35968	-0.31225	-0.23546	-0.18351	0.059289	-0.19706	-0.16544	-0.023151	-0.13608	-0.12931	-0.38001	0.22078	-0.062676
Transcriptomics	FBXL6	-0.13156	0.26595	0.19368	-0.45714	-0.20836	0.13269	-0.34613	-0.2716	-0.11575	-0.01548	0.30887	-0.34935	-0.41948	-0.46132	0.05703	-0.017544	-0.049125	-0.26708	-0.33371	0.071711	-0.11662	0.24111	0.21852	0.29305	0.3258	0.059289	0.35974	0.23766	0.001032	-0.25918	0.16431	-0.010728	-0.14173	0.10333	-0.076228	0.033315	0.12818	0.078487	0.02428	-0.080745	0.067194	-0.075099	-0.1406	-0.049125	0.15641	0.345	-0.36872	-0.22191
Transcriptomics	LOC100129129	-0.47939	0.1214	0.60813	-0.1026	0.27047	0.42067	-0.046866	-0.12366	0.2987	-0.16409	0.31112	-0.27273	-0.60779	-0.55505	0.32355	-0.53158	0.33371	0.20949	-0.0084698	0.36646	0.26316	0.30322	-0.052513	0.32242	-0.08978	0.42518	0.0025974	0.44675	0.33333	-0.70299	0.39018	0.019763	0.2716	0.40937	0.37098	0.37324	0.32919	0.34274	0.20271	0.37211	0.41276	0.45003	0.45116	0.214	0.28289	0.39356	0.25692	0.47374
Transcriptomics	TARP /// TRGC2	0.50988	-0.34161	-0.52343	-0.045455	-0.19706	-0.2987	0.12027	0.47374	-0.14737	-0.15996	-0.28289	0.27532	0.53506	0.56522	-0.087521	0.46316	-0.15302	-0.08978	0.1135	-0.05703	0.0258	-0.34839	-0.15867	-0.62281	0.080745	-0.43874	-0.075325	-0.47532	-0.14757	0.55618	-0.21626	0.22868	-0.0050819	-0.26595	-0.33936	-0.38792	-0.38227	-0.25353	-0.16318	-0.026539	-0.047995	-0.29757	-0.14512	0.076228	0.044608	-0.32129	-0.038961	-0.32468
Transcriptomics	OLAH	-0.45229	0.14173	0.46019	-0.071429	0.17335	0.14286	-0.035573	-0.083004	0.21626	-0.28173	0.053642	-0.31169	-0.41039	-0.18464	0.18916	-0.38596	0.10446	0.49294	0.25466	-0.012987	0.060888	-0.062676	-0.17899	0.31677	0.17674	0.61265	-0.16494	0.35974	-0.12693	-0.19706	0.31112	0.029927	0.22643	0.29644	0.28176	0.34049	0.30548	0.3258	0.19255	0.20271	0.42292	0.39469	0.34613	0.42405	0.38566	0.2524	0.1869	0.41954
Transcriptomics	LZTS2	-0.47487	0.060418	0.56522	0.092208	0.30435	0.56296	0.027668	0.0062112	0.37098	-0.1806	0.085263	-0.23117	-0.41299	-0.24111	0.50988	-0.6614	0.39243	0.40034	0.26369	0.38001	0.4386	0.070582	0.028797	0.28063	-0.031056	0.55618	0.048052	0.42338	0.33127	-0.63749	0.37888	0.081875	0.3913	0.44325	0.4681	0.42631	0.40711	0.4105	0.30209	0.46132	0.49972	0.56748	0.57425	0.41728	0.47149	0.22643	0.22417	0.48391
Transcriptomics	AP1G2	0.14963	-0.20158	-0.3258	0.0064935	0.0073405	-0.12592	0.21852	0.29305	0.1214	-0.050568	-0.42518	0.35325	0.33117	0.2603	0.092038	0.29123	-0.10333	-0.18238	-0.13382	0.13156	-0.075335	-0.094297	-0.25579	-0.57425	-0.34726	-0.39921	-0.21688	-0.22208	-0.091847	0.26821	-0.12592	0.17335	-0.011858	-0.17335	-0.11688	-0.23772	-0.35291	-0.25127	-0.23546	0.1485	-0.214	-0.21062	-0.036702	-0.25918	-0.20158	-0.092038	0.2908	-0.094297
Transcriptomics	ITGA4	0.34952	0.070582	-0.33032	0.23377	-0.044608	-0.29531	0.18351	0.12705	-0.17899	0.24458	-0.23433	0.21688	0.46104	0.58216	-0.12479	0.45789	-0.23094	-0.098814	0.079616	-0.10333	0.050568	-0.33145	0.058159	-0.42518	-0.060418	-0.33484	-0.023377	-0.41429	-0.19505	0.37211	-0.36872	0.23885	-0.26256	-0.19255	-0.26708	-0.20949	-0.21739	-0.2061	-0.10107	-0.21287	-0.25466	-0.35178	-0.2795	-0.18916	-0.24562	-0.39921	0.069452	-0.21626
Transcriptomics	TBRG1	0.50311	-0.22304	-0.76736	-0.0012987	-0.36533	-0.27499	-0.069452	0.077357	-0.36307	0.17853	-0.2524	0.29091	0.62078	0.39356	-0.2987	0.56842	-0.30774	-0.54828	-0.28741	-0.21287	-0.29825	-0.11011	-0.045737	-0.41276	-0.13043	-0.62281	0.025974	-0.48182	-0.2838	0.60813	-0.40937	-0.038961	-0.32129	-0.4952	-0.43761	-0.54037	-0.43196	-0.5336	-0.36646	-0.22417	-0.50762	-0.5528	-0.49407	-0.46132	-0.27837	-0.23885	-0.22643	-0.56635
Transcriptomics	MAPK8	0.047995	-0.3642	-0.3563	0.3013	0.18238	-0.19029	0.20836	0.24562	0.30209	-0.11455	-0.45116	0.43896	0.47273	0.41502	-0.10333	0.34035	-0.16996	0.055901	0.18125	-0.067194	-0.12487	-0.38679	-0.38905	-0.37436	-0.31677	-0.12253	-0.20779	-0.46364	-0.11042	0.35743	-0.25805	0.26482	-0.0050819	-0.12027	-0.090909	-0.16544	-0.17899	-0.19029	-0.08978	-0.034444	-0.08978	-0.14625	-0.034444	-0.095426	0.025409	-0.10446	0.32693	-0.037832
Transcriptomics	RP11-6F2.5	-0.019763	0.35743	0.21062	-0.17662	-0.3913	-0.085263	-0.33258	-0.43535	-0.18351	-0.17853	0.34274	-0.37403	-0.62338	-0.24449	-0.028797	-0.066667	-0.04122	-0.038961	-0.080745	-0.19932	-0.27967	0.2987	-0.076228	0.37211	0.42405	0.097685	-0.14545	0.36234	-0.11868	-0.052513	-0.001694	-0.43309	-0.092038	0.10446	-0.10446	0.15076	0.15754	0.08978	0.1135	-0.24788	0.02428	-0.10333	-0.2524	0.020892	-0.12027	0.21626	-0.45455	-0.18125
Transcriptomics	---	-0.31677	0.04009	0.27612	-0.24156	0.29757	0.051383	-0.25692	-0.18464	0.20158	0.10836	0.33145	-0.4013	-0.64675	-0.51779	0.18351	-0.42982	0.20723	0.33484	0.02428	0.18351	0.17028	0.25805	0.10672	0.3642	-0.19368	0.59797	0.14156	0.53506	0.49639	-0.37211	0.3258	-0.11124	0.47939	0.39808	0.46697	0.40373	0.3834	0.50649	0.2908	0.37775	0.4873	0.61152	0.49972	0.3834	0.19142	0.045737	0.30096	0.56635
Transcriptomics	RNF123	0.077357	-0.2603	-0.4105	-0.1026	0.07397	-0.037832	0.029927	0.38679	0.020892	0.021672	-0.3563	0.05974	0.47403	0.29531	0.060418	0.28421	-0.2603	0.042349	0.10559	0.046866	0.27967	-0.27612	-0.019763	-0.45116	-0.20158	-0.14512	0.092208	-0.28312	-0.091847	0.33484	0.015246	0.42292	0.20384	-0.17899	-0.04009	-0.24901	-0.16544	-0.078487	-0.087521	0.23546	0.04009	-0.034444	0.12592	0.085263	0.20949	-0.39921	0.38227	-0.037832
Transcriptomics	MIER1	0.059289	-0.081875	-0.18916	0.3013	-0.010728	-0.19932	0.19255	0.10559	0.1135	0.15583	-0.14737	0.37273	0.46753	0.27724	-0.098814	0.024561	-0.24901	-0.11124	-0.08978	-0.32919	-0.1063	0.13269	-0.12705	-0.51101	-0.22868	-0.3563	-0.16753	-0.1	-0.18473	0.37324	0.050254	-0.038961	0.083004	-0.35855	-0.28854	-0.31564	-0.46132	-0.4105	-0.34726	-0.037832	-0.26256	-0.21287	-0.15076	-0.17448	-0.20836	-0.27386	0.13043	-0.054771
Transcriptomics	DAG1	0.27386	-0.36759	-0.41276	0.12468	0.29531	-0.20384	0.3371	0.31903	0.061547	0.15789	-0.29531	0.35325	0.54675	0.44438	-0.1406	0.24737	0.0039526	0.1598	0.11124	-0.029927	-0.011352	-0.36985	0.066064	-0.18125	-0.27837	0.028797	-0.0090909	-0.24675	-0.1517	0.4105	-0.17899	0.12479	-0.23094	-0.18464	-0.00056465	-0.11575	-0.16996	-0.084133	-0.12818	-0.14737	-0.2332	-0.063806	-0.051383	-0.085263	-0.18012	-0.20271	0.13721	0.069452
Transcriptomics	DESI2	0.16318	-0.23094	-0.37662	0.12987	0.1869	-0.10446	0.13608	0.41389	0.033315	-0.011352	-0.35065	0.31818	0.57662	0.48617	-0.045737	0.15088	-0.079616	-0.016375	-0.020892	-0.20723	0.071207	-0.29305	-0.087521	-0.61829	-0.27612	-0.25466	0	-0.3987	-0.20743	0.41615	-0.096556	0.26708	0.11124	-0.3642	-0.23659	-0.47261	-0.52569	-0.33597	-0.45003	0.24901	-0.096556	-0.047995	0.063806	0.00056465	0.23659	-0.45229	0.33484	0.049125
Transcriptomics	CNTN4	-0.43196	0.22304	0.37662	-0.47013	-0.026539	0.20949	-0.38679	-0.43196	-0.0084698	-0.01548	0.070582	-0.44156	-0.48831	-0.34387	0.15528	-0.54561	-0.012987	0.077357	-0.19255	0.10672	0.093911	0.097685	0.14625	0.38114	0.21287	0.66573	0.21299	0.6026	-0.12281	-0.21287	0.46471	-0.012987	0.20949	0.43986	0.26369	0.34274	0.31903	0.41276	0.13269	0.21739	0.4489	0.40711	0.21739	0.43196	0.4489	0.30887	-0.18916	0.23772
Transcriptomics	C14orf166B	-0.33889	0.33042	0.29879	-0.37792	0.18469	0.21689	-0.16097	-0.055352	0.1011	0.22394	0.5264	-0.77753	-0.61319	-0.54278	0.35809	-0.10619	-0.16493	0.2231	0.011861	0.2553	0.26639	0.31855	0.17905	0.28975	0.24908	0.41005	0.26047	0.57226	0.39112	-0.39424	0.4863	0.2745	0.38407	0.38633	0.24908	0.23892	0.35357	0.39367	0.23101	0.19091	0.38181	0.23892	0.20672	0.244	0.2745	0.12708	0.23044	0.24117
Transcriptomics	ARPC2	0.32919	-0.053642	-0.12592	0.18182	0.053642	-0.11462	0.19819	0.26143	-0.042349	0.13932	-0.17109	0.37792	0.66883	0.66347	-0.16544	0.37368	-0.1022	-0.097685	0.034444	-0.08978	0.32301	-0.17335	0.052513	-0.35517	-0.12592	-0.28854	0.068831	-0.36753	-0.18473	0.28967	-0.1135	0.25466	-0.10333	-0.11011	-0.14399	-0.093168	-0.23659	-0.10107	-0.080745	-0.092038	-0.085263	-0.18125	-0.086392	0.080745	0.029927	-0.37324	0.13269	-0.10559
Transcriptomics	RAB27A	0.40486	-0.10785	-0.49972	-0.048052	-0.13608	-0.33936	0.090909	0.30322	-0.068323	-0.01548	-0.1677	0.18701	0.26494	0.28402	-0.058159	0.52456	-0.22078	-0.26708	-0.17335	-0.10107	-0.28793	-0.1406	-0.20836	-0.65895	-0.070582	-0.54263	-0.13506	-0.34416	-0.13106	0.39921	-0.2332	0.10672	-0.097685	-0.3913	-0.37098	-0.45793	-0.49746	-0.45793	-0.37098	0.047995	-0.29757	-0.36985	-0.214	-0.34952	-0.25353	-0.22417	0.10898	-0.28515
Transcriptomics	PAIP1	0.21513	-0.29983	-0.2716	0.038961	-0.027668	0.038961	0.14512	0.17899	-0.13495	0.25077	-0.21513	0.33377	0.57403	0.2603	-0.20384	0.22632	-0.050254	-0.21287	-0.20949	-0.12027	0.15583	0.13495	0.087521	-0.27273	-0.53924	-0.3563	-0.032468	-0.21948	-0.00516	0.30322	0.028797	0.12479	-0.1022	-0.29193	-0.08865	-0.18916	-0.26595	-0.1598	-0.19593	0.037832	-0.25466	-0.12366	-0.047995	-0.17561	-0.24224	-0.38566	0.24449	-0.0073405
Transcriptomics	INPP5B	0.18464	-0.44777	-0.45003	0.37273	0.12366	-0.19029	0.27837	0.33258	0.20836	-0.079463	-0.36759	0.64156	0.68831	0.38679	-0.21965	0.37368	-0.12253	-0.076228	0.12027	-0.017504	-0.14138	-0.23998	-0.30322	-0.45793	-0.2987	-0.46132	-0.18831	-0.55584	-0.21569	0.34049	-0.39582	0.02428	-0.30661	-0.45003	-0.32806	-0.42292	-0.42631	-0.47826	-0.28515	-0.28402	-0.44438	-0.4489	-0.2716	-0.38453	-0.18803	-0.08865	0.1135	-0.2524
Transcriptomics	PPP2R5A	0.28176	-0.0050819	-0.21062	-0.019481	0.025409	-0.13947	0.19255	0.40824	-0.014116	0.069143	-0.15302	0.085714	0.38701	0.4297	-0.023151	0.50702	-0.22643	-0.11688	-0.0039526	-0.0050819	0.15583	-0.1214	-0.15754	-0.55618	-0.029927	-0.41728	-0.079221	-0.2961	-0.11455	0.25918	-0.055901	0.39243	0.087521	-0.13269	-0.19819	-0.27837	-0.36985	-0.20949	-0.23094	0.10446	-0.096556	-0.24449	-0.080745	-0.064935	0.012987	-0.33597	0.33032	-0.12931
Transcriptomics	LIN37	-0.15415	0.1406	0.52005	-0.064935	0.41615	0.18351	0.055901	0.001694	0.24901	-0.12074	0.39695	-0.33377	-0.68961	-0.25466	0.30661	-0.32807	0.50649	0.4297	0.14399	0.2061	0.17028	0.001694	0.070582	0.42518	-0.054771	0.65895	0.096104	0.33896	0.53148	-0.5336	0.25466	0.12366	0.32468	0.58554	0.52908	0.58103	0.49068	0.60361	0.39469	0.41276	0.61942	0.6917	0.60023	0.47261	0.26934	0.18577	0.32016	0.65556
Transcriptomics	ATP6V1G1	0.30887	-0.42631	-0.44664	0.22727	-0.10785	-0.13608	0.096556	0.25692	-0.2524	0.10836	-0.20271	0.44545	0.72727	0.25466	-0.2987	0.1807	-0.07397	-0.13156	0.10672	-0.050254	0.18473	-0.099944	0.090909	-0.34161	-0.32242	-0.49407	-0.016883	-0.55065	0.058824	0.31677	-0.24675	0.015246	-0.058159	-0.40486	-0.19142	-0.31338	-0.20384	-0.2253	-0.033315	-0.10559	-0.20723	-0.20045	-0.063806	-0.093168	-0.19481	-0.46584	0.086392	-0.17448
Transcriptomics	PTPRC	0.31564	-0.24224	-0.54489	0.22208	0.04009	-0.23659	0.31903	0.52569	0.0084698	-0.24458	-0.27724	0.35325	0.61429	0.3913	-0.045737	0.48772	-0.26256	-0.079616	0.19142	0.036702	-0.060888	-0.40824	-0.36194	-0.57199	0.099944	-0.5144	-0.24545	-0.57792	-0.17441	0.38001	-0.33258	0.19255	0.001694	-0.33258	-0.26934	-0.45567	-0.37098	-0.43535	-0.22868	-0.066064	-0.26143	-0.37775	-0.1598	-0.23207	-0.049125	-0.12705	0.18125	-0.31451
Transcriptomics	TCEAL3	0.12991	-0.35753	-0.40215	-0.12277	0.01412	0.097148	-0.01638	0.26942	0.094324	0.12597	-0.35583	0.063657	0.36246	0.36374	0.050833	0.18868	-0.12765	-0.11748	-0.14346	-0.036148	0.10325	-0.073426	-0.07512	-0.50833	-0.44225	-0.1508	0.02923	-0.11887	-0.054724	0.33832	0.081898	0.34115	0.046315	-0.25078	-0.14572	-0.3259	-0.35583	-0.2344	-0.33832	0.29709	-0.095453	-0.085287	0.019768	-0.097148	0.12482	-0.35301	0.29879	-0.019204
Transcriptomics	ID2	0.48504	-0.20836	-0.44325	0.15325	-0.13495	-0.44551	0.049125	0.23772	-0.21739	0.011352	-0.17335	0.36104	0.4039	0.41615	-0.19481	0.17368	-0.051383	-0.13495	0.059289	-0.11462	-0.060888	-0.29757	-0.019763	-0.61942	-0.016375	-0.45003	-0.054545	-0.5	-0.042312	0.40034	-0.34274	-0.015246	0.044608	-0.2795	-0.33032	-0.36985	-0.39018	-0.2716	-0.16996	-0.0084698	-0.066064	-0.1677	-0.093168	0.015246	-0.13382	-0.43761	-0.075099	-0.19029
Transcriptomics	PDZD4	0.50085	-0.21739	-0.25918	0.15455	0.26708	-0.3913	0.35968	0.57086	-0.14173	-0.12281	-0.12253	0.25195	0.43896	0.62281	-0.24449	0.27018	0.12366	0.25127	0.23546	-0.24337	0.013416	-0.53247	-0.11124	-0.43196	0.035573	-0.11688	-0.17792	-0.5039	-0.12281	0.45342	-0.21062	0.26482	0.08978	-0.13382	-0.12818	-0.25127	-0.37436	-0.076228	-0.22868	0.099944	0.08978	0.086392	0.12027	0.27047	0.11124	-0.46132	0.28063	0.19593
Transcriptomics	---	-0.1869	0.25692	0.2908	-0.16753	-0.0073405	0.28854	-0.24788	-0.45003	-0.037832	0.1806	0.40486	-0.18701	-0.41688	-0.43874	0.044608	-0.13684	0.18351	-0.10559	-0.26595	0.12818	0.031992	0.4297	0.33597	0.61604	-0.085263	0.20045	0.25065	0.36623	0.11455	-0.44664	0.037832	-0.34274	-0.41276	0.060418	0.10785	0.26821	0.31338	0.17448	0.15415	-0.24337	-0.15076	-0.017504	-0.1214	-0.23433	-0.17674	0.29193	-0.26708	0.0039526
Transcriptomics	LOC283914	-0.15189	0.41841	0.49633	0.11039	0.066064	0.14737	0.054771	-0.214	0.10672	-0.050568	0.32016	-0.14545	-0.41558	-0.11914	0.15867	-0.29825	0.28176	0.059289	-0.042349	-0.16657	-0.15996	0.2253	0.045737	0.59571	0.26482	0.33371	0.04026	0.31299	0.00516	-0.26369	0.13269	-0.2061	0.1135	0.38792	0.29418	0.41841	0.30096	0.27047	0.19142	-0.016375	0.18464	0.27273	0.095426	0.20836	0.14963	0.40034	-0.18577	0.16544
Transcriptomics	HOXA13	-0.5144	0.15302	0.39018	-0.067532	0.076228	0.38905	-0.095426	-0.3258	0.23659	0.19505	0.034444	-0.29481	-0.34286	-0.4105	0.39921	-0.59474	0.08865	0.17222	0.054771	0.20723	0.10423	0.12592	0.27612	0.59345	0.085263	0.69509	0.27273	0.61429	0.26109	-0.39243	0.476	-0.0084698	0.345	0.51214	0.59119	0.60587	0.66234	0.48165	0.476	0.24337	0.39808	0.53473	0.39582	0.34274	0.24901	0.41615	-0.10107	0.26256
Transcriptomics	SMC2	0.52908	-0.068323	-0.55618	-0.25714	-0.57425	-0.32693	-0.32468	-0.076228	-0.57651	-0.00516	0.042349	0.024675	0.24805	0.25579	-0.42405	0.60351	-0.33258	-0.4297	-0.2795	-0.20045	-0.075335	0.17899	-0.1022	-0.43083	0.017504	-0.70977	-0.19481	-0.25455	-0.47162	0.49972	-0.36533	-0.31903	-0.48052	-0.61829	-0.66798	-0.58554	-0.52908	-0.50762	-0.40373	-0.36872	-0.51779	-0.70864	-0.6262	-0.43083	-0.40937	-0.40147	-0.30999	-0.56861
Transcriptomics	GLTP	0.40937	-0.11688	-0.33484	0.05974	-0.27612	-0.25127	0.059289	0.14399	-0.4218	0.2838	-0.12366	0.10779	0.41039	0.47149	-0.21062	0.35263	-0.1869	-0.07397	0.083004	-0.12592	0.11662	-0.11801	0.090909	-0.51101	-0.12253	-0.48165	-0.11169	-0.4039	-0.023736	0.44777	-0.27499	0.21513	-0.25692	-0.29757	-0.46019	-0.34726	-0.29757	-0.15867	-0.10333	-0.2524	-0.1598	-0.41841	-0.3258	-0.053642	-0.24562	-0.5878	-0.0039526	-0.22981
Transcriptomics	PAIP1	0.44664	-0.33032	-0.32693	0.18571	-0.18577	-0.079616	0.17787	0.24224	-0.20384	-0.021672	-0.31564	0.33506	0.60649	0.63298	-0.32693	0.44561	0.023151	-0.12592	0.017504	-0.23433	-0.011352	-0.1598	-0.12366	-0.28628	-0.27837	-0.35743	-0.22078	-0.39221	-0.28173	0.4489	-0.22756	0.045737	-0.32355	-0.36759	-0.20497	-0.2253	-0.31112	-0.30548	-0.22417	-0.081875	-0.32242	-0.26934	-0.1869	-0.17561	-0.22981	-0.34952	0.051383	-0.16206
Transcriptomics	SCNN1G	-0.25805	0.33258	0.55167	-0.27013	0.1406	0.0073405	-0.36646	-0.44777	-0.0062112	0.21156	0.41954	-0.55195	-0.81818	-0.476	-0.098814	-0.23684	0.17787	0.20271	-0.032185	0.099944	0.089783	0.096556	0.27273	0.4568	0.085263	0.55167	0.28312	0.36883	0.24252	-0.56522	0.15528	0.0062112	-0.035573	0.35404	0.23094	0.40599	0.39469	0.41954	0.25127	0.10333	0.34839	0.37098	0.21852	0.18238	0.07397	0.062676	0.037832	0.37775
Transcriptomics	ANXA13	-0.084133	0.19819	0.40034	0.1039	0.32355	0.029927	0.099944	0.11575	0.17787	-0.21775	0.36759	-0.20779	-0.51169	-0.16206	0.29531	-0.27018	0.40147	0.41276	0.26256	0.080745	0.129	0.0039526	-0.099944	0.35517	0.075099	0.4489	-0.072727	0.18312	0.52322	-0.35065	0.14737	-0.001694	0.5878	0.54828	0.52908	0.52005	0.4489	0.5528	0.44551	0.40937	0.63749	0.66121	0.60926	0.57312	0.2987	0.10672	0.3642	0.55844
Transcriptomics	PAIP2	0.30661	-0.4952	-0.38453	0.20649	0.15641	-0.12366	0.36646	0.44325	0.071711	-0.27141	-0.38679	0.52857	0.60649	0.57312	-0.13495	0.22982	0.097685	0.16544	0.13608	-0.18803	-0.052632	-0.27273	-0.31225	-0.2795	-0.35968	-0.13495	-0.38442	-0.33117	-0.20949	0.54602	-0.14399	0.012987	-0.026539	-0.21739	-0.029927	-0.1485	-0.28289	-0.11237	-0.16657	0.001694	-0.12366	-0.012987	0.053642	0.069452	-0.064935	-0.23546	0.25466	0.1022
Transcriptomics	TARP	0.56973	-0.24449	-0.57425	-0.020779	-0.25353	-0.43986	0.066064	0.43648	-0.27837	-0.01548	-0.25579	0.24805	0.56623	0.59684	-0.17674	0.48246	-0.15076	-0.15076	0.07284	-0.16996	-0.034056	-0.26821	-0.075099	-0.61152	0.063806	-0.53924	-0.019481	-0.53377	-0.23426	0.65669	-0.33823	0.13721	-0.022021	-0.34387	-0.39356	-0.47374	-0.46923	-0.30999	-0.23433	-0.083004	-0.13834	-0.36194	-0.23772	0.037832	-0.0028233	-0.41841	-0.071711	-0.3563
Transcriptomics	HS3ST1	-0.35517	0.19932	0.24788	-0.15455	0.20271	0.44777	0.058159	-0.050254	0.2061	-0.19298	0.23772	-0.31299	-0.30779	-0.44099	0.35968	-0.17193	0.0073405	0.071711	-0.014116	0.2332	0.042312	0.14399	-0.032185	0.67928	0.2908	0.44777	0.072727	0.41948	0.16409	-0.37211	0.3642	0.019763	0.30887	0.47826	0.52117	0.43309	0.5336	0.38001	0.32806	0.11124	0.22981	0.32016	0.23546	0.15754	0.28741	0.57425	0.018634	0.1022
Transcriptomics	GLUD1P2	-0.23546	0.52456	0.34387	-0.17013	-0.00056465	0.17448	-0.18351	-0.37775	-0.029927	-0.0072239	0.57199	-0.23377	-0.36494	-0.50085	0.078487	-0.25088	-0.11914	-0.27386	-0.39582	0.014116	-0.052632	0.4681	0.055901	0.38453	0.42857	0.090909	0.13377	0.48571	-0.038184	-0.38792	0.2987	-0.36081	0.061547	0.15302	0.025409	0.10107	0.067194	-0.026539	-0.092038	-0.092038	-0.029927	0.0062112	-0.11688	-0.096556	0.077357	0.47149	-0.30548	-0.07284
Transcriptomics	CYP17A1	-0.11124	0.34161	0.35968	-0.45195	-0.090909	0.35178	-0.33145	-0.32806	-0.15867	0.32921	0.56183	-0.7	-0.64286	-0.45342	0.22981	-0.061404	0.069452	0.083004	-0.083004	0.31338	0.34985	0.41389	0.47149	0.55844	0.19593	0.38114	0.34286	0.62727	0.3065	-0.52908	0.34161	-0.081875	-0.063806	0.30548	0.25918	0.4218	0.51214	0.45455	0.37662	0.0028233	0.19255	0.17109	0.080745	0.1135	-0.035573	0.068323	-0.17448	0.084133
Transcriptomics	BZW1	0.2253	-0.077357	-0.30887	0.3013	0.15528	-0.1598	0.1598	0.12027	-0.0073405	0.089783	-0.30661	0.36234	0.44026	0.52569	-0.087521	0.17368	-0.11575	-0.087521	0.054771	0.033315	0.16615	-0.345	-0.12931	-0.43196	-0.19706	-0.2061	-0.11039	-0.37273	-0.065015	0.23546	-0.30999	0.13721	-0.015246	-0.055901	-0.12027	-0.18464	-0.24449	-0.15867	-0.16093	-0.0062112	-0.12818	-0.12366	-0.081875	-0.084133	-0.046866	-0.32016	0.18125	-0.038961
Transcriptomics	CTD-2286N8.2	-0.31677	0.010728	0.28063	-0.083117	0.59458	0.090909	-0.016375	0.0073405	0.44438	0.36842	0.27837	-0.21818	-0.21169	-0.2908	0.21739	-0.28596	0.18012	0.33597	0.08865	0.27386	0.34778	0.08978	0.25353	0.41841	-0.29983	0.72332	0.43896	0.4013	0.50877	-0.41502	0.39018	0.19368	0.49294	0.4952	0.7109	0.5799	0.52569	0.53021	0.40937	0.43422	0.50762	0.70412	0.6533	0.41728	0.31903	0.13608	0.51101	0.63862
Transcriptomics	TAF11	0.30548	-0.10898	-0.22304	0.27662	-0.02428	-0.16657	0.22756	0.214	-0.19932	-0.20949	-0.30887	0.53117	0.71688	0.66911	-0.34049	0.35789	-0.11914	-0.085263	0.026539	-0.31225	0.069143	-0.2253	-0.30096	-0.29418	-0.13156	-0.36759	-0.38312	-0.4961	-0.43447	0.50762	-0.24337	0.0073405	-0.094297	-0.214	-0.20158	-0.20158	-0.34274	-0.1869	-0.21287	-0.14963	-0.18351	-0.20497	-0.15302	0.037832	-0.028797	-0.34839	0.16206	-0.08865
Transcriptomics	GZMB	0.50988	-0.18351	-0.476	-0.14026	-0.26595	-0.35517	0.1135	0.39582	-0.3258	-0.28999	-0.17109	0.33506	0.4961	0.43309	-0.08978	0.38772	-0.17899	-0.14963	-0.049125	-0.12479	-0.01548	-0.21513	-0.11688	-0.63185	0.15415	-0.56861	-0.18831	-0.43506	-0.25697	0.60248	-0.19481	0.05703	-0.067194	-0.32806	-0.46245	-0.44212	-0.4681	-0.23772	-0.22078	-0.1406	-0.093168	-0.35855	-0.22643	0.064935	-0.066064	-0.3179	-0.13947	-0.34613
Transcriptomics	EZR	-0.08978	0.081875	0.11462	0.24286	0.30999	-0.24562	0.23998	0.2524	0.38905	0.11249	-0.27386	0.038961	0.13247	0.48165	0.15867	0.084211	-0.038961	0.36872	0.3371	-0.13608	0.10217	-0.28402	-0.13043	-0.19368	-0.069452	0.28741	0.032468	-0.068831	-0.073271	0.22643	0.044608	0.38114	0.39808	0.27273	0.23546	0.20836	0.025409	0.18238	0.11011	0.22417	0.30548	0.25466	0.2716	0.40373	0.2908	-0.15867	0.43874	0.31451
Transcriptomics	RNF213	0.16657	-0.34049	-0.345	-0.10779	-0.062676	-0.15641	0.096556	0.35178	0.010728	-0.044376	-0.45455	0.24026	0.52468	0.46132	-0.001694	0.23333	-0.20045	0.076228	0.14286	0.085263	0.17647	-0.2603	-0.07397	-0.53473	-0.13043	-0.20384	-0.058442	-0.24416	-0.29205	0.45906	-0.043478	0.27612	-0.027668	-0.18577	-0.19819	-0.23998	-0.27612	-0.094297	-0.10107	-0.020892	-0.031056	-0.214	-0.062676	0.1214	0.077357	-0.2987	0.11011	-0.14286
Transcriptomics	RP11-403N16.3	-0.28289	0.1135	0.37324	-0.1026	0.04122	0.28628	0.0039526	-0.078487	0.16093	-0.20537	-0.17335	-0.28571	-0.57662	-0.11801	0.51553	-0.3807	0.45567	0.34952	0.17335	0.2603	0.083591	-0.036702	0.00056465	0.34161	-0.20723	0.55392	-0.084416	0.38052	0.21981	-0.31564	0.14399	0.070582	0.2332	0.4952	0.57199	0.58329	0.53924	0.53924	0.44099	0.49181	0.45906	0.55618	0.5336	0.34274	0.15528	0.22078	0.25014	0.46358
Transcriptomics	PNKD	0.4681	-0.36646	-0.35404	0.1961	-0.11575	-0.25466	0.07284	0.38792	-0.094297	0.17234	-0.045737	0.090909	0.35584	0.44099	-0.21852	0.35439	0.016375	0.00056465	0.15867	-0.19932	0.021672	-0.11124	-0.060418	-0.60813	-0.24111	-0.38905	-0.036364	-0.38701	0.11042	0.31564	-0.14963	0.18577	0.04122	-0.41276	-0.29305	-0.38227	-0.39808	-0.36646	-0.23207	0.18238	-0.075099	-0.14286	0.0073405	-0.049125	-0.11462	-0.56861	0.22417	-0.033315
Transcriptomics	---	-0.33371	0.04122	0.3371	0.057143	0.26821	0.21852	-0.093168	-0.20949	0.18238	-0.0258	0.068323	-0.27403	-0.34935	-0.20949	0.04122	-0.41754	0.29531	0.33484	0.12705	-0.045737	0.023736	-0.035573	0.046866	0.60361	-0.053642	0.74026	0.05974	0.4013	0.060888	-0.29983	0.23772	-0.1485	0.21965	0.29983	0.54263	0.44438	0.41954	0.31451	0.1869	0.32016	0.28289	0.60361	0.43422	0.27273	0.25579	0.214	0.13608	0.49633
Transcriptomics	HECTD1	0.2987	-0.33371	-0.55392	-0.050649	-0.18238	-0.27837	0.070582	0.37098	-0.026539	0.12693	-0.36759	0.28442	0.54156	0.32919	-0.001694	0.36842	-0.20497	-0.19481	-0.044608	-0.02428	-0.077399	-0.05703	-0.04009	-0.61491	-0.24562	-0.50198	0.024675	-0.33636	-0.067079	0.52456	-0.15415	0.16318	0.04009	-0.35178	-0.26143	-0.40147	-0.39921	-0.30774	-0.20271	0.028797	-0.20384	-0.31451	-0.14173	-0.12818	-0.1135	-0.29644	0.085263	-0.28854
Transcriptomics	LOC100128993	-0.26143	0.07284	0.24337	-0.26623	-0.12479	0.18351	-0.43986	-0.50649	-0.028797	0.11662	0.24449	-0.28571	-0.56883	-0.56296	0.0050819	-0.28947	0.076228	-0.16996	-0.1406	0.345	0.085655	0.26256	0.15754	0.42405	0.043478	0.22643	0.25195	0.26364	0.36223	-0.48842	0.029927	-0.12027	-0.012987	0.36985	0.11688	0.24337	0.38227	0.31677	0.29531	-0.094297	0.21174	0.085263	-0.037832	0.036702	0.08865	0.30774	-0.30322	-0.054771
Transcriptomics	---	-0.18125	0.30999	0.2987	0.067532	0.084133	0.12931	0.08865	-0.14286	0.16318	-0.23839	0.04122	-0.21039	-0.57662	-0.15415	0.39582	-0.25614	0.32129	0.22191	0.16093	0.12479	-0.24458	-0.064935	-0.042349	0.53586	0.23094	0.4218	-0.062338	0.26364	0.11662	-0.27612	-0.07284	-0.16544	0.1022	0.47261	0.41276	0.47036	0.46584	0.38227	0.36081	0.049125	0.20723	0.29757	0.17448	0.15076	0.060418	0.45455	-0.12253	0.15641
Transcriptomics	ID2	0.35404	-0.08978	-0.33032	0.12987	-0.20384	-0.19481	0.04122	0.17899	-0.22078	0.083591	0.04009	0.36364	0.5961	0.32806	-0.10898	0.24035	-0.27273	-0.20045	-0.015246	-0.1022	0.17441	-0.086392	0.13721	-0.53924	0.12479	-0.52569	0.07013	-0.37532	-0.071207	0.31338	-0.10333	0.0062112	-0.12479	-0.39808	-0.46584	-0.3642	-0.32129	-0.31112	-0.11124	-0.23772	-0.14399	-0.36646	-0.22868	-0.028797	-0.099944	-0.36307	-0.21626	-0.37436
Transcriptomics	ITIH6	0.0095991	0.33032	-0.049125	-0.062338	-0.28289	-0.25918	-0.14625	-0.3179	-0.27273	-0.048504	0.39808	-0.077922	-0.22078	-0.40034	-0.11914	0.0070175	-0.24675	-0.35065	-0.25692	-0.055901	-0.3065	0.27724	-0.08865	0.10107	0.49633	-0.28967	-0.054545	0.077922	-0.10423	0.0095991	-0.14625	-0.38227	-0.13608	-0.052513	-0.34049	-0.22191	-0.11801	-0.23207	-0.12705	-0.43986	-0.20497	-0.39808	-0.47826	-0.25579	-0.18125	0.40599	-0.5144	-0.39469
Transcriptomics	RP11-546D6.3	0.37436	-0.087521	-0.46245	0.23896	-0.20271	-0.34839	0.25353	0.32806	-0.25466	-0.32714	-0.2987	0.45455	0.72338	0.43535	-0.36872	0.65263	-0.32129	-0.25579	0.0073405	-0.42857	-0.31889	-0.38001	-0.33371	-0.37211	0.1869	-0.60474	-0.3013	-0.7013	-0.43447	0.59571	-0.34726	0.062676	-0.14286	-0.45906	-0.34161	-0.42631	-0.38792	-0.4952	-0.27724	-0.19706	-0.36081	-0.40711	-0.28289	-0.25353	-0.15867	-0.16206	0.019763	-0.41163
Transcriptomics	MOGS	0.083004	-0.40711	-0.23659	0.31169	0.42744	0.001694	0.37211	0.43761	0.44777	-0.021672	-0.45793	0.48182	0.37273	0.38566	0.19932	0.12456	0.21513	0.24788	0.28063	0.19593	0.04644	-0.42857	-0.047995	-0.28741	-0.48617	0.034444	0.0025974	-0.36364	0.18679	0.070582	-0.20836	0.27837	0.037832	-0.015246	0.20723	0.052513	-0.0084698	0.036702	0.08978	0.1869	-0.0039526	0.15867	0.29531	-0.010728	-0.012987	-0.16431	0.41502	0.19819
Transcriptomics	ARID4B /// RBM34	0.34049	-0.18238	-0.2908	0.37143	0.0039526	-0.095426	0.062676	-0.0062112	-0.24111	0.3354	-0.037832	0.22727	0.45325	0.45567	-0.3913	0.21579	-0.061547	-0.043478	0.060418	-0.27724	0.15996	-0.11801	0.10559	-0.24675	-0.33145	-0.24675	-0.077922	-0.34545	0.089783	0.24901	-0.26256	-0.022021	-0.28063	-0.38566	-0.26595	-0.25805	-0.24901	-0.27273	-0.20836	-0.16657	-0.31677	-0.19368	-0.20158	-0.22756	-0.31225	-0.61604	0.08978	-0.019763
Transcriptomics	TARP /// TRGC2	0.5223	-0.30209	-0.56183	-0.083117	-0.18238	-0.38792	0.15076	0.43083	-0.23433	-0.31682	-0.26934	0.33506	0.49221	0.46923	-0.17674	0.47895	-0.19029	-0.10672	0.037832	-0.1022	-0.12487	-0.35855	-0.2795	-0.57538	0.16431	-0.476	-0.27532	-0.47792	-0.27761	0.61942	-0.2603	0.052513	-0.028797	-0.28515	-0.36533	-0.42405	-0.44325	-0.26821	-0.23546	-0.11688	-0.12818	-0.31903	-0.20836	0.017504	-0.068323	-0.24901	-0.081875	-0.32806
Transcriptomics	ACAA1	0.49746	-0.23885	-0.40373	-0.074026	-0.31451	-0.33258	-0.12592	0.0084698	-0.51666	0.11249	-0.075099	0.29481	0.51818	0.31451	-0.4568	0.39825	-0.17335	-0.25692	-0.055901	-0.083004	0.19092	-0.19481	0.092038	-0.30209	-0.061547	-0.39808	-0.027273	-0.47013	-0.01548	0.38566	-0.24901	-0.0050819	-0.14286	-0.20723	-0.25805	-0.17674	-0.11914	-0.060418	0.053642	-0.17787	-0.031056	-0.19706	-0.15754	0.068323	-0.20836	-0.45567	-0.13834	-0.25466
Transcriptomics	RGMB-AS1	-0.34397	0.14685	0.34171	0.01494	-0.022028	0.44394	0.02937	-0.10167	0.14798	-0.3015	0.031065	-0.29815	-0.41897	-0.24117	0.36487	-0.29574	0.1734	0.080203	0.11579	0.26207	0.060919	0.13273	-0.23892	0.43716	0.17905	0.29935	-0.16109	0.32218	0.14559	-0.36995	0.16267	0.01525	0.22141	0.45354	0.34341	0.32533	0.38859	0.26377	0.24852	0.16267	0.23892	0.19204	0.15476	0.14007	0.28015	0.50833	-0.0050833	0.088676
Transcriptomics	NDUFV1	0.18012	-0.37775	-0.39695	-0.14935	0.12027	0.0095991	0.18012	0.44438	0.0028233	0.040248	-0.30548	0.10909	0.46234	0.26369	0.096556	0.27368	-0.087521	0.043478	0.053642	0.21062	0.27141	-0.2061	0.0095991	-0.32242	-0.29757	-0.075099	0.024675	-0.16753	0.089783	0.28967	0.083004	0.37324	0.16318	-0.044608	0.12931	-0.084133	-0.059289	0.050254	0.010728	0.24788	0.059289	0.055901	0.19932	0.10785	0.075099	-0.23772	0.36646	0.058159
Transcriptomics	MTMR10	-0.33145	0.12027	0.19481	-0.13247	0.061547	0.2253	-0.26256	-0.40486	0.0028233	-0.24871	0.060418	0.10519	-0.27273	-0.4105	0.13382	-0.52456	0.19593	-0.08865	-0.23772	0.20723	-0.0072239	-0.0084698	0.078487	0.32242	0.054771	0.32129	0.11169	0.20649	-0.034056	-0.35968	0.029927	-0.33936	-0.11575	0.1485	0.11011	0.15076	0.20836	0.13382	0.052513	0.04122	0.13495	0.22643	0.12592	0.036702	0.21513	0.44325	-0.30322	0.087521
Transcriptomics	CCNY	0.29757	-0.13947	-0.50085	0.02987	-0.10333	-0.1869	-0.2716	-0.11688	-0.27499	0.32301	-0.036702	0.27403	0.55714	0.2603	-0.40373	0.24737	-0.37211	-0.33371	-0.15189	-0.046866	0.17441	-0.20045	0.19481	-0.46923	-0.027668	-0.39243	0.21948	-0.37013	-0.17853	0.2061	-0.29305	-0.08865	-0.37436	-0.53247	-0.5223	-0.52795	-0.40599	-0.47826	-0.35404	-0.27386	-0.39243	-0.43422	-0.38679	-0.34726	-0.13721	-0.47149	-0.24111	-0.39921
Transcriptomics	GTDC1	0.30209	-0.2795	-0.4105	0.031169	0.0050819	-0.39356	0.059289	0.39356	-0.043478	-0.21981	-0.24788	0.32727	0.47792	0.43874	-0.20271	0.42105	-0.20723	0.070582	0.17222	-0.069452	0.1063	-0.31677	-0.29757	-0.67815	-0.094297	-0.4218	-0.21558	-0.52338	-0.23839	0.4489	-0.28967	0.13608	-0.010728	-0.35743	-0.38001	-0.42405	-0.4489	-0.26708	-0.21852	-0.047995	-0.067194	-0.28063	-0.086392	0.025409	0.017504	-0.43535	0.25127	-0.12479
Transcriptomics	TRMU	-0.50988	0.1406	0.53134	0.024675	0.3913	0.26934	0.095426	0.11462	0.37324	-0.14345	0.17448	-0.32987	-0.49221	-0.4218	0.47713	-0.5807	0.30661	0.53811	0.30322	0.25353	0.19505	0.022021	0.042349	0.24562	0.083004	0.58893	0.068831	0.42078	0.31269	-0.52569	0.40147	0.11011	0.48504	0.36533	0.47036	0.37098	0.36646	0.38114	0.2716	0.47487	0.52117	0.60926	0.62846	0.42857	0.40937	0.2524	0.34839	0.58103
Transcriptomics	ADRA1D	-0.23094	0.23094	0.37775	0.15714	0.30548	0.19593	0.16996	-0.077357	0.34613	0.26935	0.27273	-0.38312	-0.67662	-0.3258	0.41389	-0.4614	0.42405	0.2603	0.1022	0.076228	-0.15583	0.2524	0.20723	0.55957	-0.049125	0.52343	0.16753	0.52078	0.44479	-0.4297	0.18125	-0.055901	0.30774	0.46019	0.54828	0.46584	0.41163	0.345	0.25353	0.24675	0.18577	0.47713	0.30774	0.083004	-0.015246	0.32468	0.090909	0.41615
Transcriptomics	HTR1B	-0.25586	0.034454	0.34962	-0.29091	0.038972	0.24513	-0.088676	0.10957	0.1638	-0.26316	0.32081	-0.45859	-0.58655	-0.50777	0.34792	-0.32207	0.22141	0.24569	0.12934	0.34792	0.095975	0.22141	-0.040666	0.17905	0.28297	0.26038	0.037025	0.38844	0.2322	-0.46371	0.32703	-0.010167	0.26151	0.22141	0.17848	0.13555	0.19147	0.19317	0.14177	0.2649	0.3355	0.23101	0.28297	0.2248	0.29144	0.36204	0.0022592	0.17735
Transcriptomics	ERLEC1	0.36646	-0.35517	-0.64314	-0.050649	-0.22868	0.12253	-0.047995	0.061547	-0.12931	-0.17028	-0.27837	0.36364	0.38571	0.22417	-0.10333	0.35614	-0.15528	-0.44777	-0.22868	0.16544	-0.13519	-0.071711	-0.18351	-0.2908	-0.07284	-0.52005	-0.18571	-0.22468	-0.22807	0.23546	-0.345	-0.27273	-0.42067	-0.41502	-0.36533	-0.47036	-0.38227	-0.47713	-0.36194	-0.27047	-0.60023	-0.54037	-0.476	-0.58103	-0.30096	-0.022021	-0.36533	-0.58554
Transcriptomics	ALX4	-0.17899	0.33258	0.4218	0.031169	0.12027	0.2795	0.1214	-0.078487	0.031056	-0.26935	0.38001	-0.19351	-0.37403	-0.36533	0.13495	-0.11228	0.14625	0.064935	0.025409	0.014116	-0.019608	0.1598	-0.046866	0.63862	0.32693	0.20497	-0.067532	0.18442	0.21362	-0.39921	0.16544	-0.081875	0.18238	0.38905	0.35404	0.40711	0.43648	0.34274	0.32693	-0.023151	0.19368	0.25353	0.16431	0.13721	0.08978	0.38679	-0.001694	0.11575
Transcriptomics	SLX1A-SULT1A3 /// SLX1B-SULT1A4	0.53021	-0.13156	-0.41954	0.13506	-0.29193	-0.45793	0.064935	0.25579	-0.48391	-0.13313	-0.19368	0.26364	0.48701	0.42292	-0.53811	0.59474	-0.087521	-0.20949	0.055901	-0.29531	-0.17441	-0.23998	-0.15302	-0.39808	-0.001694	-0.70299	-0.24935	-0.73377	-0.37461	0.48617	-0.59006	-0.016375	-0.36985	-0.5223	-0.47149	-0.51779	-0.47261	-0.43986	-0.30322	-0.27612	-0.41502	-0.50875	-0.3913	-0.30209	-0.30322	-0.42857	-0.0062112	-0.35178
Transcriptomics	GLRX5	0.18125	-0.37436	-0.35855	0.067532	0.18351	-0.099944	0.38001	0.5799	0.099944	-0.11662	-0.25805	0.25584	0.58312	0.3179	0.055901	0.14912	-0.11914	0.1485	0.1869	0.066064	0.10836	-0.25579	-0.19029	-0.40486	-0.0050819	-0.12818	-0.1974	-0.17662	-0.1063	0.37549	0.11124	0.19593	0.2603	-0.14399	0.028797	-0.21062	-0.25014	-0.15415	-0.14625	0.15076	-0.012987	0.0073405	0.14512	0.13269	0.097685	-0.10785	0.25353	0.029927
Transcriptomics	C3orf52	-0.046866	0.56522	0.46471	-0.12857	0.15076	0.08865	-0.21739	-0.20497	-0.058159	0.26729	0.37098	-0.48182	-0.59091	-0.13382	0.15189	-0.17193	0.35178	0.050254	-0.11237	0.061547	0.17853	0.2524	0.35517	0.40599	0.086392	0.3258	0.33636	0.37662	0.067079	-0.47036	0.064935	-0.14286	0.16318	0.32693	0.35968	0.33597	0.2061	0.30548	0.085263	0.31112	0.19029	0.39018	0.25466	0.16657	0.14963	-0.034444	0.067194	0.32919
Transcriptomics	FGF18	-0.1869	0.45793	0.41954	-0.29221	0.045737	0.22981	-0.21852	-0.29757	0.0028233	-0.18885	0.43422	-0.38701	-0.63636	-0.40486	0.20723	-0.23158	0.20045	-0.012987	-0.29193	0.055901	-0.03612	0.33145	0.10785	0.476	0.2253	0.3563	0.11169	0.55844	-0.058824	-0.43761	0.27837	-0.33936	0.014116	0.21287	0.24901	0.30774	0.21287	0.18916	0.023151	0.18351	0.11462	0.28063	0.16431	0.034444	0.085263	0.35968	-0.12592	0.19706
Transcriptomics	---	-0.12705	-0.081875	0.55731	-0.064935	0.52456	0.19593	0.28063	0.22304	0.27499	0.003096	0.28967	-0.28312	-0.40649	-0.19706	0.027668	-0.2193	0.43196	0.58554	0.26595	0.012987	0.085655	-0.052513	0.13947	0.48391	-0.087521	0.65217	0.04026	0.26234	0.44892	-0.3913	0.42744	0.30774	0.27837	0.44664	0.56183	0.55844	0.42067	0.59345	0.33936	0.30548	0.48617	0.69283	0.59571	0.4681	0.14625	-0.0050819	0.45793	0.71429
Transcriptomics	---	-0.10672	-0.037832	0.33032	-0.050649	0.18464	0.13721	-0.22191	-0.17335	-0.060418	0.073271	0.29644	-0.35065	-0.47662	-0.29531	-0.0050819	-0.41404	0.42631	0.44664	0.35178	0.25805	0.31476	-0.060418	0.33597	0.58103	0.022021	0.59232	0.23117	0.22727	0.40351	-0.49294	0.028797	-0.16657	0.11124	0.33936	0.43986	0.47149	0.57651	0.56183	0.50649	0.11801	0.42292	0.53586	0.41841	0.42405	0.1485	-0.066064	-0.012987	0.41502
Transcriptomics	C20orf24 /// TGIF2-C20orf24	0.25692	-0.13382	-0.37211	-0.0038961	-0.22981	-0.26369	-0.25353	0.077357	-0.19593	0.17647	-0.25579	0.24156	0.52987	0.47149	-0.26821	0.25614	-0.28854	-0.22417	-0.067194	-0.14737	0.22601	-0.097685	0.035573	-0.71542	-0.11688	-0.49294	0.097403	-0.38442	-0.35191	0.39695	-0.22304	0.022021	-0.13382	-0.50311	-0.5415	-0.55054	-0.57312	-0.43422	-0.39356	-0.061547	-0.21626	-0.39243	-0.26595	-0.083004	0.058159	-0.59006	-0.059289	-0.30999
Transcriptomics	ARPC5L	0.58442	-0.26482	-0.59232	-0.083117	-0.30661	-0.39808	0.10785	0.24788	-0.47374	-0.18885	-0.3913	0.41429	0.47662	0.39243	-0.29757	0.44737	0.017504	-0.18125	-0.094297	-0.27386	-0.30444	-0.21852	0.019763	-0.24675	-0.13947	-0.53134	-0.24416	-0.5039	-0.31063	0.69509	-0.44099	-0.20723	-0.24675	-0.38227	-0.22756	-0.29418	-0.31564	-0.13721	-0.13382	-0.22191	-0.34952	-0.26143	-0.24675	-0.13721	-0.4297	-0.40034	-0.16544	-0.30096
Transcriptomics	NPAS2	-0.53996	0.22705	0.59644	-0.47678	0.15702	0.30556	-0.22988	-0.44564	0.17001	0.11771	0.10844	-0.25528	-0.45924	-0.52584	0.24965	-0.48246	0.067213	0.084157	-0.14685	0.49534	0.34899	0.18018	0.33719	0.57667	0.009037	0.67156	0.36181	0.58396	0.17759	-0.55182	0.47614	0.13499	0.14516	0.72522	0.53318	0.72127	0.67947	0.75346	0.56425	0.086416	0.53205	0.46597	0.34567	0.43999	0.27506	0.45863	-0.051398	0.30274
Transcriptomics	---	-0.32806	0.44325	0.47261	0.12727	0.19706	0.17899	0.025409	-0.16318	0.22304	0.0092879	0.2908	-0.37662	-0.51039	-0.25127	0.23659	-0.27544	0.16431	0.086392	-0.058159	-0.14286	-0.11249	0.13947	-0.061547	0.40599	0.15754	0.43422	0.085714	0.34416	0.16821	-0.3642	0.2524	0.071711	0.30096	0.35743	0.34726	0.31903	0.26143	0.14286	0.052513	0.33597	0.26482	0.38905	0.27499	0.11575	0.27499	0.36872	0.18351	0.34049
Transcriptomics	LOC100506206	-0.11237	0.018634	0.27612	-0.26364	-0.022021	0.21287	-0.15302	-0.14625	0.069452	-0.15583	0.2253	-0.38312	-0.68052	-0.30209	0.17787	-0.36316	0.43083	0.11575	-0.14173	0.036702	-0.19711	0.33032	-0.063806	0.37549	-0.095426	0.37436	-0.08961	0.50909	0.12693	-0.25579	0.19368	-0.23998	0.037832	0.19481	0.2253	0.20836	0.12366	0.17335	-0.028797	0.27273	0.15528	0.29531	0.17899	0.068323	0.07284	0.30887	-0.042349	0.30209
Transcriptomics	BBX	0.23885	-0.20384	-0.22304	0.4026	0.18577	0.084133	0.34726	0.29983	0.10333	-0.16409	-0.19706	0.63377	0.65325	0.41954	-0.020892	0.32632	-0.0084698	-0.1214	0.1022	0.17335	0.27348	-0.2603	-0.1598	-0.2908	-0.21062	-0.39695	-0.15195	-0.50519	0.058824	0.033315	-0.2795	0.1022	-0.1406	-0.12027	-0.066064	-0.083004	-0.10333	-0.1485	0.031056	-0.12479	-0.18577	-0.19255	-0.020892	-0.16318	-0.11124	-0.12592	0.17674	-0.15076
Transcriptomics	TARP /// TRGC2	0.46132	-0.20384	-0.50988	-0.11688	-0.23659	-0.28854	0.04122	0.39582	-0.24788	-0.12281	-0.25692	0.22727	0.55065	0.53134	-0.090909	0.4386	-0.27273	-0.15641	0.023151	-0.069452	0.067079	-0.32016	-0.10107	-0.67928	0.17109	-0.49746	-0.048052	-0.44935	-0.26729	0.5607	-0.18916	0.20497	-0.042349	-0.32129	-0.44438	-0.47036	-0.45229	-0.29193	-0.24111	-0.07397	-0.087521	-0.37211	-0.22191	0.053642	0.07397	-0.37098	-0.095426	-0.38905
Transcriptomics	---	-0.20949	0.18125	0.31112	-0.083117	-0.11914	0.13721	-0.18577	-0.24224	-0.21062	0.03612	0.476	-0.34286	-0.16364	-0.42292	-0.22078	-0.20351	-0.14173	-0.052513	-0.025409	0.033315	0.15996	0.2524	0.07397	0.20158	0.45906	0.02428	0.075325	0.2	-0.093911	-0.33484	0.20384	-0.12818	-0.15528	-0.094297	-0.23546	-0.15189	-0.022021	-0.16996	-0.12931	-0.2332	-0.044608	-0.18238	-0.21965	-0.069452	0.1135	0.22191	-0.30661	-0.11011
Transcriptomics	---	0.018634	0.17109	0.14512	-0.13377	-0.010728	0.086392	-0.083004	-0.16883	0.034444	0.058824	0.61717	-0.34935	-0.54416	-0.46358	0.1214	0.0070175	0.12818	-0.090909	-0.16996	0.012987	-0.23426	0.27724	0.066064	0.45793	0.21513	0.19819	0.19351	0.26104	0.43034	-0.32355	0.14625	-0.11688	0.0073405	0.20384	0.13608	0.22868	0.32016	0.12027	0.19142	-0.017504	0.13608	0.11462	0.026539	-0.058159	-0.043478	0.43535	-0.18238	0.012987
Transcriptomics	NXF1	0.37775	-0.36646	-0.53586	0.23247	0.17448	-0.18125	0.26708	0.18351	-0.10333	0.22394	-0.18351	0.31818	0.55714	0.38905	-0.3642	0.52281	-0.18464	0.010728	0.17109	-0.058159	-0.085655	-0.53473	-0.032185	-0.092038	-0.10333	-0.11914	-0.071429	-0.52078	0.00516	0.33371	-0.3834	0.17222	-0.40147	-0.2332	-0.13834	-0.17787	-0.044608	-0.17561	-0.035573	-0.37098	-0.33597	-0.26369	-0.25353	-0.29418	-0.30999	-0.22868	0.032185	-0.18238
Transcriptomics	---	0.04009	0.21626	0.28063	-0.27143	-0.13834	-0.044608	-0.16883	-0.064935	-0.12818	0.017544	0.44777	-0.63117	-0.69221	-0.35743	0.023151	-0.092982	0.2524	0.16883	0.010728	-0.10446	-0.18679	0.38566	0.13156	0.45116	0.2716	0.24562	0.054545	0.48052	0.077399	-0.18012	0.18803	-0.2524	0.14625	0.13834	0.20045	0.19142	0.15754	0.18916	0.077357	0.11575	0.11914	0.20836	0.081875	0.13269	-0.049125	0.11801	-0.12366	0.16431
Transcriptomics	TMEM129	0.62733	-0.20045	-0.44325	-0.11688	-0.42857	-0.29757	-0.21513	-0.0084698	-0.56748	0.35191	0.044608	-0.044156	0.25844	0.41502	-0.4026	0.25439	-0.069452	-0.2253	-0.11462	-0.25014	-0.003096	-0.029927	0.2524	-0.45003	-0.028797	-0.3913	0.058442	-0.18831	-0.098039	0.43196	-0.21287	-0.11914	-0.32468	-0.47939	-0.50649	-0.4489	-0.4297	-0.34952	-0.32016	-0.13495	-0.25918	-0.33032	-0.34952	-0.13269	-0.30435	-0.63185	-0.33484	-0.2795
Transcriptomics	HOXD9	-0.19481	0.27386	0.33145	0.042857	0.052513	0.23207	-0.070582	-0.22756	-0.051383	-0.11249	0.45003	-0.25974	-0.33247	-0.37888	0.045737	-0.11404	0.10898	0.13156	0.070582	-0.0084698	0.12281	0.29305	0.036702	0.74478	0.17222	0.2987	-0.020779	0.2987	0.19917	-0.34613	0.1485	-0.28854	0.15528	0.2908	0.39243	0.45229	0.52795	0.36985	0.40711	-0.061547	0.17222	0.2716	0.16996	0.16657	0.028797	0.25014	0.00056465	0.16431
Transcriptomics	ALDH1A3	-0.21965	0.50536	0.23094	-0.18312	-0.19819	-0.18464	-0.25692	-0.39921	-0.08865	0.075335	0.18125	-0.43506	-0.67273	-0.39469	0.19368	-0.36491	-0.029927	-0.060418	-0.17109	-0.16544	-0.37668	0.14286	0.04122	0.25127	0.35291	0.27837	0.085714	0.39481	0.079463	-0.084133	0.10898	-0.15076	0.30209	0.32355	0.13495	0.20158	0.20723	0.18012	0.099944	0.1598	0.25918	0.23094	0.049125	0.14399	0.067194	0.28515	-0.20723	0.067194
Transcriptomics	CD300LG	-0.33597	0.081875	0.49407	0.21688	0.21852	0.34726	0.078487	0.047995	0.32693	-0.077399	0.098814	-0.058442	-0.2974	-0.24788	0.34161	-0.49123	0.5528	0.22868	0.11801	0.1022	0.11868	0.25353	0.15641	0.36081	-0.214	0.28854	0.16234	0.20909	0.15789	-0.49633	0.15867	-0.11462	0.1869	0.15528	0.40599	0.31225	0.24562	0.17899	0.16883	0.35743	0.19819	0.43196	0.4489	0.15189	0.22868	0.2524	0.16431	0.39469
Transcriptomics	TBX21	0.43535	-0.16657	-0.51779	0.020779	-0.055901	-0.48617	0.062676	0.33597	-0.092038	-0.042312	-0.12705	0.21818	0.31169	0.40147	-0.13269	0.30351	-0.19819	-0.10898	-0.0028233	-0.1135	-0.1517	-0.24337	-0.22417	-0.73461	0.083004	-0.45003	-0.13766	-0.35714	-0.20743	0.48504	-0.28628	0.014116	0.025409	-0.35743	-0.45116	-0.54828	-0.59797	-0.43874	-0.41728	-0.023151	-0.17787	-0.32468	-0.22191	-0.11124	-0.066064	-0.31112	-0.00056465	-0.22643
Transcriptomics	CEP290	0.50988	-0.26708	-0.32355	0.025974	-0.21739	-0.38001	0.080745	0.090909	-0.38453	0.04644	-0.12931	0.42597	0.47532	0.38679	-0.49181	0.45789	-0.050254	-0.21739	-0.079616	-0.18916	-0.0258	-0.14625	-0.001694	-0.28854	-0.23433	-0.49181	-0.13247	-0.56753	-0.048504	0.45342	-0.37098	0.078487	-0.36307	-0.23094	-0.34613	-0.20271	-0.23772	-0.087521	-0.035573	-0.35178	-0.17899	-0.33823	-0.2987	-0.085263	-0.35517	-0.38001	-0.055901	-0.21965
Transcriptomics	GDF5	0.059289	0.068323	-0.026539	-0.015584	-0.18464	0.1406	-0.22981	-0.29531	-0.16657	0.003096	0.42292	-0.064935	-0.31429	-0.37775	-0.029927	-0.17018	0.15867	-0.26256	-0.30661	0.001694	-0.17647	0.41728	0.086392	0.16883	0.001694	-0.17899	0.032468	0.1987	0.089783	-0.24901	-0.092038	-0.53473	-0.33484	-0.2795	-0.24337	-0.19481	-0.11801	-0.27386	-0.20949	-0.17109	-0.30887	-0.2061	-0.25579	-0.40937	-0.2603	0.18803	-0.39469	-0.16996
Transcriptomics	---	-0.21739	0.24224	0.34161	-0.41299	-0.0039526	0.059289	-0.14963	-0.28289	0.043478	-0.079463	0.35855	-0.30649	-0.56104	-0.59571	0.083004	0.075439	0.036702	-0.0028233	-0.19368	0.14737	-0.042312	0.37775	0.052513	0.71767	0.079616	0.34161	0.066234	0.42727	0.20124	-0.29531	0.28063	-0.12027	0.15528	0.50762	0.47261	0.60813	0.58893	0.57764	0.50649	-0.037832	0.28515	0.28515	0.17674	0.18464	-0.075099	0.46132	0.012987	0.14399
Transcriptomics	PELI2	0.14399	-0.04009	-0.19819	0.19091	0.042349	-0.2332	0.18238	0.16883	0.11011	0.20124	-0.3371	0.4	0.55844	0.54941	-0.061547	0.24386	-0.21174	-0.18125	-0.061547	-0.060418	0.069143	-0.18464	-0.1214	-0.55392	-0.15754	-0.28176	0.0090909	-0.30779	-0.25903	0.35065	-0.12931	0.25579	-0.043478	-0.11801	-0.22417	-0.2253	-0.37662	-0.28063	-0.2524	-0.025409	-0.13269	-0.25127	-0.15302	-0.061547	0.037832	-0.15189	0.12705	-0.12931
Transcriptomics	---	-0.29531	0.25918	0.42067	0.10649	0.23546	0.26256	0.11124	-0.054771	0.39243	-0.12074	0.31112	-0.17922	-0.43636	-0.30774	0.3179	-0.27193	0.2603	0.086392	-0.035573	0.022021	-0.20124	0.1677	-0.063806	0.4218	0.1598	0.36194	0.12208	0.33247	0.13313	-0.44777	0.21739	-0.052513	0.10898	0.2524	0.29757	0.29193	0.24449	0.05703	0.070582	0.18351	0.13495	0.26369	0.21513	-0.012987	0.20384	0.5799	0.016375	0.20836
Transcriptomics	C7orf55	0.25127	-0.016375	-0.36533	0.038961	0.1677	-0.051383	0.071711	0.23885	-0.16657	0.058824	-0.078487	0.24675	0.55065	0.41502	-0.075099	0.3	-0.23094	-0.070582	-0.12479	-0.12818	0.25697	-0.26708	0.02428	-0.48391	-0.12705	-0.23433	0.0012987	-0.3026	-0.15583	0.2987	-0.055901	0.15528	-0.061547	-0.34274	-0.24675	-0.34613	-0.36081	-0.23998	-0.3258	0.093168	-0.13834	-0.10333	-0.0084698	-0.067194	0.053642	-0.48955	0.25692	-0.0095991
Transcriptomics	CACYBP	0.27047	-0.059289	-0.37662	-0.21169	-0.43761	0.029927	-0.27499	-0.1598	-0.38905	0.20949	-0.28402	0.14545	0.34935	0.22417	-0.27047	0.23333	-0.21287	-0.4681	-0.37549	-0.093168	-0.060888	0.19481	0.20497	-0.35968	-0.14963	-0.57086	0.022078	-0.045455	-0.55212	0.28289	-0.19819	-0.30209	-0.53247	-0.61378	-0.50085	-0.5223	-0.54263	-0.50423	-0.51101	-0.24337	-0.68041	-0.56635	-0.53924	-0.55167	-0.39356	-0.40486	-0.38227	-0.50762
Transcriptomics	RP11-65J3.14	-0.43083	0.16431	0.30435	-0.32078	0.055901	0.26821	-0.45342	-0.45455	0.1869	0.13725	0.40034	-0.3961	-0.53506	-0.66573	0.214	-0.36842	-0.11462	-0.078487	-0.15641	0.37662	0.20124	0.20045	0.17109	0.34274	0.13043	0.48617	0.43247	0.46234	0.46749	-0.61491	0.41502	0.034444	0.30774	0.43309	0.30209	0.39469	0.53698	0.35291	0.38792	0.23659	0.48391	0.36759	0.30999	0.22304	0.32016	0.36081	-0.066064	0.12479
Transcriptomics	OR2C1	-0.66008	0.49859	0.68154	-0.076623	0.39582	0.18238	-0.02428	-0.214	0.48391	-0.0072239	0.099944	-0.22468	-0.46104	-0.31903	0.45906	-0.52632	-0.049125	0.15754	-0.02428	0.32016	0.29205	-0.027668	-0.026539	0.12592	0.20723	0.58893	0.24545	0.42857	0.11662	-0.55618	0.45116	0.37324	0.49181	0.70186	0.39921	0.48955	0.37211	0.43535	0.26934	0.37324	0.63185	0.48278	0.45342	0.44777	0.5878	0.47713	0.27724	0.40824
Transcriptomics	PCNT	0.28741	-0.12592	-0.54828	0.11039	-0.27837	-0.029927	-0.019763	0.044608	-0.31112	0.12281	-0.16431	0.33766	0.65714	0.25918	-0.24111	0.34737	-0.36533	-0.49407	-0.17899	-0.084133	-0.079463	-0.07397	0.12253	-0.35743	0.097685	-0.69735	0.11818	-0.49481	-0.32301	0.3563	-0.38001	-0.015246	-0.49407	-0.54376	-0.62394	-0.64427	-0.45342	-0.55505	-0.37549	-0.53247	-0.607	-0.74139	-0.66798	-0.51214	-0.17674	-0.19029	-0.43986	-0.71316
Transcriptomics	CX3CL1	-0.35855	0.028797	0.55618	0.04026	0.16883	0.38227	-0.0028233	-0.11575	0.30774	-0.067079	0.12931	-0.23247	-0.43506	-0.23207	0.42857	-0.49474	0.43986	0.44212	0.29644	0.38905	0.34365	0.097685	0.16318	0.4568	-0.077357	0.66347	0.11688	0.47273	0.34985	-0.57538	0.33484	-0.046866	0.2061	0.47374	0.57425	0.66685	0.62733	0.53021	0.54715	0.32468	0.49633	0.56973	0.55957	0.43309	0.21513	0.29983	0.094297	0.47261
Transcriptomics	---	-0.30435	0.46358	0.27499	-0.27662	-0.078487	-0.018634	-0.34387	-0.55957	-0.022021	0.51084	0.51214	-0.52597	-0.54675	-0.58667	-0.020892	0.035088	-0.34726	-0.062676	-0.13382	0.20045	0.062951	0.36533	0.34613	0.345	0.32016	0.17448	0.37143	0.48182	0.019608	-0.42631	0.11575	-0.12931	-0.35743	0.060418	-0.12818	0.12931	0.25918	0.055901	0.14173	-0.45116	-0.16431	-0.29193	-0.36759	-0.30548	-0.26256	0.24449	-0.31903	-0.18916
Transcriptomics	ANAPC15	0.36307	-0.36533	-0.51892	-0.048052	-0.096556	-0.034444	0.034444	0.21852	-0.19819	0.11042	-0.29531	0.27532	0.63506	0.52795	-0.12027	0.18772	-0.11575	-0.18916	-0.11237	-0.031056	0.19092	-0.13156	-0.011858	-0.38001	-0.24224	-0.22304	-0.038961	-0.19091	-0.16202	0.49859	-0.058159	0.061547	-0.037832	-0.22417	-0.15867	-0.28628	-0.31338	-0.19142	-0.24337	0.035573	-0.14625	-0.15076	-0.11237	0.018634	0.034444	-0.32806	-0.017504	-0.15528
Transcriptomics	LINC00301	-0.08865	0.13495	0.4297	-0.18442	0.054771	0.060418	-0.39695	-0.21626	-0.061547	0.46543	0.15867	-0.3987	-0.3987	-0.063806	0.042349	-0.52632	0.47939	0.16093	-0.016375	0.096556	0.387	0.31903	0.55392	0.21513	-0.2716	0.45116	0.4987	0.44545	0.13519	-0.35291	0.22868	-0.1135	0.33145	0.27386	0.38114	0.3179	0.16093	0.39018	0.12705	0.50085	0.40937	0.59345	0.45567	0.48504	0.2908	-0.32242	0.062676	0.50649
Transcriptomics	SMIM12	0.18125	-0.18464	-0.39469	0.15065	-0.0028233	-0.032185	0.07397	0.092038	-0.13043	0.32301	-0.34274	0.33636	0.55584	0.31338	-0.08865	0.15614	-0.14512	-0.26934	-0.14286	-0.022021	0.129	-0.13608	0.11575	-0.40824	-0.41615	-0.33371	0.080519	-0.33636	0.050568	0.27047	-0.15641	0.19932	-0.010728	-0.20271	-0.11124	-0.24224	-0.22191	-0.17899	-0.15867	0.080745	-0.19142	-0.11462	-0.053642	-0.17787	-0.13495	-0.40937	0.17674	-0.097685
Transcriptomics	RTCA	0.34387	0.12479	-0.23772	0.31169	0.011858	-0.45116	0.34952	0.045737	-0.20723	0.24252	-0.22078	0.30649	0.41429	0.51101	-0.29757	0.46316	-0.22191	-0.046866	0.094297	-0.30548	-0.23426	-0.38679	0.053642	-0.15076	0.061547	-0.24337	-0.11818	-0.42987	-0.14964	0.47713	-0.40486	0.18803	-0.29644	-0.052513	-0.19142	-0.066064	-0.11575	-0.070582	-0.010728	-0.45567	-0.28063	-0.30774	-0.36985	-0.15754	-0.40373	-0.26482	-0.04009	-0.18351
Transcriptomics	CHMP4B	0.45455	-0.51101	-0.49181	0.13377	0.11688	-0.25692	0.32242	0.71542	0.061547	-0.30857	-0.17899	0.3039	0.51948	0.5144	-0.12592	0.45965	0.038961	0.26595	0.32919	-0.18916	-0.089783	-0.29644	-0.27837	-0.42518	-0.12253	-0.33032	-0.25844	-0.50909	-0.12074	0.53924	-0.23998	0.12705	-0.0084698	-0.4105	-0.21739	-0.37549	-0.38679	-0.24111	-0.18803	-0.044608	-0.13834	-0.1869	-0.010728	0.037832	-0.0095991	-0.37436	0.27273	-0.053642
Transcriptomics	RAP1B	0.47713	-0.25579	-0.4681	0.054545	-0.12479	-0.4105	0.19819	0.36194	-0.22981	-0.052632	-0.17109	0.26364	0.4026	0.34839	-0.15528	0.23684	-0.067194	0.042349	0.097685	-0.24788	-0.19092	-0.16093	-0.0095991	-0.40486	-0.0028233	-0.36646	-0.2039	-0.2974	-0.083591	0.57651	-0.16206	-0.12479	0.10107	-0.31451	-0.18464	-0.27273	-0.32806	-0.1598	-0.12479	-0.064935	-0.1485	-0.10559	-0.067194	0.053642	-0.28854	-0.43648	-0.027668	-0.11801
Transcriptomics	ESPN	-0.21287	0.32129	0.12931	-0.56494	-0.38227	-0.090909	-0.5336	-0.43083	-0.29757	-0.22394	0.22643	-0.59351	-0.71429	-0.5144	0.045737	-0.078947	-0.18577	0.019763	-0.13834	0.061547	-0.095975	0.29418	-0.04009	0.27724	0.32016	0.17222	-0.074026	0.45195	-0.10423	-0.066064	0.11688	-0.31564	0.044608	0.13721	-0.02428	0.1214	0.21626	0.25692	0.16093	-0.059289	0.17561	-0.012987	-0.092038	0.12705	0.00056465	0.14512	-0.22643	-0.07397
Transcriptomics	TNS1	-0.50649	0.12705	0.77527	-0.048052	0.19368	0.39018	0.12479	-0.016375	0.33371	-0.14138	0.16996	-0.25325	-0.46753	-0.37662	0.32129	-0.55965	0.32919	0.37324	0.16206	0.19819	0.30237	0.3642	0.059289	0.40599	0.036702	0.44551	-0.020779	0.51558	0.19298	-0.50423	0.52117	0.077357	0.32016	0.4681	0.40034	0.47826	0.33484	0.46923	0.29644	0.19932	0.42405	0.42857	0.39018	0.43196	0.28628	0.3371	0.13947	0.44438
Transcriptomics	FAM201A	-0.14399	0.44099	0.035573	-0.22987	-0.4026	0.14512	-0.38679	-0.48165	-0.21965	0.29618	0.25918	-0.34026	-0.23636	-0.3563	0.055901	0.040351	-0.32242	-0.4952	-0.35517	-0.001694	-0.093911	0.38114	0.33032	0.31903	0.3563	-0.15867	0.41818	0.19351	-0.038184	-0.14399	0.010728	-0.090909	-0.23772	0.018634	-0.20045	-0.054771	0.13721	-0.076228	0.032185	-0.36307	-0.21965	-0.38905	-0.48278	-0.29418	-0.027668	0.27047	-0.56409	-0.5415
Transcriptomics	NHEJ1 /// SLC23A3	0.10898	-0.018634	-0.17899	-0.35974	-0.52343	-0.13156	-0.34049	-0.38001	-0.35291	-0.1517	0.15302	0.088312	-0.054545	-0.32468	-0.38453	0.1807	-0.35743	-0.44438	-0.51327	-0.24449	-0.31682	0.40711	-0.20384	-0.17335	0.097685	-0.46584	-0.33117	0.13117	-0.2838	0.21739	0.059289	-0.49407	-0.37211	-0.45793	-0.5528	-0.36759	-0.38905	-0.39469	-0.36985	-0.35065	-0.40937	-0.48504	-0.50762	-0.43535	-0.46923	0.022021	-0.42631	-0.42405
Transcriptomics	TIA1	-0.086392	-0.02428	-0.21062	-0.22597	-0.47487	0.11124	-0.1677	-0.1406	-0.19932	-0.29412	-0.21626	0.37403	0.56494	-0.10672	-0.14512	0.23333	-0.60361	-0.55505	-0.40711	-0.020892	0.0092879	0.13495	-0.24449	-0.36533	0.22417	-0.57425	-0.2026	-0.11429	-0.49639	0.23094	0.18125	-0.13043	-0.17674	-0.38001	-0.44212	-0.34613	-0.2987	-0.41728	-0.23772	-0.2332	-0.29757	-0.51101	-0.35968	-0.28063	-0.07284	0.15415	-0.31677	-0.61491
Transcriptomics	ZNF835	-0.4952	0.19255	0.345	-0.071429	0.13834	0.1485	-0.12818	-0.40599	0.18012	-0.15789	0.12592	-0.041558	-0.40649	-0.58103	0.029927	-0.36491	0.0073405	0.0062112	-0.12931	0.13721	-0.17441	0.084133	-0.042349	0.41276	0.15528	0.30435	0.035065	0.26623	-0.001032	-0.4105	0.077357	-0.20497	-0.15641	0.17109	0.076228	0.16431	0.21852	0.093168	0.055901	-0.17787	0.0050819	0.060418	-0.038961	-0.13269	0.051383	0.55505	-0.19255	0.058159
Transcriptomics	LOC728353	-0.30548	0.607	0.49859	0.15065	-0.0050819	0.031056	-0.10559	-0.37211	0.071711	-0.048504	0.2061	-0.22468	-0.52857	-0.21626	0.13495	-0.20877	0.067194	-0.049125	-0.070582	-0.15754	-0.15789	0.18803	-0.094297	0.42067	0.21626	0.21062	-0.0090909	0.20519	0.083591	-0.30322	0.016375	-0.086392	0.25579	0.43196	0.24337	0.36194	0.29531	0.24562	0.19819	0.084133	0.23433	0.22417	0.087521	0.13382	0.15415	0.28967	0.023151	0.1406
Transcriptomics	UGT3A1	-0.36081	0.40937	0.47036	-0.49481	0.28176	0.21965	-0.31903	-0.38679	0.17448	0.47575	0.4681	-0.34935	-0.47662	-0.50762	0.28289	-0.34035	-0.001694	-0.081875	-0.34387	0.4218	0.45304	0.43196	0.5144	0.43874	-0.023151	0.4873	0.63377	0.57532	0.37049	-0.56861	0.46245	0.11575	0.24901	0.61829	0.39921	0.5223	0.45567	0.61829	0.36194	0.11237	0.43648	0.38114	0.2524	0.33145	0.28967	0.23885	0.0084698	0.26369
Transcriptomics	SHC1	0.15415	-0.13156	-0.26256	-0.014286	0.036702	-0.17561	-0.12818	0.020892	-0.12705	0.22394	-0.3642	0.046753	0.28961	0.42292	-0.15076	0.11754	-0.14173	0.093168	0.093168	-0.13043	0.13519	-0.47939	0.16996	-0.32016	-0.15076	0.14512	0.13506	-0.22468	-0.050568	0.30096	-0.068323	0.26934	0.068323	-0.066064	-0.012987	-0.059289	-0.055901	0.053642	-0.028797	0.20045	0.13269	0.1677	0.14173	0.20384	0.11011	-0.55618	0.15189	0.095426
Transcriptomics	LINC00673	-0.27837	0.26595	0.42744	0.018182	0.22417	0.22981	-0.16206	-0.36194	0.13156	0.20743	0.3913	-0.32208	-0.54156	-0.52456	-0.0028233	-0.25614	0.20271	0.053642	-0.0028233	0.22981	0.11868	0.2987	0.19255	0.71203	0.022021	0.3834	0.2013	0.3987	0.35397	-0.6533	0.081875	-0.2332	0.083004	0.38001	0.45567	0.4568	0.48278	0.345	0.31564	0.0028233	0.077357	0.30774	0.16206	-0.038961	-0.058159	0.26821	0.010728	0.22868
Transcriptomics	---	-0.32693	0.2908	0.37888	-0.081818	0.010728	0.1869	-0.027668	-0.14512	0.23207	-0.28173	0.26369	-0.20649	-0.51948	-0.48052	0.24675	-0.20702	0.12931	-0.081875	-0.18464	0.0084698	-0.26522	0.32468	-0.20158	0.36307	0.1869	0.15641	-0.037662	0.34545	0.054696	-0.35178	0.21287	-0.11914	0.17448	0.24675	0.19368	0.20045	0.1677	0.054771	0.035573	0.14963	0.12366	0.14512	0.10446	-0.043478	0.14625	0.60248	-0.022021	0.077357
Transcriptomics	PABPN1	0.27499	-0.46923	-0.35291	0.13377	-0.19593	-0.25692	0.11011	0.12818	-0.15528	-0.054696	-0.51892	0.33506	0.37662	0.4218	-0.3258	0.24035	-0.080745	0.020892	0.24675	0.047995	-0.060888	-0.40034	-0.26482	-0.43083	-0.15641	-0.28515	-0.37403	-0.43377	-0.093911	0.39243	-0.37211	0.10898	-0.23659	-0.16657	-0.27386	-0.24111	-0.22643	-0.15415	-0.062676	-0.21739	-0.15867	-0.30096	-0.2332	-0.081875	-0.24337	-0.27724	-0.038961	-0.19481
Transcriptomics	ZNF516	-0.1214	0.35855	0.35968	-0.34156	-0.11914	0.071711	-0.36307	-0.32129	-0.33371	0.44272	0.35743	-0.71818	-0.45065	-0.25353	0.015246	-0.11754	0.029927	0.19142	0.049125	0.062676	0.4324	0.32242	0.48165	0.50762	0.046866	0.43874	0.2987	0.47532	0.26109	-0.24111	0.30548	0.031056	0.25805	0.38679	0.39582	0.48052	0.52343	0.60023	0.44777	0.16996	0.39921	0.38792	0.2524	0.44212	0.079616	-0.26708	0.093168	0.30774
Transcriptomics	---	-0.12818	0.41615	0.23772	-0.08961	0.25466	0.080745	-0.049125	0.17448	0.084133	-0.15996	0.19029	-0.41688	-0.31818	0.060418	0.43083	-0.22105	0.12027	0.2603	0.16657	0.15641	0.24458	-0.21174	0.031056	0.025409	0.40937	0.37888	0.20779	0.16234	0.00516	-0.23772	0.12592	0.20836	0.41841	0.33936	0.23094	0.12592	0.13382	0.22417	0.060418	0.42744	0.46471	0.3642	0.36872	0.44551	0.63749	0.083004	0.17899	0.26256
Transcriptomics	PHLDA2	-0.2716	0.32016	0.43761	-0.083117	0.1598	0.23207	-0.32919	-0.33258	0.095426	0.1517	0.33484	-0.18961	-0.41688	-0.34839	0.22756	-0.40877	0.26482	0.075099	-0.0062112	0.30435	0.28999	0.0095991	0.43986	0.36307	0.12818	0.43422	0.54545	0.19351	0.26109	-0.6725	0.095426	-0.1022	0.0028233	0.26821	0.2603	0.36985	0.43874	0.31451	0.33258	0.17335	0.34952	0.37775	0.33258	0.22078	0.30774	0.17899	-0.15641	0.19593
Transcriptomics	KLRC4-KLRK1 /// KLRK1	0.48391	-0.11237	-0.50198	0.13506	-0.26821	-0.34274	0.28515	0.41954	-0.16657	-0.17853	-0.14399	0.37273	0.64545	0.50311	-0.16544	0.51404	-0.30435	-0.27386	-0.066064	-0.40034	-0.3581	-0.16996	-0.26708	-0.54489	0.30322	-0.6454	-0.20909	-0.45844	-0.39319	0.68041	-0.19255	0.018634	-0.12479	-0.48504	-0.51327	-0.55054	-0.58329	-0.59006	-0.42292	-0.24562	-0.37775	-0.53021	-0.41728	-0.21965	-0.13043	-0.096556	-0.21287	-0.50875
Transcriptomics	LIPT1	0.67137	-0.047995	-0.57764	-0.084416	-0.27612	-0.16206	-0.037832	0.097685	-0.5878	-0.017544	0.019763	0.1974	0.46623	0.34161	-0.49407	0.62105	-0.10898	-0.4026	-0.28967	-0.34613	-0.2549	-0.079616	0.12253	-0.053642	0.13382	-0.58329	-0.071429	-0.38052	-0.49432	0.44777	-0.42631	-0.37436	-0.60023	-0.64314	-0.42518	-0.50536	-0.45906	-0.48842	-0.45906	-0.40034	-0.72332	-0.51553	-0.54715	-0.53811	-0.45229	-0.35855	-0.38566	-0.51666
Transcriptomics	SAMSN1	0.19481	-0.1598	-0.16996	0.088312	0.070582	-0.18238	0.04009	0.10446	-0.04009	0.1517	-0.28854	0.24545	0.41818	0.58554	-0.21852	0.10702	-0.079616	-0.036702	-0.02428	-0.051383	0.18679	-0.23433	-0.093168	-0.56748	-0.22981	-0.13721	-0.064935	-0.20909	-0.29412	0.30661	-0.1406	0.19481	-0.17448	-0.18803	-0.31564	-0.31451	-0.4681	-0.25805	-0.38679	0.011858	-0.10333	-0.18803	-0.14399	-0.0039526	0.080745	-0.36194	0.12253	0.029927
Transcriptomics	TSPEAR	-0.57764	0.23094	0.50536	0.098701	0.1598	0.33823	0.031056	-0.099944	0.36081	-0.093911	-0.0095991	-0.28701	-0.24935	-0.2716	0.37098	-0.57018	0.049125	0.26934	0.17899	0.050254	0.1001	0.07397	-0.011858	0.36194	0.24562	0.57877	0.075325	0.48961	-0.011352	-0.35404	0.50649	0.038961	0.51779	0.38227	0.48842	0.40824	0.37662	0.23546	0.21626	0.38453	0.38001	0.50311	0.44099	0.36872	0.44212	0.39018	0.095426	0.31903
Transcriptomics	RABGAP1L	0.14512	-0.060418	-0.10559	0.071429	-0.12027	-0.10107	0.035573	0.10446	-0.054771	0.27761	-0.054771	0.1	0.33247	0.23885	-0.14737	0.24912	-0.25127	-0.14286	-0.018634	0.025409	0.17234	0.07284	0.10446	-0.62394	-0.13382	-0.48617	0.075325	-0.19481	-0.10423	0.08978	-0.070582	0.21513	-0.30435	-0.41389	-0.49972	-0.41728	-0.44551	-0.40824	-0.30322	-0.17674	-0.31564	-0.48617	-0.31903	-0.31338	-0.23546	-0.39582	0.04009	-0.2332
[truncated: 181 more columns]

## Sheet: S8 - Component 1 P-value Matrix
Table S8. P-values for correlations between variables presented in Figure 5A (Component 1).
	Block	Metabolomics	Metabolomics	Metabolomics	Metabolomics	Metabolomics	Metabolomics	Metabolomics	Metabolomics	Metabolomics	Metabolomics	Metabolomics	Metabolomics	Metabolomics	Metabolomics	Metabolomics	Metabolomics	Metabolomics	Metabolomics	Metabolomics	Metabolomics	Metabolomics	Metabolomics	Metabolomics	Metabolomics	Metabolomics	Metabolomics	Metabolomics	Metabolomics	Metabolomics	Metabolomics	Metabolomics	Sphingolipids	Sphingolipids	Sphingolipids	Sphingolipids	Sphingolipids	Sphingolipids	Sphingolipids	Sphingolipids	Sphingolipids	Sphingolipids	Sphingolipids	Sphingolipids	Sphingolipids	Sphingolipids	Sphingolipids	Fatty Acids	Fatty Acids
Block	Variable	Methylhistidine	Gln	Arg	LEA	OEA	S1P(d18:1)	Arachidonic acid	DHA	LPC(C16:0)	Paraxanthine	Cit	Cortisol	Cortisone	Pipecolate	Asp-Phe	NAC	Carnitine(C8:0)	Oleic acid	Linoleic acid	Taurodeoxycholate	Leu-Leu	Urate	Theobromine	MTA	PAF(C4:0)	22-OH-cholesterol	Methylxanthine	ADMA	N-Palmitoyltaurine	DHEA-S	Taurine	S1P(d18:1)	Cer(C14:0)	Cer(C16:0)	Cer(C18:0)	Cer(C20:0)	Cer(C22:0)	Cer(C24:1)	Cer(C24:0)	SM(C12:0)	SM(C16:0)	SM(C18:1)	SM(C18:0)	SM(C24:1)	LacCer(C16:0)	DhCer(C16:0)	Myristoic acid	Palmitoleic acid
Metabolomics	Methylhistidine	1	0.42666	0.0026073	0.59417	0.23063	0.049772	0.79726	0.1334	0.0087374	0.89972	0.46948	0.90658	0.38788	0.0016417	0.10769	0.0021205	0.19771	0.58565	0.74326	0.074486	0.11898	0.23888	0.60321	0.53435	0.79337	0.043548	1	0.0063583	0.95139	0.013789	0.0013174	0.43264	0.08586	0.055239	0.14047	0.090971	0.15698	0.17994	0.36392	0.4119	0.14337	0.20141	0.14931	0.4119	0.12526	0.016018	0.23063	0.19955
Metabolomics	Gln	0.42666	1	0.070964	0.7202	1	0.39744	0.43867	0.026852	0.42666	0.28361	0.044741	0.12208	0.16714	0.65719	0.76628	0.73718	0.10533	0.44474	0.20704	0.46012	0.83569	0.38326	0.34517	0.2368	0.026454	0.59616	0.31056	0.18442	0.24309	0.4885	0.75091	0.77399	0.97992	0.19955	0.93981	0.24733	0.4478	0.48212	0.72425	0.4119	0.82071	0.81679	0.42368	0.88391	0.9358	0.59265	0.70915	0.88391
Metabolomics	Arg	0.0026073	0.070964	1	0.78836	0.1065	0.29248	0.79726	0.31192	0.071832	0.56454	0.2648	0.42025	0.09	0.15543	0.53771	0.021637	0.51446	0.094146	0.52105	0.47263	0.055216	0.18868	0.44474	0.13903	0.99598	0.015756	0.54049	0.038439	0.67464	0.0011618	0.012451	0.38326	0.20327	0.014502	0.066743	0.0033159	0.082901	0.020065	0.11008	0.45703	0.024534	0.030216	0.044741	0.036397	0.23063	0.43264	0.14337	0.0068577
Metabolomics	LEA	0.59417	0.7202	0.78836	1	0.066503	0.3218	0.0010707	0.094858	0.15449	0.76017	0.96435	0.060376	0.10235	0.027944	0.65403	0.93845	0.18048	0.077588	0.0020943	0.1148	0.4565	0.18442	0.52928	0.92876	0.67036	0.83614	0.49797	0.029921	0.37169	0.75833	0.067458	0.797	0.91545	0.63784	0.67447	0.91988	0.92876	0.40389	0.78836	0.53674	0.59417	0.83614	0.71181	0.85805	0.52928	0.61784	0.21585	0.28615
Metabolomics	OEA	0.23063	1	0.1065	0.066503	1	0.55461	0.0079694	0.13064	0.0030416	0.5479	0.27842	0.48558	0.82305	0.71292	0.52105	0.38697	0.31192	0.014993	0.21278	0.47894	0.53148	0.23888	0.79726	0.27156	0.49493	0.010645	0.53674	0.91988	0.091318	0.042962	0.33472	0.11749	0.29011	0.13479	0.023798	0.11129	0.2854	0.19588	0.52768	0.48531	0.30454	0.014993	0.018533	0.4478	0.39173	0.51446	0.0024378	0.00092026
Metabolomics	S1P(d18:1)	0.049772	0.39744	0.29248	0.3218	0.55461	1	0.9158	0.93981	0.072709	0.45295	0.71292	0.9599	0.90658	0.18166	0.030216	0.30724	0.99197	0.41483	0.33731	0.028917	0.11898	0.32956	0.80116	0.45394	0.43565	0.49816	0.4269	0.16163	0.20331	0.0079694	0.0057644	0.13619	0.621	0.32701	0.26929	0.4119	0.24308	0.45703	0.63899	0.19046	0.58565	0.47894	0.27383	0.87199	0.083878	0.18691	0.75475	0.83248
Metabolomics	Arachidonic acid	0.79726	0.43867	0.79726	0.0010707	0.0079694	0.9158	1	0.00057734	0.029778	0.3808	0.80506	0.07866	0.16345	0.2854	0.38326	0.47702	0.33213	0.032485	0.03202	0.36665	0.22596	0.23063	0.27842	0.69043	0.82463	0.99197	0.1442	0.19867	0.30735	0.51446	0.90382	0.10769	0.51117	0.65354	0.2452	0.51446	0.78949	0.87199	0.58216	0.61742	0.74709	0.63177	0.45703	0.94381	0.39173	0.41777	0.034396	0.20327
Metabolomics	DHA	0.1334	0.026852	0.31192	0.094858	0.13064	0.93981	0.00057734	1	0.10075	0.21606	0.57869	0.35095	0.12508	0.051097	0.21471	0.33636	0.096309	0.055954	0.017948	0.78561	0.57014	0.2286	0.27842	0.18166	0.57176	0.35581	0.47142	0.052572	0.3627	0.29487	0.6979	0.069252	0.2368	0.49493	0.67559	0.42666	0.37768	0.58565	0.86803	0.26929	0.86406	0.73564	0.19046	0.60321	0.56831	0.57176	0.028494	0.47263
Metabolomics	LPC(C16:0)	0.0087374	0.42666	0.071832	0.15449	0.0030416	0.072709	0.029778	0.10075	1	0.68666	0.56487	0.33039	0.90216	0.41483	0.011026	0.22348	0.50139	0.16013	0.33992	0.21278	0.81033	0.62817	0.29487	0.9158	0.18515	0.17652	0.82305	0.41366	0.13249	0.058886	0.05383	0.078141	0.038489	0.12928	0.044142	0.15698	0.45394	0.52105	0.47894	0.15698	0.30454	0.13479	0.033429	0.66453	0.17148	0.032485	0.012238	0.09202
Metabolomics	Paraxanthine	0.89972	0.28361	0.56454	0.76017	0.5479	0.45295	0.3808	0.21606	0.68666	1	0.034384	0.036568	0.63938	0.9773	0.48884	0.74205	0.87401	0.93198	0.95139	0.98379	0.30194	0.22596	2.9205e-09	0.4041	0.76639	0.28361	2.3779e-05	0.15846	0.29567	0.33223	0.96434	0.61573	0.46816	0.76017	0.82299	0.62153	0.43306	0.61573	0.62153	0.44294	0.82933	0.89328	0.57014	0.88685	0.58706	0.09681	0.58706	0.62735
Metabolomics	Cit	0.46948	0.044741	0.2648	0.96435	0.27842	0.71292	0.80506	0.57869	0.56487	0.034384	1	0.036605	0.19659	0.35313	0.61742	0.57149	0.79726	0.76628	0.86406	0.80506	0.29139	0.18868	0.057405	0.095223	0.11008	0.42072	0.040997	0.33328	0.11054	0.12003	0.51446	1	0.68671	0.63177	0.87993	0.52768	0.38046	0.56831	0.57176	0.23268	0.67559	1	0.66821	0.79726	0.93981	0.87993	0.75091	0.63538
Metabolomics	Cortisol	0.90658	0.12208	0.42025	0.060376	0.48558	0.9599	0.07866	0.35095	0.33039	0.036568	0.036605	1	0.00050707	0.2757	0.6581	0.95452	0.64188	0.44716	0.65403	0.78836	0.56683	0.33039	0.13924	0.3218	0.136	0.10784	0.15824	0.023538	0.42231	0.30503	0.30229	0.43697	0.73707	0.48202	0.85805	0.77545	0.37534	0.47494	0.69929	0.58636	0.45059	0.83614	0.81869	0.64188	0.77116	0.43697	0.86244	0.6581
Metabolomics	Cortisone	0.38788	0.16714	0.09	0.10235	0.82305	0.90658	0.16345	0.12508	0.90216	0.63938	0.19659	0.00050707	1	0.028928	0.33328	0.31797	0.38158	0.36608	0.9688	0.54425	0.5928	0.27829	0.68684	0.17853	0.75833	0.043	0.83541	0.0076733	0.21259	0.076527	0.53301	0.8274	0.5594	0.091197	0.33619	0.16163	0.21806	0.11059	0.41366	0.32465	0.22706	0.23166	0.54425	0.66626	0.69929	0.65403	0.89773	0.18842
Metabolomics	Pipecolate	0.0016417	0.65719	0.15543	0.027944	0.71292	0.18166	0.2854	0.051097	0.41483	0.9773	0.35313	0.2757	0.028928	1	0.56831	0.10608	0.19406	0.6979	0.14931	0.084865	0.87401	0.073593	0.84825	0.12659	0.86406	0.21085	0.80566	0.0042409	0.42329	0.015499	0.010834	0.74709	0.51117	0.25379	0.32701	0.2452	0.11749	0.23063	0.39173	0.9759	0.58216	0.47578	0.59265	0.65354	0.76243	0.024534	0.9759	0.69416
Metabolomics	Asp-Phe	0.10769	0.76628	0.53771	0.65403	0.52105	0.030216	0.38326	0.21471	0.011026	0.48884	0.61742	0.6581	0.33328	0.56831	1	0.28643	0.46948	0.75858	0.89984	0.012884	0.33649	0.37768	0.95985	0.92779	0.56487	0.38607	0.36303	0.12968	0.11683	0.2286	0.11008	0.11623	0.021363	0.023798	0.05383	0.12659	0.11374	0.11498	0.098508	0.040121	0.055239	0.2368	0.056676	0.21085	0.048475	0.026852	0.34254	0.64625
Metabolomics	NAC	0.0021205	0.73718	0.021637	0.93845	0.38697	0.30724	0.47702	0.33636	0.22348	0.74205	0.57149	0.95452	0.31797	0.10608	0.28643	1	0.26651	0.32525	0.73178	0.19836	0.14349	0.39512	0.46802	0.98863	0.46355	0.0096654	0.53693	0.011107	0.68027	0.067488	0.027337	0.5913	0.10783	0.1827	0.20377	0.29672	0.60635	0.28984	0.77528	0.12256	0.051663	0.016919	0.044896	0.029258	0.072612	0.25059	0.90918	0.037218
Metabolomics	Carnitine(C8:0)	0.19771	0.10533	0.51446	0.18048	0.31192	0.99197	0.33213	0.096309	0.50139	0.87401	0.79726	0.64188	0.38158	0.19406	0.46948	0.26651	1	0.05383	0.086865	0.59968	0.76017	0.8601	0.36939	0.46323	0.0097391	0.27842	0.68684	0.58636	0.17364	0.41777	0.23063	0.56487	0.69416	0.58914	0.041807	0.19406	0.52105	0.24098	0.32193	0.047204	0.2854	0.013106	0.011419	0.17483	0.9198	0.49816	0.31192	0.0087374
Metabolomics	Oleic acid	0.58565	0.44474	0.094146	0.077588	0.014993	0.41483	0.032485	0.055954	0.16013	0.93198	0.76628	0.44716	0.36608	0.6979	0.75858	0.32525	0.05383	1	1.0429e-06	0.94782	0.69269	0.20141	0.87199	0.49816	0.73945	0.010458	0.50357	0.8274	0.26103	0.56144	0.89585	0.43565	0.32701	0.49493	0.095223	0.14192	0.2368	0.1065	0.13761	0.59616	0.13201	0.030216	0.02308	0.041807	1	0.32193	0.014746	0.00024463
Metabolomics	Linoleic acid	0.74326	0.20704	0.52105	0.0020943	0.21278	0.33731	0.03202	0.017948	0.33992	0.95139	0.86406	0.65403	0.9688	0.14931	0.89984	0.73178	0.086865	1.0429e-06	1	0.98393	0.59275	0.06511	0.90382	0.95183	0.95584	0.29248	0.53301	0.18244	0.19713	0.91181	0.23888	0.27842	0.49816	0.84825	0.37214	0.49816	0.3021	0.4885	0.0889	1	0.30454	0.37214	0.17994	0.12659	0.97992	0.21666	0.10533	0.079076
Metabolomics	Taurodeoxycholate	0.074486	0.46012	0.47263	0.1148	0.47894	0.028917	0.36665	0.78561	0.21278	0.98379	0.80506	0.78836	0.54425	0.084865	0.012884	0.19836	0.59968	0.94782	0.98393	1	0.0025683	0.7054	0.46012	0.9358	0.35581	0.20515	0.12208	0.22479	0.10254	0.0023834	0.28073	0.34517	0.51446	0.032954	0.12132	0.15235	0.046578	0.056676	0.05383	0.21862	0.057405	0.34781	0.098508	0.31192	0.074486	0.071832	0.76628	0.67189
Metabolomics	Leu-Leu	0.11898	0.83569	0.055216	0.4565	0.53148	0.11898	0.22596	0.57014	0.81033	0.30194	0.29139	0.56683	0.5928	0.87401	0.33649	0.14349	0.76017	0.69269	0.59275	0.0025683	1	0.41845	0.065782	0.90616	0.60419	0.19107	0.022461	0.3842	0.37595	0.0069503	0.15211	0.22596	0.39938	0.1085	0.328	0.20331	0.1085	0.050438	0.076201	0.37623	0.0085367	0.28361	0.086056	0.012978	0.0069503	0.65083	0.46816	0.2993
Metabolomics	Urate	0.23888	0.38326	0.18868	0.18442	0.23888	0.32956	0.23063	0.2286	0.62817	0.22596	0.18868	0.33039	0.27829	0.073593	0.37768	0.39512	0.8601	0.20141	0.06511	0.7054	0.41845	1	0.38046	0.36665	0.26258	0.52105	0.37224	0.0031306	0.99676	0.43565	0.058886	0.22059	0.63899	0.84825	0.82071	0.54782	1	0.77399	0.9318	0.9158	0.70165	0.58565	0.60675	0.76628	0.683	0.39173	0.64625	0.73945
Metabolomics	Theobromine	0.60321	0.34517	0.44474	0.52928	0.79726	0.80116	0.27842	0.27842	0.29487	2.9205e-09	0.057405	0.13924	0.68684	0.84825	0.95985	0.46802	0.36939	0.87199	0.90382	0.46012	0.065782	0.38046	1	0.15235	0.73945	0.20894	3.7339e-06	0.35998	0.26471	0.15855	0.75475	0.92379	0.27156	0.76628	0.57176	0.28775	0.16983	0.17994	0.23063	0.62817	0.77786	0.51775	0.88391	0.54107	0.83248	0.14781	0.21862	0.64625
Metabolomics	MTA	0.53435	0.2368	0.13903	0.92876	0.27156	0.45394	0.69043	0.18166	0.9158	0.4041	0.095223	0.3218	0.17853	0.12659	0.92779	0.98863	0.46323	0.49816	0.95183	0.9358	0.90616	0.36665	0.15235	1	0.99197	0.015244	0.49633	0.14757	0.22596	0.1334	0.57869	0.46323	0.89187	0.03202	0.0022776	0.00032699	0.00021396	0.0062308	0.0093951	0.36939	0.77013	0.10302	0.51446	0.75091	0.30698	0.19588	0.9759	0.24733
Metabolomics	PAF(C4:0)	0.79337	0.026454	0.99598	0.67036	0.49493	0.43565	0.82463	0.57176	0.18515	0.76639	0.11008	0.136	0.75833	0.86406	0.56487	0.46355	0.0097391	0.73945	0.95584	0.35581	0.60419	0.26258	0.73945	0.99197	1	0.90382	0.9421	0.89331	0.30735	0.64625	0.80116	0.87199	0.73564	0.93981	0.089931	0.33731	0.73184	0.39458	0.52768	0.078141	0.8443	0.14337	0.060397	0.97189	0.60321	0.52436	0.044741	0.068408
Metabolomics	22-OH-cholesterol	0.043548	0.59616	0.015756	0.83614	0.010645	0.49816	0.99197	0.35581	0.17652	0.28361	0.42072	0.10784	0.043	0.21085	0.38607	0.0096654	0.27842	0.010458	0.29248	0.20515	0.19107	0.52105	0.20894	0.015244	0.90382	1	0.22479	0.0074528	0.14703	0.021363	0.061164	0.48212	0.14484	0.0023834	0.0010486	0.0010486	0.0033159	0.001849	0.05383	0.14484	0.0062308	6.3597e-05	0.0046294	0.014502	0.16013	0.39458	0.23063	0.00024463
Metabolomics	Methylxanthine	1	0.31056	0.54049	0.49797	0.53674	0.4269	0.1442	0.47142	0.82305	2.3779e-05	0.040997	0.15824	0.83541	0.80566	0.36303	0.53693	0.68684	0.50357	0.53301	0.12208	0.022461	0.37224	3.7339e-06	0.49633	0.9421	0.22479	1	0.44646	0.15995	0.044377	0.43359	0.25063	0.91988	0.345	0.53674	0.45402	0.21365	0.345	0.33039	0.66626	0.30503	0.49633	0.60202	0.39424	0.12508	0.80133	0.41366	0.95099
Metabolomics	ADMA	0.0063583	0.18442	0.038439	0.029921	0.91988	0.16163	0.19867	0.052572	0.41366	0.15846	0.33328	0.023538	0.0076733	0.0042409	0.12968	0.011107	0.58636	0.8274	0.18244	0.22479	0.3842	0.0031306	0.35998	0.14757	0.89331	0.0074528	0.44646	1	0.86761	0.084188	0.00070902	0.46442	0.30229	0.091197	0.15449	0.088814	0.27056	0.16529	0.7626	0.42025	0.40389	0.22706	0.56705	0.51819	0.65403	0.1025	0.67447	0.26549
Metabolomics	N-Palmitoyltaurine	0.95139	0.24309	0.67464	0.37169	0.091318	0.20331	0.30735	0.3627	0.13249	0.29567	0.11054	0.42231	0.21259	0.42329	0.11683	0.68027	0.17364	0.26103	0.19713	0.10254	0.37595	0.99676	0.26471	0.22596	0.30735	0.14703	0.15995	0.86761	1	0.057729	0.52067	0.020783	0.13484	0.031873	0.028006	0.050438	0.0030303	0.020207	0.0027915	0.30735	0.027279	0.055216	0.040833	0.28748	0.75396	0.93845	0.12561	0.09681
Metabolomics	DHEA-S	0.013789	0.4885	0.0011618	0.75833	0.042962	0.0079694	0.51446	0.29487	0.058886	0.33223	0.12003	0.30503	0.076527	0.015499	0.2286	0.067488	0.41777	0.56144	0.91181	0.0023834	0.0069503	0.43565	0.15855	0.1334	0.64625	0.021363	0.044377	0.084188	0.057729	1	0.060397	0.33472	0.58914	0.039571	0.054531	0.026061	0.021032	0.070104	0.10417	0.22457	0.083878	0.05383	0.036397	0.51446	0.15543	0.25816	0.31941	0.087878
Metabolomics	Taurine	0.0013174	0.75091	0.012451	0.067458	0.33472	0.0057644	0.90382	0.6979	0.05383	0.96434	0.51446	0.30229	0.53301	0.010834	0.11008	0.027337	0.23063	0.89585	0.23888	0.28073	0.15211	0.058886	0.75475	0.57869	0.80116	0.061164	0.43359	0.00070902	0.52067	0.060397	1	0.13064	0.025288	0.084865	0.18691	0.15235	0.33731	0.14781	0.66453	0.14781	0.063509	0.098508	0.099622	0.13903	0.055954	0.13619	0.38046	0.25379
Sphingolipids	S1P(d18:1)	0.43264	0.77399	0.38326	0.797	0.11749	0.13619	0.10769	0.069252	0.078141	0.61573	1	0.43697	0.8274	0.74709	0.11623	0.5913	0.56487	0.43565	0.27842	0.34517	0.22596	0.22059	0.92379	0.46323	0.87199	0.48212	0.25063	0.46442	0.020783	0.33472	0.13064	1	0.16655	0.072709	0.53435	0.51775	0.2854	0.24098	0.26704	0.33213	0.04912	0.52768	0.24308	0.24947	0.05245	0.97189	0.035385	0.55461
Sphingolipids	Cer(C14:0)	0.08586	0.97992	0.20327	0.91545	0.29011	0.621	0.51117	0.2368	0.038489	0.46816	0.68671	0.73707	0.5594	0.51117	0.021363	0.10783	0.69416	0.32701	0.49816	0.51446	0.39938	0.63899	0.27156	0.89187	0.73564	0.14484	0.91988	0.30229	0.13484	0.58914	0.025288	0.16655	1	0.0071227	0.0078228	0.082901	0.22658	0.062719	0.15543	0.00080531	0.00043101	0.0019379	0.000594	0.0015269	0.0084232	0.33731	0.014746	0.037431
Sphingolipids	Cer(C16:0)	0.055239	0.19955	0.014502	0.63784	0.13479	0.32701	0.65354	0.49493	0.12928	0.76017	0.63177	0.48202	0.091197	0.25379	0.023798	0.1827	0.58914	0.49493	0.84825	0.032954	0.1085	0.84825	0.76628	0.03202	0.93981	0.0023834	0.345	0.091197	0.031873	0.039571	0.084865	0.072709	0.0071227	1	0.00023664	2.0914e-06	7.5251e-05	8.8402e-07	0.0003703	0.18691	8.1685e-05	0.0032454	0.012666	0.0029117	0.066743	0.028076	0.18868	0.045347
Sphingolipids	Cer(C18:0)	0.14047	0.93981	0.066743	0.67447	0.023798	0.26929	0.2452	0.67559	0.044142	0.82299	0.87993	0.85805	0.33619	0.32701	0.05383	0.20377	0.041807	0.095223	0.37214	0.12132	0.328	0.82071	0.57176	0.0022776	0.089931	0.0010486	0.53674	0.15449	0.028006	0.054531	0.18691	0.53435	0.0078228	0.00023664	1	1.5513e-06	7.5251e-05	8.5063e-05	0.00080531	0.022037	0.013106	2.2648e-06	2.8893e-05	0.029778	0.45394	0.15855	0.011823	0.0011618
Sphingolipids	Cer(C20:0)	0.090971	0.24733	0.0033159	0.91988	0.11129	0.4119	0.51446	0.42666	0.15698	0.62153	0.52768	0.77545	0.16163	0.2452	0.12659	0.29672	0.19406	0.14192	0.49816	0.15235	0.20331	0.54782	0.28775	0.00032699	0.33731	0.0010486	0.45402	0.088814	0.050438	0.026061	0.15235	0.51775	0.082901	2.0914e-06	1.5513e-06	1	2.7295e-06	3.1428e-06	8.8402e-07	0.35313	0.0042661	0.00057734	0.0032454	0.011419	0.68671	0.15235	0.10417	0.0075362
Sphingolipids	Cer(C22:0)	0.15698	0.4478	0.082901	0.92876	0.2854	0.24308	0.78949	0.37768	0.45394	0.43306	0.38046	0.37534	0.21806	0.11749	0.11374	0.60635	0.52105	0.2368	0.3021	0.046578	0.1085	1	0.16983	0.00021396	0.73184	0.0033159	0.21365	0.27056	0.0030303	0.021032	0.33731	0.2854	0.22658	7.5251e-05	7.5251e-05	2.7295e-06	1	8.7428e-07	4.0984e-06	0.70915	0.0088982	0.012029	0.025672	0.051097	0.70915	0.16818	0.33731	0.12262
Sphingolipids	Cer(C24:1)	0.17994	0.48212	0.020065	0.40389	0.19588	0.45703	0.87199	0.58565	0.52105	0.61573	0.56831	0.47494	0.11059	0.23063	0.11498	0.28984	0.24098	0.1065	0.4885	0.056676	0.050438	0.77399	0.17994	0.0062308	0.39458	0.001849	0.345	0.16529	0.020207	0.070104	0.14781	0.24098	0.062719	8.8402e-07	8.5063e-05	3.1428e-06	8.7428e-07	1	8.9613e-07	0.32446	0.00019985	0.00080531	0.0036106	0.00066471	0.37768	0.49171	0.13619	0.010458
Sphingolipids	Cer(C24:0)	0.36392	0.72425	0.11008	0.78836	0.52768	0.63899	0.58216	0.86803	0.47894	0.62153	0.57176	0.69929	0.41366	0.39173	0.098508	0.77528	0.32193	0.13761	0.0889	0.05383	0.076201	0.9318	0.23063	0.0093951	0.52768	0.05383	0.33039	0.7626	0.0027915	0.10417	0.66453	0.26704	0.15543	0.0003703	0.00080531	8.8402e-07	4.0984e-06	8.9613e-07	1	0.82855	0.0033159	0.033429	0.023437	0.0099149	0.75475	0.3889	0.27612	0.16331
Sphingolipids	SM(C12:0)	0.4119	0.4119	0.45703	0.53674	0.48531	0.19046	0.61742	0.26929	0.15698	0.44294	0.23268	0.58636	0.32465	0.9759	0.040121	0.12256	0.047204	0.59616	1	0.21862	0.37623	0.9158	0.62817	0.36939	0.078141	0.14484	0.66626	0.42025	0.30735	0.22457	0.14781	0.33213	0.00080531	0.18691	0.022037	0.35313	0.70915	0.32446	0.82855	1	0.0068577	0.00047123	1.8917e-05	0.041807	0.0082696	0.95985	0.020065	0.018239
Sphingolipids	SM(C16:0)	0.14337	0.82071	0.024534	0.59417	0.30454	0.58565	0.74709	0.86406	0.30454	0.82933	0.67559	0.45059	0.22706	0.58216	0.055239	0.051663	0.2854	0.13201	0.30454	0.057405	0.0085367	0.70165	0.77786	0.77013	0.8443	0.0062308	0.30503	0.40389	0.027279	0.083878	0.063509	0.04912	0.00043101	8.1685e-05	0.013106	0.0042661	0.0088982	0.00019985	0.0033159	0.0068577	1	0.00025283	8.1685e-05	3.6602e-06	0.00078383	0.56487	0.090971	0.0087374
Sphingolipids	SM(C18:1)	0.20141	0.81679	0.030216	0.83614	0.014993	0.47894	0.63177	0.73564	0.13479	0.89328	1	0.83614	0.23166	0.47578	0.2368	0.016919	0.013106	0.030216	0.37214	0.34781	0.28361	0.58565	0.51775	0.10302	0.14337	6.3597e-05	0.49633	0.22706	0.055216	0.05383	0.098508	0.52768	0.0019379	0.0032454	2.2648e-06	0.00057734	0.012029	0.00080531	0.033429	0.00047123	0.00025283	1	4.0547e-06	0.00084976	0.089931	0.81287	0.013331	8.7376e-07
Sphingolipids	SM(C18:0)	0.14931	0.42368	0.044741	0.71181	0.018533	0.27383	0.45703	0.19046	0.033429	0.57014	0.66821	0.81869	0.54425	0.59265	0.056676	0.044896	0.011419	0.02308	0.17994	0.098508	0.086056	0.60675	0.88391	0.51446	0.060397	0.0046294	0.60202	0.56705	0.040833	0.036397	0.099622	0.24308	0.000594	0.012666	2.8893e-05	0.0032454	0.025672	0.0036106	0.023437	1.8917e-05	8.1685e-05	4.0547e-06	1	0.00074229	0.028076	0.77399	0.00099558	1.6906e-05
Sphingolipids	SM(C24:1)	0.4119	0.88391	0.036397	0.85805	0.4478	0.87199	0.94381	0.60321	0.66453	0.88685	0.79726	0.64188	0.66626	0.65354	0.21085	0.029258	0.17483	0.041807	0.12659	0.31192	0.012978	0.76628	0.54107	0.75091	0.97189	0.014502	0.39424	0.51819	0.28748	0.51446	0.13903	0.24947	0.0015269	0.0029117	0.029778	0.011419	0.051097	0.00066471	0.0099149	0.041807	3.6602e-06	0.00084976	0.00074229	1	0.0026659	0.8601	0.21471	0.0082696
Sphingolipids	LacCer(C16:0)	0.12526	0.9358	0.23063	0.52928	0.39173	0.083878	0.39173	0.56831	0.17148	0.58706	0.93981	0.77116	0.69929	0.76243	0.048475	0.072612	0.9198	1	0.97992	0.074486	0.0069503	0.683	0.83248	0.30698	0.60321	0.16013	0.12508	0.65403	0.75396	0.15543	0.055954	0.05245	0.0084232	0.066743	0.45394	0.68671	0.70915	0.37768	0.75475	0.0082696	0.00078383	0.089931	0.028076	0.0026659	1	0.39458	0.47578	0.42964
Sphingolipids	DhCer(C16:0)	0.016018	0.59265	0.43264	0.61784	0.51446	0.18691	0.41777	0.57176	0.032485	0.09681	0.87993	0.43697	0.65403	0.024534	0.026852	0.25059	0.49816	0.32193	0.21666	0.071832	0.65083	0.39173	0.14781	0.19588	0.52436	0.39458	0.80133	0.1025	0.93845	0.25816	0.13619	0.97189	0.33731	0.028076	0.15855	0.15235	0.16818	0.49171	0.3889	0.95985	0.56487	0.81287	0.77399	0.8601	0.39458	1	0.73184	0.71292
Fatty Acids	Myristoic acid	0.23063	0.70915	0.14337	0.21585	0.0024378	0.75475	0.034396	0.028494	0.012238	0.58706	0.75091	0.86244	0.89773	0.9759	0.34254	0.90918	0.31192	0.014746	0.10533	0.76628	0.46816	0.64625	0.21862	0.9759	0.044741	0.23063	0.41366	0.67447	0.12561	0.31941	0.38046	0.035385	0.014746	0.18868	0.011823	0.10417	0.33731	0.13619	0.27612	0.020065	0.090971	0.013331	0.00099558	0.21471	0.47578	0.73184	1	0.00052967
Fatty Acids	Palmitoleic acid	0.19955	0.88391	0.0068577	0.28615	0.00092026	0.83248	0.20327	0.47263	0.09202	0.62735	0.63538	0.6581	0.18842	0.69416	0.64625	0.037218	0.0087374	0.00024463	0.079076	0.67189	0.2993	0.73945	0.64625	0.24733	0.068408	0.00024463	0.95099	0.26549	0.09681	0.087878	0.25379	0.55461	0.037431	0.045347	0.0011618	0.0075362	0.12262	0.010458	0.16331	0.018239	0.0087374	8.7376e-07	1.6906e-05	0.0082696	0.42964	0.71292	0.00052967	1
Fatty Acids	Eicosadienoic acid	0.12793	0.97992	0.029778	0.86684	0.0069892	0.5079	0.52436	0.57522	0.05383	0.82299	0.81287	0.8274	0.83177	0.80506	0.64989	0.30724	0.54782	0.16655	0.6979	0.48212	0.12787	0.45703	0.96386	0.48531	0.33731	0.0027257	0.48558	0.41695	0.18808	0.1334	0.021363	0.026852	0.0027866	0.0046294	0.0011916	0.0088982	0.1065	0.012238	0.19771	0.0040095	0.001893	4.0631e-05	0.00012082	0.0062308	0.03202	0.88391	0.0010486	0.00062853
Fatty Acids	Dihomo-gamma-linolenic acid	0.12394	0.76243	0.031561	0.79268	0.014024	0.63177	0.61742	0.85219	0.070964	0.3451	0.99197	0.9599	0.62981	0.82071	0.30944	0.24439	0.19771	0.17652	0.59968	0.11374	0.028006	0.92379	0.69043	0.10533	0.042381	0.00092026	0.37845	0.19659	0.086056	0.072709	0.16331	0.19226	0.013789	0.00014019	7.0381e-06	5.5839e-05	0.0053275	0.00052967	0.012451	0.023437	0.0022776	9.2156e-05	0.00031685	0.0079694	0.15543	0.49816	0.0026659	0.00022887
Fatty Acids	Arachidonic acid	0.4417	0.95584	0.25597	0.26802	0.0035349	0.80896	0.084865	0.71669	0.12526	0.88685	0.92379	0.94654	0.33911	0.9198	0.34517	0.35922	0.19046	0.024164	0.17652	0.63899	0.89972	0.070964	0.71292	0.11749	0.43264	0.00012082	0.91545	0.72441	0.010071	0.42666	0.6103	0.12003	0.043548	0.00062853	0.00078383	0.0019836	0.0079694	0.0042661	0.03202	0.11875	0.0052227	0.00021396	0.0033876	0.026061	0.39173	0.36939	0.012666	0.00031685
Fatty Acids	Palmitic acid	0.14931	0.87596	0.027255	0.59026	0.00072222	0.49493	0.16331	0.3021	0.015244	0.67464	0.95584	0.84051	0.84051	0.89984	0.20515	0.24439	0.10188	0.050431	0.35046	0.16013	0.033531	0.77013	0.84825	0.25816	0.048475	0.0022262	0.48915	0.40713	0.052786	0.071832	0.08586	0.063509	0.0033876	0.001104	5.3008e-06	0.00061106	0.025288	0.0017636	0.035385	0.0055424	0.0018059	4.2419e-06	1.5334e-06	0.0052227	0.090971	0.61742	5.5839e-05	7.5364e-06
Fatty Acids	Oleic acid	0.19406	0.62458	0.026061	0.62182	5.3008e-06	0.99197	0.24733	0.59616	0.08586	0.43306	0.3021	0.71181	0.58248	0.68671	0.75091	0.3515	0.23063	0.0088982	0.28073	0.25379	0.093123	0.34781	0.64625	0.22658	0.3749	0.00013513	0.50357	0.31897	0.27217	0.035888	0.20704	0.21278	0.14047	0.024534	0.0026659	0.011619	0.089931	0.02308	0.23063	0.081931	0.02308	0.00038184	0.00089623	0.045347	0.21278	0.77786	0.00074229	8.7376e-07
Oxylipins	12(13)-EpOME	0.16493	0.56487	0.17822	0.22935	0.69043	0.087878	0.42368	0.14632	0.80116	0.6627	0.77786	0.17467	0.29147	0.089931	0.89187	0.13657	0.65719	0.86406	0.23063	0.57176	0.91906	0.2854	0.14484	0.0029761	0.621	0.015244	0.46442	0.0086977	0.84843	0.30944	0.027663	0.43867	0.66453	0.51775	0.036397	0.093079	0.15388	0.17483	0.78561	0.26929	0.79337	0.024164	0.20141	0.67929	0.90781	0.80896	0.93981	0.14192
Oxylipins	5-HETE	0.6979	0.9158	0.55802	0.19867	0.035385	0.50464	0.0062308	0.055954	0.14047	0.88685	0.67929	0.92876	0.64188	0.73184	0.065923	0.42861	0.58216	0.025288	0.12928	0.42964	0.70481	0.51117	0.9318	0.56831	0.84825	0.26704	0.54049	0.90216	0.045979	0.80116	0.37768	0.074486	0.079076	0.18691	0.29011	0.38326	0.40898	0.13201	0.36939	0.81287	0.24308	0.16818	0.25162	0.1834	0.59616	0.83642	0.11008	0.11875
Oxylipins	9(10)-EpOME	0.10302	0.9318	0.66821	0.1012	0.9759	0.0035349	0.075387	0.14931	0.92779	0.52067	0.72047	0.14088	0.59417	0.13903	0.4478	0.20105	0.92379	0.45394	0.21666	0.29968	0.32381	0.49171	0.19588	0.038489	0.70165	0.037431	0.15101	0.027463	0.80402	0.10769	0.050431	0.85219	0.55802	0.4478	0.058142	0.26258	0.11498	0.37214	0.73945	0.099622	0.69043	0.1065	0.24947	0.87596	0.16331	0.50464	0.73945	0.78561
Oxylipins	13-KODE	0.83642	0.63538	0.44474	0.013222	0.018533	0.1834	0.00017391	0.0078228	0.074486	0.93198	0.43867	0.82305	0.99108	0.31192	0.3749	0.86972	0.12928	0.00035906	0.0027866	0.71669	0.82933	0.51117	0.40031	0.83642	0.56487	0.25162	0.2809	0.63784	0.19408	0.6979	0.82855	0.25379	0.33472	0.41483	0.1834	0.2368	0.47894	0.43264	0.2452	0.90382	0.32956	0.28775	0.15082	0.24098	0.69416	0.683	0.0076784	0.0090613
Oxylipins	14-HDoHE	0.85219	0.13761	0.67189	0.23166	0.83642	0.29248	0.060397	0.0033159	0.13761	0.41364	0.32956	0.80133	0.49274	0.28775	0.12003	0.83613	0.64989	0.22059	0.030659	0.74326	0.84843	0.1334	0.20704	0.039027	0.27383	0.60321	0.51451	0.23631	0.27976	0.49171	0.42368	0.0016026	0.11749	0.83642	0.41483	0.19406	0.51117	0.42964	0.78949	0.45703	0.39458	0.74709	0.71669	0.46323	0.089931	0.76628	0.43867	0.64262
Oxylipins	17-HDoHE	0.81679	0.33213	0.43565	0.44035	0.80116	0.58216	0.099622	0.0046294	0.47578	0.34078	0.42964	0.24102	0.98663	0.31941	0.12262	0.44155	0.68671	0.21278	0.033429	0.57176	0.37169	0.13761	0.18868	0.15698	0.21278	0.63538	0.45748	0.2482	0.25738	0.25597	0.79337	0.0018059	0.16331	0.98795	0.56831	0.27612	0.80896	0.66086	0.98393	0.47263	0.41777	0.67189	0.87596	0.54107	0.19588	0.76243	0.35313	0.60321
Oxylipins	14,15-DiHETE	0.025088	0.59908	0.015845	0.60584	0.47421	0.036319	0.45555	0.054702	0.15078	0.41099	0.23766	0.87561	0.87341	0.22031	0.54584	0.010223	0.77398	0.85544	0.65076	0.16587	0.065627	0.15701	0.32715	0.16752	0.93637	0.061141	0.13426	0.039067	0.76639	0.002515	0.068143	0.44941	0.78742	0.39761	0.42977	0.1578	0.23247	0.79127	0.58861	0.96021	0.5679	0.43878	0.53746	0.75298	0.244	0.055799	0.36139	0.53579
Oxylipins	TXB2	0.81287	0.24733	0.38046	0.70763	0.36392	0.89984	0.36665	0.21862	0.96386	0.48363	0.42368	0.61784	0.48558	0.83248	0.94782	0.89224	0.14192	0.98795	0.4119	0.58565	0.50463	0.83642	0.7054	0.014993	0.55802	0.08586	0.68271	0.43024	0.52067	0.23474	0.683	0.029345	0.67929	0.24947	0.040121	0.018533	0.13619	0.12793	0.29968	0.621	0.62458	0.087878	0.21471	0.51117	0.87993	0.4478	0.96386	0.23063
Oxylipins	19,20-DiHDPA	0.066865	0.35733	0.090668	0.42674	0.91853	0.069875	0.079523	0.0065532	0.75869	0.55599	0.28309	0.18928	0.12571	0.040162	0.96816	0.29133	0.94034	0.99403	0.48846	0.48052	0.3132	0.23871	0.33877	0.0018154	0.76441	0.01228	0.37363	0.010737	0.82607	0.012061	0.12623	0.244	0.79899	0.34798	0.067289	0.016821	0.0093108	0.18818	0.1594	0.67262	0.6114	0.14697	0.33229	0.97015	0.95424	0.32843	0.83588	0.41792
Oxylipins	11,12-DiHETrE	0.51117	0.80896	0.45086	0.29685	0.57176	0.040121	0.016823	0.12526	0.72804	0.66866	0.37768	0.67036	0.28352	0.20704	0.89187	0.56169	0.56831	0.17822	0.095223	0.39744	0.44294	0.097404	0.87993	0.42368	0.621	0.78949	0.39424	0.17467	0.57575	0.020383	0.43565	0.054531	0.49816	0.4885	0.8601	0.87596	0.95985	0.47894	0.53435	0.26036	0.683	0.76243	0.66821	0.33992	0.54107	0.46012	0.44474	0.75475
Oxylipins	14,15-DiHETrE	0.30454	0.77013	0.50464	0.074437	0.10417	0.014024	0.015499	0.13064	0.85219	0.57575	0.53101	0.48202	0.49633	0.10533	0.78949	0.39922	0.39744	0.024534	0.024534	0.61386	0.57575	0.034888	0.88789	0.93981	0.42072	0.57176	0.49633	0.070386	0.33649	0.10533	0.055954	0.23268	0.75091	0.3585	0.35046	0.43867	0.46012	0.15388	0.1834	0.50464	0.55461	0.47894	0.57869	0.29011	0.33472	0.26929	0.073593	0.10075
Oxylipins	LTE4	0.56144	0.43867	0.61386	0.88447	0.16655	0.14337	0.56831	0.67559	0.36121	0.15995	0.37768	0.17853	0.32751	0.89187	0.043548	0.13866	0.87993	0.62817	0.89585	0.92379	0.63319	0.96788	0.11623	0.78949	0.4417	0.13201	0.084188	0.17853	0.059017	0.55121	0.080971	0.045959	0.14337	0.13479	0.61386	0.73564	0.61386	0.25162	0.92379	0.51117	0.23063	0.2648	0.59265	0.27383	0.11008	0.84036	0.99598	0.54444
Oxylipins	8,9-DiHETrE	0.83198	0.44332	0.44788	0.88664	0.77015	0.42086	0.16752	0.34402	0.25479	0.70771	0.07344	0.57655	0.87341	0.95623	0.5408	0.80549	0.68919	0.81448	0.95623	0.331	0.066333	0.92645	0.72086	0.9801	0.24293	0.97811	0.66412	0.93318	0.40149	0.05434	0.55428	0.26141	0.055799	0.33877	0.20763	0.47421	0.77973	0.30219	0.53579	0.68735	0.81836	0.44029	0.62382	0.68735	0.40769	0.96816	0.24293	0.6966
Oxylipins	17,18-DiHETE	0.017948	0.48531	0.027663	0.81434	0.89187	0.027255	0.25597	0.050431	0.43867	0.27217	0.28306	0.71181	0.80133	0.16983	0.74709	0.018697	0.51117	0.60321	0.42072	0.27383	0.022588	0.19771	0.22059	0.43867	0.72047	0.14781	0.077588	0.046506	0.79143	0.011823	0.016823	0.96386	0.57869	0.79726	0.9318	0.43867	0.40319	0.89984	0.89585	0.97992	0.64625	0.80506	0.79337	0.87199	0.17822	0.16013	0.33992	0.90382
Oxylipins	TXB3	0.79337	0.24308	0.16331	0.18048	0.30698	0.72804	0.33213	0.29011	0.64989	0.52067	0.024164	0.33619	0.069399	0.11749	0.51117	0.94317	0.41483	0.62817	0.59968	0.096309	0.17932	0.31192	0.15855	0.028494	0.90382	0.042381	0.14928	0.05337	0.3451	0.012884	0.33992	0.25816	0.94381	0.14632	0.03202	0.0061114	0.01975	0.039571	0.053136	0.54782	0.25597	0.076297	0.10417	0.46323	0.81679	0.40319	0.77399	0.18166
Oxylipins	19-HETE	0.59265	0.13619	0.50464	0.35998	0.042962	0.24947	0.053136	0.11623	0.56487	0.46816	0.4478	0.28615	0.27056	0.57869	0.80506	0.81943	0.083878	0.082901	0.12526	0.42666	0.83569	0.17994	0.33472	0.31192	0.030216	0.17315	0.64188	0.2434	0.076201	0.59968	0.39458	0.35046	0.46012	0.19955	0.0090613	0.078141	0.076297	0.040677	0.035385	0.63899	0.30454	0.050431	0.04912	0.20141	0.64262	0.89984	0.055954	0.03391
Clinical	FEV1	0.0049186	0.73564	0.024909	0.72441	0.19771	0.080019	0.6103	0.44474	0.27842	0.72926	0.76243	0.05337	0.045788	0.014502	0.5079	0.24133	0.80506	0.20327	0.33472	0.063509	0.16533	0.9759	0.77399	0.064306	0.76243	0.018239	0.50357	0.28352	0.13963	0.0015269	0.24733	0.13479	0.39744	0.055239	0.05383	0.081931	0.014502	0.056676	0.10188	0.30698	0.1065	0.10533	0.098508	0.4885	0.19588	0.35581	0.098508	0.098508
Clinical	IgE	0.00088065	0.46626	0.090039	0.075373	0.97213	0.13585	0.18098	0.10637	0.18449	0.82299	0.81443	0.4052	0.078449	0.00069355	0.27254	0.23039	0.48515	0.73963	0.26574	0.22519	0.85794	0.090039	0.97014	0.14386	0.95821	0.24921	0.4052	0.041508	0.95786	0.065522	0.088463	0.94827	0.89279	0.31438	0.54404	0.32573	0.22117	0.33215	0.5028	0.98606	0.53234	0.83779	0.82025	0.94231	0.31313	0.014248	0.90069	0.99005
Clinical	FER	0.27842	0.31192	0.070104	0.46094	0.70165	0.9358	0.53771	0.34781	0.87199	0.65676	0.16655	0.0088887	4.2566e-06	0.013106	0.96386	0.69966	0.45086	0.12659	0.54107	0.98795	0.57014	0.53435	0.73564	0.093079	0.98393	0.13619	0.91988	0.22479	0.22596	0.061938	0.84036	0.92779	0.94782	0.43867	0.4417	0.24947	0.16171	0.18515	0.34781	0.77399	0.49493	0.33213	0.52105	0.89187	0.42072	0.96386	0.34254	0.13064
Clinical	Reversibility	0.33603	0.33895	0.092899	0.29894	0.8056	0.57269	0.36439	0.29265	0.95098	0.78633	0.062237	0.10904	0.013971	0.020183	0.97994	0.81103	0.85142	0.89106	0.74335	0.67848	0.84071	0.056152	0.61772	0.20272	0.98885	0.94653	0.62238	0.36592	0.58706	0.052884	0.75825	0.97102	0.24324	0.96211	0.61573	0.78183	0.61573	0.6297	0.70545	0.32879	0.87561	0.4402	0.46952	0.4453	0.66207	0.60584	0.90877	0.97994
Clinical	Neutrophil (BAL)	0.74877	0.81028	0.66843	0.17749	0.97608	0.67393	0.38825	0.95616	0.70729	0.0073442	0.032438	0.0051458	0.096538	0.38402	0.24105	0.54589	0.42154	0.2628	0.41271	0.16676	0.071271	0.23999	0.00012895	0.37012	0.72982	0.16594	0.0020578	0.23755	0.0073334	0.26617	0.30134	0.23475	0.74117	0.31368	0.49573	0.25615	0.055342	0.027666	0.031482	0.90649	0.084894	0.39679	0.4471	0.095494	0.68684	0.2673	0.71853	0.49252
Clinical	Th17 (PBMC)	0.49808	0.36139	0.79513	0.69712	0.61671	0.59209	0.48687	0.86918	0.57994	0.1145	0.5679	0.80777	0.32592	0.78549	0.64173	0.36094	0.42086	0.81448	0.3641	0.21245	0.055693	0.66531	0.039313	0.84174	0.1041	0.40048	0.0094824	0.35529	0.093123	0.1982	0.78549	0.22533	0.14547	0.48052	0.076671	0.23247	0.069875	0.20954	0.041903	0.085977	0.075737	0.05398	0.016964	0.12691	0.16505	0.37786	0.32587	0.36683
Clinical	Th2 (PBMC)	0.58982	0.97808	0.13396	0.4991	0.52689	0.7299	0.58808	0.73178	0.93231	0.038556	0.47989	0.77739	0.85791	0.19295	0.93628	0.38836	0.010679	0.69063	0.65393	0.33159	0.0081283	0.69434	0.035501	0.42762	0.051841	0.098392	0.028503	0.76001	0.26394	0.10358	0.88279	0.73367	0.66121	0.18134	0.04911	0.0446	0.17359	0.15094	0.18397	0.061135	0.079063	0.022776	0.031066	0.061531	0.30393	0.35127	0.4202	0.030834
Clinical	MAIT (PBMC)	0.035385	0.81287	0.050431	0.87124	0.011419	0.16493	0.40898	0.98393	0.013106	0.15995	0.42368	0.25799	0.088814	0.070104	0.064306	0.10783	0.41483	0.18515	0.29248	0.0032454	0.18808	0.7054	0.30454	0.072709	0.89585	0.012451	0.10382	0.10382	0.018028	0.0014189	0.29487	0.13903	0.35046	0.0035349	0.024534	0.041807	0.026061	0.034888	0.078141	0.8443	0.19406	0.17822	0.23474	0.50139	0.30944	0.044142	0.41777	0.14192
Clinical	IL13 (Serum)	0.26336	0.026421	0.16055	0.34769	0.34791	0.050442	0.056889	0.10965	0.63537	0.50951	0.93619	0.12214	0.074858	0.46044	0.27128	0.91727	0.24261	0.83542	0.79843	0.21207	0.72257	0.31813	0.98603	0.59278	0.65165	0.84914	0.98882	0.4663	0.09127	0.86094	0.93818	0.56508	0.75421	0.69206	0.45579	0.8237	0.42397	0.91432	0.57195	0.98004	0.99002	0.72387	0.62104	0.91234	0.75421	0.215	0.63358	0.80424
Transcriptomics	---	0.076297	0.023798	0.0017636	0.84489	0.071832	0.22457	0.82463	0.15855	0.14192	0.55897	0.016018	0.17088	0.0056607	0.10417	0.38607	0.18525	0.47894	0.55121	0.80896	0.58914	0.64493	0.3749	0.45394	0.016283	0.38607	0.016551	0.19248	0.052572	0.36718	0.00094481	0.27842	0.92379	0.86406	0.047836	0.23268	0.066743	0.12659	0.20704	0.49816	0.9318	0.30454	0.19406	0.49493	0.70165	0.27612	0.083878	0.92379	0.16331
Transcriptomics	SPTBN4	0.065605	0.0077562	0.01428	0.30076	0.97015	0.26588	0.080492	0.0052847	0.83783	0.2776	0.019715	0.03963	0.012408	0.042497	0.9027	0.29477	0.55089	0.54248	0.12421	0.77589	0.7819	0.014916	0.27268	0.018298	0.35868	0.13812	0.16714	0.0075971	0.96434	0.048798	0.11258	0.52252	0.85544	0.28543	0.83783	0.29254	0.38485	0.4418	0.9801	0.59209	0.79127	0.81836	0.56619	0.97811	0.49166	0.27959	0.35868	0.84174
Transcriptomics	MTCH1	0.016283	0.14632	0.0099149	0.92876	0.083878	0.18868	0.8443	0.88391	0.03391	0.31141	0.23063	0.19659	0.0060712	0.05177	0.079076	0.14945	0.53435	0.23474	0.76628	0.3144	0.89328	0.61386	0.40898	0.17822	0.33992	0.040121	0.96435	0.070386	0.74158	0.0063522	0.17994	0.77786	0.24947	0.095223	0.17994	0.21085	0.3021	0.38607	0.72804	0.2648	0.19226	0.16171	0.16493	0.57869	0.087878	0.016823	0.29968	0.12659
Transcriptomics	REM1	0.023437	0.045347	0.018832	0.23166	0.43264	0.14781	0.4478	0.11875	0.47894	0.36718	0.19771	0.0066565	0.0017201	0.026061	0.16013	0.029921	0.92379	0.80896	0.42964	0.41777	0.47329	0.13064	0.46012	0.026454	0.29011	0.0079694	0.35095	0.00021075	0.47329	0.042381	0.021698	0.75091	0.1065	0.0063522	0.099622	0.090971	0.13619	0.055954	0.58216	0.41777	0.14484	0.10417	0.47894	0.27383	0.14632	0.10302	0.9158	0.23474
Transcriptomics	KLRC4-KLRK1 /// KLRK1	0.010458	0.3021	0.018832	0.38472	0.34254	0.11498	0.55802	0.061938	0.3749	0.80402	0.42666	0.048714	0.00050707	0.0023834	0.28775	0.11503	0.55121	0.22457	0.89187	0.12132	0.63905	0.28073	0.55461	0.00015078	0.82463	0.0014542	0.81	0.0032966	0.20331	0.0054341	0.18515	0.71292	0.71292	0.012884	0.0087374	0.0025497	0.0012532	0.0050183	0.035888	0.80896	0.27612	0.065923	0.23268	0.63538	0.94782	0.074486	0.62458	0.093079
Transcriptomics	---	0.079076	0.022728	0.10533	0.61387	0.98795	0.23063	0.47263	0.28775	0.63899	0.82933	0.17315	0.043684	0.075476	0.15543	0.097404	0.11503	0.57522	0.70165	0.96788	0.89585	0.78515	0.40319	0.78949	0.075387	0.0095658	0.058886	0.53674	0.0088887	0.72926	0.17148	0.074486	0.5079	0.14632	0.1834	0.31192	0.26036	0.19226	0.46323	0.58216	0.59968	0.29727	0.3169	0.59616	0.30454	0.10188	0.089931	0.36665	0.88391
Transcriptomics	ARPC2	0.083878	0.87596	0.25597	0.63784	0.81287	0.40031	0.66453	0.35046	0.55802	0.30331	0.59616	0.09	0.0020943	0.012451	0.48212	0.13246	0.52105	0.28775	0.63538	0.70915	0.35384	0.89984	0.51117	0.027663	0.4478	0.03202	0.57089	0.1442	0.45295	0.15855	0.5079	0.63177	0.54782	0.21471	0.23888	0.27383	0.099622	0.28775	0.40608	0.66453	0.32956	0.20515	0.4478	0.73184	0.59616	0.047836	0.85615	0.3585
Transcriptomics	EPHA10	0.39458	0.06511	0.070104	0.18442	0.87993	0.2368	0.060397	0.071832	0.95985	0.93198	0.14192	0.040345	0.0010382	0.24733	0.32701	0.44591	0.43565	0.49816	0.15698	0.47894	0.62735	0.43264	0.61742	0.29011	0.80896	0.10769	0.17659	0.1012	0.62735	0.01975	0.42666	0.80896	0.96788	0.14192	0.56831	0.25597	0.29727	0.37214	0.82071	0.13619	0.14931	0.27383	0.45086	0.7054	0.15235	0.27156	0.85615	0.47263
Transcriptomics	TRIT1	0.39458	0.683	0.078141	0.53674	0.078141	0.22258	0.42072	0.22457	0.15855	0.47329	0.66453	0.30503	0.13281	0.56144	0.015756	0.37892	0.068408	0.074486	0.39744	0.061938	0.12561	0.82855	0.83642	0.081931	0.67929	0.0087374	0.96435	0.08306	0.14955	0.076297	0.098508	0.43565	0.0027866	0.00092026	1.0461e-05	0.0010218	0.010834	0.00092026	0.021363	0.0037659	0.0027866	0.00022131	9.9717e-05	0.0062308	0.093079	0.25597	0.014261	0.0046294
Transcriptomics	MME	0.20141	0.018832	0.066743	0.12813	0.82855	0.17652	0.095223	0.01975	0.86803	0.74776	0.020065	0.17853	0.018773	0.013106	0.37768	0.27636	0.74709	0.076297	0.02308	0.28073	0.78515	0.045959	0.46948	0.078141	0.11129	0.35046	0.12813	0.015196	0.76639	0.0087374	0.11749	0.38607	0.77399	0.10188	0.63177	0.27842	0.31941	0.53771	0.82463	0.88391	0.49171	0.69043	0.88789	0.9759	0.29968	0.010834	0.099622	0.65354
Transcriptomics	VEGFB	0.9158	0.035888	0.58216	0.41366	0.3144	0.62817	0.35581	0.034888	0.095223	0.51529	0.063509	0.26047	0.14928	0.05383	0.1834	0.8529	0.3169	0.12526	0.050431	0.34254	0.17364	0.12132	0.57522	0.46012	0.064306	0.38326	0.9599	0.2482	0.25017	0.64989	0.95183	0.081931	0.061938	0.30454	0.073593	0.22059	0.24308	0.15235	0.071832	0.061938	0.042381	0.080019	0.010458	0.026454	0.10533	0.4478	0.028076	0.22059
Transcriptomics	MSI2	0.40031	0.67189	0.38046	0.64997	0.56144	0.026852	0.32193	0.42368	0.88391	0.96434	0.28073	0.1442	0.040997	0.03391	0.098508	0.21773	0.22658	0.64625	0.81679	0.16655	0.81033	0.23063	0.22658	0.060397	0.73945	0.50464	0.19659	0.21806	0.2002	0.0097391	0.58565	0.53435	0.90781	0.51775	0.3021	0.36392	0.080019	0.53435	0.25816	0.43565	0.65719	0.46948	0.49171	0.79337	0.6103	0.16171	0.26704	0.77786
Transcriptomics	DAGLA	0.070964	0.56831	0.12003	0.21365	0.75091	0.083878	0.42368	0.65354	0.47578	0.55342	0.16983	0.0044544	0.0015328	0.0069892	0.16818	0.061469	0.74709	0.54107	1	0.20515	0.61573	0.18691	0.62458	0.099622	0.29968	0.055954	0.98217	0.0060712	0.36718	0.024909	0.045959	0.96788	0.075387	0.10769	0.14931	0.33731	0.19955	0.29727	0.64262	0.12659	0.15235	0.14781	0.22457	0.44474	0.13479	0.073593	0.73184	0.3169
Transcriptomics	CNOT6L	0.84825	0.35581	0.16818	0.23397	0.65719	0.15388	0.21085	0.15082	0.36392	0.47329	0.055954	0.031508	0.066503	0.2648	0.80896	0.27305	0.50139	0.6103	0.6103	0.42072	0.35825	0.40319	0.14047	0.0062308	0.16013	0.080019	0.12208	0.14253	0.24661	0.081931	0.30698	0.87993	0.78173	0.029778	0.30454	0.1334	0.047836	0.071832	0.20894	0.9759	0.13903	0.30944	0.86803	0.19406	0.16818	0.27383	0.10075	0.97992
Transcriptomics	UCN2	0.043548	0.15698	0.0075362	0.74981	0.3585	0.099622	0.88789	0.89585	0.20141	0.96434	0.099622	0.062784	0.054996	0.075387	0.26704	0.27969	0.80896	0.61386	0.91181	0.46635	0.43306	0.097404	0.92379	0.12526	0.3169	0.2854	0.56322	0.091197	0.63319	0.016823	0.11129	0.42368	0.4119	0.15855	0.46012	0.45086	0.47894	0.51446	0.87199	0.75475	0.45086	0.683	0.72804	0.73564	0.13064	0.075387	0.58216	0.46012
Transcriptomics	NR0B2	0.10888	0.16493	0.0011916	0.48558	0.43565	0.4478	0.53435	0.19588	0.23474	0.63319	0.098508	0.18244	0.00031951	0.066743	0.21862	0.042213	0.16655	0.80896	0.40031	0.42964	0.57575	0.068408	0.66453	0.18691	0.59616	0.046578	0.36608	0.024271	0.091318	0.011619	0.09202	0.59265	0.15082	0.0043546	0.14047	0.028494	0.16655	0.030659	0.28775	0.15082	0.013106	0.035888	0.11498	0.11749	0.22457	0.15388	0.50139	0.036911
Transcriptomics	CYB5RL	0.39458	0.67559	0.0013505	0.89331	0.13619	0.79726	0.52105	0.39744	0.45703	0.63319	0.096309	0.1206	0.0020943	0.21278	0.68671	0.08819	0.020383	0.069252	0.41483	0.49493	0.28361	0.54107	0.55802	0.016823	0.58914	0.0013844	0.58636	0.10515	0.12561	0.0040095	0.33472	0.78949	0.22457	0.020065	0.011619	0.0055424	0.049772	0.012238	0.12394	0.12003	0.017099	0.00092026	0.011619	0.039571	0.4119	0.85615	0.21666	0.00082729
Transcriptomics	DBI	0.45394	0.42368	0.16818	0.54425	0.56144	0.84825	0.53101	0.54107	0.68671	0.68064	0.3169	0.14928	0.0047914	0.20894	0.67559	0.39512	0.23474	0.22457	0.43264	0.55802	0.15211	0.74709	0.66453	0.0057644	0.37214	0.031561	0.59417	0.41366	0.3627	0.31941	0.98393	0.9759	0.73184	0.096309	0.15082	0.10188	0.056676	0.21862	0.2648	0.9318	0.35581	0.16493	0.53435	0.69043	0.98795	0.076297	0.98795	0.21862
Transcriptomics	DGKQ	0.0087374	0.24308	0.0084232	0.5786	0.034396	0.16171	0.6979	0.17148	0.05245	0.99676	0.21862	0.29147	0.010544	0.022037	0.40319	0.039655	0.57869	0.27842	0.75858	0.40031	0.65083	0.40898	0.79726	0.0045362	0.79726	0.00066471	0.47847	0.0059317	0.65676	0.0069892	0.083878	0.7054	0.5079	0.039027	0.046578	0.032954	0.0889	0.078141	0.47894	0.66821	0.26929	0.045959	0.20894	0.48212	0.23268	0.035888	0.66086	0.058142
Transcriptomics	PPM1K	0.013558	0.26929	0.074486	0.44035	0.3585	0.17994	0.95985	0.40031	0.10188	0.48363	0.45703	0.35095	0.15803	0.1334	0.061938	0.10265	0.7054	0.67929	0.42666	0.85615	0.89328	0.34254	0.52105	0.06511	0.65354	0.0045362	0.8274	0.0081448	0.63319	0.40608	0.0044446	0.51446	0.035385	0.0082696	0.053136	0.027663	0.06511	0.058142	0.28775	0.23888	0.021698	0.044741	0.12793	0.064306	0.031107	0.0075362	0.50464	0.16171
Transcriptomics	PICALM	0.013331	0.065923	0.0051196	0.40066	0.56831	0.36392	0.16655	0.0076784	0.67189	0.63319	0.17994	0.26549	0.059226	0.0088982	0.88789	0.071305	0.58914	0.62458	0.22258	0.64989	0.9773	0.022728	0.45703	0.021698	0.43565	0.14931	0.36303	0.012958	0.85481	0.1065	0.032954	0.50464	0.65354	0.21862	0.51775	0.10075	0.15698	0.29011	0.4119	0.79337	0.37768	0.46012	0.9198	0.54444	0.56487	0.081931	0.32193	0.78173
Transcriptomics	FBXL6	0.55802	0.23063	0.38607	0.037208	0.35046	0.55461	0.11498	0.22059	0.60675	0.95139	0.16171	0.1206	0.058361	0.03202	0.80116	0.94317	0.82855	0.2286	0.12928	0.75091	0.64493	0.27842	0.32701	0.18515	0.13903	0.79337	0.10921	0.29956	0.99676	0.24308	0.46323	0.96386	0.52768	0.64625	0.73564	0.88391	0.56831	0.72804	0.9158	0.72047	0.76628	0.73945	0.53101	0.82855	0.48531	0.11623	0.09202	0.31941
Transcriptomics	LOC100129129	0.025288	0.58914	0.0032454	0.6581	0.22258	0.05245	0.83642	0.58216	0.17652	0.51529	0.15855	0.23166	0.0034699	0.0082696	0.14192	0.019163	0.12928	0.34781	0.97189	0.094146	0.29139	0.16983	0.81679	0.14337	0.69043	0.049772	0.99108	0.042324	0.17646	0.00038184	0.073593	0.9318	0.22059	0.059638	0.089931	0.087878	0.13479	0.11875	0.36392	0.0889	0.057405	0.036911	0.036397	0.33731	0.20141	0.070964	0.24733	0.027255
Transcriptomics	TARP /// TRGC2	0.016551	0.12003	0.013558	0.84489	0.37768	0.17652	0.59265	0.027255	0.51117	0.52606	0.20141	0.22706	0.012442	0.0069892	0.6979	0.045819	0.49493	0.69043	0.61386	0.80116	0.91906	0.11251	0.47894	0.0024378	0.72047	0.042381	0.74556	0.02943	0.55897	0.0081184	0.33213	0.30454	0.98393	0.23063	0.12262	0.075387	0.080019	0.25379	0.46635	0.90781	0.83248	0.17822	0.51775	0.73564	0.8443	0.14484	0.86406	0.14047
Transcriptomics	OLAH	0.035888	0.52768	0.032485	0.75833	0.43867	0.52436	0.87596	0.71292	0.33213	0.25738	0.81287	0.169	0.064623	0.40898	0.39744	0.10265	0.64262	0.021032	0.25162	0.95584	0.81033	0.78173	0.42368	0.15082	0.42964	0.0029761	0.47494	0.10921	0.61573	0.37768	0.15855	0.89585	0.30944	0.17994	0.20327	0.12132	0.16655	0.13903	0.3889	0.36392	0.051097	0.070104	0.11498	0.050431	0.077215	0.25597	0.40319	0.053136
Transcriptomics	LZTS2	0.026852	0.78949	0.0069892	0.69098	0.16818	0.0072584	0.90382	0.97992	0.089931	0.47329	0.7054	0.31335	0.062784	0.27842	0.016551	0.0020433	0.071832	0.065923	0.23474	0.081931	0.068644	0.75475	0.89984	0.20515	0.89187	0.0081184	0.83614	0.055823	0.17932	0.0018059	0.082901	0.71669	0.072709	0.040121	0.029345	0.04912	0.061164	0.058886	0.17148	0.03202	0.019134	0.0067283	0.0059939	0.054531	0.028076	0.30944	0.3144	0.023798
Transcriptomics	AP1G2	0.50464	0.36665	0.13903	0.97771	0.9759	0.57522	0.32701	0.18515	0.58914	0.84206	0.049772	0.11623	0.14253	0.24098	0.683	0.2264	0.64625	0.41483	0.55121	0.55802	0.76639	0.67559	0.24947	0.0059939	0.11374	0.066743	0.345	0.33328	0.717	0.22658	0.57522	0.43867	0.95985	0.43867	0.60321	0.2854	0.10769	0.25816	0.29011	0.5079	0.33731	0.34517	0.87199	0.24308	0.36665	0.683	0.18868	0.67559
Transcriptomics	ITGA4	0.11129	0.75475	0.1334	0.30779	0.8443	0.18166	0.4119	0.57176	0.42368	0.328	0.29248	0.345	0.03542	0.0052227	0.57869	0.048674	0.29968	0.66086	0.72425	0.64625	0.84206	0.13201	0.79726	0.049772	0.78949	0.12793	0.91988	0.06188	0.43799	0.0889	0.09202	0.28306	0.2368	0.3889	0.2286	0.34781	0.32956	0.35581	0.65354	0.33992	0.25162	0.10888	0.20704	0.39744	0.26929	0.066743	0.75858	0.33213
Transcriptomics	TBRG1	0.018239	0.3169	4.6684e-05	0.99554	0.095223	0.21471	0.75858	0.73184	0.097404	0.47844	0.25597	0.20077	0.0026739	0.070964	0.17652	0.011107	0.16331	0.009227	0.19406	0.33992	0.22932	0.62458	0.84036	0.057405	0.56144	0.0024378	0.91102	0.026987	0.25376	0.0032454	0.059638	0.86406	0.14484	0.020383	0.042962	0.010458	0.045959	0.011619	0.094146	0.3144	0.017099	0.0085791	0.020705	0.03202	0.20894	0.28306	0.30944	0.0068577
Transcriptomics	MAPK8	0.83248	0.096309	0.10417	0.18442	0.41483	0.39458	0.35046	0.26929	0.17148	0.65083	0.036397	0.046506	0.030455	0.055954	0.64625	0.15392	0.4478	0.80506	0.41777	0.76628	0.62153	0.076297	0.074486	0.086865	0.15082	0.58565	0.36608	0.034265	0.6627	0.10302	0.2452	0.23268	0.98393	0.59265	0.68671	0.46012	0.42368	0.39458	0.69043	0.87993	0.69043	0.51446	0.87993	0.67189	0.91181	0.64262	0.13761	0.86803
Transcriptomics	RP11-6F2.5	0.9318	0.10302	0.34517	0.44375	0.072709	0.7054	0.13064	0.044142	0.4119	0.47844	0.11875	0.094858	0.0025347	0.27156	0.89984	0.78626	0.85615	0.86406	0.72047	0.37214	0.26103	0.17652	0.73564	0.0889	0.050431	0.66453	0.52928	0.10649	0.63905	0.81679	0.99598	0.045347	0.683	0.64262	0.64262	0.50139	0.48212	0.69043	0.61386	0.2648	0.9158	0.64625	0.25597	0.92779	0.59265	0.33213	0.034888	0.41777
Transcriptomics	---	0.15082	0.8601	0.21278	0.29147	0.17822	0.82071	0.24733	0.40898	0.36665	0.66866	0.13201	0.071383	0.0015328	0.014746	0.4119	0.066251	0.35313	0.12793	0.9158	0.4119	0.49934	0.2452	0.63538	0.096309	0.38607	0.0039269	0.54049	0.012442	0.03614	0.0889	0.13903	0.621	0.025288	0.067571	0.029778	0.063509	0.079076	0.017378	0.18868	0.083878	0.022728	0.0030416	0.019134	0.079076	0.39173	0.84036	0.17315	0.0068577
Transcriptomics	RNF123	0.73184	0.24098	0.058886	0.6581	0.74326	0.86803	0.89585	0.076297	0.92779	0.93198	0.10417	0.797	0.029939	0.18166	0.78949	0.2383	0.24098	0.85219	0.63899	0.83642	0.26103	0.21278	0.9318	0.036397	0.36665	0.51775	0.69098	0.21365	0.717	0.12793	0.94782	0.051097	0.36121	0.42368	0.8601	0.26258	0.46012	0.72804	0.6979	0.29011	0.8601	0.87993	0.57522	0.7054	0.34781	0.066743	0.080019	0.86803
Transcriptomics	MIER1	0.79337	0.71669	0.39744	0.18442	0.96386	0.37214	0.3889	0.63899	0.61386	0.53693	0.51117	0.096102	0.032589	0.21085	0.66086	0.9205	0.26258	0.621	0.69043	0.13479	0.67464	0.55461	0.57176	0.016283	0.30454	0.10417	0.46792	0.66626	0.46306	0.087878	0.82463	0.86406	0.71292	0.10188	0.19226	0.15235	0.03202	0.058886	0.11374	0.86803	0.2368	0.33992	0.50139	0.43565	0.35046	0.21666	0.56144	0.80896
Transcriptomics	DAG1	0.21666	0.093079	0.057405	0.59026	0.18166	0.36121	0.12526	0.14781	0.78561	0.53148	0.18166	0.11623	0.010324	0.039571	0.53101	0.30724	0.98795	0.47578	0.621	0.89585	0.96434	0.090971	0.77013	0.41777	0.20894	0.89984	0.9688	0.2809	0.5479	0.058886	0.42368	0.57869	0.29968	0.40898	1	0.60675	0.4478	0.70915	0.56831	0.51117	0.29487	0.77786	0.82071	0.7054	0.42072	0.36392	0.54107	0.75858
Transcriptomics	DESI2	0.46635	0.29968	0.084865	0.57474	0.40319	0.64262	0.54444	0.056676	0.88391	0.96434	0.11008	0.15983	0.0062134	0.02308	0.84036	0.53753	0.72425	0.94381	0.92779	0.35313	0.77888	0.18515	0.6979	0.0026659	0.21278	0.25162	1	0.073408	0.40885	0.055239	0.66821	0.2286	0.621	0.096309	0.28775	0.027663	0.013106	0.12659	0.036911	0.26258	0.66821	0.83248	0.77786	1	0.28775	0.035888	0.12793	0.82855
Transcriptomics	CNTN4	0.045959	0.3169	0.084865	0.031508	0.90781	0.34781	0.076297	0.045959	0.97189	0.95139	0.75475	0.045078	0.024708	0.11749	0.4885	0.015677	0.95584	0.73184	0.3889	0.63538	0.7109	0.66453	0.51446	0.080971	0.33992	0.00096992	0.35395	0.0038393	0.62735	0.33992	0.030659	0.95584	0.34781	0.041807	0.23474	0.11875	0.14781	0.057405	0.55461	0.32956	0.037431	0.061164	0.32956	0.045959	0.037431	0.16171	0.39744	0.2854
Transcriptomics	C14orf166B	0.12288	0.13313	0.17679	0.091197	0.4106	0.33229	0.47421	0.80672	0.65439	0.37169	0.011845	3.3564e-05	0.0031181	0.0090496	0.10177	0.66526	0.46328	0.31828	0.95822	0.25152	0.28528	0.14849	0.42531	0.19088	0.26364	0.058042	0.25413	0.0067109	0.1085	0.069439	0.02174	0.21636	0.077613	0.075737	0.26364	0.28426	0.10648	0.069875	0.30097	0.39475	0.079523	0.28426	0.35599	0.27382	0.21636	0.57305	0.30219	0.27959
Transcriptomics	ARPC2	0.13479	0.81287	0.57522	0.43024	0.81287	0.6103	0.3749	0.23888	0.85219	0.5814	0.44474	0.091197	0.00091648	0.0010218	0.46012	0.11503	0.64989	0.66453	0.87993	0.69043	0.19107	0.43867	0.81679	0.10533	0.57522	0.19226	0.76688	0.1012	0.46306	0.19046	0.61386	0.25162	0.64625	0.62458	0.52105	0.67929	0.28775	0.65354	0.72047	0.683	0.7054	0.41777	0.70165	0.72047	0.89585	0.087878	0.55461	0.63899
Transcriptomics	RAB27A	0.062719	0.63177	0.019134	0.83614	0.54444	0.12262	0.68671	0.16983	0.76243	0.95139	0.45394	0.41695	0.24579	0.19955	0.79726	0.021123	0.32193	0.2286	0.43867	0.65354	0.24661	0.53101	0.35046	0.0011326	0.75475	0.010093	0.5594	0.1266	0.60419	0.066743	0.29487	0.63538	0.66453	0.072709	0.089931	0.033429	0.01975	0.033429	0.089931	0.83248	0.17822	0.090971	0.33731	0.11129	0.25379	0.3144	0.62817	0.19771
Transcriptomics	PAIP1	0.33472	0.17483	0.22059	0.86684	0.90382	0.86406	0.51775	0.42368	0.54782	0.31551	0.33472	0.13924	0.006506	0.24098	0.36121	0.3515	0.82463	0.33992	0.34781	0.59265	0.53693	0.54782	0.6979	0.21862	0.010645	0.10417	0.88889	0.33911	0.98379	0.16983	0.89984	0.57869	0.64989	0.18691	0.69416	0.39744	0.23063	0.47578	0.38046	0.86803	0.25162	0.58216	0.83248	0.43264	0.27612	0.077215	0.27156	0.9759
Transcriptomics	INPP5B	0.40898	0.037958	0.036911	0.096102	0.58216	0.39458	0.20894	0.13064	0.35046	0.75396	0.093079	0.0017201	0.0005617	0.076297	0.32446	0.11503	0.58565	0.73564	0.59265	0.93981	0.57575	0.28073	0.16983	0.033429	0.17652	0.03202	0.41366	0.0088887	0.39003	0.12132	0.069252	0.9158	0.16493	0.036911	0.13619	0.051097	0.04912	0.025672	0.19771	0.19955	0.039571	0.037431	0.22059	0.078141	0.40031	0.69416	0.61386	0.25597
Transcriptomics	PPP2R5A	0.20327	0.98393	0.34517	0.93321	0.91181	0.53435	0.3889	0.060397	0.95183	0.78515	0.49493	0.71181	0.08306	0.047204	0.9198	0.026719	0.30944	0.60321	0.98795	0.98393	0.53693	0.58914	0.48212	0.0081184	0.89585	0.054531	0.73285	0.19248	0.65083	0.24308	0.80506	0.071832	0.6979	0.55461	0.3749	0.20894	0.090971	0.34781	0.29968	0.64262	0.66821	0.27156	0.72047	0.77399	0.95584	0.12659	0.1334	0.56487
Transcriptomics	LIN37	0.49171	0.53101	0.014261	0.77975	0.055239	0.4119	0.80506	0.99598	0.26258	0.63319	0.068408	0.13924	0.00054296	0.25162	0.16493	0.1703	0.017378	0.047204	0.52105	0.35581	0.49934	0.99598	0.75475	0.049772	0.80896	0.0011326	0.67858	0.13281	0.023216	0.011619	0.25162	0.58216	0.14047	0.0049186	0.012451	0.0053275	0.021698	0.0035349	0.070104	0.057405	0.0026073	0.00051452	0.0037659	0.027663	0.22457	0.40608	0.14632	0.0012221
Transcriptomics	ATP6V1G1	0.16171	0.04912	0.038489	0.3218	0.63177	0.54444	0.66821	0.24733	0.25597	0.66866	0.36392	0.043	0.00018732	0.25162	0.17652	0.45911	0.74326	0.55802	0.63538	0.82463	0.46306	0.65719	0.68671	0.12003	0.14337	0.020705	0.9421	0.0096874	0.81665	0.15082	0.26704	0.94782	0.79726	0.062719	0.39173	0.15543	0.36121	0.31192	0.88391	0.63899	0.35313	0.36939	0.77786	0.67929	0.38326	0.030216	0.70165	0.43565
Transcriptomics	PTPRC	0.15235	0.27612	0.0097391	0.33328	0.8601	0.28775	0.14781	0.013106	0.97189	0.328	0.21085	0.11623	0.0030502	0.072709	0.84036	0.034151	0.2368	0.72425	0.39173	0.87199	0.81033	0.060397	0.098508	0.0062308	0.65719	0.015499	0.28352	0.0060712	0.48884	0.081931	0.13064	0.3889	0.99598	0.13064	0.22457	0.034396	0.089931	0.044142	0.30454	0.77013	0.23888	0.083878	0.47578	0.29727	0.82855	0.57176	0.41777	0.15388
Transcriptomics	TCEAL3	0.56448	0.10235	0.063546	0.59601	0.95027	0.66713	0.94233	0.22533	0.67629	0.61844	0.1041	0.78399	0.10637	0.096099	0.82225	0.43917	0.57133	0.60259	0.52417	0.87311	0.68349	0.74538	0.7397	0.01571	0.039313	0.50292	0.89991	0.60781	0.82925	0.12354	0.71711	0.12024	0.83783	0.2603	0.51759	0.13884	0.1041	0.29374	0.12354	0.17937	0.67262	0.7059	0.93042	0.66713	0.57994	0.10708	0.17679	0.9324
Transcriptomics	ID2	0.023437	0.35046	0.040121	0.5072	0.54782	0.039027	0.82855	0.2854	0.32956	0.96434	0.43867	0.10784	0.069399	0.055239	0.38326	0.47702	0.82071	0.54782	0.79337	0.6103	0.81033	0.17822	0.9318	0.0026073	0.94381	0.036911	0.81434	0.020992	0.86761	0.065923	0.11875	0.94782	0.8443	0.20704	0.1334	0.090971	0.073593	0.22059	0.4478	0.97189	0.77013	0.45394	0.67929	0.94782	0.55121	0.042962	0.73945	0.39458
Transcriptomics	PDZD4	0.018832	0.32956	0.24308	0.50357	0.2286	0.072709	0.10075	0.0063522	0.52768	0.62735	0.58565	0.27056	0.046506	0.0024378	0.27156	0.26328	0.58216	0.25816	0.29011	0.27383	0.95786	0.011823	0.621	0.045959	0.87596	0.60321	0.44035	0.019857	0.62735	0.035385	0.34517	0.23268	0.69043	0.55121	0.56831	0.25816	0.086865	0.73564	0.30454	0.65719	0.69043	0.70165	0.59265	0.22258	0.621	0.03202	0.20515	0.38046
Transcriptomics	---	0.40319	0.24733	0.18868	0.46792	0.9759	0.19226	0.2648	0.036911	0.86803	0.47329	0.062719	0.41695	0.060101	0.042381	0.8443	0.57642	0.4119	0.63899	0.23063	0.56831	0.89972	0.047204	0.12659	0.0027866	0.7054	0.36939	0.27312	0.1025	0.65083	0.038489	0.86803	0.11875	0.057405	0.78949	0.63177	0.22658	0.15543	0.43565	0.49171	0.27383	0.50139	0.93981	0.58914	0.29248	0.42964	0.18691	0.2286	0.98795
Transcriptomics	LOC283914	0.49816	0.05383	0.020065	0.63382	0.77013	0.51117	0.80896	0.33731	0.63538	0.84206	0.14632	0.52928	0.060985	0.59616	0.47894	0.21489	0.20327	0.79337	0.85219	0.45703	0.52606	0.31192	0.84036	0.0040935	0.23268	0.12928	0.86244	0.16714	0.98379	0.23474	0.55461	0.35581	0.61386	0.075387	0.1834	0.05383	0.17315	0.22258	0.39173	0.94381	0.40898	0.21862	0.67189	0.35046	0.50464	0.065923	0.40608	0.46012
Transcriptomics	HOXA13	0.015499	0.49493	0.073593	0.77116	0.73564	0.074486	0.67189	0.13903	0.28775	0.43799	0.87993	0.19453	0.12813	0.058886	0.066743	0.0072353	0.69416	0.4417	0.80896	0.35313	0.68064	0.57522	0.21278	0.0042661	0.7054	0.00047123	0.23166	0.0030502	0.29533	0.071832	0.026454	0.97189	0.11623	0.016018	0.0044446	0.0033876	0.0010486	0.024534	0.026454	0.27383	0.067571	0.011419	0.069252	0.11875	0.26258	0.055239	0.65354	0.2368
Transcriptomics	SMC2	0.012451	0.76243	0.0081184	0.26047	0.0059939	0.13761	0.14047	0.73564	0.0057644	0.98379	0.85219	0.91545	0.27829	0.24947	0.050431	0.0062219	0.13064	0.047204	0.20704	0.36939	0.76639	0.42368	0.64989	0.046578	0.93981	0.00031685	0.39744	0.26549	0.048169	0.019134	0.095223	0.14781	0.024909	0.0026659	0.00092026	0.0049186	0.012451	0.017099	0.063509	0.09202	0.014746	0.00032699	0.0022776	0.046578	0.059638	0.06511	0.16013	0.0066009
Transcriptomics	GLTP	0.059638	0.60321	0.12793	0.797	0.21278	0.25816	0.79337	0.52105	0.05177	0.25376	0.58216	0.64188	0.064623	0.028076	0.34517	0.13866	0.40319	0.74326	0.71292	0.57522	0.64493	0.59968	0.68671	0.016283	0.58565	0.024534	0.62981	0.069399	0.92552	0.037958	0.21471	0.33472	0.24733	0.17822	0.032485	0.11374	0.17822	0.47894	0.64625	0.25597	0.47578	0.05383	0.13903	0.81287	0.26929	0.0047242	0.98795	0.3021
Transcriptomics	PAIP1	0.038489	0.1334	0.13761	0.42025	0.40608	0.72425	0.42666	0.27612	0.36121	0.93198	0.15235	0.13761	0.0035593	0.0019836	0.13761	0.055863	0.9198	0.57522	0.93981	0.29248	0.96434	0.47578	0.58216	0.19588	0.20894	0.10302	0.33619	0.07866	0.25738	0.037431	0.30698	0.84036	0.14192	0.093079	0.3585	0.31192	0.15855	0.16655	0.3144	0.71669	0.14337	0.22457	0.40319	0.43264	0.3021	0.11129	0.82071	0.46948
Transcriptomics	SCNN1G	0.2452	0.13064	0.0087374	0.23631	0.53101	0.9759	0.094146	0.037958	0.97992	0.39938	0.053136	0.0094824	5.8532e-06	0.026454	0.66086	0.32893	0.42666	0.36392	0.88789	0.65719	0.72312	0.66821	0.21862	0.03391	0.7054	0.0087374	0.21365	0.099907	0.33223	0.0069892	0.4885	0.97992	0.87596	0.1065	0.29968	0.061938	0.070104	0.053136	0.25816	0.64625	0.11251	0.089931	0.32701	0.41483	0.74326	0.78173	0.86803	0.083878
Transcriptomics	ANXA13	0.70915	0.3749	0.065923	0.65403	0.14192	0.89585	0.65719	0.60675	0.42666	0.3854	0.093079	0.36608	0.017736	0.46948	0.18166	0.26328	0.06511	0.057405	0.2368	0.72047	0.60995	0.98795	0.65719	0.10533	0.73945	0.037431	0.75406	0.4269	0.025867	0.11008	0.51117	0.99598	0.0047242	0.009227	0.012451	0.014261	0.037431	0.0085791	0.039027	0.059638	0.0018059	0.001076	0.0031762	0.0061114	0.17652	0.63538	0.096309	0.0078228
Transcriptomics	PAIP2	0.16493	0.020383	0.078141	0.36915	0.48531	0.58216	0.094146	0.040121	0.75091	0.27595	0.076297	0.013763	0.0035593	0.0061114	0.54782	0.34388	0.66453	0.46012	0.54444	0.40031	0.83569	0.21862	0.15698	0.20704	0.10075	0.54782	0.085328	0.14253	0.4041	0.0095658	0.52105	0.95584	0.90781	0.32956	0.89585	0.5079	0.20141	0.61742	0.45703	0.99598	0.58216	0.95584	0.81287	0.75858	0.77399	0.29011	0.25162	0.64989
Transcriptomics	TARP	0.0064756	0.27156	0.0059939	0.92876	0.25379	0.041807	0.77013	0.043548	0.20894	0.95139	0.24947	0.27829	0.0074528	0.0040095	0.42964	0.036432	0.50139	0.50139	0.74709	0.4478	0.89328	0.22658	0.73945	0.0030416	0.77786	0.010645	0.93321	0.012698	0.34945	0.0011916	0.12394	0.54107	0.92379	0.11749	0.070964	0.027255	0.028917	0.16013	0.29248	0.71292	0.53771	0.098508	0.2854	0.86803	0.99197	0.05383	0.75091	0.10417
Transcriptomics	HS3ST1	0.10533	0.37214	0.2648	0.50357	0.36392	0.037958	0.79726	0.82463	0.35581	0.44294	0.2854	0.16714	0.17467	0.041239	0.10075	0.48155	0.9759	0.75091	0.95183	0.29487	0.86761	0.52105	0.88789	0.00070261	0.18868	0.037958	0.75406	0.058361	0.51529	0.0889	0.096309	0.9318	0.16171	0.025672	0.014024	0.045347	0.011619	0.081931	0.13619	0.621	0.3021	0.14632	0.29011	0.48212	0.19406	0.0059939	0.9358	0.64989
Transcriptomics	GLUD1P2	0.29011	0.013331	0.11749	0.46094	1	0.43565	0.4119	0.083878	0.89585	0.9773	0.0062308	0.30779	0.10382	0.018832	0.72804	0.3002	0.59616	0.21666	0.069252	0.95183	0.83569	0.029345	0.80506	0.078141	0.047836	0.68671	0.56322	0.0256	0.88043	0.075387	0.17652	0.099622	0.78561	0.49493	0.91181	0.65354	0.76628	0.90781	0.683	0.683	0.89585	0.97992	0.60321	0.66821	0.73184	0.028076	0.16655	0.74709
Transcriptomics	CYP17A1	0.621	0.12003	0.10075	0.039702	0.68671	0.10888	0.13201	0.13619	0.47894	0.18221	0.0073962	0.00041129	0.0016715	0.035385	0.3021	0.80281	0.75858	0.71292	0.71292	0.15543	0.15469	0.056676	0.028076	0.0078228	0.38046	0.080971	0.12813	0.0023373	0.21606	0.012451	0.12003	0.71669	0.77786	0.16655	0.24308	0.05177	0.016018	0.034888	0.084865	0.99197	0.3889	0.44474	0.72047	0.61386	0.87596	0.76243	0.43565	0.70915
Transcriptomics	BZW1	0.31192	0.73184	0.16171	0.18442	0.4885	0.47578	0.47578	0.59265	0.9759	0.72312	0.16493	0.10649	0.045788	0.013106	0.6979	0.47702	0.60675	0.6979	0.80896	0.88391	0.50995	0.11623	0.56487	0.045959	0.37768	0.35581	0.63382	0.096102	0.79772	0.29011	0.16013	0.54107	0.94782	0.80506	0.59265	0.40898	0.27156	0.47894	0.47263	0.97992	0.56831	0.58216	0.71669	0.70915	0.83642	0.14632	0.41777	0.86406
Transcriptomics	CTD-2286N8.2	0.15082	0.96386	0.20515	0.7202	0.0041791	0.68671	0.94381	0.9759	0.039571	0.13249	0.20894	0.34205	0.35696	0.18868	0.32956	0.23528	0.42072	0.12659	0.69416	0.21666	0.15731	0.69043	0.25379	0.05383	0.17483	0.00021396	0.046506	0.071383	0.031069	0.055954	0.073593	0.38607	0.021032	0.020383	0.00030696	0.0054341	0.013106	0.012238	0.059638	0.044741	0.017099	0.0003703	0.001285	0.054531	0.14781	0.54444	0.016283	0.0017636
Transcriptomics	TAF11	0.16655	0.62817	0.3169	0.22479	0.9158	0.45703	0.30698	0.33731	0.37214	0.4041	0.16171	0.013222	0.00025541	0.00089623	0.12132	0.13246	0.59616	0.7054	0.90781	0.15698	0.78515	0.31192	0.17315	0.1834	0.55802	0.093079	0.086478	0.022177	0.071597	0.017099	0.27383	0.9759	0.67559	0.33731	0.36665	0.36665	0.11875	0.40319	0.33992	0.50464	0.4119	0.3585	0.49493	0.86803	0.89984	0.11251	0.46948	0.69416
Transcriptomics	GZMB	0.016551	0.4119	0.026454	0.54425	0.23063	0.10533	0.61386	0.069252	0.13903	0.24309	0.44474	0.13761	0.022177	0.045347	0.69043	0.10097	0.42368	0.50464	0.82855	0.57869	0.95139	0.33472	0.60321	0.0020303	0.49171	0.0066009	0.41366	0.048714	0.30331	0.0036106	0.38326	0.80116	0.76628	0.13619	0.031561	0.040677	0.029345	0.2854	0.32193	0.53101	0.67929	0.10188	0.30944	0.77399	0.77013	0.14931	0.53435	0.11498
Transcriptomics	EZR	0.69043	0.71669	0.6103	0.2888	0.16013	0.26929	0.28073	0.25597	0.074486	0.65676	0.21666	0.86684	0.56705	0.024534	0.47894	0.73178	0.86406	0.09202	0.12526	0.54444	0.68666	0.19955	0.56144	0.38607	0.75858	0.19406	0.88889	0.76688	0.77263	0.30944	0.8443	0.080971	0.067571	0.21862	0.29011	0.35046	0.91181	0.41483	0.62458	0.3144	0.16655	0.25162	0.22059	0.063509	0.18868	0.47894	0.042381	0.15388
Transcriptomics	RNF213	0.45703	0.12132	0.11623	0.64188	0.78173	0.48531	0.66821	0.10888	0.96386	0.86121	0.034888	0.29415	0.014609	0.03202	0.99598	0.33636	0.36939	0.73564	0.52436	0.7054	0.48363	0.24098	0.74326	0.011419	0.56144	0.36121	0.80133	0.28615	0.2396	0.032954	0.84825	0.21278	0.90382	0.40608	0.3749	0.28073	0.21278	0.67559	0.65354	0.92779	0.89187	0.33731	0.78173	0.58914	0.73184	0.17652	0.62458	0.52436
Transcriptomics	RP11-403N16.3	0.20141	0.61386	0.087878	0.6581	0.85615	0.19588	0.98795	0.72804	0.47263	0.41364	0.43867	0.2093	0.0062134	0.59968	0.015244	0.10783	0.034396	0.11129	0.43867	0.24098	0.74158	0.87199	1	0.12003	0.35313	0.0084232	0.716	0.088814	0.3808	0.15235	0.52105	0.75475	0.29487	0.020383	0.0062308	0.0051196	0.010645	0.010645	0.041239	0.021363	0.032954	0.0081184	0.011619	0.11875	0.4885	0.32193	0.26036	0.031107
Transcriptomics	PNKD	0.029345	0.094146	0.1065	0.39424	0.60675	0.25162	0.74709	0.075387	0.67559	0.49408	0.84036	0.69513	0.11338	0.041239	0.32701	0.13657	0.94381	1	0.47894	0.37214	0.93198	0.621	0.78949	0.0032454	0.27842	0.074486	0.87565	0.08306	0.6627	0.15235	0.50464	0.40608	0.85615	0.057405	0.18515	0.080019	0.067571	0.094146	0.29727	0.41483	0.73945	0.52436	0.9759	0.82855	0.6103	0.0066009	0.3144	0.88391
Transcriptomics	---	0.12928	0.85615	0.12526	0.80566	0.22658	0.32701	0.67929	0.34781	0.41483	0.91906	0.76243	0.22935	0.1206	0.34781	0.85615	0.07528	0.18166	0.12793	0.57176	0.84036	0.92552	0.87596	0.83642	0.0035349	0.81287	0.00012545	0.797	0.071383	0.81033	0.17483	0.2854	0.5079	0.32446	0.17483	0.010093	0.039571	0.053136	0.15388	0.40319	0.14632	0.20141	0.0035349	0.044741	0.21862	0.24947	0.33731	0.54444	0.020065
Transcriptomics	HECTD1	0.17652	0.12928	0.0084232	0.8274	0.41483	0.20894	0.75475	0.089931	0.90781	0.61573	0.093079	0.21146	0.011226	0.13479	0.99598	0.12065	0.3585	0.38326	0.8443	0.9158	0.76017	0.80116	0.8601	0.0028486	0.26929	0.018533	0.91545	0.136	0.79143	0.013331	0.49171	0.46635	0.8601	0.10888	0.23888	0.06511	0.066743	0.16331	0.36392	0.89984	0.36121	0.15388	0.52768	0.56831	0.61386	0.17994	0.7054	0.19226
Transcriptomics	LOC100128993	0.23888	0.74709	0.27383	0.2434	0.57869	0.4119	0.041807	0.017378	0.89984	0.64493	0.27156	0.2093	0.0071254	0.0072584	0.98393	0.22934	0.73564	0.4478	0.53101	0.11623	0.73541	0.2368	0.48212	0.050431	0.84825	0.30944	0.27056	0.2482	0.13963	0.02238	0.89585	0.59265	0.95584	0.090971	0.60321	0.27383	0.080019	0.15082	0.18166	0.67559	0.34254	0.7054	0.86803	0.87199	0.69416	0.16331	0.16983	0.80896
Transcriptomics	---	0.41777	0.16013	0.17652	0.77116	0.70915	0.56487	0.69416	0.52436	0.46635	0.34078	0.85615	0.35998	0.0062134	0.49171	0.069252	0.28984	0.14484	0.31941	0.47263	0.57869	0.328	0.77399	0.85219	0.011221	0.29968	0.05177	0.78836	0.2482	0.64493	0.21278	0.74709	0.46012	0.64989	0.027663	0.057405	0.028494	0.030216	0.080019	0.099622	0.82855	0.35313	0.17822	0.43565	0.50139	0.78949	0.034888	0.58565	0.48531
Transcriptomics	ID2	0.1065	0.69043	0.1334	0.57474	0.36121	0.38326	0.85615	0.42368	0.32193	0.74158	0.8601	0.10515	0.0043466	0.13619	0.62817	0.3216	0.21862	0.36939	0.94782	0.64989	0.48884	0.70165	0.54107	0.010645	0.57869	0.013106	0.7626	0.093626	0.77888	0.15543	0.64625	0.97992	0.57869	0.067571	0.030216	0.096309	0.14484	0.15855	0.621	0.2854	0.52105	0.094146	0.30454	0.89984	0.65719	0.097404	0.33213	0.086865
Transcriptomics	ITIH6	0.96788	0.1334	0.82855	0.78836	0.20141	0.24308	0.51446	0.14931	0.21862	0.84843	0.067571	0.73707	0.33619	0.065923	0.59616	0.97725	0.26704	0.11008	0.24733	0.80506	0.21606	0.21085	0.69416	0.65354	0.020065	0.19046	0.81434	0.73707	0.68064	0.96788	0.51446	0.080019	0.54444	0.81679	0.12132	0.31941	0.59968	0.29727	0.57176	0.041807	0.3585	0.067571	0.025672	0.24947	0.41777	0.061938	0.015499	0.070104
Transcriptomics	RP11-546D6.3	0.086865	0.6979	0.031561	0.29685	0.36392	0.11251	0.25379	0.13619	0.25162	0.18513	0.17652	0.038439	0.00021075	0.044142	0.09202	0.0024542	0.14484	0.24947	0.9759	0.047836	0.19713	0.081931	0.12928	0.0889	0.40319	0.0034606	0.18442	0.00039694	0.071597	0.0040935	0.11374	0.78173	0.52436	0.032954	0.12003	0.04912	0.075387	0.020383	0.21085	0.37768	0.099622	0.061164	0.20141	0.25379	0.47894	0.46948	0.9318	0.058142
Transcriptomics	MOGS	0.71292	0.061164	0.28775	0.169	0.048475	0.99598	0.0889	0.042962	0.037958	0.93198	0.033429	0.026987	0.096102	0.077215	0.37214	0.6114	0.33472	0.2648	0.20515	0.38046	0.85481	0.047836	0.83248	0.19406	0.02308	0.87993	0.99108	0.10515	0.45799	0.75475	0.35046	0.20894	0.86803	0.94782	0.35313	0.81679	0.97189	0.87199	0.69043	0.40319	0.98795	0.47894	0.18166	0.96386	0.95584	0.46323	0.055954	0.3749
Transcriptomics	ARID4B /// RBM34	0.12132	0.41483	0.18868	0.097358	0.98795	0.67189	0.78173	0.97992	0.27842	0.17364	0.86803	0.3218	0.039067	0.034396	0.072709	0.37494	0.78561	0.84825	0.78949	0.21085	0.52606	0.59968	0.63899	0.26704	0.13201	0.26704	0.73707	0.12508	0.72312	0.26258	0.2368	0.92379	0.20515	0.077215	0.23063	0.2452	0.26258	0.21862	0.35046	0.45703	0.15082	0.38607	0.36665	0.30698	0.15698	0.0027866	0.69043	0.9318
Transcriptomics	TARP /// TRGC2	0.013789	0.17148	0.0073962	0.7202	0.41483	0.075387	0.50139	0.046578	0.29248	0.2002	0.22457	0.13761	0.023415	0.028917	0.42964	0.038017	0.39458	0.63538	0.86803	0.64989	0.62153	0.10188	0.20704	0.0058782	0.46323	0.026454	0.22706	0.028433	0.26471	0.0026073	0.24098	0.81679	0.89984	0.19771	0.095223	0.050431	0.040121	0.22658	0.29011	0.60321	0.56831	0.14781	0.35046	0.93981	0.76243	0.26258	0.71669	0.13619
Transcriptomics	ACAA1	0.01975	0.28306	0.063509	0.74981	0.15388	0.13064	0.57522	0.97189	0.014993	0.65676	0.73945	0.19453	0.016112	0.15388	0.03391	0.091267	0.43867	0.24733	0.80506	0.71292	0.44793	0.38326	0.683	0.17148	0.78561	0.067571	0.90658	0.031508	0.95139	0.077215	0.26258	0.98393	0.52436	0.35313	0.2452	0.42964	0.59616	0.78949	0.81287	0.42666	0.89187	0.37768	0.48212	0.76243	0.35046	0.034396	0.53771	0.25162
Transcriptomics	RGMB-AS1	0.11701	0.51431	0.11959	0.94875	0.92249	0.038478	0.89677	0.65257	0.51105	0.22404	0.89085	0.18928	0.058701	0.27959	0.094994	0.21895	0.44029	0.72274	0.60787	0.23871	0.81023	0.55597	0.28426	0.041903	0.42531	0.17593	0.48544	0.15435	0.56434	0.090137	0.46951	0.9463	0.32206	0.034005	0.11765	0.13957	0.073895	0.23558	0.26476	0.46951	0.28426	0.39191	0.49166	0.53412	0.20667	0.01571	0.98209	0.69475
Transcriptomics	NDUFV1	0.42072	0.083878	0.068408	0.51819	0.59265	0.96788	0.42072	0.039571	0.99197	0.87401	0.16655	0.63784	0.034839	0.23474	0.66821	0.25688	0.6979	0.84825	0.81287	0.34517	0.27595	0.35581	0.96788	0.14337	0.17822	0.73945	0.91545	0.46792	0.72312	0.19046	0.71292	0.087878	0.46635	0.8443	0.56487	0.70915	0.79337	0.82463	0.96386	0.2648	0.79337	0.80506	0.37214	0.63177	0.73945	0.2854	0.094146	0.79726
Transcriptomics	MTMR10	0.13201	0.59265	0.38326	0.56705	0.78561	0.31192	0.2368	0.062719	0.99197	0.31965	0.78949	0.64997	0.23166	0.058886	0.55121	0.021123	0.38046	0.69416	0.2854	0.35313	0.9773	0.97189	0.72804	0.14337	0.80896	0.14484	0.62981	0.36915	0.89328	0.10075	0.89585	0.12262	0.60675	0.5079	0.62458	0.50139	0.35046	0.55121	0.81679	0.85615	0.54782	0.30944	0.57522	0.87199	0.33472	0.040121	0.16983	0.6979
Transcriptomics	CCNY	0.17822	0.53435	0.018832	0.89773	0.64625	0.40319	0.22059	0.60321	0.21471	0.19107	0.87199	0.22935	0.0086977	0.24098	0.063509	0.30724	0.0889	0.12928	0.49816	0.83642	0.48884	0.36939	0.38326	0.028917	0.90382	0.071832	0.33911	0.098627	0.47844	0.35581	0.18515	0.69416	0.086865	0.011823	0.013789	0.012666	0.061938	0.025672	0.1065	0.21666	0.071832	0.044741	0.076297	0.11374	0.54107	0.028076	0.27842	0.066743
Transcriptomics	GTDC1	0.17148	0.20704	0.058886	0.89331	0.98393	0.070964	0.79337	0.070964	0.84825	0.3808	0.2648	0.14757	0.028433	0.042381	0.36392	0.072612	0.35313	0.75475	0.4417	0.75858	0.67464	0.15082	0.17822	0.00072222	0.67559	0.05177	0.34797	0.0149	0.34078	0.037431	0.19046	0.54444	0.96386	0.10302	0.081931	0.050431	0.037431	0.2286	0.32701	0.83248	0.76628	0.20515	0.70165	0.91181	0.93981	0.044142	0.25816	0.57869
Transcriptomics	TRMU	0.016551	0.53101	0.012029	0.91545	0.072709	0.22457	0.67189	0.6103	0.087878	0.57014	0.43565	0.1442	0.023415	0.05177	0.026061	0.009133	0.16493	0.010834	0.16983	0.25379	0.43799	0.92379	0.85219	0.26929	0.71292	0.0046294	0.76688	0.057505	0.20645	0.013106	0.06511	0.62458	0.023437	0.095223	0.028494	0.089931	0.094146	0.080971	0.22059	0.026852	0.014024	0.0031762	0.0021758	0.047836	0.059638	0.25597	0.11251	0.0053275
Transcriptomics	ADRA1D	0.29968	0.29968	0.083878	0.49633	0.16655	0.38046	0.4478	0.73184	0.11498	0.27976	0.21862	0.086478	0.00075671	0.13903	0.056676	0.046756	0.050431	0.24098	0.64989	0.73564	0.53693	0.25597	0.35313	0.0076784	0.82855	0.013558	0.46792	0.015496	0.064385	0.047204	0.41777	0.80506	0.16331	0.032485	0.009227	0.030216	0.058142	0.11623	0.25379	0.26704	0.40608	0.026061	0.16331	0.71292	0.94782	0.14047	0.68671	0.055239
Transcriptomics	HTR1B	0.25043	0.87902	0.11073	0.20077	0.86329	0.27154	0.69475	0.62738	0.46639	0.29139	0.14547	0.036536	0.0051929	0.015845	0.11258	0.17871	0.32206	0.2704	0.56619	0.11258	0.70481	0.32206	0.8574	0.42531	0.20194	0.24187	0.87341	0.081836	0.35384	0.029726	0.1374	0.96418	0.23976	0.32206	0.42679	0.54752	0.39333	0.38908	0.52913	0.2335	0.12691	0.30097	0.20194	0.31452	0.18818	0.097775	0.99204	0.42977
Transcriptomics	ERLEC1	0.094146	0.10533	0.0016026	0.8274	0.30454	0.58565	0.83248	0.78561	0.56487	0.49934	0.20894	0.10515	0.084188	0.3144	0.64625	0.13451	0.4885	0.037958	0.30454	0.46012	0.59275	0.75091	0.4119	0.18868	0.74709	0.014261	0.42025	0.32751	0.3627	0.29011	0.11623	0.21862	0.05245	0.055954	0.095223	0.028494	0.080019	0.026061	0.098508	0.22258	0.0037659	0.010458	0.026454	0.0053275	0.17315	0.92379	0.095223	0.0049186
Transcriptomics	ALX4	0.42368	0.13064	0.05177	0.89331	0.59265	0.20704	0.58914	0.72804	0.89187	0.27976	0.081931	0.40066	0.094858	0.095223	0.54782	0.64721	0.51446	0.77399	0.91181	0.95183	0.93845	0.47578	0.83642	0.0017636	0.13761	0.3585	0.77116	0.42357	0.39469	0.066743	0.46012	0.71669	0.41483	0.074486	0.1065	0.061164	0.043548	0.11875	0.13761	0.9198	0.38607	0.25379	0.46323	0.54107	0.69043	0.076297	0.99598	0.60675
Transcriptomics	SLX1A-SULT1A3 /// SLX1B-SULT1A4	0.012238	0.55802	0.053136	0.5594	0.18691	0.033429	0.77399	0.24947	0.023798	0.59846	0.38607	0.2482	0.025151	0.051097	0.010834	0.0072353	0.6979	0.34781	0.80506	0.18166	0.48884	0.28073	0.49493	0.067571	0.99598	0.00038184	0.2757	0.00015324	0.12561	0.02308	0.0045362	0.94381	0.090971	0.013789	0.028076	0.014746	0.027663	0.041807	0.16983	0.21278	0.055954	0.016823	0.072709	0.17148	0.16983	0.047836	0.97992	0.10888
Transcriptomics	GLRX5	0.41777	0.086865	0.10188	0.77116	0.4119	0.65719	0.081931	0.0054341	0.65719	0.64493	0.2452	0.26297	0.0055291	0.14931	0.80506	0.54232	0.59616	0.5079	0.40319	0.77013	0.66866	0.24947	0.39458	0.062719	0.98393	0.56831	0.39105	0.44375	0.67464	0.08586	0.621	0.38046	0.24098	0.52105	0.89984	0.34517	0.26036	0.49171	0.51446	0.50139	0.95584	0.9759	0.51775	0.55461	0.66453	0.63177	0.25379	0.89585
Transcriptomics	C3orf52	0.83642	0.0069892	0.030659	0.5786	0.50139	0.69416	0.32956	0.3585	0.79726	0.28361	0.089931	0.026987	0.0047914	0.55121	0.49816	0.48155	0.10888	0.82463	0.61742	0.78561	0.47844	0.25597	0.10533	0.061938	0.70165	0.13903	0.136	0.092405	0.79143	0.028494	0.77399	0.52436	0.46635	0.13761	0.10075	0.12659	0.35581	0.16655	0.7054	0.15855	0.39458	0.073593	0.25162	0.45703	0.50464	0.87993	0.76628	0.13479
Transcriptomics	FGF18	0.40319	0.033429	0.053136	0.19867	0.84036	0.3021	0.32701	0.17822	0.99197	0.45295	0.044741	0.08306	0.0019263	0.062719	0.35313	0.34011	0.36939	0.95584	0.18691	0.80506	0.88685	0.13201	0.63177	0.026454	0.31192	0.10417	0.62981	0.0085101	0.81665	0.042962	0.20894	0.12262	0.95183	0.33992	0.26258	0.16331	0.33992	0.39744	0.9198	0.4119	0.6103	0.20515	0.46323	0.87993	0.7054	0.10075	0.57522	0.37768
Transcriptomics	---	0.57176	0.71669	0.0079694	0.77975	0.013331	0.38046	0.20515	0.3169	0.21471	0.99027	0.19046	0.21365	0.067458	0.37768	0.90382	0.36703	0.045959	0.0049186	0.23063	0.95584	0.73541	0.81679	0.53435	0.023798	0.6979	0.0013174	0.86244	0.25063	0.061657	0.072709	0.048475	0.16331	0.20894	0.038489	0.0073962	0.0078228	0.05245	0.0042661	0.12262	0.16655	0.02308	0.00049974	0.0040935	0.029345	0.51446	0.98393	0.033429	0.00027882
Transcriptomics	---	0.63538	0.86803	0.1334	0.8274	0.40898	0.54107	0.31941	0.43867	0.78949	0.77263	0.17994	0.11913	0.028928	0.18166	0.98393	0.078019	0.04912	0.038489	0.10888	0.2452	0.20331	0.78949	0.12659	0.0053275	0.92379	0.0043546	0.31335	0.3218	0.09681	0.021032	0.89984	0.45703	0.621	0.12262	0.041807	0.028076	0.0057644	0.0073962	0.017378	0.59968	0.051097	0.011221	0.05383	0.050431	0.5079	0.77013	0.95584	0.055954
Transcriptomics	C20orf24 /// TGIF2-C20orf24	0.24733	0.55121	0.0889	0.98663	0.3021	0.23474	0.25379	0.73184	0.38046	0.48363	0.24947	0.29147	0.01349	0.028076	0.22658	0.28984	0.19226	0.3144	0.76628	0.51117	0.36718	0.66453	0.87596	0.00026992	0.60321	0.021032	0.67447	0.085328	0.15211	0.068408	0.3169	0.92379	0.55121	0.018239	0.010275	0.0088982	0.0061114	0.044741	0.070964	0.78561	0.33213	0.071832	0.23063	0.71292	0.79726	0.0045362	0.79337	0.16013
Transcriptomics	ARPC5L	0.0050183	0.23268	0.0043546	0.7202	0.16493	0.067571	0.63177	0.2648	0.027255	0.45295	0.072709	0.06188	0.028928	0.071832	0.17822	0.054789	0.93981	0.41777	0.67559	0.21666	0.21933	0.32701	0.9318	0.26704	0.53435	0.012029	0.28615	0.019857	0.20963	0.00047123	0.041239	0.35313	0.26704	0.080019	0.30698	0.1834	0.15235	0.54107	0.55121	0.31941	0.11129	0.23888	0.26704	0.54107	0.047204	0.065923	0.46012	0.17315
Transcriptomics	NPAS2	0.0094883	0.30955	0.003391	0.028869	0.48528	0.1667	0.30341	0.037657	0.44941	0.64181	0.63096	0.26407	0.036237	0.011952	0.26252	0.036432	0.76632	0.70963	0.51431	0.019074	0.15577	0.42234	0.12488	0.0049624	0.96816	0.00062103	0.10704	0.0054454	0.4808	0.0077562	0.025088	0.5492	0.51923	0.00013411	0.010613	0.0001519	0.00050525	5.1615e-05	0.0062304	0.70218	0.010811	0.028836	0.1151	0.040448	0.21537	0.031808	0.8203	0.17085
Transcriptomics	---	0.13619	0.040121	0.027663	0.58248	0.37768	0.42368	0.91181	0.46635	0.3169	0.97082	0.18868	0.092405	0.018077	0.25816	0.28775	0.25372	0.46323	0.70165	0.79726	0.52436	0.65676	0.53435	0.78561	0.061938	0.48212	0.044741	0.71181	0.1266	0.50463	0.096309	0.25597	0.75091	0.17315	0.10302	0.11374	0.14781	0.23888	0.52436	0.81679	0.12659	0.23268	0.074486	0.21471	0.60675	0.21471	0.09202	0.4119	0.12132
Transcriptomics	LOC100506206	0.61742	0.9358	0.21278	0.2482	0.92379	0.33992	0.49493	0.51446	0.75858	0.53693	0.31192	0.086478	0.00068615	0.17148	0.42666	0.12646	0.046578	0.60675	0.52768	0.87199	0.43306	0.1334	0.77786	0.08586	0.67189	0.086865	0.69929	0.018422	0.61573	0.24947	0.38607	0.28073	0.86803	0.38326	0.31192	0.35046	0.58216	0.43867	0.89984	0.21862	0.4885	0.18166	0.42368	0.76243	0.74709	0.16171	0.85219	0.17148
Transcriptomics	BBX	0.28306	0.36121	0.3169	0.070386	0.40608	0.70915	0.11374	0.17483	0.64625	0.51529	0.37768	0.002037	0.0013231	0.053136	0.92779	0.17273	0.97189	0.58914	0.64989	0.43867	0.27217	0.24098	0.47578	0.18868	0.34517	0.068408	0.51085	0.01949	0.81665	0.88391	0.20704	0.64989	0.53101	0.59265	0.77013	0.71292	0.64625	0.5079	0.89187	0.57869	0.40608	0.3889	0.92779	0.46635	0.621	0.57522	0.42964	0.50139
Transcriptomics	TARP /// TRGC2	0.03202	0.36121	0.016551	0.61387	0.28775	0.19226	0.85615	0.069252	0.2648	0.62735	0.24733	0.3218	0.0096874	0.012029	0.68671	0.060315	0.21862	0.48531	0.9198	0.75858	0.79143	0.14632	0.65354	0.00070261	0.44474	0.01975	0.83614	0.040997	0.28361	0.0075362	0.39744	0.3585	0.85219	0.14484	0.039571	0.028494	0.035888	0.18691	0.27842	0.74326	0.6979	0.0889	0.31941	0.81287	0.74326	0.089931	0.67189	0.074486
Transcriptomics	---	0.34781	0.41777	0.15855	0.7202	0.59616	0.54107	0.40608	0.27612	0.34517	0.88685	0.026454	0.12813	0.47847	0.051097	0.32193	0.40335	0.52768	0.81679	0.91181	0.88391	0.52606	0.25597	0.74326	0.36665	0.032954	0.9158	0.74556	0.38472	0.7109	0.12793	0.36121	0.56831	0.4885	0.67559	0.29011	0.49816	0.92379	0.4478	0.56487	0.29487	0.8443	0.41483	0.32446	0.75858	0.61386	0.31941	0.16493	0.62458
Transcriptomics	---	0.9358	0.44474	0.51775	0.56322	0.96386	0.70165	0.71292	0.45086	0.87993	0.81665	0.0027257	0.1206	0.010767	0.031107	0.58914	0.97725	0.56831	0.68671	0.4478	0.95584	0.34945	0.21085	0.77013	0.033429	0.33472	0.3749	0.40066	0.25306	0.074643	0.14192	0.51446	0.60321	0.9759	0.36121	0.54444	0.30454	0.14632	0.59265	0.39173	0.93981	0.54444	0.6103	0.90781	0.79726	0.84825	0.044142	0.41483	0.95584
Transcriptomics	NXF1	0.083878	0.094146	0.011221	0.31056	0.43565	0.41777	0.2286	0.4119	0.64625	0.37169	0.4119	0.15983	0.0086977	0.074486	0.096309	0.021637	0.40898	0.96386	0.44474	0.79726	0.73541	0.011419	0.88789	0.683	0.64625	0.59616	0.75833	0.015496	0.98379	0.12928	0.079076	0.4417	0.06511	0.29487	0.53771	0.42666	0.8443	0.43264	0.87596	0.089931	0.12659	0.23474	0.25379	0.1834	0.16013	0.30454	0.88789	0.41483
Transcriptomics	---	0.8601	0.33213	0.20515	0.23397	0.53771	0.8443	0.45086	0.77399	0.56831	0.94492	0.037958	0.0021529	0.00050707	0.10302	0.9198	0.70498	0.25597	0.45086	0.96386	0.64262	0.45799	0.077215	0.55802	0.036397	0.22059	0.26929	0.81434	0.027463	0.76017	0.42072	0.40031	0.25597	0.51446	0.53771	0.36939	0.39173	0.48212	0.39744	0.73184	0.60675	0.59616	0.35046	0.71669	0.55461	0.82855	0.59968	0.58216	0.46323
Transcriptomics	TMEM129	0.0022262	0.36939	0.040121	0.61387	0.047836	0.17822	0.33472	0.97189	0.0067283	0.15211	0.8443	0.84927	0.25799	0.055954	0.064306	0.29327	0.75858	0.31192	0.6103	0.26036	0.99027	0.89585	0.25597	0.036911	0.89984	0.072709	0.80133	0.41366	0.69874	0.045959	0.33992	0.59616	0.14047	0.025288	0.017378	0.037431	0.047204	0.11129	0.14632	0.54782	0.24308	0.1334	0.11129	0.55461	0.16818	0.0020303	0.12793	0.20704
Transcriptomics	HOXD9	0.38326	0.21666	0.13201	0.85366	0.81679	0.29727	0.75475	0.30698	0.82071	0.65676	0.036911	0.25552	0.14088	0.082901	0.84036	0.64204	0.62817	0.55802	0.75475	0.97189	0.62735	0.18515	0.87199	0.00010777	0.4417	0.17652	0.92876	0.18842	0.42816	0.11498	0.5079	0.19226	0.4885	0.18868	0.071832	0.035888	0.012666	0.090971	0.061164	0.78561	0.4417	0.22059	0.4478	0.45703	0.89984	0.26036	1	0.46323
Transcriptomics	ALDH1A3	0.32446	0.017661	0.29968	0.4269	0.3749	0.40898	0.24733	0.066743	0.69416	0.76639	0.41777	0.048714	0.00083334	0.070104	0.38607	0.1245	0.89585	0.78949	0.44474	0.46012	0.12337	0.52436	0.85615	0.25816	0.10769	0.20894	0.71181	0.076527	0.75396	0.70915	0.62817	0.50139	0.17148	0.14192	0.54782	0.36665	0.35313	0.42072	0.65719	0.47578	0.24308	0.29968	0.82855	0.52105	0.76628	0.19771	0.35313	0.76628
Transcriptomics	CD300LG	0.12659	0.71669	0.020705	0.345	0.32701	0.11374	0.72804	0.83248	0.13761	0.76017	0.66086	0.80133	0.19044	0.2648	0.12003	0.032692	0.0085791	0.30454	0.59968	0.64989	0.63905	0.25379	0.48531	0.099622	0.33731	0.19226	0.48202	0.36303	0.53148	0.020065	0.47894	0.6103	0.40319	0.4885	0.061938	0.15698	0.26929	0.42368	0.45086	0.10302	0.3749	0.045959	0.037431	0.49816	0.30454	0.25597	0.46323	0.070104
Transcriptomics	TBX21	0.044142	0.45703	0.014746	0.92876	0.80506	0.02308	0.78173	0.12659	0.683	0.86761	0.57176	0.34205	0.169	0.06511	0.55461	0.20652	0.3749	0.62817	0.99197	0.61386	0.5479	0.27383	0.3144	0.00015078	0.71292	0.036911	0.5518	0.11198	0.40885	0.023437	0.19588	0.95183	0.91181	0.10302	0.036397	0.009227	0.0039269	0.042381	0.054531	0.9198	0.42666	0.14047	0.31941	0.621	0.77013	0.15855	1	0.30944
Transcriptomics	CEP290	0.016551	0.2286	0.14192	0.91102	0.32956	0.081931	0.72047	0.68671	0.078141	0.85481	0.56487	0.054179	0.02943	0.076297	0.021363	0.048674	0.82463	0.32956	0.72425	0.39744	0.91906	0.51446	0.99598	0.19226	0.29248	0.021363	0.56705	0.0072876	0.84843	0.035385	0.089931	0.72804	0.097404	0.29968	0.11498	0.36392	0.2854	0.6979	0.87596	0.10888	0.42368	0.12394	0.17652	0.7054	0.10533	0.081931	0.80506	0.32446
Transcriptomics	GDF5	0.79337	0.76243	0.90781	0.94654	0.40898	0.53101	0.3021	0.18166	0.45703	0.99027	0.051097	0.77975	0.16529	0.083878	0.89585	0.4861	0.47894	0.2368	0.16493	0.99598	0.48363	0.054531	0.70165	0.45086	0.99598	0.42368	0.88889	0.38788	0.72312	0.26258	0.683	0.011419	0.12793	0.20704	0.27383	0.38326	0.59968	0.21666	0.34781	0.44474	0.16171	0.35581	0.24947	0.059638	0.24098	0.40031	0.070104	0.4478
Transcriptomics	---	0.32956	0.27612	0.12003	0.062784	0.98795	0.79337	0.50464	0.20141	0.84825	0.75396	0.10188	0.17659	0.0081448	0.0040935	0.71292	0.75889	0.87199	0.99197	0.38607	0.51117	0.86761	0.083878	0.81679	0.00025283	0.72425	0.12003	0.77545	0.05337	0.42329	0.18166	0.20515	0.59265	0.4885	0.017099	0.027663	0.0032454	0.0046294	0.0056525	0.017378	0.86803	0.19771	0.19771	0.42964	0.40898	0.73945	0.03202	0.95584	0.52105
Transcriptomics	PELI2	0.52105	0.8601	0.3749	0.40713	0.85219	0.29487	0.41483	0.45086	0.62458	0.42329	0.12526	0.07239	0.0085101	0.0090613	0.78561	0.31437	0.34254	0.41777	0.78561	0.78949	0.78515	0.40898	0.58914	0.0084232	0.48212	0.20327	0.9688	0.17467	0.2993	0.11008	0.56487	0.24947	0.84825	0.59968	0.3144	0.31192	0.084865	0.20515	0.25597	0.91181	0.55461	0.25816	0.49493	0.78561	0.86803	0.49816	0.57176	0.56487
Transcriptomics	---	0.18166	0.24308	0.05245	0.64592	0.29011	0.2368	0.621	0.80896	0.071832	0.63319	0.15855	0.43697	0.047969	0.16331	0.14931	0.26007	0.24098	0.70165	0.87596	0.92379	0.42329	0.45394	0.77786	0.05177	0.47578	0.098508	0.59809	0.14088	0.59846	0.037958	0.32956	0.81679	0.62817	0.25597	0.17822	0.18691	0.27156	0.80116	0.75475	0.4119	0.54782	0.23474	0.33472	0.95584	0.36121	0.0054341	0.94381	0.35046
Transcriptomics	C7orf55	0.25816	0.94381	0.095223	0.86684	0.45394	0.82071	0.75091	0.28306	0.45703	0.81665	0.72804	0.2809	0.0096874	0.055954	0.73945	0.21207	0.29968	0.75475	0.57869	0.56831	0.30331	0.2286	0.9158	0.023798	0.57176	0.29248	0.99554	0.18244	0.53693	0.17652	0.80506	0.4885	0.78561	0.11875	0.26704	0.11498	0.099622	0.28073	0.13903	0.67929	0.53771	0.64625	0.97189	0.76628	0.81287	0.022037	0.24733	0.96788
Transcriptomics	CACYBP	0.22258	0.79337	0.084865	0.35696	0.042962	0.89585	0.21471	0.47578	0.074486	0.4041	0.19955	0.52928	0.1206	0.3144	0.22258	0.33636	0.33992	0.029345	0.08586	0.67929	0.81033	0.38326	0.3585	0.10075	0.50464	0.0063522	0.92432	0.84489	0.017513	0.20141	0.3749	0.17148	0.011823	0.0029117	0.018832	0.013789	0.010093	0.017948	0.016283	0.27383	0.00068344	0.0068577	0.010645	0.0087374	0.070964	0.062719	0.080019	0.017099
Transcriptomics	RP11-65J3.14	0.046578	0.46323	0.16818	0.15626	0.80506	0.22658	0.035385	0.034888	0.40319	0.58706	0.065923	0.075476	0.012442	0.00096992	0.33731	0.12065	0.6103	0.72804	0.48531	0.084865	0.42329	0.36939	0.44474	0.11875	0.56144	0.02308	0.05023	0.034839	0.050438	0.0028486	0.055954	0.87993	0.16331	0.045347	0.17148	0.070104	0.011026	0.10769	0.075387	0.28775	0.023798	0.093079	0.16013	0.3169	0.14632	0.099622	0.77013	0.57869
Transcriptomics	OR2C1	0.001104	0.01944	0.00066471	0.74131	0.069252	0.41483	0.9158	0.33731	0.023798	0.9773	0.65719	0.32751	0.03542	0.14781	0.032954	0.020619	0.82855	0.48212	0.9158	0.14632	0.2396	0.90382	0.90781	0.57522	0.35313	0.0046294	0.28352	0.052572	0.64493	0.0081184	0.036397	0.087878	0.021363	0.00039367	0.066743	0.022037	0.0889	0.044142	0.22457	0.087878	0.0020303	0.024164	0.035385	0.037958	0.0047242	0.026061	0.21085	0.060397
Transcriptomics	PCNT	0.19406	0.57522	0.009227	0.63382	0.20894	0.89585	0.9318	0.8443	0.15855	0.62735	0.46323	0.1344	0.0012094	0.24308	0.27842	0.14507	0.095223	0.020705	0.42368	0.70915	0.75396	0.74326	0.58565	0.10302	0.66453	0.00044409	0.60991	0.022584	0.19107	0.10417	0.081931	0.94782	0.020705	0.0099149	0.0023834	0.0015644	0.035385	0.0082696	0.08586	0.011823	0.0033159	0.00012082	0.00092026	0.016018	0.42964	0.39458	0.041807	0.00028795
Transcriptomics	CX3CL1	0.10188	0.89984	0.0081184	0.86244	0.45086	0.080019	0.99197	0.60675	0.16331	0.79143	0.56487	0.31056	0.048714	0.29727	0.047836	0.031283	0.041807	0.040677	0.17994	0.074486	0.16263	0.66453	0.46635	0.03391	0.73184	0.0010218	0.61387	0.030455	0.15469	0.0058782	0.12793	0.83642	0.35581	0.027255	0.0059939	0.00094481	0.0022262	0.012238	0.0093951	0.14047	0.020065	0.0064756	0.0076784	0.045347	0.33472	0.17483	0.67559	0.027663
Transcriptomics	---	0.16818	0.031107	0.21471	0.22479	0.72804	0.9358	0.11749	0.0076784	0.92379	0.03028	0.016018	0.014322	0.010324	0.0048206	0.92779	0.8866	0.11374	0.78173	0.55121	0.36939	0.80402	0.095223	0.11498	0.11623	0.14632	0.43565	0.097358	0.026987	0.93845	0.04912	0.60675	0.56487	0.10302	0.78949	0.56831	0.56487	0.24308	0.80506	0.52768	0.036397	0.46323	0.18691	0.093079	0.16655	0.2368	0.27156	0.14781	0.39744
Transcriptomics	ANAPC15	0.097404	0.095223	0.014502	0.83614	0.66821	0.87993	0.87993	0.32701	0.3749	0.6627	0.18166	0.22706	0.001981	0.012666	0.59265	0.44155	0.60675	0.39744	0.61742	0.89187	0.44793	0.55802	0.95985	0.081931	0.27612	0.3169	0.86684	0.40713	0.52067	0.01944	0.79726	0.78561	0.86803	0.3144	0.47894	0.19588	0.15543	0.39173	0.27383	0.87596	0.51446	0.50139	0.61742	0.9358	0.87993	0.13619	0.93981	0.4885
Transcriptomics	LINC00301	0.69416	0.54782	0.047204	0.42357	0.80896	0.78949	0.068408	0.33213	0.78561	0.051602	0.47894	0.073408	0.073408	0.77786	0.85219	0.020619	0.025288	0.47263	0.94381	0.66821	0.11261	0.14781	0.0084232	0.33472	0.22059	0.036397	0.021381	0.043	0.59275	0.10769	0.30454	0.61386	0.13201	0.21666	0.080971	0.14931	0.47263	0.073593	0.57176	0.018832	0.059638	0.0042661	0.034396	0.023437	0.18868	0.14337	0.78173	0.017378
Transcriptomics	SMIM12	0.41777	0.40898	0.070104	0.51451	0.99197	0.88789	0.74326	0.683	0.56144	0.19107	0.11875	0.136	0.0088887	0.15543	0.69416	0.52326	0.51775	0.22457	0.52436	0.92379	0.60995	0.54444	0.60675	0.060397	0.055239	0.12928	0.72862	0.136	0.84206	0.22258	0.48531	0.37214	0.96386	0.36392	0.621	0.27612	0.31941	0.42368	0.47894	0.72047	0.39173	0.6103	0.81287	0.42666	0.54782	0.059638	0.42964	0.66453
Transcriptomics	RTCA	0.11749	0.57869	0.2854	0.169	0.95985	0.036397	0.11129	0.84036	0.35313	0.33223	0.32193	0.17659	0.06188	0.016283	0.17822	0.045819	0.31941	0.83642	0.67559	0.16655	0.34945	0.076297	0.81287	0.50139	0.78561	0.27383	0.60991	0.051782	0.55342	0.026061	0.062719	0.40031	0.17994	0.81679	0.39173	0.77013	0.60675	0.75475	0.96386	0.034396	0.20515	0.16331	0.090971	0.48212	0.063509	0.23268	0.8601	0.4119
Transcriptomics	CHMP4B	0.034888	0.016283	0.021363	0.56322	0.60321	0.24733	0.14337	0.00026992	0.78561	0.21283	0.42368	0.18048	0.015801	0.015499	0.57522	0.047708	0.86406	0.23063	0.13479	0.39744	0.72312	0.17994	0.20894	0.049772	0.58565	0.1334	0.25799	0.018422	0.63319	0.010645	0.28073	0.57176	0.97189	0.058886	0.32956	0.08586	0.076297	0.27842	0.40031	0.8443	0.53771	0.40319	0.96386	0.86803	0.96788	0.086865	0.21862	0.81287
Transcriptomics	RAP1B	0.026061	0.24947	0.029345	0.81434	0.57869	0.058886	0.3749	0.098508	0.3021	0.83569	0.44474	0.2482	0.070386	0.11251	0.4885	0.32893	0.76628	0.85219	0.66453	0.2648	0.44793	0.47263	0.96788	0.062719	0.99197	0.094146	0.37534	0.19044	0.74158	0.0057644	0.46948	0.57869	0.65354	0.15388	0.40898	0.21862	0.13619	0.47578	0.57869	0.77399	0.5079	0.63899	0.76628	0.81287	0.19226	0.043548	0.90382	0.59968
Transcriptomics	ESPN	0.33992	0.14484	0.56487	0.0076211	0.080019	0.68671	0.011619	0.046578	0.17822	0.37169	0.30944	0.0045645	0.00027542	0.015499	0.84036	0.74801	0.40608	0.9318	0.53771	0.78561	0.70481	0.1834	0.8601	0.21085	0.14632	0.4417	0.74981	0.039702	0.68064	0.77013	0.60321	0.15235	0.8443	0.54107	0.9158	0.58914	0.33213	0.24733	0.47263	0.79337	0.43264	0.95584	0.683	0.57176	1	0.51775	0.30944	0.74326
Transcriptomics	TNS1	0.017378	0.57176	3.3542e-05	0.83614	0.38607	0.073593	0.57869	0.94381	0.12928	0.57575	0.4478	0.26802	0.032589	0.084865	0.14484	0.012717	0.13479	0.087878	0.46948	0.3749	0.22263	0.096309	0.79337	0.061938	0.87199	0.039027	0.92876	0.016746	0.44294	0.017948	0.014024	0.73184	0.14632	0.029345	0.065923	0.025672	0.12793	0.028917	0.17994	0.37214	0.050431	0.047836	0.073593	0.045959	0.19588	0.12526	0.53435	0.039571
Transcriptomics	FAM201A	0.52105	0.041239	0.87596	0.31615	0.064306	0.51775	0.076297	0.024534	0.32446	0.23272	0.24308	0.13124	0.30229	0.10417	0.80506	0.86972	0.14337	0.020383	0.10533	0.99598	0.7109	0.080971	0.1334	0.14781	0.10417	0.47894	0.059226	0.40066	0.88043	0.52105	0.96386	0.68671	0.2854	0.9358	0.36939	0.80896	0.54107	0.73564	0.88789	0.097404	0.32446	0.074486	0.024164	0.1834	0.90382	0.22258	0.0071227	0.010275
Transcriptomics	NHEJ1 /// SLC23A3	0.62817	0.9358	0.42368	0.10921	0.013558	0.55802	0.12132	0.081931	0.10769	0.5479	0.49493	0.70346	0.81434	0.14047	0.078141	0.45911	0.10302	0.039571	0.015756	0.27156	0.2002	0.061164	0.36121	0.43867	0.66453	0.030216	0.14253	0.57089	0.25376	0.32956	0.79337	0.020705	0.0889	0.033429	0.0085791	0.093079	0.074486	0.070104	0.090971	0.11008	0.059638	0.023437	0.017099	0.044142	0.028917	0.92379	0.04912	0.050431
Transcriptomics	TIA1	0.70165	0.9158	0.34517	0.32465	0.026852	0.621	0.45394	0.53101	0.37214	0.23614	0.33213	0.094858	0.0076211	0.63538	0.51775	0.33636	0.0035349	0.0082696	0.061164	0.92779	0.97082	0.54782	0.27156	0.095223	0.3144	0.0059939	0.37845	0.62182	0.03614	0.29968	0.41777	0.56144	0.42964	0.081931	0.040677	0.11498	0.17652	0.054531	0.2854	0.29487	0.17822	0.016283	0.10075	0.20515	0.74709	0.49171	0.15082	0.0028486
Transcriptomics	ZNF835	0.020383	0.3889	0.11623	0.75833	0.53771	0.5079	0.56831	0.061938	0.42072	0.53148	0.57522	0.85805	0.067458	0.0053275	0.89585	0.1245	0.9759	0.97992	0.56487	0.54107	0.48884	0.70915	0.85219	0.057405	0.4885	0.16818	0.88006	0.2434	0.99676	0.058886	0.73184	0.3585	0.48531	0.44474	0.73564	0.46323	0.32701	0.67929	0.80506	0.42666	0.98393	0.78949	0.86406	0.55461	0.82071	0.0082696	0.3889	0.79726
Transcriptomics	LOC728353	0.16655	0.0033159	0.01944	0.51451	0.98393	0.89187	0.63899	0.0889	0.75091	0.84843	0.35581	0.32751	0.013763	0.33213	0.54782	0.39103	0.76628	0.82855	0.75475	0.48212	0.53148	0.40031	0.67559	0.05245	0.33213	0.34517	0.9688	0.37224	0.74158	0.16983	0.94381	0.70165	0.24947	0.045959	0.27383	0.098508	0.18166	0.26929	0.3749	0.70915	0.29248	0.3144	0.6979	0.55121	0.49171	0.19046	0.9198	0.53101
Transcriptomics	UGT3A1	0.099622	0.059638	0.028494	0.022584	0.20327	0.32446	0.14781	0.076297	0.43565	0.045979	0.029345	0.1206	0.028928	0.017099	0.20141	0.15392	0.99598	0.71669	0.11749	0.05177	0.059017	0.045959	0.015499	0.042381	0.9198	0.022728	0.002037	0.0063583	0.13017	0.0066009	0.031561	0.60675	0.26258	0.0026659	0.066743	0.013789	0.034396	0.0026659	0.098508	0.61742	0.043548	0.080971	0.25597	0.13201	0.19046	0.28306	0.97189	0.23474
Transcriptomics	SHC1	0.49171	0.55802	0.2368	0.95099	0.87199	0.43264	0.56831	0.92779	0.57176	0.37169	0.096309	0.84051	0.20288	0.051097	0.50139	0.63176	0.52768	0.67929	0.67929	0.56144	0.59275	0.025288	0.4478	0.14632	0.50139	0.51775	0.5594	0.32751	0.84206	0.17315	0.76243	0.22457	0.76243	0.77013	0.95584	0.79337	0.80506	0.81287	0.89984	0.36939	0.55461	0.45394	0.52768	0.36121	0.62458	0.0081184	0.49816	0.67189
Transcriptomics	LINC00673	0.20894	0.23063	0.048475	0.93765	0.3144	0.3021	0.46948	0.098508	0.55802	0.40885	0.072709	0.15449	0.011226	0.013331	0.99197	0.28984	0.36392	0.81287	0.99197	0.3021	0.63905	0.17652	0.3889	0.00029733	0.92379	0.079076	0.38158	0.073408	0.14955	0.001285	0.71669	0.29487	0.71292	0.081931	0.034396	0.03391	0.024164	0.11623	0.15235	0.99197	0.73184	0.16331	0.46948	0.86406	0.79726	0.22658	0.96386	0.30454
Transcriptomics	---	0.13761	0.18868	0.082901	0.72441	0.96386	0.40319	0.90382	0.51775	0.29727	0.25738	0.23474	0.36915	0.015801	0.024909	0.26704	0.39512	0.56487	0.71669	0.40898	0.97189	0.28748	0.14047	0.36665	0.097404	0.40319	0.48531	0.87124	0.12508	0.82933	0.10888	0.33992	0.59616	0.43565	0.26704	0.38607	0.36939	0.45394	0.80896	0.87596	0.50464	0.58216	0.51775	0.64262	0.84825	0.51446	0.0036106	0.92379	0.73184
Transcriptomics	PABPN1	0.21471	0.028917	0.10769	0.56322	0.38046	0.24733	0.62458	0.56831	0.4885	0.82933	0.014502	0.13761	0.092405	0.05177	0.13903	0.3216	0.72047	0.92779	0.26704	0.83248	0.81033	0.065923	0.23268	0.046578	0.48531	0.19771	0.094858	0.049467	0.7109	0.071832	0.0889	0.62817	0.28775	0.45703	0.21666	0.27842	0.30944	0.49171	0.78173	0.32956	0.47894	0.17315	0.29487	0.71669	0.27383	0.21085	0.86406	0.38326
Transcriptomics	ZNF516	0.58914	0.10188	0.10075	0.12968	0.59616	0.75091	0.097404	0.14484	0.12928	0.065782	0.10302	0.00024588	0.040345	0.25379	0.94782	0.63176	0.89585	0.39173	0.82855	0.78173	0.073108	0.14337	0.024534	0.017099	0.83642	0.042381	0.18842	0.02943	0.29533	0.27842	0.16655	0.89187	0.2452	0.076297	0.069252	0.024909	0.013558	0.0037659	0.037958	0.4478	0.066743	0.075387	0.25597	0.040677	0.72425	0.2286	0.67929	0.16331
Transcriptomics	---	0.56831	0.055239	0.2854	0.69929	0.25162	0.72047	0.82855	0.43565	0.70915	0.52606	0.39458	0.060101	0.15983	0.78949	0.046578	0.36311	0.59265	0.24098	0.45703	0.48531	0.328	0.34254	0.89187	0.91181	0.059638	0.082901	0.36608	0.48202	0.98379	0.2854	0.57522	0.35046	0.05383	0.12262	0.29968	0.57522	0.55121	0.3144	0.78949	0.048475	0.030659	0.096309	0.09202	0.039027	0.0018059	0.71292	0.42368	0.2368
Transcriptomics	PHLDA2	0.22059	0.14632	0.042962	0.7202	0.47578	0.29727	0.13479	0.13064	0.67189	0.5479	0.12793	0.41039	0.060101	0.11251	0.30698	0.082266	0.23268	0.73945	0.97992	0.16818	0.24309	0.96788	0.041807	0.097404	0.56831	0.044741	0.010544	0.40066	0.29533	0.00082729	0.67189	0.64989	0.99197	0.22658	0.24098	0.090971	0.042381	0.15388	0.13064	0.43867	0.11129	0.083878	0.13064	0.32193	0.16331	0.42368	0.48531	0.38046
Transcriptomics	KLRC4-KLRK1 /// KLRK1	0.023798	0.61742	0.018533	0.5594	0.22658	0.11875	0.19771	0.053136	0.45703	0.47844	0.52105	0.096102	0.0015779	0.018239	0.46012	0.024356	0.16818	0.21666	0.77013	0.065923	0.14453	0.4478	0.2286	0.0097391	0.16983	0.0015269	0.36303	0.036605	0.10648	0.00068344	0.3889	0.9358	0.57869	0.023437	0.015756	0.0088982	0.0051196	0.0045362	0.051097	0.26929	0.083878	0.012238	0.054531	0.32446	0.56144	0.66821	0.33992	0.016823
Transcriptomics	LIPT1	0.00084976	0.83248	0.0056525	0.716	0.21278	0.46948	0.86803	0.66453	0.0047242	0.94492	0.9318	0.39105	0.033141	0.12003	0.020705	0.0045411	0.62817	0.064306	0.19046	0.11498	0.30735	0.72425	0.58565	0.81287	0.55121	0.0051196	0.75833	0.088814	0.037044	0.037958	0.04912	0.086865	0.0037659	0.0016026	0.049772	0.017661	0.032954	0.02238	0.032954	0.065923	0.00021396	0.015244	0.0093951	0.010834	0.035888	0.10188	0.077215	0.014993
Transcriptomics	SAMSN1	0.38326	0.47578	0.4478	0.70346	0.75475	0.41483	0.8601	0.64262	0.8601	0.5479	0.19226	0.28352	0.059226	0.0049186	0.32701	0.66279	0.72425	0.87199	0.9158	0.82071	0.45799	0.29248	0.67929	0.0067283	0.3021	0.54107	0.77975	0.36303	0.23614	0.16493	0.53101	0.38326	0.43565	0.40031	0.15235	0.15388	0.029345	0.2452	0.076297	0.95985	0.64625	0.40031	0.52105	0.98795	0.72047	0.098508	0.58565	0.89585
Transcriptomics	TSPEAR	0.0056525	0.29968	0.017661	0.67036	0.47578	0.12394	0.89187	0.65719	0.099622	0.7109	0.96788	0.20714	0.2757	0.22059	0.089931	0.010805	0.82855	0.22457	0.42368	0.82463	0.69269	0.74326	0.95985	0.098508	0.26929	0.0055424	0.74556	0.024271	0.96434	0.1065	0.017378	0.86406	0.014746	0.080019	0.02238	0.060397	0.084865	0.29011	0.33213	0.078141	0.081931	0.018239	0.041239	0.09202	0.040677	0.073593	0.67189	0.14781
Transcriptomics	RABGAP1L	0.51775	0.78949	0.63899	0.75833	0.59265	0.65354	0.87596	0.64262	0.80896	0.26471	0.80896	0.66626	0.14088	0.28306	0.51117	0.30371	0.25816	0.52436	0.9358	0.91181	0.49408	0.74709	0.64262	0.0023834	0.55121	0.02308	0.74556	0.39744	0.68064	0.69043	0.75475	0.33472	0.16818	0.056676	0.019134	0.054531	0.039027	0.060397	0.16983	0.42964	0.15235	0.02308	0.14781	0.15543	0.29011	0.069252	0.8601	0.29487
[truncated: 181 more columns]

## Sheet: S9 - Component 2 Rho Matrix
Table S9. Rho values for correlations between variables presented in Figure 5B (Component 2).
	Block	Metabolomics	Metabolomics	Metabolomics	Metabolomics	Metabolomics	Metabolomics	Metabolomics	Metabolomics	Metabolomics	Metabolomics	Metabolomics	Metabolomics	Metabolomics	Metabolomics	Metabolomics	Metabolomics	Metabolomics	Metabolomics	Metabolomics	Metabolomics	Metabolomics	Metabolomics	Metabolomics	Metabolomics	Metabolomics	Metabolomics	Metabolomics	Metabolomics	Sphingolipids	Sphingolipids	Sphingolipids	Sphingolipids	Sphingolipids	Sphingolipids	Sphingolipids	Sphingolipids	Sphingolipids	Oxylipins	Oxylipins	Oxylipins	Oxylipins	Oxylipins	Oxylipins	Oxylipins	Oxylipins	Oxylipins	Oxylipins	Oxylipins
Block	Variable	Met	Glu	Phe	Indole-3-acetate	Gln	Uridine	Sph(d18:1)	S1P(d18:1)	dh-S1P(d18:0)	Arachidonic acid	DHA	Lyso-PAF(C16:0)	Dodecanedioic acid	Asp-Phe	Pro-Hyp	Decanedioic acid	Glycocholate	Oleic acid	Linoleic acid	12-HETE	Hypoxanthine	dh-Sph(d18:0)	alpha-Linolenic acid	Bilirubin	Methylcysteine	Carnitine(C3:0)	Guanosine	N-Palmitoyltaurine	S1P(d18:1)	dh-S1P(d18:0)	Sph(d18:1)	dh-Sph(d18:0)	Cer(C18:1)	Cer(C24:0)	SM(C24:0)	HexCer(C16:0)	LacCer(C24:0)	13-HODE	9-HODE	12(13)-EpOME	12,13-DiHOME	12-HETE	15-HETE	9(10)-EpOME	12-HEPE	14,15-DiHETE	19,20-DiHDPA	8-HETE
Metabolomics	Met	1	0.07284	0.15867	0.47149	0.14512	0.18803	0.010728	-0.032185	-0.036702	-0.11914	-0.095426	0.21626	-0.18701	-0.020892	0.24286	0.17335	-0.28402	-0.20384	-0.15415	-0.076623	0.19142	0.23433	-0.42631	0.25805	-0.052632	0.39808	-0.1974	-0.46543	-0.086392	-0.038961	-0.25312	-0.12592	-0.029927	-0.20497	-0.30661	-0.022021	-0.29091	-0.045737	-0.19655	-0.10559	-0.032185	0.014116	-0.12253	-0.08978	0.060418	0.013555	-0.098277	-0.053642
Metabolomics	Glu	0.07284	1	0.46245	-0.27612	0.20271	0.26256	0.20836	0.12931	0.24788	0.21287	-0.0050819	0.095426	-0.23117	0.4218	-0.13636	-0.44099	-0.32355	0.35855	0.34839	0.11169	0.37098	0.33597	0.21062	-0.016375	-0.38195	0.11237	-0.062338	0.23839	0.02428	0.19593	0.1829	0.10898	0.3834	0.35968	0.22981	-0.095426	-0.044156	-0.080745	0.075685	-0.1598	-0.23207	0.11462	0.25805	-0.11575	0.17561	-0.31065	-0.29314	0.33145
Metabolomics	Phe	0.15867	0.46245	1	0.26369	-0.20384	0.22417	0.11237	0.55054	0.57764	0.1485	0.031056	0.54037	-0.22597	0.51779	0.019481	-0.0095991	-0.086392	-0.045737	0.047995	-0.14935	0.21287	0.50536	-0.21852	-0.14737	-0.19549	0.39582	-0.25844	0.19917	0.0073405	0.15415	0.21404	0.3371	0.21626	0.20949	0.053642	0.15754	-0.067532	0.099944	0.027676	0.019763	-0.12592	-0.020892	-0.044608	-0.16431	0.0084698	-0.51567	-0.26942	0.080745
Metabolomics	Indole-3-acetate	0.47149	-0.27612	0.26369	1	-0.17561	0.23094	0.025409	0.25127	0.070582	-0.22191	0.11575	0.5223	-0.0077922	0.063806	0.38701	0.45229	0.15076	-0.55505	-0.35065	-0.22208	-0.14173	-0.032185	-0.48842	0.037832	-0.0030075	0.40599	-0.48442	-0.2033	-0.16883	-0.18125	-0.093432	0.029927	-0.19932	-0.15528	-0.28176	0.20158	-0.025974	0.029927	-0.19768	0.13495	0.10559	-0.18803	-0.3642	-0.12479	-0.11124	0.032759	0.039537	-0.30887
Metabolomics	Gln	0.14512	0.20271	-0.20384	-0.17561	1	-0.29418	-0.30322	-0.18916	-0.28741	-0.17335	-0.47487	-0.016375	-0.053247	0.067194	-0.42338	-0.32242	0.11801	-0.17109	-0.2795	-0.23247	-0.015246	-0.15754	0.055901	-0.23772	0.091729	0.11914	0.038961	-0.28999	-0.064935	-0.061547	-0.17497	-0.31338	0.31564	0.079616	-0.098814	-0.054771	-0.045455	-0.16657	-0.1107	-0.12931	0.05703	-0.29193	-0.29983	-0.019763	-0.24562	-0.11861	-0.20616	-0.25579
Metabolomics	Uridine	0.18803	0.26256	0.22417	0.23094	-0.29418	1	0.52005	0.055901	0.069452	-0.063806	0.19481	0.10446	0.23766	0.37662	0.35325	-0.035573	-0.2061	0.0095991	0.25918	0.33636	0.17222	0.22304	-0.0084698	0.345	-0.28872	-0.12818	-0.34286	0.26109	0.36985	0.23885	0.3256	0.41276	0.045737	0.39921	0.49181	0.63862	0.46364	0.35855	0.34115	0.3179	0.36985	0.46697	0.36759	0.050254	0.45229	0.10393	0.14516	0.38792
Metabolomics	Sph(d18:1)	0.010728	0.20836	0.11237	0.025409	-0.30322	0.52005	1	-0.39582	-0.33936	0.30435	0.345	0.10898	0.41948	-0.02428	0.24026	0.27837	-0.027668	0.23207	0.44777	0.31948	-0.10898	0.022021	0.19819	-0.019763	-0.24812	-0.33145	-0.16234	0.03612	0.11914	-0.053642	0.33919	0.35291	-0.33032	0.10333	0.2332	0.26934	0.14156	0.54828	0.63937	0.58329	0.41841	0.42857	0.39921	0.49746	0.37662	0.28579	0.41288	0.43422
Metabolomics	S1P(d18:1)	-0.032185	0.12931	0.55054	0.25127	-0.18916	0.055901	-0.39582	1	0.88255	-0.02428	0.017504	0.49972	-0.36104	0.46584	0.016883	-0.21174	-0.047995	-0.18238	-0.214	0.087013	0.5528	0.46358	-0.17674	-0.078487	-0.13083	0.20497	-0.088312	0.31476	0.32806	0.42744	0.32786	0.38792	0.28289	0.10559	0.026539	0.081875	0.058442	-0.17448	-0.32759	-0.37324	-0.31338	0.028797	-0.0050819	-0.60361	0.12253	-0.44846	-0.39367	0.097685
Metabolomics	dh-S1P(d18:0)	-0.036702	0.24788	0.57764	0.070582	-0.28741	0.069452	-0.33936	0.88255	1	0.214	0.17448	0.49972	-0.33506	0.57199	-0.19351	-0.34274	-0.25014	0.018634	-0.049125	0.24156	0.58103	0.59571	-0.12931	0.14737	-0.25113	0.17109	-0.20779	0.33953	0.36985	0.61604	0.31201	0.37775	0.37888	0.10107	0.11914	0.063806	0.067532	-0.051383	-0.17961	-0.36533	-0.35291	0.25014	0.27273	-0.49181	0.32242	-0.26207	-0.19204	0.2716
Metabolomics	Arachidonic acid	-0.11914	0.21287	0.1485	-0.22191	-0.17335	-0.063806	0.30435	-0.02428	0.214	1	0.68718	0.27724	0	0.19481	-0.0038961	-0.11237	-0.30322	0.46019	0.46132	0.25065	0.010728	0.40937	0.42744	0.017504	0.039098	-0.081875	-0.11299	0.2549	0.35291	0.57199	0.44281	0.40373	0.13834	0.12366	0.24901	-0.13382	-0.081818	0.25918	0.35866	0.17899	-0.047995	0.3913	0.38905	0.38792	0.30774	0.16775	0.38181	0.51666
Metabolomics	DHA	-0.095426	-0.0050819	0.031056	0.11575	-0.47487	0.19481	0.345	0.017504	0.17448	0.68718	1	0.29531	0.20909	0.27499	0.38312	0.098814	-0.28063	0.41502	0.50423	0.37532	-0.0084698	0.17674	0.15867	0.27499	-0.093233	-0.14399	-0.17922	0.22807	0.39582	0.44212	0.60306	0.59797	-0.077357	-0.037832	0.23207	0.011858	0.25584	0.27386	0.26603	0.32016	0.094297	0.47149	0.41841	0.3179	0.45116	0.41514	0.56142	0.42744
Metabolomics	Lyso-PAF(C16:0)	0.21626	0.095426	0.54037	0.5223	-0.016375	0.10446	0.10898	0.49972	0.49972	0.27724	0.29531	1	-0.048052	0.53811	-0.11818	-0.086392	-0.18125	-0.27724	-0.21513	0.14805	0.28063	0.38001	-0.26256	-0.18238	-0.43759	0.20158	-0.48442	0.058824	0.20384	0.34274	0.34655	0.39582	0.31112	-0.13721	-0.08978	0.12366	0.050649	0.34274	0.15702	0.14173	0.061547	0.20949	0.081875	-0.029927	0.32693	-0.11296	0.072861	0.17335
Metabolomics	Dodecanedioic acid	-0.18701	-0.23117	-0.22597	-0.0077922	-0.053247	0.23766	0.41948	-0.36104	-0.33506	0	0.20909	-0.048052	1	-0.014286	0.085714	0.28182	0.18442	-0.061039	0.063636	0.16992	-0.16883	-0.45455	-0.12468	0.22468	0.014035	-0.44286	-0.25974	0.11868	0.39481	0.14935	0.11075	0.27403	-0.38312	-0.11299	0.061039	0.16234	0.48872	0.64805	0.68009	0.74545	0.82597	0.34935	0.28571	0.62857	0.22338	0.43715	0.72816	0.084416
Metabolomics	Asp-Phe	-0.020892	0.4218	0.51779	0.063806	0.067194	0.37662	-0.02428	0.46584	0.57199	0.19481	0.27499	0.53811	-0.014286	1	-0.12727	-0.35743	-0.12027	0.069452	0.028797	0.036364	0.32129	0.52795	-0.001694	0.13043	-0.29774	0.18125	-0.33506	0.38287	0.345	0.5144	0.49321	0.49633	0.607	0.36194	0.39695	0.34952	0.40649	0.19593	0.12256	0.031056	0.050254	0.17899	0.1135	-0.16996	0.27386	-0.13612	-0.009037	0.30322
Metabolomics	Pro-Hyp	0.24286	-0.13636	0.019481	0.38701	-0.42338	0.35325	0.24026	0.016883	-0.19351	-0.0038961	0.38312	-0.11818	0.085714	-0.12727	1	0.50649	0.044156	-0.0051948	0.21299	-0.13083	-0.16234	-0.071429	-0.11039	0.1	0.24812	0.22727	0.17895	0.10049	0.15325	-0.10649	0.20196	0.35195	-0.46753	0	-0.045455	0.012987	0.12331	0.014286	-0.02988	0.21429	0.1987	0.027273	-0.1039	0.051948	-0.072727	-0.04417	0.054545	0.045455
Metabolomics	Decanedioic acid	0.17335	-0.44099	-0.0095991	0.45229	-0.32242	-0.035573	0.27837	-0.21174	-0.34274	-0.11237	0.098814	-0.086392	0.28182	-0.35743	0.50649	1	0.62281	-0.0095991	0.16544	-0.19221	-0.35404	-0.25014	-0.10446	-0.18238	0.51278	0.08865	0.097403	-0.13519	-0.12253	-0.30661	-0.071914	0.049125	-0.62733	-0.011858	-0.044608	0.10785	0.085714	0.21852	0.12031	0.29418	0.30548	-0.099944	-0.26595	0.16996	-0.15528	0.071731	0.14742	-0.0073405
Metabolomics	Glycocholate	-0.28402	-0.32355	-0.086392	0.15076	0.11801	-0.2061	-0.027668	-0.047995	-0.25014	-0.30322	-0.28063	-0.18125	0.18442	-0.12027	0.044156	0.62281	1	0.0028233	0.001694	-0.28052	-0.28741	-0.17448	0.15415	-0.36081	0.54436	0.012987	0.24286	-0.1001	-0.18464	-0.34726	-0.024915	-0.058159	-0.23094	0.2603	0.13495	0.22304	0.19351	0.08978	0.048009	0.13043	0.25127	-0.35968	-0.48617	-0.029927	-0.34839	-0.17566	-0.122	-0.16093
Metabolomics	Oleic acid	-0.20384	0.35855	-0.045737	-0.55505	-0.17109	0.0095991	0.23207	-0.18238	0.018634	0.46019	0.41502	-0.27724	-0.061039	0.069452	-0.0051948	-0.0095991	0.0028233	1	0.83512	0.35065	0.21965	0.29305	0.56183	0.067194	0.037594	-0.16431	0.48442	0.27967	0.17448	0.21174	0.33805	0.22417	0.15076	0.32693	0.50649	-0.080745	0.14156	0.054771	0.21293	-0.038961	-0.15415	0.30322	0.33145	0.1677	0.32919	0.041231	0.0016944	0.58216
Metabolomics	Linoleic acid	-0.15415	0.34839	0.047995	-0.35065	-0.2795	0.25918	0.44777	-0.214	-0.049125	0.46132	0.50423	-0.21513	0.063636	0.028797	0.21299	0.16544	0.001694	0.83512	1	0.54675	0.05703	0.16657	0.43874	0.094297	0.07218	-0.31903	0.26494	0.31889	0.24111	0.21965	0.51246	0.44438	-0.10559	0.37211	0.54037	0.1214	0.29221	0.20723	0.35414	0.26595	0.076228	0.50988	0.45793	0.27386	0.50311	0.10223	0.15589	0.68718
Metabolomics	12-HETE	-0.076623	0.11169	-0.14935	-0.22208	-0.23247	0.33636	0.31948	0.087013	0.24156	0.25065	0.37532	0.14805	0.16992	0.036364	-0.13083	-0.19221	-0.28052	0.35065	0.54675	1	0.45974	0.17273	0.090909	0.28312	-0.37544	-0.64805	-0.0075188	0.21078	0.55714	0.47662	0.54019	0.52078	-0.055844	-0.050649	0.27922	0.16753	0.34887	0.46494	0.46054	0.23636	0.22987	0.95584	0.88961	0.15195	0.96234	0.29295	0.33517	0.73377
Metabolomics	Hypoxanthine	0.19142	0.37098	0.21287	-0.14173	-0.015246	0.17222	-0.10898	0.5528	0.58103	0.010728	-0.0084698	0.28063	-0.16883	0.32129	-0.16234	-0.35404	-0.28741	0.21965	0.05703	0.45974	1	0.53134	-0.19142	-0.02428	-0.33985	-0.079616	0.15714	0.19092	0.5223	0.53247	0.24122	0.29757	0.42292	0.055901	0.098814	-0.13156	0.072727	-0.0062112	-0.1124	-0.34387	-0.2603	0.33823	0.32806	-0.45455	0.46697	-0.22536	-0.36713	0.46471
Metabolomics	dh-Sph(d18:0)	0.23433	0.33597	0.50536	-0.032185	-0.15754	0.22304	0.022021	0.46358	0.59571	0.40937	0.17674	0.38001	-0.45455	0.52795	-0.071429	-0.25014	-0.17448	0.29305	0.16657	0.17273	0.53134	1	0.11237	0.045737	-0.23459	0.23885	0.0012987	0.15377	0.27724	0.43986	0.39864	0.41502	0.49859	0.34726	0.31677	0.086392	-0.2026	0.11801	0.011861	-0.20497	-0.29531	0.20271	0.11914	-0.20271	0.26595	-0.26603	-0.2937	0.40711
Metabolomics	alpha-Linolenic acid	-0.42631	0.21062	-0.21852	-0.48842	0.055901	-0.0084698	0.19819	-0.17674	-0.12931	0.42744	0.15867	-0.26256	-0.12468	-0.001694	-0.11039	-0.10446	0.15415	0.56183	0.43874	0.090909	-0.19142	0.11237	1	-0.16206	0.094737	-0.27386	0.12727	0.26935	0.053642	0.11011	0.30578	0.044608	0.16206	0.53473	0.65782	0.19593	0.12857	0.015246	0.27393	-0.10559	-0.053642	0.068323	0.15415	0.21174	0.0084698	-0.024287	0.01525	0.34952
Metabolomics	Bilirubin	0.25805	-0.016375	-0.14737	0.037832	-0.23772	0.345	-0.019763	-0.078487	0.14737	0.017504	0.27499	-0.18238	0.22468	0.13043	0.1	-0.18238	-0.36081	0.067194	0.094297	0.28312	-0.02428	0.045737	-0.16206	1	-0.22857	-0.010728	-0.27532	-0.11249	0.1135	0.1869	-0.034541	0.079616	-0.1869	-0.16657	-0.061547	0.083004	0.01039	0.1022	0.089805	0.15867	0.18916	0.38227	0.38453	0.18803	0.34387	0.53601	0.51624	-0.001694
Metabolomics	Methylcysteine	-0.052632	-0.38195	-0.19549	-0.0030075	0.091729	-0.28872	-0.24812	-0.13083	-0.25113	0.039098	-0.093233	-0.43759	0.014035	-0.29774	0.24812	0.51278	0.54436	0.037594	0.07218	-0.37544	-0.33985	-0.23459	0.094737	-0.22857	1	0.040602	0.35439	-0.052941	-0.030075	-0.037594	-0.16227	-0.13534	-0.17594	0.10526	0.025564	0.11128	0.12807	-0.24361	-0.21361	-0.06015	0.030075	-0.33985	-0.43609	-0.11729	-0.42707	-0.17149	-0.058647	-0.10677
Metabolomics	Carnitine(C3:0)	0.39808	0.11237	0.39582	0.40599	0.11914	-0.12818	-0.33145	0.20497	0.17109	-0.081875	-0.14399	0.20158	-0.44286	0.18125	0.22727	0.08865	0.012987	-0.16431	-0.31903	-0.64805	-0.079616	0.23885	-0.27386	-0.010728	0.040602	1	0.068831	0.04644	-0.30322	-0.16657	-0.38335	-0.27724	0.13043	0.053642	-0.27724	-0.20497	-0.37532	-0.32016	-0.44677	-0.3371	-0.36872	-0.49068	-0.51892	-0.26369	-0.42067	-0.21406	-0.40779	-0.34726
Metabolomics	Guanosine	-0.1974	-0.062338	-0.25844	-0.48442	0.038961	-0.34286	-0.16234	-0.088312	-0.20779	-0.11299	-0.17922	-0.48442	-0.25974	-0.33506	0.17895	0.097403	0.24286	0.48442	0.26494	-0.0075188	0.15714	0.0012987	0.12727	-0.27532	0.35439	0.068831	1	0.062951	-0.054545	-0.22208	-0.080131	-0.094805	-0.085714	-0.050649	-0.085714	-0.3961	-0.13835	-0.25455	-0.2241	-0.24156	-0.25974	-0.14935	-0.17013	-0.18831	-0.11429	-0.24229	-0.4417	0.12468
Metabolomics	N-Palmitoyltaurine	-0.46543	0.23839	0.19917	-0.2033	-0.28999	0.26109	0.03612	0.31476	0.33953	0.2549	0.22807	0.058824	0.11868	0.38287	0.10049	-0.13519	-0.1001	0.27967	0.31889	0.21078	0.19092	0.15377	0.26935	-0.11249	-0.052941	0.04644	0.062951	1	0.53973	0.57482	0.27476	0.39112	0.20949	0.66151	0.57895	0.12074	0.46956	0.24458	0.31889	0.048504	0.052632	0.35604	0.34572	0.062951	0.31476	-0.075335	-0.055756	0.5129
Sphingolipids	S1P(d18:1)	-0.086392	0.02428	0.0073405	-0.16883	-0.064935	0.36985	0.11914	0.32806	0.36985	0.35291	0.39582	0.20384	0.39481	0.345	0.15325	-0.12253	-0.18464	0.17448	0.24111	0.55714	0.5223	0.27724	0.053642	0.1135	-0.030075	-0.30322	-0.054545	0.53973	1	0.85771	0.59966	0.69509	0.067194	0.24675	0.4218	0.22756	0.53766	0.41615	0.35527	0.17335	0.31903	0.68041	0.57764	0.042349	0.61039	0.17001	0.25925	0.62394
Sphingolipids	dh-S1P(d18:0)	-0.038961	0.19593	0.15415	-0.18125	-0.061547	0.23885	-0.053642	0.42744	0.61604	0.57199	0.44212	0.34274	0.14935	0.5144	-0.10649	-0.30661	-0.34726	0.21174	0.21965	0.47662	0.53247	0.43986	0.11011	0.1869	-0.037594	-0.16657	-0.22208	0.57482	0.85771	1	0.48698	0.5528	0.33936	0.2524	0.4105	0.14399	0.40779	0.28515	0.24965	-0.018634	0.076228	0.62507	0.57425	-0.051383	0.5799	0.1028	0.23496	0.64879
Sphingolipids	Sph(d18:1)	-0.25312	0.1829	0.21404	-0.093432	-0.17497	0.3256	0.33919	0.32786	0.31201	0.44281	0.60306	0.34655	0.11075	0.49321	0.20196	-0.071914	-0.024915	0.33805	0.51246	0.54019	0.24122	0.39864	0.30578	-0.034541	-0.16227	-0.38335	-0.080131	0.27476	0.59966	0.48698	1	0.92073	0.054927	0.33352	0.51133	0.29332	0.38828	0.36014	0.35939	0.33182	0.20951	0.53568	0.4162	0.13817	0.56229	0.053526	0.19315	0.5889
Sphingolipids	dh-Sph(d18:0)	-0.12592	0.10898	0.3371	0.029927	-0.31338	0.41276	0.35291	0.38792	0.37775	0.40373	0.59797	0.39582	0.27403	0.49633	0.35195	0.049125	-0.058159	0.22417	0.44438	0.52078	0.29757	0.41502	0.044608	0.079616	-0.13534	-0.27724	-0.094805	0.39112	0.69509	0.5528	0.92073	1	-0.066064	0.24111	0.37211	0.22868	0.37532	0.49633	0.43039	0.47826	0.35291	0.60926	0.43309	0.2061	0.60474	0.051963	0.25868	0.59345
Sphingolipids	Cer(C18:1)	-0.029927	0.3834	0.21626	-0.19932	0.31564	0.045737	-0.33032	0.28289	0.37888	0.13834	-0.077357	0.31112	-0.38312	0.607	-0.46753	-0.62733	-0.23094	0.15076	-0.10559	-0.055844	0.42292	0.49859	0.16206	-0.1869	-0.17594	0.13043	-0.085714	0.20949	0.067194	0.33936	0.054927	-0.066064	1	0.26821	0.32355	0.10672	0.13896	-0.13382	-0.13781	-0.37775	-0.31564	-0.11237	-0.097685	-0.32129	-0.001694	-0.42474	-0.39198	0.14173
Sphingolipids	Cer(C24:0)	-0.20497	0.35968	0.20949	-0.15528	0.079616	0.39921	0.10333	0.10559	0.10107	0.12366	-0.037832	-0.13721	-0.11299	0.36194	0	-0.011858	0.2603	0.32693	0.37211	-0.050649	0.055901	0.34726	0.53473	-0.16657	0.10526	0.053642	-0.050649	0.66151	0.24675	0.2524	0.33352	0.24111	0.26821	1	0.84077	0.42518	0.28571	-0.04009	0.085851	-0.061547	-0.062676	-0.020892	-0.059289	-0.075099	-0.0062112	-0.122	-0.31065	0.3563
Sphingolipids	SM(C24:0)	-0.30661	0.22981	0.053642	-0.28176	-0.098814	0.49181	0.2332	0.026539	0.11914	0.24901	0.23207	-0.08978	0.061039	0.39695	-0.045455	-0.044608	0.13495	0.50649	0.54037	0.27922	0.098814	0.31677	0.65782	-0.061547	0.025564	-0.27724	-0.085714	0.57895	0.4218	0.4105	0.51133	0.37211	0.32355	0.84077	1	0.61039	0.57662	0.2061	0.32251	0.022021	0.096556	0.31564	0.28063	0.031056	0.29757	0.0073426	-0.020333	0.57425
Sphingolipids	HexCer(C16:0)	-0.022021	-0.095426	0.15754	0.20158	-0.054771	0.63862	0.26934	0.081875	0.063806	-0.13382	0.011858	0.12366	0.16234	0.34952	0.012987	0.10785	0.22304	-0.080745	0.1214	0.16753	-0.13156	0.086392	0.19593	0.083004	0.11128	-0.20497	-0.3961	0.12074	0.22756	0.14399	0.29332	0.22868	0.10672	0.42518	0.61039	1	0.66494	0.28176	0.24174	0.14963	0.35291	0.25014	0.13834	-0.095426	0.21739	0.021463	0.15984	0.17899
Sphingolipids	LacCer(C24:0)	-0.29091	-0.044156	-0.067532	-0.025974	-0.045455	0.46364	0.14156	0.058442	0.067532	-0.081818	0.25584	0.050649	0.48872	0.40649	0.12331	0.085714	0.19351	0.14156	0.29221	0.34887	0.072727	-0.2026	0.12857	0.01039	0.12807	-0.37532	-0.13835	0.46956	0.53766	0.40779	0.38828	0.37532	0.13896	0.28571	0.57662	0.66494	1	0.3961	0.36375	0.24286	0.51299	0.46623	0.37013	-0.035065	0.40909	0.048068	0.2962	0.3974
Oxylipins	13-HODE	-0.045737	-0.080745	0.099944	0.029927	-0.16657	0.35855	0.54828	-0.17448	-0.051383	0.25918	0.27386	0.34274	0.64805	0.19593	0.014286	0.21852	0.08978	0.054771	0.20723	0.46494	-0.0062112	0.11801	0.015246	0.1022	-0.24361	-0.32016	-0.25455	0.24458	0.41615	0.28515	0.36014	0.49633	-0.13382	-0.04009	0.2061	0.28176	0.3961	1	0.92742	0.7301	0.80802	0.66234	0.51214	0.63636	0.55731	0.16154	0.58853	0.43535
Oxylipins	9-HODE	-0.19655	0.075685	0.027676	-0.19768	-0.1107	0.34115	0.63937	-0.32759	-0.17961	0.35866	0.26603	0.15702	0.68009	0.12256	-0.02988	0.12031	0.048009	0.21293	0.35414	0.46054	-0.1124	0.011861	0.27393	0.089805	-0.21361	-0.44677	-0.2241	0.31889	0.35527	0.24965	0.35939	0.43039	-0.13781	0.085851	0.32251	0.24174	0.36375	0.92742	1	0.7512	0.78961	0.63711	0.55916	0.76814	0.50381	0.18079	0.61469	0.47614
Oxylipins	12(13)-EpOME	-0.10559	-0.1598	0.019763	0.13495	-0.12931	0.3179	0.58329	-0.37324	-0.36533	0.17899	0.32016	0.14173	0.74545	0.031056	0.21429	0.29418	0.13043	-0.038961	0.26595	0.23636	-0.34387	-0.20497	-0.10559	0.15867	-0.06015	-0.3371	-0.24156	0.048504	0.17335	-0.018634	0.33182	0.47826	-0.37775	-0.061547	0.022021	0.14963	0.24286	0.7301	0.7512	1	0.83173	0.3913	0.20271	0.81366	0.30774	0.29935	0.64784	0.15754
Oxylipins	12,13-DiHOME	-0.032185	-0.23207	-0.12592	0.10559	0.05703	0.36985	0.41841	-0.31338	-0.35291	-0.047995	0.094297	0.061547	0.82597	0.050254	0.1987	0.30548	0.25127	-0.15415	0.076228	0.22987	-0.2603	-0.29531	-0.053642	0.18916	0.030075	-0.36872	-0.25974	0.052632	0.31903	0.076228	0.20951	0.35291	-0.31564	-0.062676	0.096556	0.35291	0.51299	0.80802	0.78961	0.83173	1	0.43309	0.24901	0.66347	0.2987	0.1943	0.6309	0.13834
Oxylipins	12-HETE	0.014116	0.11462	-0.020892	-0.18803	-0.29193	0.46697	0.42857	0.028797	0.25014	0.3913	0.47149	0.20949	0.34935	0.17899	0.027273	-0.099944	-0.35968	0.30322	0.50988	0.95584	0.33823	0.20271	0.068323	0.38227	-0.33985	-0.49068	-0.14935	0.35604	0.68041	0.62507	0.53568	0.60926	-0.11237	-0.020892	0.31564	0.25014	0.46623	0.66234	0.63711	0.3913	0.43309	1	0.91982	0.30435	0.94692	0.34341	0.52302	0.76285
Oxylipins	15-HETE	-0.12253	0.25805	-0.044608	-0.3642	-0.29983	0.36759	0.39921	-0.0050819	0.27273	0.38905	0.41841	0.081875	0.28571	0.1135	-0.1039	-0.26595	-0.48617	0.33145	0.45793	0.88961	0.32806	0.11914	0.15415	0.38453	-0.43609	-0.51892	-0.17013	0.34572	0.57764	0.57425	0.4162	0.43309	-0.097685	-0.059289	0.28063	0.13834	0.37013	0.51214	0.55916	0.20271	0.24901	0.91982	1	0.22756	0.8419	0.3547	0.49647	0.6646
Oxylipins	9(10)-EpOME	-0.08978	-0.11575	-0.16431	-0.12479	-0.019763	0.050254	0.49746	-0.60361	-0.49181	0.38792	0.3179	-0.029927	0.62857	-0.16996	0.051948	0.16996	-0.029927	0.1677	0.27386	0.15195	-0.45455	-0.20271	0.21174	0.18803	-0.11729	-0.26369	-0.18831	0.062951	0.042349	-0.051383	0.13817	0.2061	-0.32129	-0.075099	0.031056	-0.095426	-0.035065	0.63636	0.76814	0.81366	0.66347	0.30435	0.22756	1	0.16996	0.37842	0.67213	0.096556
Oxylipins	12-HEPE	0.060418	0.17561	0.0084698	-0.11124	-0.24562	0.45229	0.37662	0.12253	0.32242	0.30774	0.45116	0.32693	0.22338	0.27386	-0.072727	-0.15528	-0.34839	0.32919	0.50311	0.96234	0.46697	0.26595	0.0084698	0.34387	-0.42707	-0.42067	-0.11429	0.31476	0.61039	0.5799	0.56229	0.60474	-0.001694	-0.0062112	0.29757	0.21739	0.40909	0.55731	0.50381	0.30774	0.2987	0.94692	0.8419	0.16996	1	0.33889	0.37842	0.7843
Oxylipins	14,15-DiHETE	0.013555	-0.31065	-0.51567	0.032759	-0.11861	0.10393	0.28579	-0.44846	-0.26207	0.16775	0.41514	-0.11296	0.43715	-0.13612	-0.04417	0.071731	-0.17566	0.041231	0.10223	0.29295	-0.22536	-0.26603	-0.024287	0.53601	-0.17149	-0.21406	-0.24229	-0.075335	0.17001	0.1028	0.053526	0.051963	-0.42474	-0.122	0.0073426	0.021463	0.048068	0.16154	0.18079	0.29935	0.1943	0.34341	0.3547	0.37842	0.33889	1	0.68701	0.079639
Oxylipins	19,20-DiHDPA	-0.098277	-0.29314	-0.26942	0.039537	-0.20616	0.14516	0.41288	-0.39367	-0.19204	0.38181	0.56142	0.072861	0.72816	-0.009037	0.054545	0.14742	-0.122	0.0016944	0.15589	0.33517	-0.36713	-0.2937	0.01525	0.51624	-0.058647	-0.40779	-0.4417	-0.055756	0.25925	0.23496	0.19315	0.25868	-0.39198	-0.31065	-0.020333	0.15984	0.2962	0.58853	0.61469	0.64784	0.6309	0.52302	0.49647	0.67213	0.37842	0.68701	1	0.12031
Oxylipins	8-HETE	-0.053642	0.33145	0.080745	-0.30887	-0.25579	0.38792	0.43422	0.097685	0.2716	0.51666	0.42744	0.17335	0.084416	0.30322	0.045455	-0.0073405	-0.16093	0.58216	0.68718	0.73377	0.46471	0.40711	0.34952	-0.001694	-0.10677	-0.34726	0.12468	0.5129	0.62394	0.64879	0.5889	0.59345	0.14173	0.3563	0.57425	0.17899	0.3974	0.43535	0.47614	0.15754	0.13834	0.76285	0.6646	0.096556	0.7843	0.079639	0.12031	1
[truncated: 57 more rows]
[truncated: 57 more columns]

## Sheet: S 10 Component 2 P-value Matrix
Table S10. P-values for correlations between variables presented in Figure 5B (Component 2).
[truncated: 107 more rows]
[truncated: 57 more columns]
